# Supplementary material for: Extensive Gene-Specific Translational Reprogramming in a Model of B Cell Differentiation and Abl-Dependent Transformation
Source: PLoS One. 2012 May 31;7(5):e37108. doi: 10.1371/journal.pone.0037108 (PMC3365017; doi:10.1371/journal.pone.0037108)
Supplement: Table S1 — Genes for which we acquired pSILAC, Gradient Encoding, and mRNA abundance data. Gradient Encoding and mRNA abundance data for multiple oligos representing the same gene were averaged. All values are given as Log2 (treated/untreated) and are sorted in ascending order for pSILAC value. (XLS) [file pone.0037108.s004.xls]

## Sheet: Table S1. SILAC.txt
Table S1. SILAC, average change in translation, and average change in mRNA abundance after imatinib treatment.
Gene.Symbol	alternate name	desc	Change in Protein production (Log2(+/-Imatinib))	Average Translation Change	Average Abundance Change
Rps12;Gm15887;Gm14059		RIBOSOMAL PROTEIN S12.;SIMILAR TO 40S RIBOSOMAL PROTEIN S12.	-2.04167	-0.331253	-0.590397
Gm5908;Rpl27a		HYPOTHETICAL PROTEIN.;60S RIBOSOMAL PROTEIN L27A.	-1.73848	-0.941298	-0.0130391
Gm9026;LOC675192;Rpl13;Gm15710;Gm12918;Rpl13		HYPOTHETICAL PROTEIN.;60S RIBOSOMAL PROTEIN L13.;22 KDA PROTEIN.	-1.47295	-1.00865	-0.104574
Rps28;Gm10443		40S RIBOSOMAL PROTEIN S28.	-1.45635	-0.624113	0.213229
Rps20		40S RIBOSOMAL PROTEIN S20.	-1.43848	-0.283725	-1.34937
Rps16		RPS16 PROTEIN.	-1.40427	-0.888279	-0.129212
Rps14		40S RIBOSOMAL PROTEIN S14.	-1.37638	-0.556963	0.337504
Rps5		20 KDA PROTEIN.;RIBOSOMAL PROTEIN S5.	-1.35373	-0.658494	1.21152
Rps21		40S RIBOSOMAL PROTEIN S21.	-1.25059	-1.36181	0.700064
Hspa8		HEAT SHOCK COGNATE 71 KDA PROTEIN.;HSPA8 PROTEIN.	-1.23653	-1.18258	-1.97856
Rpl7		60S RIBOSOMAL PROTEIN L7.;PROTEIN.	-1.11797	-2.04159	-0.16248
Rpl22;mCG_130059		60S RIBOSOMAL PROTEIN L22.	-1.08682	-0.498934	0.302526
Rps3a;Gm10119		40S RIBOSOMAL PROTEIN S3A.;SIMILAR TO RIBOSOMAL PROTEIN S3A.	-1.04526	-0.784793	0.223889
Mybbp1a		MYB-BINDING PROTEIN 1A.	-1.02394	-0.51506	-3.34758
Pabpc1		POLYADENYLATE-BINDING PROTEIN 1.;PUTATIVE UNCHARACTERIZED PROTEIN.	-1.01532	-0.118741	-0.174466
Ii	Cd74		-1.00067	-0.32775	-0.668084
Rps3		40S RIBOSOMAL PROTEIN S3.	-0.990302	-0.752083	-0.463903
Rps10		40S RIBOSOMAL PROTEIN S10.	-0.988507	-0.936854	0.0310709
Gm15501;Rps8;Gm11353;Gm6998;Rps8		40S RIBOSOMAL PROTEIN S8.;RIBOSOMAL PROTEIN S8.;SIMILAR TO RIBOSOMAL PROTEIN S8 ISOFORM 2.	-0.964324	-1.1455	-0.146353
Eef1a1		ELONGATION FACTOR 1-ALPHA 1.	-0.947952	-1.24298	-0.158206
Gm10191;Rpl31;Gm8759;LOC638399		60S RIBOSOMAL PROTEIN L31.;HYPOTHETICAL PROTEIN ISOFORM 1.	-0.922839	-0.905338	-0.0622858
Eef2		ELONGATION FACTOR 2.	-0.906469	-0.857508	-0.199999
Csda		ISOFORM 2 OF DNA-BINDING PROTEIN A.;ISOFORM 1 OF DNA-BINDING PROTEIN A.	-0.883329	-0.366394	-2.5936
Rpl4		60S RIBOSOMAL PROTEIN L4.	-0.874456	-1.147	-0.249145
Rps19;Gm6636;Gm4327;Gm8683		40S RIBOSOMAL PROTEIN S19.;HYPOTHETICAL PROTEIN.;19 KDA PROTEIN.;23 KDA PROTEIN.;15 KDA PROTEIN.;RPS19 PROTEIN.	-0.86745	-0.0925093	-2.0694
Rpl12		60S RIBOSOMAL PROTEIN L12.	-0.846028	-0.681394	-1.05293
Hspa5		78 KDA GLUCOSE-REGULATED PROTEIN.	-0.791756	-0.324593	-3.05844
Rpl18		60S RIBOSOMAL PROTEIN L18.	-0.753185	-0.866491	-0.221474
Nap1l4		PUTATIVE UNCHARACTERIZED PROTEIN.;NUCLEOSOME ASSEMBLY PROTEIN 1-LIKE 4.	-0.749817	-0.0958139	-1.04458
Nap1l1		NUCLEOSOME ASSEMBLY PROTEIN 1-LIKE 1.;NUCLEOSOME ASSEMBLY PROTEIN 1-LIKE 1 ISOFORM 1.	-0.749817	-0.708451	-0.959697
Phb		PROHIBITIN.	-0.74309	-0.276026	-2.79954
Rpl38;Gm7379		60S RIBOSOMAL PROTEIN L38.	-0.735066	-0.590763	-1.27601
LOC100048340;Gm10159;LOC100044992;Gm6573;Rps13;Gm12270		40S RIBOSOMAL PROTEIN S13.;SIMILAR TO RPS13 PROTEIN.	-0.710186	-0.568307	-1.19163
Idh3a		ISOFORM 1 OF ISOCITRATE DEHYDROGENASE [NAD] SUBUNIT ALPHA, MITOCHONDRIAL.;"ISOFORM 2 OF ISOCITRATE DEHYDROGENASE [NAD] SUBUNIT ALPHA, MITOCHONDRIAL."	-0.705674	-0.245743	-2.65408
Ldh1	Ldha	L-LACTATE DEHYDROGENASE A CHAIN.;LACTATE DEHYDROGENASE A ISOFORM 2.	-0.702666	-0.294404	-1.50606
Nhp2		H/ACA RIBONUCLEOPROTEIN COMPLEX SUBUNIT 2.	-0.675268	-0.689059	-2.4404
Coro1a		CORONIN-1A.	-0.653163	-0.983933	-2.22292
Hyou1		HYPOXIA UP-REGULATED PROTEIN 1.	-0.648667	-0.410366	-2.05256
Tra1	Hsp90b1	ENDOPLASMIN.	-0.640968	-0.390169	-2.08823
Nme2		NUCLEOSIDE DIPHOSPHATE KINASE B.	-0.635129	-0.959911	-0.841094
Eif4a1		EUKARYOTIC INITIATION FACTOR 4A-I.;EUKARYOTIC TRANSLATION INITIATION FACTOR 4A1 ISOFORM 2.	-0.623	-0.712928	-2.1491
Rps11		PUTATIVE UNCHARACTERIZED PROTEIN.;40S RIBOSOMAL PROTEIN S11.	-0.617973	-1.12128	-0.372139
Hspa9a	Hspa9	STRESS-70 PROTEIN, MITOCHONDRIAL.;HEAT SHOCK PROTEIN 9.	-0.615468	-0.478043	-3.0187
Slc3a2		4F2 CELL-SURFACE ANTIGEN HEAVY CHAIN.;"SOLUTE CARRIER FAMILY 3, MEMBER 2 ISOFORM A."	-0.615342	-0.431356	-2.04447
Eef1d		ISOFORM 2 OF ELONGATION FACTOR 1-DELTA.;61 KDA PROTEIN.	-0.60837	-1.45752	-1.2683
Ncl		NUCLEOLIN.	-0.601904	-1.05368	-2.53399
Aprt		ADENINE PHOSPHORIBOSYLTRANSFERASE.	-0.599584	-1.12177	-1.65017
Cct2		T-COMPLEX PROTEIN 1 SUBUNIT BETA.	-0.59899	-1.08286	-1.03372
G3bp	G3bp1	RAS GTPASE-ACTIVATING PROTEIN-BINDING PROTEIN 1.	-0.595432	-0.0676546	-1.2248
LOC676847;Gm7263;Rps15a		SIMILAR TO RPS15A PROTEIN.;40S RIBOSOMAL PROTEIN S15A.	-0.575549	-0.0199453	-0.460497
Hnrpa1	Hnrnpa1	PUTATIVE UNCHARACTERIZED PROTEIN.;ISOFORM LONG OF HETEROGENEOUS NUCLEAR RIBONUCLEOPROTEIN A1.	-0.573628	-1.24533	-0.186549
Ubap2l		ISOFORM 5 OF UBIQUITIN-ASSOCIATED PROTEIN 2-LIKE.;ISOFORM 4 OF UBIQUITIN-ASSOCIATED PROTEIN 2-LIKE.;ISOFORM 2 OF UBIQUITIN-ASSOCIATED PROTEIN 2-LIKE.;ISOFORM 3 OF UBIQUITIN-ASSOCIATED PROTEIN 2-LIKE.;ISOFORM 1 OF UBIQUITIN-ASSOCIATED PROTEIN 2-LIKE.;NICE-4 PROTEIN HOMOLOG ISOFORM 2.;NICE-4 PROTEIN HOMOLOG ISOFORM 6.	-0.568068	-0.00606634	-0.717094
Prdx3		THIOREDOXIN-DEPENDENT PEROXIDE REDUCTASE, MITOCHONDRIAL.	-0.563097	-0.784799	-1.47801
Hspcb	Hsp90ab1	MCG18238.	-0.563003	-1.34389	-0.353916
Imp3		U3 SMALL NUCLEOLAR RIBONUCLEOPROTEIN PROTEIN IMP3.	-0.542166	-0.579316	-0.760115
Cct3		T-COMPLEX PROTEIN 1 SUBUNIT GAMMA.	-0.537452	-0.524564	-2.52806
Aimp1;Scye1		SMALL INDUCIBLE CYTOKINE SUBFAMILY E, MEMBER 1.	-0.533107	-0.910313	-0.225287
Rbm3		PUTATIVE RNA-BINDING PROTEIN 3.;RBM3 PROTEIN.	-0.519495	-0.376556	-0.762622
Ssr4		SIGNAL SEQUENCE RECEPTOR, DELTA, ISOFORM CRA_C.	-0.50746	-0.812876	-0.617771
Cyb5		CYTOCHROME B5.;11 KDA PROTEIN.	-0.503696	0.064437	-0.963004
Nhp2l1;Gm5616		NHP2-LIKE PROTEIN 1.	-0.500766	-0.17672	-0.604348
Sf3b2		PUTATIVE UNCHARACTERIZED PROTEIN.	-0.500053	-0.284481	-1.09413
Gm10184;Kpna2;Gm10259		IMPORTIN SUBUNIT ALPHA-2.	-0.495347	-0.0663093	-1.80787
Psmb1		PROTEASOME SUBUNIT BETA TYPE-1.	-0.4943	-0.616653	-0.637509
Lcp1		PLASTIN-2.	-0.472456	-0.201754	-2.11536
Tagln2		TRANSGELIN-2.	-0.466134	-0.474219	-2.19456
Kpnb1		IMPORTIN SUBUNIT BETA-1.;KARYOPHERIN (IMPORTIN) BETA 1.	-0.460725	-0.310416	-1.1597
Pabpc4		POLY(A) BINDING PROTEIN, CYTOPLASMIC 4.;"MCG5546, ISOFORM CRA_C.";"POLY A BINDING PROTEIN, CYTOPLASMIC 4.";68 KDA PROTEIN.	-0.452991	-0.467206	-0.538225
Snx2		SORTING NEXIN-2.	-0.444362	0.02522	-0.725531
Atp5d		ATP SYNTHASE SUBUNIT DELTA, MITOCHONDRIAL.	-0.443952	-0.673345	-0.493482
Pdcd5;Gm3837;Pdcd5		PROGRAMMED CELL DEATH PROTEIN 5.;22 KDA PROTEIN.	-0.422235	-0.165833	-1.66525
Gsto1		GLUTATHIONE S-TRANSFERASE OMEGA-1.	-0.410455	-0.240596	-1.88934
Eif3a		EUKARYOTIC TRANSLATION INITIATION FACTOR 3 SUBUNIT A.	-0.406055	-0.239032	-1.09123
Cnbp1	Cnbp	ISOFORM 1 OF CELLULAR NUCLEIC ACID-BINDING PROTEIN.;CELLULAR NUCLEIC ACID BINDING PROTEIN ISOFORM 2.	-0.405543	0.126893	-2.07174
Cnbp		ISOFORM 1 OF CELLULAR NUCLEIC ACID-BINDING PROTEIN.;CELLULAR NUCLEIC ACID BINDING PROTEIN ISOFORM 2.	-0.405543	0.126893	-2.07174
Eif1;Eif1b;LOC631966;Gm6900		EUKARYOTIC TRANSLATION INITIATION FACTOR 1.;EUKARYOTIC TRANSLATION INITIATION FACTOR 1B.;SIMILAR TO PUTATIVE TRANSLATION INITIATION FACTOR A121/SUI1.;HYPOTHETICAL PROTEIN LOC628596.	-0.385993	0.0174169	-0.0536095
Ywhaz		14-3-3 PROTEIN ZETA/DELTA.	-0.374914	0.0415414	-1.42682
LOC100048559;Sfrs1;Sfrs1		ISOFORM 1 OF SPLICING FACTOR, ARGININE/SERINE-RICH 1.;"ISOFORM 2 OF SPLICING FACTOR, ARGININE/SERINE-RICH 1.";"ISOFORM 3 OF SPLICING FACTOR, ARGININE/SERINE-RICH 1."	-0.368763	-0.0581603	-1.24996
Hspca	Hsp90aa1	HEAT SHOCK PROTEIN HSP 90-ALPHA.	-0.36361	-0.133692	-2.30401
Ube2n		UBIQUITIN-CONJUGATING ENZYME E2 N.;SIMILAR TO UBIQUITIN-CONJUGATING ENZYME E2 UBCH-BEN.	-0.348817	0.00355495	-0.170928
Eif5a		EUKARYOTIC TRANSLATION INITIATION FACTOR 5A-1.;16 KDA PROTEIN.	-0.346245	-0.0692365	-2.19554
Nsfl1c		ISOFORM 3 OF NSFL1 COFACTOR P47.;ISOFORM 1 OF NSFL1 COFACTOR P47.	-0.339785	-0.00665659	-1.39716
Fubp1		PUTATIVE UNCHARACTERIZED PROTEIN.;ISOFORM 2 OF FAR UPSTREAM ELEMENT-BINDING PROTEIN 1.;ISOFORM 1 OF FAR UPSTREAM ELEMENT-BINDING PROTEIN 1.	-0.328621	-0.357046	-1.51742
D11Ertd603e	Nudcd2	NUDC DOMAIN-CONTAINING PROTEIN 2.	-0.328548	0.0207562	-2.51945
Sfrs3		ISOFORM LONG OF SPLICING FACTOR, ARGININE/SERINE-RICH 3.;"ISOFORM SHORT OF SPLICING FACTOR, ARGININE/SERINE-RICH 3."	-0.327666	-0.114405	-0.993942
Nars		ASPARAGINYL-TRNA SYNTHETASE, CYTOPLASMIC.;ASPARAGINYL-TRNA SYNTHETASE ISOFORM 2.	-0.322739	-0.275374	-1.92438
Gars		GLYCYL-TRNA SYNTHETASE.	-0.313807	-0.320731	-2.34324
LOC100044514;Nutf2;Gm10349;Gm10333		NUCLEAR TRANSPORT FACTOR 2.	-0.309326	-0.0144948	-1.07649
Hnrpu	Hnrnpu	PUTATIVE UNCHARACTERIZED PROTEIN.	-0.301839	-0.188515	-1.14836
Phgdh		D-3-PHOSPHOGLYCERATE DEHYDROGENASE.	-0.301477	-0.253194	-1.82822
Rdx		RADIXIN ISOFORM A.	-0.298106	0.019735	-0.0921925
Grp58	Pdia3	PROTEIN DISULFIDE-ISOMERASE A3.	-0.292214	-0.756084	-2.5715
1810044O22Rik	Cyb5b	CYTOCHROME B5 TYPE B.	-0.26764	0.0403031	-0.574662
Lsm6		U6 SNRNA-ASSOCIATED SM-LIKE PROTEIN LSM6.	-0.263891	0.0688976	-0.791207
Pcbp2		ISOFORM 1 OF POLY(RC)-BINDING PROTEIN 2.;ISOFORM 2 OF POLY(RC)-BINDING PROTEIN 2.;ISOFORM 3 OF POLY(RC)-BINDING PROTEIN 2.	-0.261711	-0.649553	0.322487
Sfrs7		ISOFORM 2 OF SPLICING FACTOR, ARGININE/SERINE-RICH 7.;"ISOFORM 1 OF SPLICING FACTOR, ARGININE/SERINE-RICH 7.";"ISOFORM 3 OF SPLICING FACTOR, ARGININE/SERINE-RICH 7.";"ISOFORM 4 OF SPLICING FACTOR, ARGININE/SERINE-RICH 7."	-0.260981	-0.0850442	-0.965631
Pafah1b2		PLATELET-ACTIVATING FACTOR ACETYLHYDROLASE IB SUBUNIT BETA.	-0.258089	0.0845697	-0.704001
Ian1	Gimap4	GTPASE, IMAP FAMILY MEMBER 4 ISOFORM A.;GTPASE IMAP FAMILY MEMBER 4.	-0.256858	-0.147824	-1.66287
Phf5a		PHD FINGER-LIKE DOMAIN-CONTAINING PROTEIN 5A.	-0.25416	-0.0942301	-0.761198
Hspd1		ISOFORM 1 OF 60 KDA HEAT SHOCK PROTEIN, MITOCHONDRIAL.	-0.252666	-1.00111	-3.31972
Mrpl53		39S RIBOSOMAL PROTEIN L53, MITOCHONDRIAL.	-0.24897	-0.0617922	-1.06093
Snrpe		SMALL NUCLEAR RIBONUCLEOPROTEIN E.	-0.242632	-0.212228	-0.200975
Mif		MACROPHAGE MIGRATION INHIBITORY FACTOR.	-0.241281	-0.16643	-4.73986
Ube2m		NEDD8-CONJUGATING ENZYME UBC12.	-0.237186	0.140488	-0.655909
Abl1		ISOFORM III OF PROTO-ONCOGENE TYROSINE-PROTEIN KINASE ABL1.;ISOFORM IV OF PROTO-ONCOGENE TYROSINE-PROTEIN KINASE ABL1.;ISOFORM II OF PROTO-ONCOGENE TYROSINE-PROTEIN KINASE ABL1.;ISOFORM I OF PROTO-ONCOGENE TYROSINE-PROTEIN KINASE ABL1.	-0.236969	0.112013	0.0598423
Pgrmc1		MEMBRANE-ASSOCIATED PROGESTERONE RECEPTOR COMPONENT 1.	-0.228996	-0.0353845	-0.413039
Ezr;LOC100044177		EZRIN.	-0.222479	-0.0541049	-1.05907
Hnrnpa0		HETEROGENEOUS NUCLEAR RIBONUCLEOPROTEIN A0.	-0.21811	-0.393661	-0.332153
Sod1		SUPEROXIDE DISMUTASE [CU-ZN].	-0.217421	-0.670713	-1.47287
Pcbp1		POLY(RC)-BINDING PROTEIN 1.	-0.211111	-0.236898	-2.05949
4833420K19Rik	Dcun1d5	DCN1-LIKE PROTEIN 5.	-0.205351	-0.00581	-0.582424
Grim19	Ndufa13	NADH DEHYDROGENASE [UBIQUINONE] 1 ALPHA SUBCOMPLEX SUBUNIT 13.	-0.203824	-0.736236	-1.08427
Npm1;LOC100046628		NUCLEOPHOSMIN.;NUCLEOPHOSMIN 1.;PUTATIVE UNCHARACTERIZED PROTEIN.;SIMILAR TO NUCLEOPHOSMIN.	-0.194067	-1.61029	-1.63296
Msn		MOESIN.	-0.193626	0.118281	-0.393975
Hnrpf	Hnrnpf	ISOFORM 1 OF HETEROGENEOUS NUCLEAR RIBONUCLEOPROTEIN F.;ISOFORM 2 OF HETEROGENEOUS NUCLEAR RIBONUCLEOPROTEIN F.	-0.192697	0.0564475	-1.07804
Fkbp1a		PEPTIDYL-PROLYL CIS-TRANS ISOMERASE FKBP1A.;PUTATIVE UNCHARACTERIZED PROTEIN.	-0.188496	-0.0881404	-2.12709
Hspa4		HEAT SHOCK 70 KDA PROTEIN 4.	-0.187208	-0.470185	-2.21825
0610011D08Rik	2610030H06Rik	ISOFORM 1 OF VACUOLAR ATPASE ASSEMBLY INTEGRAL MEMBRANE PROTEIN VMA21.;ISOFORM 2 OF VACUOLAR ATPASE ASSEMBLY INTEGRAL MEMBRANE PROTEIN VMA21.	-0.185134	-0.0552852	-0.456908
2610030H06Rik	VMA21		-0.185134	0.203093	-0.726751
Atp5h;LOC100044492;Gm10250		ATP SYNTHASE SUBUNIT D, MITOCHONDRIAL.;HYPOTHETICAL PROTEIN.	-0.178251	-0.243502	-0.437403
Sfrs13a		ISOFORM 3 OF FUS-INTERACTING SERINE-ARGININE-RICH PROTEIN 1.;PUTATIVE UNCHARACTERIZED PROTEIN.;ISOFORM 2 OF FUS-INTERACTING SERINE-ARGININE-RICH PROTEIN 1.	-0.162927	0.130523	-0.457431
Psme1		PROTEASOME ACTIVATOR COMPLEX SUBUNIT 1.	-0.158239	-0.543514	-1.13773
Cbfb		ISOFORM 1 OF CORE-BINDING FACTOR SUBUNIT BETA.;ISOFORM 2 OF CORE-BINDING FACTOR SUBUNIT BETA.;ISOFORM 4 OF CORE-BINDING FACTOR SUBUNIT BETA.	-0.135485	0.256213	-0.147167
Rbm8	Rbm8a	ISOFORM 2 OF RNA-BINDING PROTEIN 8A.;ISOFORM 1 OF RNA-BINDING PROTEIN 8A.	-0.126121	-0.0449449	-0.491407
Snrpg;Gm8186		SMALL NUCLEAR RIBONUCLEOPROTEIN G.	-0.120683	-0.291089	0.386918
Snx5		SORTING NEXIN-5.	-0.110377	-0.484546	0.196922
Ywhag		14-3-3 PROTEIN GAMMA.	-0.108805	-0.0137333	0.292687
Txnl5	Txndc17	THIOREDOXIN DOMAIN-CONTAINING PROTEIN 17.	-0.100475	-0.209407	-0.46075
Ppia		PEPTIDYL-PROLYL CIS-TRANS ISOMERASE.	-0.099633	-0.572343	-0.698623
P4hb		PUTATIVE UNCHARACTERIZED PROTEIN.;PROTEIN DISULFIDE-ISOMERASE.	-0.0995943	-0.7902	-1.11976
Atp5b		ATP SYNTHASE SUBUNIT BETA, MITOCHONDRIAL.	-0.0956816	-0.733686	-2.27186
Pgk1		PHOSPHOGLYCERATE KINASE 1.	-0.0914211	-0.68464	-0.27994
Tpr		TRANSLOCATED PROMOTER REGION, ISOFORM CRA_B.	-0.0835775	-0.0320971	-0.968325
Atp5j2		ATP SYNTHASE SUBUNIT F, MITOCHONDRIAL.;9 KDA PROTEIN.	-0.0816625	0.0847598	-0.587667
Commd3		COMM DOMAIN-CONTAINING PROTEIN 3.	-0.0796472	-0.00414654	0.0332321
Skp1a		S-PHASE KINASE-ASSOCIATED PROTEIN 1.	-0.0784681	-0.0501612	-0.561144
Ndufa6		NADH DEHYDROGENASE [UBIQUINONE] 1 ALPHA SUBCOMPLEX SUBUNIT 6.	-0.0736414	-0.526238	0.293348
Got2		ASPARTATE AMINOTRANSFERASE, MITOCHONDRIAL.	-0.0733696	-0.702378	-1.09902
Arf1;Arf3		ADP-RIBOSYLATION FACTOR 1.;ADP-RIBOSYLATION FACTOR 3.	-0.071859	0.0115912	-0.356918
Fabp5		FATTY ACID-BINDING PROTEIN, EPIDERMAL.	-0.0708694	-0.0393838	-0.80493
Pgrmc2		MEMBRANE-ASSOCIATED PROGESTERONE RECEPTOR COMPONENT 2.	-0.0704274	-0.03657	-0.224255
1190002L16Rik	2900073G15Rik	MYOSIN LIGHT CHAIN, REGULATORY B-LIKE.;PUTATIVE UNCHARACTERIZED PROTEIN.	-0.0685563	-0.579316	-0.760115
2900073G15Rik		MYOSIN LIGHT CHAIN, REGULATORY B-LIK	-0.0685563	0.0492814	-0.335487
Cks1b;Gm6531		CYCLIN-DEPENDENT KINASES REGULATORY SUBUNIT 1.;PREDICTED.;PUTATIVE UNCHARACTERIZED PROTEIN.	-0.0628326	0.254722	-0.392956
Mbd3		ISOFORM 1 OF METHYL-CPG-BINDING DOMAIN PROTEIN 3.;ISOFORM 2 OF METHYL-CPG-BINDING DOMAIN PROTEIN 3.;29 KDA PROTEIN.;PROTEIN.;31 KDA PROTEIN.	-0.0624421	-0.0665564	-0.713923
Gm5506;Eno1;Gm4735;LOC100044223		ALPHA-ENOLASE.	-0.059926	-0.368914	-2.859
Tpm3		PUTATIVE UNCHARACTERIZED PROTEIN.;29 KDA PROTEIN.	-0.0545838	0.0435016	-0.848584
Actn4		ALPHA-ACTININ-4.	-0.0510897	-0.000526988	-0.140357
Psmb2		PROTEASOME SUBUNIT BETA TYPE-2.	-0.0498149	-0.213676	-1.3417
Ube2v1		ISOFORM 1 OF UBIQUITIN-CONJUGATING ENZYME E2 VARIANT 1.;UBIQUITIN-CONJUGATING ENZYME E2 VARIANT 1.;"NOVEL PROTEIN, POSSIBLE ORTHOLOGUE OF HUMAN TMEM189-UBE2V1."	-0.0380433	-0.181516	-0.665444
Hars2	Dtd1	ISOFRM 1 OF D-TYROSYL-TRNA(TYR) DEACYLASE 1.	-0.033011	-0.18364	-1.981
Aldoa		FRUCTOSE-BISPHOSPHATE ALDOLASE A.;FRUCTOSE-BISPHOSPHATE ALDOLASE.	-0.031101	-0.65879	-0.0471894
1500011L16Rik	Ssu72	ISOFORM 1 OF RNA POLYMERASE II SUBUNIT A C-TERMINAL DOMAIN PHOSPHATASE SSU72.;ISOFORM 2 OF RNA POLYMERASE II SUBUNIT A C-TERMINAL DOMAIN PHOSPHATASE SSU72.	-0.02681	-0.0372956	0.122396
Canx		CALNEXIN.	-0.0236638	-0.457377	-1.65241
Ywhae		14-3-3 PROTEIN EPSILON.	-0.0228469	-0.185681	-0.792098
Sart1		U4/U6.U5 TRI-SNRNP-ASSOCIATED PROTEIN 1.	-0.021651	-0.138249	-0.184877
Hnrpk	Hnrnpk	ISOFORM 1 OF HETEROGENEOUS NUCLEAR RIBONUCLEOPROTEIN K.;ISOFORM 2 OF HETEROGENEOUS NUCLEAR RIBONUCLEOPROTEIN K.	-0.0178175	0.12669	-0.660789
Rbbp7		HISTONE-BINDING PROTEIN RBBP7.;RETINOBLASTOMA BINDING PROTEIN 7.	-0.00028078	0.0867297	-1.30732
Gdi2		ISOFORM 1 OF RAB GDP DISSOCIATION INHIBITOR BETA.;ISOFORM 2 OF RAB GDP DISSOCIATION INHIBITOR BETA.	0.00599019	-0.616098	-0.0233991
Prdx5		ISOFORM MITOCHONDRIAL OF PEROXIREDOXIN-5, MITOCHONDRIAL.;"ISOFORM CYTOPLASMIC+PEROXISOMAL OF PEROXIREDOXIN-5, MITOCHONDRIAL."	0.00838837	0.0803351	-0.564333
Dncl2a	Dynlrb1	DYNEIN LIGHT CHAIN ROADBLOCK-TYPE 1.	0.0119892	0.153502	-0.0457686
Actb;Actg1		ACTIN, CYTOPLASMIC 1.;"ACTIN, CYTOPLASMIC 2."	0.023354	-0.585233	-2.10934
Arhgdia		RHO GDP-DISSOCIATION INHIBITOR 1.	0.02685	-0.150223	-0.176214
Tubb5		TUBULIN BETA-5 CHAIN.	0.0356053	-1.04083	0.673127
Actb		PUTATIVE UNCHARACTERIZED PROTEIN.	0.0378065	-0.0625389	-3.15325
Snx3		SORTING NEXIN 3.;SORTING NEXIN-3.;16 KDA PROTEIN.;15 KDA PROTEIN.	0.0386051	0.125361	-0.083864
Lypla1		ISOFORM 1 OF ACYL-PROTEIN THIOESTERASE 1.;ISOFORM 2 OF ACYL-PROTEIN THIOESTERASE 1.	0.0492702	-0.178093	-0.504169
Tceb2		TRANSCRIPTION ELONGATION FACTOR B POLYPEPTIDE 2.	0.054961	-0.0465737	-0.485406
Hnrph1	Hnrnph1	HETEROGENEOUS NUCLEAR RIBONUCLEOPROTEIN H.;PUTATIVE UNCHARACTERIZED PROTEIN.	0.0582514	0.180694	-0.409663
Ndufs5;BC002163		NADH DEHYDROGENASE [UBIQUINONE] IRON-SULFUR PROTEIN 5.;NADH DEHYDROGENASE (UBIQUINONE) FE-S PROTEIN 5.	0.0624283	0.00583928	-0.482363
4930542G03Rik	Tubb2c	TUBULIN BETA-2C CHAIN.	0.0646876	-0.164045	-0.523223
Ctps		CTP SYNTHASE 1.	0.075847	-0.529469	-3.0527
Anp32b		ISOFORM 2 OF ACIDIC LEUCINE-RICH NUCLEAR PHOSPHOPROTEIN 32 FAMILY MEMBER B.;ISOFORM 1 OF ACIDIC LEUCINE-RICH NUCLEAR PHOSPHOPROTEIN 32 FAMILY MEMBER B.	0.0831075	-0.389904	-0.669742
Dutp	Dut	DEOXYURIDINE TRIPHOSPHATASE ISOFORM 1.;DEOXYURIDINE TRIPHOSPHATASE ISOFORM 2.	0.086447	-0.111621	-0.612591
2610007K22Rik	Ddx17	ISOFORM 1 OF PROBABLE ATP-DEPENDENT RNA HELICASE DDX17.;ISOFORM 2 OF PROBABLE ATP-DEPENDENT RNA HELICASE DDX17.;DEAD BOX POLYPEPTIDE 17 ISOFORM 1.	0.091945	0.266666	0.173145
Atp5a1		ATP SYNTHASE SUBUNIT ALPHA, MITOCHONDRIAL.;55 KDA PROTEIN.	0.0934427	-0.640868	-1.17489
Chchd2;Scand3		COILED-COIL-HELIX-COILED-COIL-HELIX DOMAIN-CONTAINING PROTEIN 2, MITOCHONDRIAL.;SCAN DOMAIN CONTAINING 3.;19 KDA PROTEIN.	0.100294	0.00960247	-0.707344
Rrm2		RIBONUCLEOSIDE-DIPHOSPHATE REDUCTASE SUBUNIT M2.;26 KDA PROTEIN.	0.115517	0.0986874	0.0318188
Hip2	Ube2k	UBIQUITIN-CONJUGATING ENZYME E2 K.;17 KDA PROTEIN.	0.139915	0.0168796	-0.0584525
Ppp2cb;Ppp2ca		SERINE/THREONINE-PROTEIN PHOSPHATASE 2A CATALYTIC SUBUNIT BETA ISOFORM.;SERINE/THREONINE-PROTEIN PHOSPHATASE 2A CATALYTIC SUBUNIT ALPHA ISOFORM.;SERINE/THREONINE PROTEIN PHOSPHATASE.	0.159396	0.142538	-0.373787
D10Wsu52e		UPF0027 PROTEIN C22ORF28 HOMOLOG.	0.162682	-0.723382	0.0319654
Shmt2		SERINE HYDROXYMETHYLTRANSFERASE.	0.172962	-0.343416	-2.45731
Ywhaq		ISOFORM 1 OF 14-3-3 PROTEIN THETA.;ISOFORM 2 OF 14-3-3 PROTEIN THETA.;34 KDA PROTEIN.	0.182426	0.191624	-0.446291
Myl6;Gm5526		ISOFORM SMOOTH MUSCLE OF MYOSIN LIGHT POLYPEPTIDE 6.;ISOFORM NON-MUSCLE OF MYOSIN LIGHT POLYPEPTIDE 6.;SIMILAR TO MYL6 PROTEIN.	0.190083	0.0561629	0.702175
Ndufc2;Ndufc2;LOC675851		PUTATIVE UNCHARACTERIZED PROTEIN.;NADH DEHYDROGENASE [UBIQUINONE] 1 SUBUNIT C2.	0.191023	-0.392503	-1.10252
Cox6b	Cox6b1	CYTOCHROME C OXIDASE SUBUNIT 6B1.	0.194836	-0.209608	-0.214012
Tmpo		ISOFORM ALPHA OF LAMINA-ASSOCIATED POLYPEPTIDE 2, ISOFORMS ALPHA/ZETA.;THYMOPOIETIN ISOFORM ALPHA.	0.198507	0.129952	0.256806
Hnrnpab;Hnrpab		HETEROGENEOUS NUCLEAR RIBONUCLEOPROTEIN A/B.;HETEROGENEOUS NUCLEAR RIBONUCLEOPROTEIN A/B ISOFORM 1.;HNRPAB PROTEIN.	0.199146	0.0619987	-1.22768
Ddx5		PROBABLE ATP-DEPENDENT RNA HELICASE DDX5.	0.199976	0.0598757	-0.258071
Vim		VIMENTIN.	0.207985	-1.26009	0.538798
Api5		PUTATIVE UNCHARACTERIZED PROTEIN.;APOPTOSIS INHIBITOR 5.	0.211086	0.0648776	-1.14691
Tuba6	Tuba1c	TUBULIN ALPHA-1C CHAIN.	0.225577	0.104861	-0.232631
D10Ertd516e	Cand1	CULLIN-ASSOCIATED NEDD8-DISSOCIATED PROTEIN 1.	0.235289	0.0107744	-0.119079
Ywhah		14-3-3 PROTEIN ETA.	0.252566	0.0797987	-0.465662
E430034L04Rik	G3bp2	ISOFORM A OF RAS GTPASE-ACTIVATING PROTEIN-BINDING PROTEIN 2.;ISOFORM B OF RAS GTPASE-ACTIVATING PROTEIN-BINDING PROTEIN 2.	0.259735	0.0402282	-0.875632
Nedd4		E3 UBIQUITIN-PROTEIN LIGASE NEDD4.;NEDD4 PROTEIN.	0.260343	-0.156214	-0.215133
Ndufa4		NADH DEHYDROGENASE [UBIQUINONE] 1 ALPHA SUBCOMPLEX SUBUNIT 4.	0.263393	0.0162172	-0.67879
Sfpq		SPLICING FACTOR, PROLINE- AND GLUTAMINE-RICH.	0.266254	-0.231712	-0.795925
Bat3		LARGE PROLINE-RICH PROTEIN BAT3.	0.266868	-0.0838424	-0.48785
Ndufa2		NADH DEHYDROGENASE [UBIQUINONE] 1 ALPHA SUBCOMPLEX SUBUNIT 2.	0.268545	0.113361	-0.567192
Hnrnpa3;Gm11847		ISOFORM 1 OF HETEROGENEOUS NUCLEAR RIBONUCLEOPROTEIN A3.;ISOFORM 2 OF HETEROGENEOUS NUCLEAR RIBONUCLEOPROTEIN A3.;HETEROGENEOUS NUCLEAR RIBONUCLEOPROTEIN A3.;33 KDA PROTEIN.;"SIMILAR TO HETEROGENEOUS NUCLEAR RIBONUCLEOPROTEIN A3, ISOFORM 16."	0.27714	-0.169723	-0.550481
Lgals1		GALECTIN-1.	0.282063	-0.168547	-0.586649
Sdha		SUCCINATE DEHYDROGENASE [UBIQUINONE] FLAVOPROTEIN SUBUNIT, MITOCHONDRIAL.	0.290403	-0.125092	-1.21488
Hist2h3b;Hist1h3d;Hist1h3e;Hist1h3b;Hist1h3c;Hist1h3f;Hist2h3c1;Hist2h3c2		HISTONE H3.2.;"HISTONE CLUSTER 2, H3C1."	0.296638	0.0679689	0.203659
Hist1h3h;Hist1h3i;Hist1h3a;Hist1h3g		HISTONE H3.1.	0.296638	-0.147749	-0.0613629
Cmpk1		UMP-CMP KINASE 1.	0.302581	-0.0552852	-0.456908
D11Wsu68e	Vps25	ISOFORM 1 OF VACUOLAR PROTEIN-SORTING-ASSOCIATED PROTEIN 25.;ISOFORM 2 OF VACUOLAR PROTEIN-SORTING-ASSOCIATED PROTEIN 25.;VACUOLAR PROTEIN SORTING 25.	0.306739	-0.136822	-0.758146
B2m		BETA-2-MICROGLOBULIN.;BETA-2-MICROGLOBULIN PRECURSOR.	0.315784	-0.0476116	0.375203
Cfl1		COFILIN-1.	0.321753	-0.0998185	-0.870671
2410011G03Rik	Ndufa12	NADH DEHYDROGENASE (UBIQUINONE) 1 ALPHA SUBCOMPLEX, 12.	0.324905	0.100275	-2.56554
Hnrpa2b1	Hnrnpa2b1	ISOFORM 3 OF HETEROGENEOUS NUCLEAR RIBONUCLEOPROTEINS A2/B1.;ISOFORM 2 OF HETEROGENEOUS NUCLEAR RIBONUCLEOPROTEINS A2/B1.;ISOFORM 1 OF HETEROGENEOUS NUCLEAR RIBONUCLEOPROTEINS A2/B1.;HETEROGENEOUS NUCLEAR RIBONUCLEOPROTEIN A2/B1.	0.335384	-0.122488	-1.17738
Atp5o;LOC100047429		ATP SYNTHASE SUBUNIT O, MITOCHONDRIAL.	0.343853	-0.45738	-0.797672
Kif5b		KINESIN-1 HEAVY CHAIN.;KINESIN FAMILY MEMBER 5B.	0.356116	0.192206	-0.651999
Crip1		CYSTEINE-RICH PROTEIN 1.	0.364856	-0.185368	-2.01468
Mela		GAG-POL POLYPROTEIN.;GAG PROTEIN.	0.366279	-0.019124	-0.161389
Hrsp12		RIBONUCLEASE UK114.	0.3701	-0.214059	-0.674515
Sh3bgrl3		SH3 DOMAIN-BINDING GLUTAMIC ACID-RICH-LIKE PROTEIN 3.	0.371922	-0.00827043	-0.436943
Myh9		MYOSIN-9.	0.373279	-0.105172	-0.148588
Mcm5		MINICHROMOSOME MAINTENANCE DEFICIENT 5, CELL DIVISION CYCLE 46.	0.379078	-0.31291	-0.9941
Psmb10		PROTEASOME SUBUNIT BETA TYPE-10.	0.394864	-0.0756575	-0.664636
Lnpep		LEUCYL-CYSTINYL AMINOPEPTIDASE.	0.42936	0.0979633	-0.709813
Ptbp1		PUTATIVE UNCHARACTERIZED PROTEIN.;POLYPYRIMIDINE TRACT BINDING PROTEIN 1 ISOFORM 1.;POLYPYRIMIDINE TRACT-BINDING PROTEIN 1.	0.432119	-0.148588	-0.485732
Gm15387;Hmgb1;LOC637733		HIGH MOBILITY GROUP PROTEIN B1.;25 KDA PROTEIN.;SIMILAR TO HIGH-MOBILITY GROUP BOX 1.	0.438858	-0.128224	-0.224723
Dnm1l		ISOFORM 2 OF DYNAMIN-1-LIKE PROTEIN.;ISOFORM 1 OF DYNAMIN-1-LIKE PROTEIN.;ISOFORM 3 OF DYNAMIN-1-LIKE PROTEIN.;ISOFORM 4 OF DYNAMIN-1-LIKE PROTEIN.;DYNAMIN 1-LIKE ISOFORM A.	0.463109	0.0293763	-0.676792
Hmgb2		HIGH MOBILITY GROUP PROTEIN B2.	0.464637	-0.0564937	0.0855371
Calm2;Calm3;Calm1		PUTATIVE UNCHARACTERIZED PROTEIN.;CALMODULIN.	0.482957	0.0977645	0.808706
Rap1a;LOC100048397;Rap1b		RAS-RELATED PROTEIN RAP-1A.;RAS-RELATED PROTEIN RAP-1B.	0.491674	0.147815	-0.533816
Smc2l1	Smc2	PUTATIVE UNCHARACTERIZED PROTEIN.;STRUCTURAL MAINTENANCE OF CHROMOSOMES PROTEIN 2.	0.500282	0.245581	0.0254269
Aco2		ACONITATE HYDRATASE, MITOCHONDRIAL.	0.51542	-0.0425375	-0.470006
H2afx		HISTONE H2A.X.	0.521506	0.0775137	1.12891
Lmnb1		LAMIN-B1.	0.530719	0.0641451	-0.451052
Dbi		DIAZEPAM BINDING INHIBITOR ISOFORM 1.;ACYL-COA-BINDING PROTEIN.;PROTEIN.;7 KDA PROTEIN.	0.531967	0.101807	0.508029
H2afz;H2afv		HISTONE H2A.Z.;14 KDA PROTEIN.;HISTONE H2A.V.	0.541952	0.16488	1.02141
Ftl1		FERRITIN LIGHT CHAIN 1.	0.547253	0.065448	0.694199
Psme3		PROTEASOME ACTIVATOR COMPLEX SUBUNIT 3.;"PROTEASEOME (PROSOME, MACROPAIN) 28 SUBUNIT, 3."	0.547468	0.0337195	-1.84408
RP23-38E20.1;Hist1h2be;Hist1h2bg;LOC665622;Hist1h2bc;Hist1h2bk;Hist1h2bh		HISTONE H2B.;HISTONE H2B TYPE 1-K.;15 KDA PROTEIN.;14 KDA PROTEIN.	0.548299	0.00300982	0.512892
Hist3h2bb;Hist3h2ba		HISTONE CLUSTER 3, H2BB.;HISTONE H2B TYPE 3-A.	0.548299	-0.270413	-0.0866392
Hist2h2bb;Hist1h2bp		HIST2H2BB PROTEIN.;16 KDA PROTEIN.	0.548299	0.230692	2.13323
Hist1h2bn;Hist1h2bj;Hist1h2bf;Hist1h2bl;LOC100046213;Hist1h2bh;RP23-38E20.1;Hist1h2be;Hist1h2bg;LOC665622;Hist1h2bc;Hist1h2bm;Hist2h2bb;Hist1h2bb;Hist1h2bp		HISTONE H2B TYPE 1-F/J/L.;HISTONE H2B TYPE 1-H.;HISTONE H2B TYPE 1-C/E/G.;HISTONE H2B TYPE 1-M.;HISTONE H2B TYPE 2-B.;HISTONE H2B TYPE 1-B.;ISOFORM 1 OF HISTONE H2B TYPE 1-P.;ISOFORM 2 OF HISTONE H2B TYPE 1-P.;15 KDA PROTEIN.;14 KDA PROTEIN.	0.548299	-0.0847388	-0.0199519
Hist1h4d;Hist1h4i;Hist1h4h;Hist2h4;Hist1h4c;Hist1h4m;Hist1h4j;Hist4h4;Hist1h4a;Hist1h4b;Hist1h4k;Gm11275;Hist1h4f		11 KDA PROTEIN.;HISTONE H4.;12 KDA PROTEIN.	0.555966	-0.103163	-0.256979
Ddt		D-DOPACHROME DECARBOXYLASE.	0.624799	-0.215451	0.0106565
Spna2		ISOFORM 2 OF SPECTRIN ALPHA CHAIN, BRAIN.;"ISOFORM 1 OF SPECTRIN ALPHA CHAIN, BRAIN.";SPECTRIN ALPHA 2.	0.640234	0.184947	0.307598
Arhgdib		RHO GDP-DISSOCIATION INHIBITOR 2.	0.641339	-0.176659	-1.54792
Ppp1cc;Ppp1ca		ISOFORM GAMMA-1 OF SERINE/THREONINE-PROTEIN PHOSPHATASE PP1-GAMMA CATALYTIC SUBUNIT.;SERINE/THREONINE-PROTEIN PHOSPHATASE PP1-ALPHA CATALYTIC SUBUNIT.;ISOFORM GAMMA-2 OF SERINE/THREONINE-PROTEIN PHOSPHATASE PP1-GAMMA CATALYTIC SUBUNIT.;SERINE/THREONINE PROTEIN PHOSPHATASE (FRAGMENT).	0.711825	0.187526	-0.364571
Anp32e		ISOFORM 1 OF ACIDIC LEUCINE-RICH NUCLEAR PHOSPHOPROTEIN 32 FAMILY MEMBER E.;ISOFORM 2 OF ACIDIC LEUCINE-RICH NUCLEAR PHOSPHOPROTEIN 32 FAMILY MEMBER E.	0.715873	-0.00539228	0.112828
Anp32a		ACIDIC LEUCINE-RICH NUCLEAR PHOSPHOPROTEIN 32 FAMILY MEMBER A.;PROTEIN.;27 KDA PROTEIN.;23 KDA PROTEIN.	0.720224	0.290168	0.00128778
Mdh1		MALATE DEHYDROGENASE, CYTOPLASMIC.	0.755585	-0.172078	-0.169237
Sh3bgrl		SH3 DOMAIN-BINDING GLUTAMIC ACID-RICH-LIKE PROTEIN.	0.762412	0.0351621	0.428168
Numa1		NUCLEAR MITOTIC APPARATUS PROTEIN 1.	0.765674	0.116707	0.716289
Mki67		KI-67 PROTEIN.	0.775041	0.159052	0.64611
2810406C15Rik	Ncapd2	ISOFORM 2 OF CONDENSIN COMPLEX SUBUNIT 1.;ISOFORM 1 OF CONDENSIN COMPLEX SUBUNIT 1.	0.798198	-0.0485767	0.957437
Fth1		FERRITIN HEAVY CHAIN.	0.801118	-0.736353	-1.69728
Acyp1		ACYLPHOSPHATASE-1.;ACYLPHOSPHATASE.	0.847483	0.263444	0.653082
Mcm6		DNA REPLICATION LICENSING FACTOR MCM6.	0.872892	0.084216	-0.0821775
Spnb2		ISOFORM 1 OF SPECTRIN BETA CHAIN, BRAIN 1.	1.00428	0.230421	0.499127
LOC100048622;1500003O03Rik;1500003O03Rik		CALCIUM-BINDING PROTEIN P22.;NOVEL PROTEIN.	1.14809	-0.197133	0.243064
Atp1b3		SODIUM/POTASSIUM-TRANSPORTING ATPASE SUBUNIT BETA-3.	1.37587	0.0253649	0.470519
Cat		CATALASE.	1.70304	0.0586287	-0.602836
