# Supplementary material for: Extensive Gene-Specific Translational Reprogramming in a Model of B Cell Differentiation and Abl-Dependent Transformation
Source: PLoS One. 2012 May 31;7(5):e37108. doi: 10.1371/journal.pone.0037108 (PMC3365017; doi:10.1371/journal.pone.0037108)
Supplement: Table S2 — Genes translationally activated by imatinib. Genes are listed in order of SAM score starting with the most significantly imatinib-regulated gene. Values are given for individual oligos on the array, therefore some genes are represented more than once. Genes with multiple oligos for which the standard deviation between the oligos was more than half the average difference from the mean were assigned footnotes to categorize the nature of the discrepancy between oligos (ie. plausibly due to splice variation, or alternative polyadenylation, etc.). Those genes with discordant oligos that could not be explained by the above criteria (footnote 4) were removed from the bioinformatic functional analyses. The columns indicate the following from left to right: Gene symbol from master dataset, alternate names where MEEBO master dataset gene symbols are absent or possibly misleading, footnote corresponding to the nature of the discrepancy in cases where multiple oligos representing one gene are discordant, accession number, description of the protein product, the Log2 ratio of average ribosome number of imatinib-treated to untreated lysate, SAM score, FDR (%), the same for changes in mRNA abundance (Log ratio, SAM, FDR (%)), changes in average ribosome number upon rapamycin treatment (Log ratio, SAM, FDR (%)), and rapamycin-induced changes in mRNA abundance (Log ratio, SAM, FDR (%)), sequence of the oligo probe on the array. (XLS) [file pone.0037108.s005.xls]

## Sheet: Table S2. NewUptable.txt
Table S2. Genes represented by oligos with significant induction of translation upon Imatinib treatment (<10%FDR, SAM) ordered from most to least change by SAM score.
					Imatinib Translation			Imatinib mRNA Abundance			Rapamycin Translation			Rapamycin Abundance
Gene.Symbol	alternate name	footnote	Accession	product	Change(Log2)	SAM.Score	SAM.FDR	Change(Log2)	SAM.Score	SAM.FDR	Change(Log2)	SAM.Score	SAM.FDR	Change(Log2)	SAM.Score	SAM.FDR	probe sequence
Elf2			NM_023502	Mus musculus E74-like factor 2 (Elf2), mRNA.	0.97	6.95	2.24	0.46	0.26	35.83	0.28	1.04	47.73	0.23	0.31	73.94	GACCCAGCAGTCACCAGTTTCCAATGGGTCTCCTGAGTTAGGAATCAAGAAGAAAGCCAGAGAAGGAAAA
Gatad2a			NM_145596	cDNA sequence BC031407	0.52	4.46	0.67	-0.53	-0.13	55.94	0	0.67	62.6	-0.3	-0.7	27.88	GTGATACCCAAGTTGCTCAGTGCTTTTGAGTGTGTCACTTCCCAGGGTGGTTTTGGGGGAATTAACAGAA
Cux1	Cutl1	3	NM_009986	Mus musculus cut-like 1 (Drosophila) (Cutl1), transcript variant 1, mRNA.	0.65	4.36	0.57	0.02	0.08	54.81	NA	NA	NA	0.09	0.04	85.36	CATACCCATCACCAAAAACCATCGAGGAACTTGCCACACAACTCAACCTGAAGACCAGCACCGTCATCAA
Azin1			AK088671	Mus musculus 2 days neonate thymus thymic cells cDNA, RIKEN full-length enriched library, clone:E430023D20 product:ornithine decarboxylase antizyme inhibitor, full insert sequence.	0.45	4.12	0.35	-0.37	-0.07	59.12	NA	NA	NA	-0.44	-1.07	6.95	TATGAAAGATGTATCAGTTTCTTCTGAAGTGCAATCAACTCTCTAGACGCCTTTGTAGCAGGTGTGGACC
Setd8			NM_030241	RIKEN cDNA 2410195B05 gene	0.62	4.04	0.29	-1.02	-0.32	35.73	0.04	0.95	51.16	-0.38	-0.79	20.81	ACACACTGTCGTGTATGAATATTTTTTAGCAAAAGTTTCACAGTAAGCTAGTCTTCCCCTCTGCTTTCTC
Enox2	Cova1		NM_145951	Mus musculus cytosolic ovarian carcinoma antigen 1 (Cova1), mRNA.	0.39	3.83	0.2	0.49	0.26	35.89	NA	NA	NA	0.5	0.73	32.94	TGGTTCCAGAAGGCCTCATTGAGAATGGAGGGGAATCAAGCAAGAAAAGAAAGAGAACAAATCCTCCTTC
Rmnd5a			NM_024288	RIKEN cDNA 1110007A06 gene	0.49	3.74	0.19	0.37	0.23	39.77	0.12	1.67	36.64	0.44	0.61	44.79	AAAGGCGTCGTGCCAGGCAGTATCCTGTGGAGGGAGGAGGGTGTACGTTCGTTTACTATGGATAGTTTTT
Tulp4			NM_054040	tubby like protein 4	0.47	3.7	0.19	3.28	1.26	0	0.06	1.38	39.08	1.65	0.77	29.01	CAGCATTTTGCTTTAACCTTCCAGACAAGATCTGTTGAGAGTCACCATTGCATCTCAATGAGCTCTCCCT
5830457O10Rik			NM_145412	Mus musculus RIKEN cDNA 5830457O10 gene (5830457O10Rik), mRNA.	0.66	3.61	0.22	-0.77	-0.22	47.75	0.49	2.95	39.67	-0.31	-0.66	31.25	GGGAGATCGAGGCTCGCTACAGCACCGGATTAGCTGGAAACCTCCTGGGAGACCTACATTACACCACTGA
Cyfip2			NM_133769	cytoplasmic FMR1 interacting protein 2	0.64	3.59	0.23	NA	NA	NA	-0.23	-0.65	79.57	NA	NA	NA	ACAATGAGGTTTTTGCCATCCTGAACAAGTACATGAAGTCTGTAGAGACAGACAGTTCCACCGTAGAGCA
Cyfip2			NM_133769	cytoplasmic FMR1 interacting protein 2	0.48	3.55	0.26	3.88	1.5	0	-0.26	-1.98	13.32	-0.12	-0.31	65.88	TTGATTTGTATTTTGGGGGTACCTGTGTTGAGTCGATAAAACATTTTCATCTCCATTAAAACTGCTTCCA
Clk4			NM_007714	Mus musculus CDC like kinase 4 (Clk4), mRNA.	0.39	3.53	0.27	0.96	0.46	14.03	-0.04	0.38	75.56	0.41	0.64	41.39	AAAGATCCAGGAGTATAGAGGATGATGAGGAGGGTCACCTGATCTGTCAAAGTGGAGACGTTCTAAGAGC
Rnf167			NM_027445	Mus musculus RIKEN cDNA 5730408C10 gene (5730408C10Rik), mRNA.	0.41	3.44	0.38	0.61	0.3	31.26	0.08	1.47	37.83	0.32	0.35	70.37	ACCACCCTCAGCCCCGGTCAATGGGTCAGTCTTTATTGCACTGCTTCGAAGATTCGACTGCAACTTTGAC
Pbrm1			BC025605	Mus musculus RIKEN cDNA 2610016F04 gene, mRNA (cDNA clone IMAGE:5250197), partial cds.	0.65	3.37	0.49	0.44	0.24	38.67	NA	NA	NA	0.19	0.18	82.32	AGGCCTTCCACCTTTGCAGGGCCCAGTTGATGGCCTTGTTAGCATGGGCAGCATGCAGCCACTTCACCCT
BC031748			NM_146261	cDNA sequence BC031748	0.46	3.36	0.5	-0.68	-0.19	51.05	NA	NA	NA	-0.28	-0.67	30.71	AACTGAGGGTAAAAATTAGTACCTTGCAGCATTGCTGAGGCCTGTGGTTGGGCTTTAACTTTCGAATGCC
Fbxl10			mSQ022879	F-box and leucine-rich repeat protein 10	0.47	3.28	0.67	-0.23	-0.01	59.47	0.01	0.83	55.58	-0.01	-0.14	79.6	TGCCCCTGGATGATGGAGCAGCCCACGTCATGCATAGGGAGGTGTGGATGGCAGTCTTCAGCTACCTCAG
Rnf167			NM_027445	ring finger protein 167	0.41	3.28	0.66	0.86	0.38	21.65	0.09	1.66	36.65	0.62	0.72	34.11	GAAGGCTGGGTATGGTGCAGCTGTGGTGCACAATGTGAATTCCAATGAACTGCTGAACATGGTGTGGAAC
1700027N10Rik			NM_029338	RIKEN cDNA 1700027N10 gene	0.31	3.27	0.69	1.89	0.82	0	-0.04	0.52	69.6	-0.31	-0.68	30.07	CACCTTCTACCACGCTCCTCGCACCAAGAACTATGGCTACATCTACGTAGGCACAGGAGAGAAGAACATG
bsid(994345)	Glcci1		mSQ035616	Mus musculus glucocorticoid induced transcript 1 (Glcci1), mRNA.	0.38	3.27	0.68	NA	NA	NA	-0.12	-0.34	89.72	NA	NA	NA	CAAAGTACTTAGCATCACAAAATAGCTATTAACACTGATCTTGGCAGGGACCGACTTATATTCAGCAGTT
Add1			NM_013457	Mus musculus adducin 1 (alpha) (Add1), mRNA.	0.46	3.25	0.75	0.13	0.12	51.52	NA	NA	NA	-0.16	-0.32	64.73	AGGCCTGCTGGCATTGCAGCAGATTGCAGATTTCATGACTGCGAGTGTACCAAATGTCTACCCGGCAGCT
Rassf5	Rapl		AY261333	Mus musculus Rap1-binding protein (Rapl) mRNA, complete cds.	0.58	3.24	0.77	0.06	0.1	53.66	NA	NA	NA	NA	NA	NA	AAACAGCCCCTGCCCTGCGGTCCGATGAGCTCAGACTCGGGCGGGGCCCAATGACCGTGGACAGCAGCAT
Rmnd5a			NM_024288	RIKEN cDNA 1110007A06 gene	0.45	3.22	0.83	0.36	0.22	40.32	0.05	0.97	50.18	0.22	0.31	74	AAAGGCGTCGTGCCAGGCAGTATCCTGTGGAGGGAGGAGGGTGTACGTTCGTTTACTATGGATAGTTTTT
Ptpn12			NM_011203	Mus musculus protein tyrosine phosphatase, non-receptor type 12 (Ptpn12), mRNA.	0.7	3.21	0.85	0.12	0.12	51.73	NA	NA	NA	-0.34	-0.59	37.92	AAAGTGTGAGCGCTACTGGCCTTTGTATGGAGAAGATCCTATAACATTTGCACCATTTAAAATTTCTTGT
Cux1	Cutl1	3	NM_009986	cut-like 1 (Drosophila)	0.5	3.2	0.87	0.07	0.11	52.79	0	0.29	79.6	1.4	0.82	25.55	GCGGGCCACAGGGCAAAATCGCCATAGGCCAAGGTGCATATAGAAAACAAAGGAGCATTAAGCCCAATCT
Fbxl10			mSQ030514	F-box and leucine-rich repeat protein 10	0.48	3.2	0.86	-0.41	-0.09	58.49	0.05	1.04	47.77	-0.21	-0.61	35.67	AACCGCTGCAAGTCCATCACACCCCTGATGCTGAGCGGTATCATCCGGCGACAGCCTGTCTCCCTTGACC
bsid(920593)	Sgk3	4	NM_133220	Mus musculus serum/glucocorticoid regulated kinase 3 (Sgk3), mRNA.	0.46	3.19	0.9	-1.22	-0.4	25.82	NA	NA	NA	-0.59	-1.35	1.49	TTAAACAAAGAAGAGCAGGATTGAATGAGTTCATTCAGAACTTGGTCAGATATCCAGAGCTTTACAACCA
Rfwd3			NM_146218	cDNA sequence BC027246	0.56	3.19	0.91	-0.28	-0.03	59.62	0.22	1.09	46.33	-0.12	-0.41	55.44	GTCATATTTACCCAAAGCTGCAGTGGCTGCATTTCCTTATGGTGGGGTGCTGGCTGGAACATTGGAGAAT
Mospd1			NM_027409	motile sperm domain containing 1	0.36	3.16	1.01	1.48	0.65	2.34	NA	NA	NA	-0.43	-0.88	15.57	TGGAGACTCTGACAAAGGAGCAGGGAGCAGTCGAGCTGCTTTCCGAGGAGCCAGTGTTGCTGAGATTGCC
Mcm4		1	NM_008565	Mus musculus minichromosome maintenance deficient 4 homolog (S. cerevisiae) (Mcm4), mRNA.	0.43	3.13	1.1	-0.22	-0.01	59.41	NA	NA	NA	NA	NA	NA	TAACCCGGATCCGAGGTACGAGAGGTCCCGGAGCGGGACAACTGAGAGCCAGATTTCTTTTGTCGCGCAG
E030004N02Rik			mSQ011746	RIKEN cDNA E030004N02 gene	0.3	3.12	1.14	2.74	1.08	0	-0.03	0.45	72.76	0.87	1.11	8.47	GCGCATCATTGTACAAGTTCTTACGCTTGGCCTTATTTTTTTCCTAAGTGATTGTGGTTTTTCTTGTGGT
Sbno1		1	AK077133	Mus musculus adult male testis cDNA, RIKEN full-length enriched library, clone:4933409M12 product:CDNA FLJ10833 FIS, CLONE NT2RP4001206, MODERATELY SIMILAR TO DROSOPHILA MELANOGASTER STRAWBERRY NOTCH MRNA (FRAGMENT) homolog [Homo sapiens], full insert sequence.	0.41	3.12	1.12	-0.41	-0.08	58.77	NA	NA	NA	NA	NA	NA	TTGGAGACAGAAGCAGCAGTTCCTGTCAAACAAGAGCCAGAGCCGATGTCCACTCCCGCACTGTTAAATG
Gtpbp10			BC034507	Mus musculus cDNA sequence BC034507, mRNA (cDNA clone MGC:30495 IMAGE:4222393), complete cds.	0.39	3.11	1.16	-1.16	-0.38	28.08	0.16	1.46	37.95	-0.49	-1.15	4.65	AAGGGAAAGGACTGTGAAGTGCCTGCTCCTGTGGGTATCTCAGTAACTGATGAAAACGGCCAAGTGCTAG
Stk4			NM_021420	serine/threonine kinase 4	0.37	3.08	1.29	0.62	0.23	39.82	-0.06	0.16	84.25	-0.55	-0.38	59.09	GCTGTCCTTTATTCTGGGGGAAGTTTTTCCAGCTCAAACTACACCCTCACCCTCACCACCCTTTTTAAAG
Atrx		2	NM_009530	alpha thalassemia/mental retardation syndrome X-linked homolog (human)	0.34	3.04	1.43	0.46	0.25	37.2	-0.03	0.16	84.18	0.42	0.56	49.73	GAGGAGATTGGTCCTTTTTCTAAAGGCATAAAGCAAAGTAAAACTGACACAGCTGGTGGAGAAAAGAAAG
Depdc1a	Depdc1		NM_029523	Mus musculus DEP domain containing 1 (Depdc1), mRNA.	0.44	3.04	1.43	-0.68	-0.18	51.63	0.21	1.2	43.2	-0.56	-1.04	7.99	GATTCTACTAAAAGACTACAAAGAAATGATCAAGGATTTCAAGAAAGATGTGCCAAGAAAATGCAGCTAG
Spg3a			NM_178628	spastic paraplegia 3A homolog (human)	0.69	3.04	1.44	0.83	0.4	19.92	-0.2	-0.14	90.5	0.46	0.61	44.1	CATTTGGTACACCACAAATGTATTCTTCATAGGTTTATTCTTTTAATATGTGAACTATTAAACTTTACTG
Ptpn12			NM_011203	Mus musculus protein tyrosine phosphatase, non-receptor type 12 (Ptpn12), mRNA.	0.66	3.02	1.52	0	0.08	55.42	NA	NA	NA	-0.37	-0.72	26.24	AAAAGCATATGTGGCAACCCAAGGGCCTTTGGCGAATACAGTCATAGACTTCTGGAGGATGATATGGGAG
Tcf12			NM_011544	transcription factor 12	0.61	3.02	1.55	2.27	0.95	0	0.02	0.85	54.9	-0.2	-0.43	53.86	AGACACCATCTGTGACCATAGCCTAGCTAATATTTTGAAAGGGGAAGTTTTGTCCCCTGGATTTGCCCCC
Wdr37		2	NM_172445	WD repeat domain 37	0.35	3.02	1.56	-0.13	0.03	58.25	0.2	1.23	42.22	-0.28	-0.69	28.99	CTGCCGTCCTCAGTTCGCAGTACACTGCTGGAATTGTTTGGCCAGATAGAAAGAGAATTTGAAAATCTTT
Larp5	D13Wsu64e		NM_172585	DNA segment, Chr 13, Wayne State University 64, expressed	0.37	2.97	1.75	-0.57	-0.15	54.87	NA	NA	NA	-0.44	-1.04	7.79	GAGAAAGCCCAGTTATGCAGAGATTTGTCAGAGAACGAGTAAAGACCCTTCTTCCTCCTCTCCATTGCAA
Dnajb4			NM_025926	Mus musculus DnaJ (Hsp40) homolog, subfamily B, member 4 (Dnajb4), mRNA.	0.44	2.96	1.84	1.13	0.5	10.41	-0.06	0.31	78.65	0.09	0.03	85.31	GTTCCTCATGCTATGCACCTTACATAATTTCCCTAAAGAACAGTCATCTATCACTGTGGTGTTAAACCGC
2810049L19Rik			mSQ030885	RIKEN cDNA 2810049L19 gene	0.52	2.94	1.92	0.33	0.21	41.92	0.21	1.71	36.66	0.16	0.19	82.06	GCTTTTTACAGTATAAACGTCATGAAACAGCTCATTGGTTCGTCTAACTTATTTGTGATGCAAGTGGAGA
Nr3c1			NM_008173	nuclear receptor subfamily 3, group C, member 1	0.55	2.94	1.94	0.5	0.27	34.43	NA	NA	NA	NA	NA	NA	GCTAGGAAAAGCCATTGTCAAAAGGGAAGGAAACTCCAGTCAGAATTGGCAGCGGTTTTATCAACTGACA
9330180L21Rik			NM_175254	RIKEN cDNA 9330180L21 gene	0.36	2.93	1.96	1.07	0.5	10.37	0.01	0.59	66.39	0.17	0.19	81.66	GTTTTACTCATGAACTTCGATGATTGCTTTGTATGAGAATGTATGTACTTGGGGAATTTGAATTTATTCT
Foxp1			NM_053202	forkhead box P1	0.37	2.93	1.98	NA	NA	NA	0.03	0.66	62.89	0.83	0.71	34.32	ATCAGTGGTAACCCTTCCCTTATTAAAAACATGCAGAGCAGCCACGCCTACTGCACACCTCTCAATGCAG
Hnrnpr	Hnrpr	1	NM_028871	Mus musculus heterogeneous nuclear ribonucleoprotein R (Hnrpr), mRNA.	0.48	2.93	1.99	-0.31	-0.04	59.57	NA	NA	NA	-0.33	-0.76	23.06	TAATAAAATGGCTAATCAGGTGAATGGTAATGCGGTACAGTTAAAAGAAGAGGAAGAACCAATGGATACT
Hnrnpr	Hnrpr	1	NM_028871	heterogeneous nuclear ribonucleoprotein R	0.5	2.92	2.02	-0.32	-0.05	59.54	NA	NA	NA	-0.32	-0.74	24.7	TGGCTAATCAGGTGAATGGTAATGCGGTACAGTTAAAAGAAGAGGAAGAACCAATGGATACTTCCAGTGT
Rnf167			NM_027445	Mus musculus RIKEN cDNA 5730408C10 gene (5730408C10Rik), mRNA.	0.39	2.9	2.12	0.77	0.38	21.83	0.12	1.6	36.8	0.72	1.22	5.06	ACTTCGGAGCACAATGCCAGCATGGACTTTGCAGACCTTCCAGCTCTGTTTGGGGCCACTCTGAGCGACG
Mtmr2			NM_023858	Mtmr2 protein.	0.77	2.89	2.22	-0.39	-0.07	58.94	0.5	1.29	40.91	-0.49	-0.97	10.88	ATTCACTGGTGCTGTGCGAGGAACGCTGACTGTCACAAGTTACAGGTTATATTTCAAGAGCATGGAGCGG
Vps41		1	NM_172120	Mus musculus vacuolar protein sorting 41 (yeast) (Vps41), mRNA.	0.51	2.88	2.26	0.52	0.28	33.57	0.19	1.14	44.75	0.05	-0.04	83.9	CCTGTGAAGATAAACCAAATTAGCTTGGATGACAGTGGAGAACACATGGGAGTGTGTTCAGAGGATGGCA
Mll5			AK021284	Mus musculus 12 days embryo eyeball cDNA, RIKEN full-length enriched library, clone:D230038D11 product:hypothetical SET-domain of transcriptional regulators (TRX, EZ, ASH1 etc) containing protein, full insert sequence.	0.31	2.87	2.33	0.7	0.35	24.76	NA	NA	NA	0.16	0.17	82.55	CGCAGGGGGCCGAGTCGGAGATCGAGCCTGCGTTCGGGAGCGGCAGCAGAGGGGGCATAGACACTCGGAG
Myb			NM_010848	Mus musculus myeloblastosis oncogene (Myb), mRNA.	0.5	2.86	2.37	0.74	0.37	22.81	NA	NA	NA	-0.24	-0.54	42.36	TGAGAAGCTGAAGAAGCTGGTGGAACAGAACGGAACAGACGACTGGAAAGTCATTGCCAATTATCTGCCC
Znf24			mSQ020100	hypothetical protein Znf24	0.45	2.86	2.37	0	0.08	55.49	NA	NA	NA	NA	NA	NA	TTTTTCTTGTGAAATTTATATTCTCTTTTTTTCTCTCCAGGTAATGAGCTACCTGGTTCTTTGTCCCTTT
Dmtf1		1	NM_011806	Mus musculus cyclin D binding myb-like transcription factor 1 (Dmtf1), mRNA.	0.54	2.84	2.53	0.14	0.13	50.66	NA	NA	NA	-0.12	-0.32	64.73	AGCTGTAGCTGAAAGAGTGGGTACCCGCTCAGAAAAGCAATGCCGTTCTAAATGGCTCAACTACCTGAAC
Rfwd3			NM_146218	cDNA sequence BC027246	0.55	2.82	2.65	0.16	0.14	49.59	0.09	0.94	51.53	0.02	-0.11	81.36	TCCTTGGAGCCAGGGGGCTTTGTAGACTTTCAGACAGAGAGCAGCACCCGACACTGTCTTGTGACTTACA
Bcl6			NM_009744	B-cell leukemia/lymphoma 6	0.32	2.79	2.82	3.95	1.56	0	-0.06	0.18	83.57	0.18	0.17	82.76	TCTTTGGGAATGTTTGACTCCTCCCACATTCTGCGTCATGCTTGTCGTTATAATTACTCCGGAGACAGGG
Afmid			NM_027827	Mus musculus arylformamidase (Afmid), mRNA.	0.3	2.78	2.94	1.21	0.55	7.05	0.02	0.9	53.01	0.23	0.29	75.6	CAGCAGCTGCGTGGTGTGGATCACTTTGACATCATAGAGAATCTGACCCGGGAGGATGACGTGCTCACCC
Grk5	Gprk5		NM_018869	G protein-coupled receptor kinase 5	0.42	2.78	2.93	-0.43	-0.09	58.52	0.23	1.37	39.25	-0.24	-0.49	47.91	GCACTATGCCTGGTTCTGACCATTATGAATGGTGGTGACCTGAAGTTTCACATCTACAATATGGGGAATC
Zfp336			NM_028986	zinc finger protein 336	0.31	2.77	2.96	0.98	0.44	15.75	-0.07	0.26	80.72	-0.01	-0.13	80.18	ACTAGAGGGGACCAGAAGCCTTGGTATGCTCAACTTCTATGCCTTAACAAGCGGATCATAAGGAACCAGG
Eif2s1			NM_026114	eukaryotic translation initiation factor 2, subunit 1 alpha	0.43	2.75	3.11	-1.21	-0.4	25.49	0.15	0.99	49.62	-0.59	-1.32	1.72	CCTTGTGTGACCCATTTCCGAGGAGCCATGCTTGCTAGTCTGCATACCATGTTGCTAGTATTTAGGGACT
9130203F04Rik			mSQ015521	RIKEN cDNA 9130203F04 gene	0.28	2.74	3.2	2.11	0.89	0	-0.14	-0.33	89.81	0.31	0.42	63.65	TGGCTGTTTAAATCTTTGTTACCTTCGCTGTGAATTGAAATTGTACATATTTAGTAAATCATGCAAACAA
5830457O10Rik			NM_145412	RIKEN cDNA 5830457O10 gene	0.6	2.73	3.26	-0.79	-0.23	46.1	NA	NA	NA	-0.24	-0.61	35.81	TCCTGGACCAAGTCCAAATCTGAGATCAAGCTTTTTAGGTACAAACCCGGCCCCTAGGTCGGGTATGTTT
Foxn3	Ches1		NM_183186	checkpoint supressor 1	0.29	2.72	3.38	2.63	1.09	0	0	0.81	56.55	0.86	1.48	1.27	CAGCTACATCAACTTTTTATTTTTACTACTCTGATTCTGTAACACTTCTGAGTTTTGTTGTAATTTTACA
Sfmbt1		4	NM_019460	Scm-like with four mbt domains 1	0.32	2.72	3.37	0.42	0.25	37.17	0.05	1.16	44.23	-0.3	-0.8	20.11	TTATCAACGCAGCATACAAACCCAGCCGCGTCCTCCGTGAGCTCCAGCTGGACAAAGACTCTGTGTGGCA
Slmap			NM_032008	Mus musculus sarcolemma associated protein (Slmap), mRNA.	0.71	2.71	3.46	-0.04	0.06	56.47	NA	NA	NA	-0.09	-0.26	70.48	GAGGCCAAACAAGACATTCAGCATCTTCGCAAAGAATTGGTGGAAGCCCAGGAGCTAGCTAGAACAAGTA
Cnp1			NM_009923	cyclic nucleotide phosphodiesterase 1	0.38	2.7	3.52	1.79	0.78	0	-0.09	-0.13	90.45	0.39	0.54	51.31	AAGGGCAAACCTGTGCCCATACATGGCAGCCGGAAGGGGGGTGCCATGCAGATCTGCACCATCATCTGAG
bsid(972758)	2310061I09Rik/Ccdc115/Ccp1	1	XM_129811	RIKEN cDNA 2310061I09 gene	0.44	2.68	3.7	-1.37	-0.46	19.26	0.12	1.38	39.19	-0.64	-1.33	1.7	GCTGGGCCATGGCGGTCCAGGCTCTGCGAGAGGAGTTGGACTCCAAGTGCCTACAGCTGCTCAGTGACCT
Esr1			NM_007956	estrogen receptor 1 (alpha)	0.35	2.68	3.66	0.59	0.32	28.76	NA	NA	NA	0.16	0.19	81.78	AGGAAAATTATTCAGGGCAGCTAATTTTGCTTTTACCAAAATATCTGTAGTAATATTTTTGGACAGTAGC
bsid(870122)	2310061I09Rik/Ccdc115/Ccp1	1	XM_129811	RIKEN cDNA 2310061I09 gene	0.39	2.67	3.81	-1.41	-0.48	17.04	0.09	1.14	44.82	-0.53	-1.21	3.44	CTGGGCCATGGCGGTCCAGGCTCTGCGAGAGGAGTTGGACTCCAAGTGCCTACAGCTGCTCAGTGACCTG
Cbfb		1	NM_022309	Mus musculus core binding factor beta (Cbfb), mRNA.	0.41	2.67	3.78	-0.11	0.03	57.99	0.25	1.17	43.92	0.05	-0.03	84.31	TTTTCCGGCCAGCTGGCAGGGAGAACAGCGACAAACACCTAGCCGGGAATATGTCGACTTAGAGAGAGAA
Pcmtd1			NM_183028	RIKEN cDNA A030012M09 gene	0.55	2.67	3.77	0.56	0.29	32.27	0.14	0.94	51.23	0.06	-0.02	84.67	CTGCTTAGGGACCTCCAGCAGCAGGGGGAATGATATGATCAGTAGAGACATTTTAGCAGTGGAACTTTTC
Rab6			NM_024287	Mus musculus RAB6, member RAS oncogene family (Rab6), mRNA.	0.34	2.67	3.79	-0.1	0.04	57.77	-0.03	0.28	80.01	-0.08	-0.29	67.37	AGAGCGGTTCAGGAGCTTGATTCCTAGCTACATTCGAGACTCCACTGTGGCAGTTGTTGTTTATGATATC
Sesn3			NM_030261	sestrin 3	0.35	2.66	3.86	1.67	0.73	0	0.04	1.16	44.22	0.66	1.1	9.15	GGCTAACCCAAATGGGCCAGCTCGTGTAATACTCTAGTGGTTTAATGCCTCTCTTCTCGTTCTGCTGCTG
2610101N10Rik			NM_026476	RIKEN cDNA 2610101N10 gene	0.57	2.65	3.95	-1	-0.31	37.02	0.25	1.18	43.57	-0.59	-1.32	1.76	ATTATGCACCTGGCTCACATGATGTAGGAGATCCCAGCACTACAAATTTATACCTTGGAAACATTAATCC
Ppp3ca			NM_008913	Mus musculus protein phosphatase 3, catalytic subunit, alpha isoform (Ppp3ca), mRNA.	0.48	2.65	4.01	1.51	0.68	1.09	0.2	2.17	39.74	NA	NA	NA	TGCATTGAGAATAATAACAGAGGGTGCTTCGATTCTCCGACAGGAAAAAAACTTGCTGGATATCGACGCA
Ttc3		4	NM_009441	Mus musculus tetratricopeptide repeat domain 3 (Ttc3), mRNA.	0.57	2.65	4.01	0.11	0.12	51.65	NA	NA	NA	-0.42	-0.76	23.24	GGGGGAATATGACTGGGCCCTGCAAGCAAACATAAAAGCTCAAAAACTCTGTAAAAATGACCCTGAGGGA
Ppp2r5e		1	NM_012024	Mus musculus protein phosphatase 2, regulatory subunit B (B56), epsilon isoform (Ppp2r5e), mRNA.	0.34	2.64	4.05	0.06	0.1	53.51	-0.04	0.23	81.68	-0.21	-0.51	45.57	CCTCGGGGAGCTGGAAGAAATCTTGGATGTGATTGAACCGTCACAATTTGTTAAAATCCAAGAACCTTTG
Cep97	Lrriq2	2	NM_028815	leucine-rich repeats and IQ motif containing 2	0.32	2.61	4.37	2.25	0.94	0	-0.09	0.18	83.56	0.81	1.27	4.02	CAAAGCACGGTACCACTTTACAACATTGCAGCCCCGTGTTCCAGATTATCATTAGTGTCGGCAAGAAGAG
Cmah			NM_007717	cytidine monophospho-N-acetylneuraminic acid hydroxylase	0.39	2.61	4.33	1.95	0.85	0	-0.03	0.35	76.92	0.61	1.13	8.01	AGATAAAACTCCCTCTAACACCACCCAACTGGAAGTCGTTCCTAATGCACTGTGATTAGTCTGGACCTGG
Ssbp2		2	NM_024186	Mus musculus single-stranded DNA binding protein 2 (Ssbp2), mRNA.	0.3	2.61	4.3	1.09	0.51	9.88	0.03	1.15	44.43	0.09	0.05	85.38	CCAAATGTGATTCAAGCAACTGTACGGAGCGGCACATTAGCATTGCCCCCAACTGAACTGCGATGATTAT
Xrn1			NM_011916	5'-3' exoribonuclease 1	0.52	2.61	4.34	0.36	0.22	40.42	-0.03	0.25	81.1	-0.03	-0.21	74.9	CCACCCATATTTACAAATTATCCTCCTGCGGTACCACCTGGAGCCGTCCCTCCTGTTTTTACCCAACCTA
3110048E14Rik		2	NM_133750	RIKEN cDNA 3110048E14 gene	0.47	2.6	4.47	-0.71	-0.19	51.03	0.31	1.58	36.91	-0.48	-0.82	18.98	ATGGACAGGGGCACCATGGTGCTGACCACCAACTACGACAACCTGCTGGAGATCTTCGGGCAGCAGCAGA
Fyn			NM_008054	Mus musculus Fyn proto-oncogene (Fyn), mRNA.	0.42	2.6	4.47	NA	NA	NA	NA	NA	NA	0.07	0.01	85.06	GAGCCGCCTGGGCCGCGCCGGAGGAGGGCGGGGAGAGGACCATGTGAATGTGCTCCGGAGCTGAGCGCCA
Gas7			NM_008088	Mus musculus growth arrest specific 7 (Gas7), mRNA.	0.6	2.6	4.47	2.89	1.19	0	NA	NA	NA	NA	NA	NA	ATACCACGCATCAGGGACCCCGGCGCACCCTCCAGAGACTGCCCACATGAGTCTCCGAAAATCCACCGGT
Add1			NM_013457	Mus musculus adducin 1 (alpha) (Add1), mRNA.	0.51	2.59	4.48	0.42	0.24	37.87	NA	NA	NA	0.11	0.08	85.18	CGGATTCTATCGCATATGACAAAGGGGAGAAGTTACTGCGGTGTAAACTGGCAGCATTTTACAGACTGGC
bsid(866818)	Prpf3		mSQ032510	Prpf3 intron-exists in UCSC expressed sequence tags	0.37	2.58	4.63	-0.16	0.01	58.84	NA	NA	NA	-0.01	-0.16	78.41	GCGCTCGCCCCTGGCTGAGGATATGTCCTTGCAAAACACGAGCCCTCCTAGTGAAGAGGGGATGTCACCC
Cux1	Cutl1	3	NM_009986	Mus musculus cut-like 1 (Drosophila) (Cutl1), transcript variant 1, mRNA.	0.46	2.58	4.61	0.06	0.1	53.75	0.01	0.45	72.53	0.33	0.42	63.65	CGAGGCCGCGGGCGCCCGGGACAACCTGGTGCGGAAGAAGAAGGCTGCGAACTTGAACAGCATCATCCAC
Ssbp2		2	NM_024186	single-stranded DNA binding protein 2	0.29	2.58	4.59	0.86	0.42	17.18	0.01	0.93	51.68	-0.11	-0.35	61.51	CAACAAATGCGAATTCAATACCCTACTCCTCAGCGTCTCCTGGGAATTACGTAGGTCCTCCGGGAGGTGG
2210009G21Rik			NM_028834	RIKEN cDNA 2210009G21 gene	0.31	2.57	4.69	0.49	0.26	35.92	NA	NA	NA	0.13	0.09	84.99	AGACAGTGCCAGGTACTTCTGGCCACATCTTGGGCTGCAGTCCTCTGACTTCTCAAACTGAGTACCTGAC
Iqgap1			NM_016721	IQ motif containing GTPase activating protein 1	0.44	2.56	4.87	1.93	0.81	0	0.55	1.56	37	0.87	1.27	3.95	TAATTGGTGACAGATCATGCGGTATGTCCCTATTACAAATGTAAGTCTTGGAGAAGGGTCCTTCATGGTG
bsid(978497)	Pb1		XM_484357	RIKEN cDNA 2310032M22 gene	0.28	2.55	4.93	0.44	0.24	37.93	-0.07	-0.03	89.04	-0.07	-0.26	70.39	ACTTCAGCAGTTTTTTATTAGAATTCGTGATGAACTCTGCAAAAATGGAGAGATCCTTCTTTCTCCAGCA
Rfx5		1	NM_017395	regulatory factor X, 5 (influences HLA class II expression)	0.38	2.55	4.96	1.37	0.62	3.46	NA	NA	NA	0.13	0.09	85.05	GTTAAAGGGTCGTGTACTTCAAAGTTCCCTAACCCCTGAGCATAAAGACCCCAAAGCAACACCCCCATGA
Zzz3		3	NM_198416	zinc finger, ZZ domain containing 3	0.55	2.55	4.95	-0.76	-0.22	47.83	0.23	2.02	38.57	-0.46	-1.04	7.94	GTGCCAGTCAGCACACTGCCGAGGAGGAAGATGATGACCCTGATGTTTATTACTTTGAATCAGATCATGT
Acbd5			NM_028793	Mus musculus acyl-Coenzyme A binding domain containing 5 (Acbd5), mRNA.	0.49	2.54	5.07	1.12	0.51	10.13	NA	NA	NA	0.24	0.28	76.43	CTTAAGTTCTATAGCTTCTACAAACAGGCAACTGAAGGACCCTGTAAACTTTCACGGCCTGGATTCTGGG
Pcmtd1			NM_183028	RIKEN cDNA A030012M09 gene	0.45	2.54	5.08	0.9	0.41	18.6	0.12	0.89	53.43	0.29	0.34	71.31	ACCTCCAGCAGCAGGGGGAATGATATGATCAGTAGAGACATTTTAGCAGTGGAACTTTTCATTAAGTAGA
Tbc1d14		1	NM_133910	Mus musculus DNA segment, Chr 5, ERATO Doi 110, expressed (D5Ertd110e), mRNA.	0.59	2.53	5.18	-0.99	-0.31	36.91	0.25	1.21	42.74	-0.33	-0.77	22.36	TGGTCCGTATCATGACATGTTGCACAGTATTTTGGGCGCTTATACTTGTTACCGGCCGGATGTGGGTTAT
Triobp			NM_138579	Mus musculus TRIO and F-actin binding protein (Triobp), mRNA.	0.34	2.53	5.09	-0.63	-0.12	56.64	0.03	0.75	59.11	0.63	0.5	55.59	AGCGCCACCCATGAAGACACTTCTCTTCTGTTCCGTGAGTCACCCTAACTTAATAAAACCTTCCGGCAAC
5830457O10Rik			NM_145412	RIKEN cDNA 5830457O10 gene	0.56	2.52	5.22	-0.8	-0.23	46.63	NA	NA	NA	-0.17	-0.42	55	GATCAAGCTTTTTAGGTACAAACCCGGCCCCTAGGTCGGGTATGTTTCCAGGCCCAGGCCTGGGTCCCAA
bsid(1001198)	Chek2		mSQ035532	Chek2 intron-exists in UCSC expressed sequence tags	0.34	2.52	5.21	-0.23	-0.01	59.46	0.06	0.88	53.68	NA	NA	NA	CCGATCTTCGCTGCTAGGCTCTGCAGGAACTGAAGAGGGTACGTCTGCATACTCAGCATACGTGAGGGGT
Ddah2			NM_016765	dimethylarginine dimethylaminohydrolase 2	0.26	2.52	5.28	2.56	1.05	0	0.02	1.02	48.71	0.18	0.2	81.45	GGATCCCACTGGTTAGGAATAGAGCTGTATAGTGGGTAGAATCAGCTAATAGAGGCTGGGTAGTTGTGGG
Msl31		4	NM_010832	male-specific lethal-3 homolog 1 (Drosophila)	0.41	2.52	5.22	0.15	0.14	49.67	NA	NA	NA	-0.09	-0.33	63.56	TTAGTTGCTTACACAGATTCAGGTTGGTGGGAACTGATTGGAACGGCCTTCACGTTCTTGGTAGGTGTGA
Tpm4			NM_001001491	tropomyosin 4	0.4	2.52	5.24	0.1	0.12	51.91	0.04	1.02	48.45	0.11	0.08	85.2	CAAGCACATCACTGACGAAGCCGACCGCAAGTATGAGGAGGTTGCTCGTAAGTTGGTCATCCTGGAGGGT
5730557B15Rik			NM_026153	RIKEN cDNA 5730557B15 gene	0.38	2.51	5.35	1.34	0.59	4.87	NA	NA	NA	NA	NA	NA	AAGGAAGTTATAGGTGAGAGGCTTGTGGAGAGGGGCTAACTCCAGTCCCCAAATGATGTAAGGCCTGCTA
Calm1			NM_009790	calmodulin 1	0.25	2.51	5.37	2.02	0.88	0	-0.09	-0.08	89.85	-0.28	-0.73	25.8	GACGGGGGACCAACTCTATGGAAATTGTAAATAAGTTTTATTTATAAACCTGGCACTGTATTCAATAAAC
Mdm1			NM_148922	Mus musculus transformed mouse 3T3 cell double minute 1 (Mdm1), mRNA.	0.37	2.51	5.36	0.56	0.31	30.15	NA	NA	NA	-0.46	-1.03	8.34	AGTTCCTGAGCCCAGCCCAGTATTTCTATAAAGCTGGAGCTTGGACCCGGGTGAAGGAGAACCTGTCAAA
Pou2f1		4	NM_011137	Mus musculus POU domain, class 2, transcription factor 1 (Pou2f1), transcript variant 1, mRNA.	0.29	2.51	5.38	0.77	0.37	23.27	-0.02	0.42	73.84	0.33	0.41	65.02	CATTTGCCTAATTTTATAATAAAACAATGTCTTTTCAGGATTGCTTCATGGATTGGAGAACTTTCTAACC
Rab6			BC019118	Mus musculus RAB6, member RAS oncogene family, mRNA (cDNA clone MGC:29434 IMAGE:3711087), complete cds.	0.3	2.51	5.36	0.05	0.1	53.78	0.02	0.65	63.47	0.12	0.09	85.08	GGATACTGCGGGTCAGGAACGTTTCCGTAGCCTCATTCCCAGTTACATCCGTGACTCTGCTGCAGCCGTA
Ttc7b			XM_127105	tetratricopeptide repeat domain 7B	0.47	2.51	5.35	1.18	0.54	7.75	-0.03	0.53	68.8	0.36	0.61	44.86	TTCTGTTTCCCACCTCAGTACTCGTCCATGCCAGGACACCAGCTGACAACGTCTCGGTCTCATTGTCACC
Zzz3		3	NM_198416	zinc finger, ZZ domain containing 3	0.51	2.51	5.37	-0.65	-0.18	52.3	0.25	1.92	37.71	-0.3	-0.68	29.33	CCAAAGAGAGTGCCAGTCAGCACACTGCCGAGGAGGAAGATGATGACCCTGATGTTTATTACTTTGAATC
Mafg			NM_010756	v-maf musculoaponeurotic fibrosarcoma oncogene family, protein G (avian)	0.87	2.49	5.64	NA	NA	NA	0.6	2.3	40.47	NA	NA	NA	CTTGTAAACCTGGGGACAGCGCTGTGGCTGTTGGAGTTTAGTTTTTATACACAGAGTTATCAGACATTAC
bsid(986983)	Chek2		NM_016681	Mus musculus CHK2 checkpoint homolog (S. pombe) (Chek2), mRNA.	0.34	2.48	5.65	0.05	0.1	53.76	-0.01	0.57	67.12	-0.12	-0.38	59.34	TACCTTCACGAAAATGGGATCATACATCGGGACTTAAAGCCGGAGAATGTTCTTTTATCATCTCAGGAAG
Exo1		1	NM_012012	Mus musculus exonuclease 1 (Exo1), mRNA.	0.41	2.48	5.72	-0.96	-0.3	38.17	0.08	0.84	55.13	-0.7	-1.41	1.07	AGACGACAAAGCAACCTTCTTAAAGGGAAGCAGCTTCTTCGAGAGGGCAAAGTGTCAGAAGCCCGAGACT
Mll5			AK007682	Mus musculus 10 day old male pancreas cDNA, RIKEN full-length enriched library, clone:1810033J14 product:hypothetical SET-domain of transcriptional regulators (TRX, EZ, ASH1 etc) containing protein, full insert sequence.	0.24	2.48	5.75	1.28	0.56	6.53	0.03	0.83	55.58	0.85	0.86	22.3	ATACCCTTTTGTTTTATTCTACTCTAAGTTCCATGGGCTTGAAATGTGTGTTGATGCGAGGACTTTTGGG
Hkr2			NM_001001447	GLI-Kruppel family member HKR2	0.28	2.47	5.85	-0.52	-0.13	56.3	0.01	1.05	47.53	-0.18	-0.48	48.31	CGCAGCTCAGCTCTCATGGTGCACCTAAAGATCCATATCACCGTGACTCGAAGCACCCCTTAGAGTACAG
Prdm1			NM_007548	PR domain containing 1, with ZNF domain	0.36	2.47	5.84	6.48	2.57	0	NA	NA	NA	NA	NA	NA	TTAATTGTAGGTTAACCAAAGCATGACCTGACATTGACACCAAATACAAATACGATTTCTTTGCAGTGAA
Chfr			NM_172717	Mus musculus checkpoint with forkhead and ring finger domains (Chfr), mRNA.	0.45	2.46	5.94	0.39	0.22	40.18	0.19	1.35	39.61	0.05	-0.03	84.43	AGGTCCAGGGCAGGGTGATGATCCCCAGGTTCCACTATTGTCACCCATGGCTCAGACATGCTTAGAGGAA
E2f6			BC019166	Mus musculus E2F transcription factor 6, mRNA (cDNA clone IMAGE:4236246), containing frame-shift errors.	0.42	2.46	5.94	-0.61	-0.16	53.98	0.21	1.57	36.97	-0.39	-0.83	18.45	TAAAGCTTCTAGCCAGGTGTGGTGGCCCAGTTCTGTAATGCCAGTCCTTGGGAGGCAGAGACAGAAGGAT
Wasf2			NM_153423	WAS protein family, member 2	0.3	2.46	5.88	0.7	0.33	27.4	-0.01	0.45	72.61	1.16	1.19	5.89	GTACTCCCAATAACCTGAAGATTCCATGTAACTCTTATGTACGCGCATGAATACTTTAAATGCCAACCTT
AW060766			mSQ006952	expressed sequence AW060766	0.3	2.45	6.04	0.76	0.35	25.41	-0.12	-0.39	88.72	1.27	1.2	5.69	AAAATTACTTGTGCATTTTGGGAATCTTTCTGTAGCTTTGTGTTTTGTATGCTCTGGATTCATAACTGGA
Atf2			NM_009715	activating transcription factor 2	0.36	2.43	6.32	0.17	0.15	48.89	0.07	1.11	45.7	1.1	0.65	40.34	ATGGCTCCTCCCTCCCAGGCACAGCCCTCAGGAAGTTGATTAAAACCTGCAGTGCAACAGTTTTAGATAC
Atrx		2	NM_009530	alpha thalassemia/mental retardation syndrome X-linked homolog (human)	0.37	2.43	6.35	0.42	0.24	38.21	0.12	1.05	47.4	0.05	-0.04	84.07	AGCAGTACACTCAGCAGCAACAGCAACAATTGACTTATCAGCAAGCAACACTGAGTCACCTCATGATGCC
Ralbp1			NM_009067	ralA binding protein 1	0.3	2.43	6.25	NA	NA	NA	0	0.57	67.25	NA	NA	NA	TATGGTCAGGTGTCAAATATAAATGTACAAACGCCTTGCTGCATCCCGTCCGGTGTACAACATCCACTTT
Sbk1	Sbk		NM_145587	SH3-binding kinase	0.33	2.43	6.28	3.35	1.42	0	-0.07	0.37	76.07	0.57	1.04	11.68	GTCTCGCCTCTCCTACCCCATGTGTTTGTAAATACTCTGGCTTCCTTTGGCCCTGAGGAGGTTTTTAAAT
Wdfy1			NM_027057	WD repeat and FYVE domain containing 1	0.28	2.43	6.27	0.66	0.34	26.69	-0.06	0.38	75.59	-0.09	-0.29	67.58	TCCTCCATGAATGGAGACCCTTCATGTAGCTCAACAGCCACTGTCGTGTAAATGGACATTAGACGCCTAA
Crip2			NM_024223	cysteine rich protein 2	0.34	2.42	6.42	-0.06	0.05	56.9	-0.12	0.04	87.56	-0.11	-0.27	69.19	CTACTCCCTACCTACCCTCACATGGTTCATGGCTATGGAGACTTTTGCTGTCAATAAATAGTTTGGTTTG
6430510M02Rik			mSQ013099	RIKEN cDNA 6430510M02 gene	0.38	2.41	6.53	1.35	0.6	4.3	0.05	0.8	56.91	0.04	-0.06	83.4	TGGACAGGTTGAGTCCCAGGCTGGTAGGAGGTGAGTTATGTGGAAACATAGATTGAATTCCAAGATGCTG
Clk1	sty		U21209	Mus musculus nuclear dual specificity kinase T-Sty (sty) mRNA, complete cds.	0.41	2.41	6.49	1.08	0.5	10.38	-0.02	0.4	74.78	0.5	0.79	27.96	AAAAGATCGAGGAGTGTAGAGGATGATGAGGAGGGTCACCTGATCTGTCAGAGTGGAGACGTACTAAGTG
Ezh2		2	NM_007971	Mus musculus enhancer of zeste homolog 2 (Drosophila) (Ezh2), mRNA.	0.56	2.41	6.49	NA	NA	NA	-0.02	0.19	83.03	-0.37	-0.51	45.98	CTTGGATTTTCCAGCACAAGTCATCCCGTTAAAGACCCTGAATGCAGTCGCCTCGGTGCCTATAATGTAC
0610010F05Rik			NM_027860	RIKEN cDNA 0610010F05 gene	0.43	2.4	6.64	-0.97	-0.31	36.98	0.23	1.69	36.64	-0.38	-0.96	11.09	CAAGGAGAAAATGATGATTCGCCTTCTTGCCCACCTGCTAAAATACTGGATGATCTGCACAAGCACAAAG
Sestd1			NM_175465	SEC14 and spectrin domains 1	0.3	2.4	6.67	0.17	0.15	49.03	0.02	0.95	50.98	-0.27	-0.55	41.4	CGAGTGCCTTACTAACGGGGCATTCTTAGAATTGTAAGGAGGGTTAATCATTGTTTGTGATGGTGGATGC
Ttc3			NM_009441	Mus musculus tetratricopeptide repeat domain 3 (Ttc3), mRNA.	0.44	2.4	6.72	0	0.08	55.27	NA	NA	NA	-0.57	-1.18	3.97	ATGAGAGGAAATGAAGAGTTCTCAAAGGAAAAGTTTGAAATAGCTGTTATTTATTACACCAGAGCCATTG
Dgkd			mSQ021722	diacylglycerol kinase, delta	0.31	2.39	6.82	2	0.86	0	-0.06	0.27	80.29	0.56	0.88	20.97	GACCATCTGGAGCAGATTCCTCTTGTATTGTTATGTACATAGTCTGCATCAGAGAGTTGTAAATAAGTTC
Pcmtd1			NM_183028	RIKEN cDNA A030012M09 gene	0.5	2.39	6.86	0.93	0.43	16.27	0.12	0.81	56.68	0.35	0.53	52.77	ACCTCCAGCAGCAGGGGGAATGATATGATCAGTAGAGACATTTTAGCAGTGGAACTTTTCATTAAGTAGA
Ppp3ca		1	NM_008913	protein phosphatase 3, catalytic subunit, alpha isoform	0.24	2.39	6.75	1.69	0.75	0	0.08	1.44	38.19	NA	NA	NA	GTCTTCAATTGGTTGTCAGGTTGTTTTGGTTGTATGGGACACCTCCCAGCTCCAGCAAAAAGCACTAGTC
bsid(934009)	Thrap1		XM_484058	thyroid hormone receptor associated protein 1	0.42	2.38	6.99	0.72	0.35	24.93	0.04	0.34	77.37	0.65	0.98	14.5	GCTTCAGCACTGACAGTACTAGCCATCATGGTGGGAAAATACCCAGAAAATTAGCAAATCATGTGGTGGA
bsid(985468)	Fancd2		XM_132796	Fanconi anemia, complementation group D2	0.29	2.38	6.91	0.18	0.15	48.95	-0.07	0.09	86.45	0.02	-0.1	81.85	GGTAATATTGAGTTGAGGTTTGTGCAATCGTACTGGTGGCCTAAAAGTATGTTCCGTACTGTTATCTTCC
Pacsin2			NM_011862	Mus musculus protein kinase C and casein kinase substrate in neurons 2 (Pacsin2), mRNA.	0.37	2.38	6.91	-0.74	-0.21	48.42	0.24	1.88	37.39	-0.3	-0.61	35.48	ACCTTAGTGTCCCGAGCAACCCCGCCCAGTCCACGCAGTTACAGTCCAGCTACAACCCCTTCGAGGACGA
Rnf14			NM_020012	Mus musculus ring finger protein 14 (Rnf14), mRNA.	0.49	2.38	6.97	0.06	0.1	53.82	0.09	1.07	46.82	-0.18	-0.45	52.07	TACACCATTTGCTTTCTGCCACCACTTGTGCTGAACTTTGAACTGCCACCAGATTATCCATCCTCCTCCC
bsid(990186)	Chfr		mSQ034859	E3 ubiquitin-protein ligase	0.56	2.37	7.08	0.3	0.19	43.97	NA	NA	NA	NA	NA	NA	ACTGTTATCTGTTGAGCCGTTTGTGAGATAAACTATCGTGACAAAGCTGCTGATACGATGAGATCTCCCA
Dnajb4			NM_025926	DnaJ (Hsp40) homolog, subfamily B, member 4	0.36	2.37	7.01	1.01	0.49	11.82	-0.05	0.41	74.32	-0.01	-0.17	77.83	ATTTCATTTACAAGTAAAAGTTGGTTTTGTGGTCTATGGATATACTTCTAGTAAATACTAGATTATCCAA
Itpkb		3	XM_205854	inositol 1,4,5-trisphosphate 3-kinase B	0.34	2.37	7.01	0.03	0.09	54.48	0.25	1.55	37.08	0.38	0.57	47.96	TTGAAGGACTTAGACCGGTGTTTCTCCATGTAATTCGGTAGTTGCCAGAGTTGTTCAGAGGGCTGCCCAA
Klhdc1			NM_178253	kelch domain containing 1	0.38	2.37	7.02	-0.19	0	59.18	0.19	1.16	44.21	0.24	0.33	71.85	CACACTTTAACAGCAATAACTGATGATAAGCTTTTCCTATTTGGTGGACTAAATGCAGATAATATTCCAC
Map3k2			NM_011946	mitogen activated protein kinase kinase kinase 2	0.39	2.37	7.13	0.22	0.17	46.84	NA	NA	NA	-0.01	-0.16	78.12	GCACAGGAATGAAGTCTGTCACAGGCACGCCATACTGGATGAGTCCTGAGGTCATCAGTGGAGAAGGCTA
Bach2			NM_007521	BTB and CNC homology 2	0.48	2.35	7.34	1.13	0.52	8.9	0.09	0.85	54.76	0.7	0.89	20.42	GCTTCTCAAGGTTCAATCTCAGACCTTTTACTTTCGTTGGTTTGGTTTTGGTGCCGCCGAACGGTGTCAG
bsid(945454)	2610016F04Rik		NM_025847	Mus musculus RIKEN cDNA 2610016F04 gene (2610016F04Rik), mRNA.	0.25	2.35	7.27	0.63	0.32	28.37	-0.05	0.24	81.22	0.16	0.16	83.29	GGACACTTTTAATAAGCTATTTCAAATTTGGTTTTGTTACATTAAGTTGACTATCAAATACACAAAAGAT
Setd8			NM_030241	RIKEN cDNA 2410195B05 gene	0.33	2.35	7.3	-0.96	-0.3	38.25	-0.01	0.81	56.68	-0.22	-0.57	39.24	TATAAGACCCTACCCTCGTCCCCTACACCCCCATCTCCCAGGCTCATGATGGTGCTACCTACGAAAGTCT
Sla			NM_009192	src-like adaptor	0.33	2.35	7.32	1.54	0.69	0.74	0.14	1.88	37.43	0.3	0.47	58.6	TCAGAGGGAGCAGAGAACCCACTCAGAGTGGACGAATCCCTTTTCAGCTATGGTCTTCGGGAAAGCATTG
Ttc3			NM_009441	Mus musculus tetratricopeptide repeat domain 3 (Ttc3), mRNA.	0.43	2.35	7.34	0.01	0.08	55.1	NA	NA	NA	-0.5	-0.97	10.84	AGATGCTTTAAATTGGATAAAATACACGGGTGATGTAACAATTCTACCTAAATTAGGATCAGTTGACAAT
Tlk2		4	AK048492	Mus musculus 16 days embryo head cDNA, RIKEN full-length enriched library, clone:C130066B01 product:tousled-like kinase 2, full insert sequence.	0.53	2.34	7.44	0.27	0.18	44.92	NA	NA	NA	-0.2	-0.46	50.26	AGCGGGCCAGGAACCAGCCCTGGCAGAAGTGTTCCACCAGTTGCACGATCCTCACCGCAACATTCCTTAT
Ankrd27			NM_145633	ankyrin repeat domain 27 (VPS9 domain)	0.26	2.33	7.57	-1.5	-0.44	21.03	0.13	1.52	37.34	-0.79	-0.96	11.37	AGAGGACATCCAGGGAGACTATGGGAAGGGATAGAAGTGTGCCCGATCTTGCAGGACGTTCTCTTCAGGA
Cdkn1b		1	NM_009875	cyclin-dependent kinase inhibitor 1B (P27)	0.51	2.33	7.65	NA	NA	NA	NA	NA	NA	NA	NA	NA	AAATGCCTGACTCGTCAGACAATCCGGCTGGGTTAGCGGAGCAGTGTCCAGGGATGAGGAAGCGACCTGC
1200015M12Rik			mSQ030208	RIKEN cDNA 1200015M12 gene	0.39	2.32	7.81	NA	NA	NA	-0.06	0.44	73.16	0.35	0.44	62.16	TTCTGGTTTTGTTCCCATGTTAAAAATAGAGTAAATGCAGTATTCTCCACATAGAGATATAGACTTCTGA
Cdkn2c			AK087461	Mus musculus 0 day neonate eyeball cDNA, RIKEN full-length enriched library, clone:E130217A19 product:cyclin-dependent kinase inhibitor 2C (p18, inhibits CDK4), full insert sequence.	0.3	2.32	7.75	1.2	0.49	11.1	-0.01	0.47	71.61	0.29	0.23	79.66	TCTGCTAGCGAGCGAGCAGCACTCTGGACTACCCCCTTCGGCTAGACGGATGGAAAGTGAGCTCTGCGAA
Cmah			NM_007717	Mus musculus cytidine monophospho-N-acetylneuraminic acid hydroxylase (Cmah), mRNA.	0.4	2.32	7.69	1.07	0.5	10.31	0.1	1.42	38.45	0.29	0.34	71.33	TCAAGTTGGGAGACAAGCGAATGGTATTTGACCCTTGGTTAATTGGCCCTGCTTTTGCCCGAGGATGGTG
Lef1			NM_010703	Mus musculus lymphoid enhancer binding factor 1 (Lef1), mRNA.	0.33	2.32	7.73	NA	NA	NA	0.02	0.66	63	NA	NA	NA	AGCCTGTTTATCCCATCACGGGTGGATTCAGGCAACCCTACCCATCCTCACTGTCAGGCGACACTTCCAT
Mospd1			NM_027409	motile sperm domain containing 1	0.32	2.32	7.79	1.59	0.72	0.13	NA	NA	NA	-0.19	-0.51	45.33	GCAGTCTGGAGACTCTGACAAAGGAGCAGGGAGCAGTCGCAGCTGCTTTCCGAGGAGCCAGTGTTGCTGA
Pscd3			NM_011182	pleckstrin homology, Sec7 and coiled-coil domains 3	0.29	2.32	7.72	1.38	0.61	3.99	0.01	0.95	51.01	0.34	0.48	57.74	GCAAAGCAAACAGCTAGTAAAATGGAGGGCCTTACGGCTGTCAGAACTATTGCAAATACTGTGTTCCCTA
Setd8			NM_030241	RIKEN cDNA 2410195B05 gene	0.34	2.32	7.73	0.16	0.14	49.81	NA	NA	NA	-0.19	-0.5	46.48	GTTTCCCGGGAGATTCCAGGCGGTGACAGAGCCCGGCCATGGCTAGAGGCAGGAAGATGTGCAAGCCCCG
Ddx26b		2	NM_172779	RIKEN cDNA 6330505F04 gene	0.5	2.31	7.93	NA	NA	NA	NA	NA	NA	NA	NA	NA	AGCTTAAGCCAAATCTGAAGTGGCGACAGGCTTTTGACAGCTACTTAAAAACTCTGCCTCCATACTACTT
Mrpl47		4	NM_029017	mitochondrial ribosomal protein L47	0.23	2.31	7.96	-0.98	-0.31	37.01	-0.07	0.3	78.85	-0.31	-0.73	25.24	GTACTGAAAGTTTTTATGACTCAAAATTGTAATAAACCATTTCCAGAAAACCCAGAGTGGTGTTCTAGGG
Rngtt		2	NM_011884	mRNA capping enzyme (HCE) (MCE1) [Includes: Polynucleotide 5'- triphosphatase (EC 3.1.3.33) (mRNA 5'-triphosphatase) (TPase); mRNA guanylyltransferase (EC 2.7.7.50) (GTP--RNA guanylyltransferase) (GTase)].	0.4	2.31	7.96	-0.38	-0.07	59.02	0.22	0.94	51.45	NA	NA	NA	ATATGATAGTCAAGTTGCTGAAGAAAACCGGTTCCATCCCAGTATGCTCTCAAATTATCTAAAGAGCCTG
A830025F02Rik			mSQ009856	RIKEN cDNA A830025F02 gene	0.37	2.3	8.06	0.46	0.25	37.51	NA	NA	NA	-0.3	-0.64	33.43	GCACCTAAGAATTCATAGTGGGGAGAAGCAGTTTAAGTGCAGCAAGTGTGAGAAGGTGTGTAGTCGCCTT
bsid(900014)	E130016E03Rik		XM_485355	RIKEN cDNA E130016E03 gene	0.45	2.3	8.1	0.04	0.09	54.24	0.19	0.76	58.51	-0.53	-0.86	16.68	CAAAATTGTATGAATTGCATACATATTACTTTAAAGAACTGAATTTTTAACAGTTTTAGTTACGACTTTA
Pmaip1		1	NM_021451	phorbol-12-myristate-13-acetate-induced protein 1	0.33	2.3	8.1	-0.3	-0.04	59.61	-0.04	0.44	73.14	0.45	0.68	37.32	AAACCATCATACGATGATCTTATATTCTCTAGGTTTGCCTGTTACTGGAAGCGAAAGCTAACACGCAGAG
Zcchc17			NM_153160	Mus musculus RIKEN cDNA 2810055E05 gene (2810055E05Rik), mRNA.	0.36	2.3	7.99	-0.4	-0.08	58.74	0.1	1.32	40.19	-0.05	-0.25	71.65	GAATAAAAGTGTCCCTCTCCATGAAAGTTGTCAACCAAGGAACTGGGAAAGACCTCGATCCCAACAACGT
Abl1		1	NM_009594	Mus musculus v-abl Abelson murine leukemia oncogene 1 (Abl1), mRNA.	0.3	2.29	8.17	-0.18	0.01	59.02	-0.2	-0.51	85.38	0.31	0.29	75.14	GGGTGTGTACCCGGGAACCACCATTCTACATAATCACTGAGTTCATGACCTATGGGAACCTGCTGGACTA
C030046G05			mSQ018605	hypothetical protein C030046G05	0.23	2.29	8.26	0.99	0.46	14	-0.13	-0.35	89.49	0.62	0.96	15.77	TAGCATATTGTGTTACTTTTGTAATATCTTTGTATACTGTGATTTTTGTTGATGTAATAAATAGACCATT
Pik3ca			NM_008839	phosphatidylinositol 3-kinase, catalytic, alpha polypeptide	0.31	2.29	8.16	0.77	0.35	24.71	0.02	0.92	52.19	0.31	0.39	66.9	TTCACAAAGCAAATGAATGATGCACATCATGGTGGATGGACGACAAAAATGGATTGGATCTTCCACACCA
Glcci1			NM_133236	glucocorticoid induced transcript 1	0.27	2.28	8.39	3.86	1.51	0	-0.14	-0.38	88.96	-0.07	-0.25	71.28	GGACTGAATATGCTTTTTTGGTGATGAAATCTATGTACGATATTTATAGTGATGTGCTTTTATTTTCTCA
Qk			AF090402	Mus musculus KH domain RNA binding protein QKI-5A mRNA, complete cds.	0.48	2.28	8.32	0.36	0.22	40.92	-0.04	0.22	82.07	NA	NA	NA	TGTACTGTGTGACAATGCATCATGCATGAACCTTCGGTCAGGGATGTCGTTGGGGAAGTGACTTCAAAAG
Rnf34			NM_030564	ring finger protein 34	0.28	2.28	8.33	-0.02	0.07	55.77	0.05	0.94	51.56	0.05	-0.04	84.12	GCCTGAATTCCTCAAGGTCCCAGACTTCTAGTTTTTTTACACAGTCCCTCTTTTCAAATTACACTCCTCC
bsid(966983)	Mef2a		NM_013597	myocyte enhancer factor 2A	0.29	2.27	8.49	0.29	0.2	43.49	0.04	0.9	53.03	0.25	0.37	68.82	CCCCTCACTGGTGGTGAATGTGTGATGTTCTGTTGTGAGCTTTGTGCTGTATGGGGTGAGCATCATTATA
Zzz3		3	NM_198416	Mus musculus zinc finger, ZZ domain containing 3 (Zzz3), mRNA.	0.53	2.27	8.48	-0.75	-0.21	48.51	0.25	1.69	36.64	-0.45	-0.96	11.33	GGCCAGAAGTAGTCCTACTAAAACCACATCTCCTTACAGAGAAAATGGACAGTTGGAGGAGACTAATCTC
Glcci1			NM_133236	glucocorticoid induced transcript 1	0.27	2.26	8.69	3.47	1.46	0	-0.17	-0.58	82.87	0.25	0.38	68.08	TTTAATTTTAGCCACTGCGCTGAACAGTATTCAAGTTATATAATATGGCTTTACACAAGAAATGTGTGGC
Mdm1			NM_148922	Mus musculus transformed mouse 3T3 cell double minute 1 (Mdm1), mRNA.	0.25	2.26	8.63	NA	NA	NA	0.05	1.2	43.05	NA	NA	NA	CTTCCTACACCGAGGCTGAGAGAACTCGGTATCCAGCGGACGCACCATGATCTCACGACGCCAGCTGTTG
Ppp1cb		1	NM_172707	Mus musculus protein phosphatase 1, catalytic subunit, beta isoform (Ppp1cb), mRNA.	0.57	2.26	8.61	-0.22	-0.01	59.38	0.18	0.85	54.9	-0.22	-0.38	59.29	GACGGATATGAATTTTTTGCTAAACGACAGTTGGTAACCTTATTTTCTGCCCCAAATTACTGTGGCGAGT
Prkar2b			NM_011158	Mus musculus protein kinase, cAMP dependent regulatory, type II beta (Prkar2b), mRNA.	0.23	2.26	8.71	0.11	0.12	51.37	0	0.6	65.75	-0.03	-0.16	77.94	AGAAGTTGAAGAGAACGGAGCTGTGGAAATCGCTCGGTGCTTTCGGGGCCAGTACTTTGGAGAGCTTGCC
Pum2		1	NM_030723	Mus musculus pumilio 2 (Drosophila) (Pum2), mRNA.	0.42	2.26	8.65	NA	NA	NA	NA	NA	NA	NA	NA	NA	AAGTAGTAGTGCCACAAGGAGAGAGTCTCTATCTACTAGCTCTGACTTGTACAAAAGATCTAGTAGCAGC
Zeb2	Zfhx1b	1	NM_015753	zinc finger homeobox 1b	0.29	2.26	8.62	1.37	0.6	4.51	-0.04	0.2	82.74	0.1	0.05	85.38	TTCATGCACGTGCCTGACGCTTCCAGGAAGCTGTAGAGAGGGACAGAAGGGGCAGTTCAGCCAAGACAGA
Zfp212		1	mSQ027091	Zinc finger protein 212	0.31	2.26	8.61	0.26	0.19	44.83	0	0.78	57.76	0.13	0.13	84.1	TTCAGAGTCTGCCAGACCCAATGGCCTGCTTTAAGGTTGCCAGCCCCTCACCGTCGTCCGGGGGCGGAGG
Aggf1		2	NM_025630	RIKEN cDNA 2010009L17 gene	0.31	2.25	8.79	-0.67	-0.18	51.5	0.15	1.53	37.23	-0.16	-0.46	51.21	CACGCAGAAGTTTACTTCGACCATGACTTGCAAAGCTACGTTCTTGTGGATCAGGGCAGCCAGAATGGTA
Cuedc2			NM_024192	CUE domain containing 2	0.25	2.25	8.87	0.34	0.21	42.23	0.08	1.61	36.78	0.32	0.46	59.69	AAGAAGCTGATCCGATACATCGACAACCAAGTAGTGAGCACCAAGGGAGAGCGATTCAAAGATGTCCGGA
Itga4			NM_010576	integrin alpha 4	0.28	2.25	8.81	NA	NA	NA	0.11	1.35	39.72	NA	NA	NA	AGAAGAAAACAGGAGAGACAGCTGGAGTTATGTCAACAGCAAAAGCAATGATGACTGAAGACTTCTACAC
Ncaph2			NM_025795	DNA segment, Chr 15, ERATO Doi 785, expressed	0.22	2.24	8.9	0.96	0.45	14.44	-0.07	0.18	83.48	0.35	0.51	54.79	TCTAACCTACGTCTTTAACCAGGGAGTCTCAGCCTCATGACCCCAACCTCTGGAGAACCCACGCCACAAC
Zfp238			NM_013915	zinc finger protein 238	0.37	2.24	8.92	1.15	0.52	9	0.07	0.71	60.66	0.02	-0.07	82.98	GCAGTTGACTTAAAACTTTGTGTGGCAACTTCTGGTTTTCTGATGGTCCCCAGTGAGAGAAATCTGACAG
Zfp306	Zfp307		NM_023685	zinc finger protein 307	0.28	2.24	8.88	1.02	0.46	13.56	-0.1	0.06	87.04	0.38	0.53	52.47	CTGTGAGAGTGCCTTAAACAGCTTTCTTAGCATTAAATCATTGTGAATGTGCCACCCATGGAATTCCACT
Arl13b			NM_026577	Mus musculus RIKEN cDNA C530009C10 gene (C530009C10Rik), mRNA.	0.26	2.23	9.15	0.8	0.39	20.44	0	0.4	74.92	0.28	0.4	65.36	ATTCGGGGAATTTGGAAGAATTATTATGCTGAATCCTATGGGGTAATATTTGTTGTGGATTCCAGTGATG
bsid(992459)	0610007P08Rik		XM_484269	RIKEN cDNA 0610007P08 gene	0.49	2.23	9.11	-1.19	-0.39	26.51	0.26	1.11	45.51	NA	NA	NA	AGTGGCAGAGGGAATGGACCAGTTCCAAATCTCTTGTGTCTCGAGAACATGACCTCAAAATCTGTTAGGA
Irf1			NM_008390	interferon regulatory factor 1	0.27	2.23	9.06	1.99	0.84	0	0.05	1.08	46.55	1.44	1.97	0.9	TCCTGTGAAGGTTGGCTCCCTTAGCCTCAGAGGGAATCTGCCTCACTACCTGCTCCAGCTGTGGGGCTCA
Maf1			NM_026859	MAF1 homolog (yeast)	0.3	2.23	9.11	0.82	0.4	19.7	0.1	1.57	36.96	0.56	1.02	12.62	CCAGGTGGGCCACATGCACTGAGTGTCACTTTGCTGCAGCTCATTTGTTTCCAATAAAAGTTTCTGTGAC
Mapkap1			NM_177345	mitogen-activated protein kinase associated protein 1	0.25	2.23	9.13	0.09	0.11	52.28	0.08	1.13	45.03	0.16	0.17	82.62	GCCTGGCAGTCCCAGCAAGACTGTACATAGCCATGCCAGACATCTCCTTGCAACTTGATCAAATTTCTTA
Rock2		4	NM_009072	Rho-associated coiled-coil forming kinase 2	0.49	2.23	9.17	0.36	0.22	40.27	NA	NA	NA	-0.45	-0.99	10.02	GATCAACTTGAAGATCTGAAGAAAAGGAACCAGAGCTCTCAGATATCCACTGAGAAGGTCAATCAGCTCC
Smek2		1	NM_134034	Mus musculus expressed sequence AW011752 (AW011752), mRNA.	0.52	2.23	9.15	-0.34	-0.06	59.38	0.2	1.47	37.84	-0.5	-1.24	2.9	GTTATACCAATAACAGATTCGGAACTAAGGCAAAAAATACATCAGACTTACAGGGTACAGTACATTCAGG
Ccny		1	NM_026484	RIKEN cDNA 5730405I09 gene	0.41	2.22	9.32	1.12	0.51	9.58	0.14	1.36	39.45	-0.15	-0.4	56.92	TAGCCTGGCTTGGTTTTATTCAGACTGTTGACTATTGTTTTCAAGCCTTGTACACTGGACTCTACCTCTG
Cdkn2c			NM_007671	cyclin-dependent kinase inhibitor 2C (p18, inhibits CDK4)	0.22	2.22	9.33	1.54	0.68	1.2	-0.05	0.27	80.16	0.56	0.97	15.31	GGGGGACACCGCCTTCGACTTGGCCAGGTTCTATGGAAGAAATGAGGTCATTAGCCTGATGGAGGCAAAT
Gnas		3	AK020895	Mus musculus adult retina cDNA, RIKEN full-length enriched library, clone:A930027G11 product:unclassifiable, full insert sequence.	0.36	2.22	9.31	0.27	0.18	45.94	0.17	2.44	41.02	-0.02	-0.15	79.13	CGCCATGGGCTGCCTCGGCAACAGTAAGACCGAGGACCAGCGCAACGAGGAGAAGGCGCAGCGCGAGGCC
Pgm2l1		2	NM_027629	phosphoglucomutase 2-like 1	0.26	2.22	9.27	1.11	0.49	11.06	-0.06	0.1	86.05	0.33	0.49	56.42	TGAAGCAAAGCTTACATTTGATCCCTGGCAATACAAAAAGAGAGAAAGTTATTATTGATGAAGCGAAGTC
Senp5			NM_177103	SUMO/sentrin specific protease 5	0.32	2.22	9.21	-1.04	-0.33	34.23	0.09	1.2	43.05	-0.2	-0.57	39.31	CACCTGGAGGTCCACTGGTCTCTCATTACTGTGACACTCTCCAGCCGGATTATTTCATTTTATGATTCCC
Son			NM_019973	Son cell proliferation protein	0.32	2.22	9.19	0.32	0.19	44.09	-0.02	0.7	61.3	0.56	0.72	33.84	GCTACACCTAGATAGACGTAAATAAAAATGCTGTAACCGACTTATCTAATAAAAATTGGCACCCAGCCGC
Usp11		1	NM_145628	ubiquitin specific protease 11	0.35	2.22	9.33	0.94	0.43	16.2	0.03	0.57	67.13	0.74	1.13	7.78	CTGTTTACTCTGCAGACGGTGAACTCCAATGGAACCAGTGACCGGACCACTTCCCCTGAAGAAATGCAAA
Gtpbp10			BC034507	Mus musculus cDNA sequence BC034507, mRNA (cDNA clone MGC:30495 IMAGE:4222393), complete cds.	0.3	2.21	9.36	-1.11	-0.34	33.02	0.16	1.22	42.68	-0.33	-0.6	37.14	ATTCCCAAATGCTGGAAAATCCTCCTTACTGAGTCGGGTTTCCCATGCTACACCTGTGATTGCAGATTAT
Peli1			NM_023324	pellino 1	0.32	2.21	9.44	0.56	0.31	30.18	-0.01	0.65	63.62	0.55	1	13.47	TTTATCTTTATCATAGAAAGTACCTTAGAATGTTGTGATAGGCTAGCATGGTAATGATGGTGTCACACAT
Sipa1l1			NM_172579	signal-induced proliferation-associated 1 like 1	0.25	2.21	9.36	1.25	0.56	6.51	-0.03	0.3	78.98	0.36	0.56	49.15	GCGTCCCAGCCTGTTCATATCGGACAGTGCACAGCACAATTGCAGATCAACAATCATTATCTGCCTTTTT
Lats2			NM_015771	large tumor suppressor 2	0.26	2.2	9.66	1.29	0.6	4.39	0.08	1.4	38.76	0.59	1.01	12.81	TTTTTAGTTCTGGTAAATGGGCAACAGGAAGAGTCAACATGATATCAAATTAGCCCTCTGAGGACCTTCA
Rps6ka2			NM_011299	ribosomal protein S6 kinase, polypeptide 2	0.36	2.2	9.65	0.79	0.38	21.68	NA	NA	NA	NA	NA	NA	AGAGTCTAGATGGCTAGAGTCTATTTGAGAGCGTGATTCCTGTTGGTTGAGACAGGAGCCCCAGGAAATT
bsid(900205)	Mef2a		NM_013597	myocyte enhancer factor 2A	0.37	2.19	9.77	0.55	0.3	31.32	0.02	0.77	58.18	0.45	0.69	36.76	GATGGACACATGGGTGACCTAAGGCTTCCTGGTTCATGTTTGTTCTTTGTGTTACTGCAGTGAACTGCCC
bsid(933753)	2610016F04Rik		NM_025847	RIKEN cDNA 2610016F04 gene	0.21	2.19	9.73	0.7	0.36	24.24	-0.06	0.11	85.63	0.19	0.23	79.68	ATACTTAACCCAAGAAAGAGTGTAAGTGGACACAAGCTGTGCCTGCACATAGCTGTGCAGGGTAGACTGC
Cmah			NM_007717	cytidine monophospho-N-acetylneuraminic acid hydroxylase	0.35	2.19	9.76	2	0.87	0	-0.03	0.38	75.67	0.56	0.93	17.26	GGTACGACTATCTGGTGGACTTTCTAGATTTATCCTTTCCGAAAGAAAGACCCAGCCGGGAGCATCCTTA
Pde4b			NM_019840	phosphodiesterase 4B, cAMP specific	0.37	2.19	9.74	1.14	0.53	8.31	0.18	1.57	36.95	0.81	1.29	3.68	TTCTCTGGAAGAGACTGACATAGACATTGCAACAGAAGACAAGTCTCCGATCGACACATAATCTCTCTCC
bsid(859855)	Camsap1	1	XM_129375	calmodulin regulated spectrin-associated protein 1	0.39	2.18	9.88	-0.39	-0.07	58.97	0.24	1.41	38.65	-0.27	-0.58	38.94	CTCGAGGATAGTGTTGGTGAGGTAGATGTGAACGAGTGTGACCTGTCCATTGAGAAGCTCAATGAGACCA
bsid(905707)	Atp11b	1	XM_358349	ATPase, Class VI, type 11B	0.4	2.18	9.88	-0.28	-0.03	59.62	0.15	1.19	43.46	NA	NA	NA	GAAATATACCTGGCAAGCTGAAGAAAAATGGGATGAACCTTGGTATAACCAAAAAACAGAACATCAAAGA
Klhl5		1	NM_175174	Mus musculus kelch-like 5 (Drosophila) (Klhl5), mRNA.	0.37	2.18	9.94	-0.05	0.06	56.8	0.02	0.74	59.6	-0.44	-0.98	10.53	TGGAGCCATGCTCATCAGATGAATTCTTTCAAGCCCTTAACCATGCAGAGCAAACATTTAAAAAAATGGA
Rcor1		3	NM_198023	DNA segment, Chr 12, Wayne State University 95, expressed	0.53	2.18	9.91	0.73	0.35	25.19	-0.04	0.12	85.42	0.42	0.52	53.69	AATAAATGTTCTGAGACTTCAGAATCACTTTTGCTCTCTTACCAGACTGTGGGCCTGAAGGGCCTGAGGA
Rnf216	Ubce7ip1	1	NM_080561	ubiquitin conjugating enzyme 7 interacting protein 1	0.4	2.18	9.84	NA	NA	NA	NA	NA	NA	NA	NA	NA	GGAAAGAACACAACGGCCTCACCTGTGAAGAGCTGGCAGAAAAGGATGACATCAAGTACCGGACATCCAT
Tnfrsf13b			NM_021349	tumor necrosis factor receptor superfamily, member 13b	0.3	2.18	9.96	0.21	0.16	47.66	0.14	1.77	36.81	0.28	0.31	73.55	CTGTGGAAACGTGTAGCTTCTGCTTCCCGGAGCGCAGTTCTCCCACTCAGGAGAGCGCGCCGCGTTCGCT
Footnotes:
Genes for which there were dischordant oligos (direction of change was different or the same but with an FDR > 35% for one or more oligos) are marked with a footnote.
Genes with dischordant oligos are categorized into four groups based on possible explanations for dischordant behavior:
1	Alternative polyadenylation
2	Alternative splicing
3	Dischordant oligo in unanotated region of gene or otherwise suspect
4	No obvious explanation
(FDR, local False Discovery Rate, %; SAM, Significance Analysis of Microarrays)
