# Supplementary material for: Extensive Gene-Specific Translational Reprogramming in a Model of B Cell Differentiation and Abl-Dependent Transformation
Source: PLoS One. 2012 May 31;7(5):e37108. doi: 10.1371/journal.pone.0037108 (PMC3365017; doi:10.1371/journal.pone.0037108)
Supplement: Table S3 — Genes translationally repressed by imatinib in increasing order by SAM score. Column headings are as in Table S2. (XLS) [file pone.0037108.s006.xls]

## Sheet: Downtable.txt
Table S3. Genes represented by oligos with significant repression of translation upon Imatinib treatment (<10%FDR, SAM) ordered from most to least change by SAM score.
					Imatinib Translation			Imatinib mRNA Abundance			Rapamycin Translation			Rapamycin Abundance
Gene.Symbol	alternate name	footnote	Accession	product	Change(Log2)	SAM.Score	SAM.FDR	Change(Log2)	SAM.Score	SAM.FDR	Change(Log2)	RSAM.Score	SAM.FDR	Change(Log2)	SAM.Score	SAM.FDR	probe sequence
Eef1d			NM_023240	eukaryotic translation elongation factor 1 delta (guanine nucleotide exchange protein)	-1.41227	-12.3532	0	-1.20781	-0.40006	25.7662	-0.695279	-5.94775	0.58638	-0.405418	-0.870759	15.9201	AGATCCAGTGTGTGGTGGAGGATGACAAAGTGGGCACCGACTTGCTCGAGGAGGAGATCACCAAATTTGA
Eif3eip	Eif3s6ip		NM_145139	eukaryotic translation initiation factor 3, subunit 6 interacting protein	-1.14138	-9.33018	0.00922048	-0.66601	-0.165003	53.2531	-0.698663	-5.09338	1.00932	0.231848	0.200929	81.2742	AAGCACAAGATGAAGAATCTGGTGTGGACCAGTGGCATTTCTGCCCTAGATGGCGAATTCCAGTCGGCCT
Fbl			NM_007991	fibrillarin	-1.28039	-9.06472	0.0174133	-2.99045	-1.05536	0	-0.327507	-2.64503	3.56188	-0.22991	-0.487086	47.9538	AAACCCGAATTGTGGCCCTGAACGCCCACACCTTCCTGCGGAATGGAGGACACTTTGTGATTTCCATTAA
Mboat2	Oact2		NM_026037	O-acyltransferase (membrane bound) domain containing 2	-1.27946	-8.78921	0.0285507	-1.10223	-0.363855	30.0988	-0.701894	-6.00181	0.54482	-0.375497	-0.815022	19.4026	AGTATTCGAAGGGTTTTCTTAAGGTATCTTAGAGGACTGTGTGCATGGTGGGACTGTAAACAGTCAGGGC
Coro1a			NM_009898	Mus musculus coronin, actin binding protein 1A (Coro1a), mRNA.	-0.983933	-7.986	0.073173	-2.22292	-0.765152	0.155522	-0.229937	-1.57694	27.4571	0.662363	0.927777	17.6982	CTCATTTCCCTCAAGGATGGCTACGTGCCCCCAAAGAGCAGGGAGCTGAGGGTCAACAGGGGCCTGGACA
Sars	Sars1		NM_011319	seryl-aminoacyl-tRNA synthetase 1	-0.791016	-7.46836	0.0980322	-0.731209	-0.208717	48.9072	-0.545211	-5.12637	0.9944	NA	NA	NA	GTTTGTGAAGCCTGCACCCATTGACCAGGAGCCATCTAAGAAGCAGAAGAAGCAACATGAAGGCAGCAAA
Mettl1			NM_010792	Mus musculus methyltransferase-like 1 (Mettl1), mRNA.	-1.19472	-7.46364	0.0981654	-3.35825	-1.17913	0	-0.172206	-1.24384	45.3067	0.121002	0.0521457	85.3738	ATTCCAGAACATCGCCTGTCTCCGAAGTAACGCCATGAAACACCTTCCTAATTTCTTCCGCAAGGGCCAG
Acot7	Bach		NM_133348	Mus musculus brain acyl-CoA hydrolase (Bach), mRNA.	-1.1748	-7.46042	0.0982546	-1.27578	-0.422963	23.1512	-0.547459	-4.24939	1.21772	-0.682352	-1.29597	2.04039	TCATGCGTCCAGATGATGCCAATGTGGCTGGCAATGTTCATGGAGGGACCATTCTGAAGATGATTGAGGA
Hsp90ab1	Hspcb		NM_008302	heat shock protein 1, beta	-1.36388	-7.05048	0.0962321	0.228781	0.135793	50.2153	-0.872282	-3.35672	1.46046	-0.225982	-0.365915	60.3376	GGGAGATGCTGCAGCAGAGCAAGATCCTGAAGGTCATCCGCAAGAACATCGTCAAGAAGTGCCTGGAGCT
Eef1d			NM_023240	Mus musculus eukaryotic translation elongation factor 1 delta (guanine nucleotide exchange protein) (Eef1d), mRNA.	-1.50276	-7.02551	0.095	-1.32879	-0.416266	23.9045	-0.805156	-4.1995	1.21305	-0.749819	-1.06633	7.04295	GAATGGTGCCAGCGTGATCCTCCGAGACATTGCAAGAGCCAGAGAGAACATCCAGAAATCCTTGGCTGGA
Eif3d	Eif3s7		NM_018749	eukaryotic translation initiation factor 3, subunit 7 (zeta)	-0.738482	-6.97566	0.0920504	-0.920489	-0.286721	39.7016	-0.281095	-1.69819	22.3601	0.106821	0.0668575	85.3107	AGAAACTTAAATGAGTTGGCCTGGCGCCTGCGTGTGTTGCACCCAGCTGTGCTTGGGCAGCGTGTGTCCA
Psma5			NM_011967	proteasome (prosome, macropain) subunit, alpha type 5	-0.827195	-6.72659	0.065822	-1.09061	-0.334306	33.7539	-0.393177	-3.04623	1.9468	-0.280656	-0.595164	37.2805	CATGGAAAATATCCAGTATATGTGTGTGTGTTTTTTTATGAAGTCTGTACATAACAGCAATTCTGAAATA
Prdx6			NM_007453	peroxiredoxin 6	-0.797982	-6.59115	0.0418848	-1.82275	-0.636852	5.22077	-0.205285	-1.76542	19.8743	-0.36233	-0.815148	19.3943	AAATAAAAAGTGGGGACAGCCGGGAGAATTCTTACAGGGAATCTATTGTAAGTTTCTATCGAAGTGGGCT
Bckdhb			NM_199195	branched chain ketoacid dehydrogenase E1, beta polypeptide	-0.801666	-6.54985	0.0329947	-2.41864	-0.859355	0	-0.286484	-2.66494	3.43588	NA	NA	NA	AGTGCGTGGGCGGTGATCTTAAGACTGTTTCATGACTATAAATACCGGGTGGTGTTGTATTCAATAAAGC
5730427N09Rik			NM_021552	RIKEN cDNA 5730427N09 gene	-1.01335	-6.4646	0.0120562	-0.214475	-0.00449678	59.3465	-0.596647	-4.42377	1.23168	0.947224	0.544914	51.069	ATAAATGCGGTCTTGCTGGTCTGACAGTGACGTCACTCATACACGTCATTCCACTCACTGCTGAAGACCA
bsid(958942)	Myg1		NM_021713	Mus musculus melanocyte proliferating gene 1 (Myg1), mRNA.	-0.642789	-6.44688	0.00724727	-0.212654	-0.00508336	59.3583	-0.291695	-2.13021	9.96232	0.00584812	-0.125679	80.2858	AGGGTTCAGGCGAGCAATGGACCTGGTACAAGAGGAGTTTCTGCAAAGACTAAACTTCTACCAGCACAGC
Ard1			NM_019870	Mus musculus N-acetyltransferase ARD1 homolog (S. cerevisiae) (Ard1), mRNA.	-0.793863	-6.33167	0	-1.44368	-0.49477	15.7387	-0.281818	-2.16664	9.25546	0.0227418	-0.0903566	82.1045	ATGAACATGCAGCACTGCAACCTTCTCTGCCTGCCGGAGAACTACCAGATGAAGTACTATTTCTATCATG
Gpi1			NM_008155	glucose phosphate isomerase 1	-0.900177	-6.24703	0	-0.138409	0.0209834	58.5881	-0.601894	-4.57722	1.22084	0.395102	0.461217	59.7378	ACTACGCACCCTCCCTGTTGAAGCTGATGGAAGGGCTTTGACGTGTCATGTTGTTCTGACCTGTATTTCA
Npm1			NM_008722	nucleophosmin 1	-1.55444	-6.2042	0	-1.78707	-0.626909	5.77712	-0.764822	-3.96041	1.2112	-0.732151	-1.23609	2.90042	GTACGAGATACCCCAGCCAAAAATGCACAAAAATCAAACCAAAATGGAAAAGACTTAAAACCATCAACAC
Eif2a			NM_001005509	DNA segment, Chr 3, ERATO Doi 194, expressed	-0.912755	-6.14163	0	0.491752	0.257406	36.123	-0.650989	-4.63349	1.20862	0.126846	0.0855474	85.1185	CACTATAAGCAAGTCTCTTAAGCCCATGGTGTTCATGGAATTGCCATATGCCCACTGTTAACATCAGTCT
Scye1			NM_007926	small inducible cytokine subfamily E, member 1	-0.910313	-6.11906	0	-0.225287	-0.00928551	59.4359	-0.551311	-4.14498	1.20915	0.0556188	-0.0197265	84.5808	CAAGCCTATCGACGCATCGCGTCTGGATCTTCGAATTGGTTGTATTGTTACTGCCAAGAAGCACCCTGAT
2610528E23Rik			NM_025599	RIKEN cDNA 2610528E23 gene	-0.786946	-6.02331	0	-2.49057	-0.88469	0	-0.213812	-1.44837	33.7327	-0.265152	-0.59304	37.4814	CAGTTGCCAACATATTGCAAGCACTCAGTAACTTACTCCACCGTAATCATGTTAAGTCCATCACCCAGTG
2610201A13Rik			mSQ017047	RIKEN cDNA 2610201A13 gene	-0.917963	-6.00715	0	-2.0789	-0.722077	1.45403	-0.463004	-2.44512	5.2438	-0.558179	-1.08027	6.5918	TTTGGATTCTGGGAATAGGTTAAAATTGCAGGCTATCAACCAGTAGAATAGTTGAGTCTTAGAGACTTTA
Nob1			NM_026277	RIKEN cDNA 1700021I09 gene	-0.827297	-5.9913	0	-2.06807	-0.717367	1.61875	-0.422847	-3.37177	1.44633	-0.852654	-0.907342	13.8735	GTCTGTGACTATCAATGACGATGGGACCTTGCACATGCATTTCTCCCGAAACCCGAAAGTTCTGAACCCA
Rpl19			NM_009078	ribosomal protein L19	-1.27441	-5.93908	0	-0.292	-0.036266	59.6169	-0.64087	-3.29028	1.53114	0.137696	0.128765	84.201	CTCGTGTCTGTACATAGCGGCCTGGCTGTGGCCTCATGTGGATCAGTCTTTAAAATAAAACAAGCCTTTG
Lrrc46			NM_027026	RIKEN cDNA 1700006D24 gene	-0.807724	-5.90358	0	1.20133	0.530238	8.48363	-0.311226	-2.2811	7.32799	0.149139	0.126448	84.2666	CTAAAGCTACCTCCTCAACTCAGACTGCCTCTACTACCAAGAAACAGGTTTCCAAGAACCAGAAAAGTTC
Mettl1			NM_010792	methyltransferase-like 1	-1.02355	-5.89283	0	-3.34656	-1.20135	0	-0.165905	-0.850345	69.1968	-0.430485	-1.06663	7.03318	TACGCAATGGGGGAAAGAATTTCCCAGCCGTCTTCCGAAGAATACAGGATCCCCTCCTCCAGGCAGTGAC
Aatf			NM_019816	apoptosis antagonizing transcription factor	-0.749594	-5.88253	0	-2.14212	-0.763228	0.205931	-0.223014	-1.01746	59.2212	0.255591	0.282879	76.0305	TTTCGATCTCTTTTCGGCCAGCTCAACCCTCCTGATGCAGACCGTGGGAAGTGACAGTAGCATCCTCTCA
Ard1			NM_019870	N-acetyltransferase ARD1 homolog (S. cerevisiae)	-0.963769	-5.87412	0	-1.55717	-0.528494	12.7298	-0.386393	-2.87517	2.44043	0.0773977	0.0158401	85.1999	ACCTGGTCCCAACCTTGCCCCATGTGCTTTTACAATAAATGTCACCCAGTGGCCTTGGGAAATTTGTGAA
Vdac1			NM_011694	voltage-dependent anion channel 1	-0.986762	-5.78678	0	NA	NA	NA	-0.534298	-3.33388	1.48316	NA	NA	NA	GTCACACCCTGACAACACTAGGGATCTCAACTGACTCCTCTTGTAGCCTCACCACTATTTTTTAGCAGTT
Ebp			NM_007898	phenylalkylamine Ca2+ antagonist (emopamil) binding protein	-0.754124	-5.78434	0	-0.965688	-0.298655	38.2139	-0.279094	-2.40871	5.64505	-0.435122	-0.94003	12.2015	GGCCACCCCGTTTATTTCTGGTTCTATTTTGTTTTCCTGAATGCTGTATGGTTGGTGATACCAAGCATCC
Hnrnpa1	Hnrpa1		NM_010447	heterogeneous nuclear ribonucleoprotein A1	-1.24454	-5.73213	0	-0.0808294	0.0457473	57.4207	-0.804501	-4.46761	1.23183	0.39575	0.562882	49.2052	TTAAATGTGCTGTGTAAAGTTAGTCTATTCTGAAGCCATCTTGGTAAACTTCCCCAACAGTGTGAAGTTA
Paics			NM_025939	phosphoribosylaminoimidazole carboxylase, phosphoribosylaminoribosylaminoimidazole, succinocarboxamide synthetase	-0.904359	-5.69469	0	-0.599806	-0.151002	54.4546	-0.479447	-2.85783	2.50328	NA	NA	NA	CGTGGAGGGAATCTTTCTAGCTAGTAAAATTGGCATGACACTACTAAATTTATTCTCACGCTCTGTATAG
C1qbp			NM_007573	complement component 1, q subcomponent binding protein	-1.25044	-5.68689	0	-3.28736	-1.16721	0	0.0218064	0.207201	82.5713	-0.274499	-0.386961	58.2129	TGTCTGGAGATTGGGAGCTGGAGGTGAACGGCACGGAGGCTAAATTATTGCGCAAAGTTGCCGGAGAAAA
Rpl8			NM_012053	ribosomal protein L8	-1.12243	-5.65716	0	-2.07303	-0.539402	11.8254	-0.6451	-4.84966	1.12562	-1.28896	-0.931236	12.637	GGCAGAATTGACAAGCCTATCTTAAAGGCTGGCCGTGCCTACCACAAGTACAAGGCAAAGAGGAACTGCT
Ard1			NM_019870	N-acetyltransferase ARD1 homolog (S. cerevisiae)	-0.638388	-5.63929	0	-1.66387	-0.56569	9.78535	-0.246355	-1.8124	18.2736	NA	NA	NA	CAGGATCCTGGCCCCAGTCCAAGCTCCTATCGTCCTTTCCCTGCTTCTAAGTGGCCGCCGAGTGCACGCG
Aprt			NM_009698	adenine phosphoribosyl transferase	-1.12177	-5.63815	0	-1.65017	-0.521181	13.3549	-0.21584	-1.18042	49.1596	0.447493	0.45855	60.01	CGGCCGCCCTTTTGTGAGTGTTATCACTCATTCCTTTGGTCAGCTGATCCGCCGTGCCTGTGGACCCCTG
Npm1			NM_008722	Mus musculus nucleophosmin 1 (Npm1), mRNA.	-1.66614	-5.63566	0	-1.47885	-0.511259	14.2274	-0.796777	-3.44029	1.38932	-0.559363	-1.30216	1.96622	GTACGAGATACCCCAGCCAAAAATGCACAAAAATCAAACCAAAATGGAAAAGACTTAAAACCATCAACAC
Ola1			NM_025942	RIKEN cDNA 2810409H07 gene	-1.03389	-5.5884	0	-1.15967	-0.380175	28.12	-0.480492	-3.10043	1.82963	-0.529991	-1.05901	7.2891	ATTATCTTCTTCAAATTTAATACACCTCAGCAACCAAAAAAGAAATAAATTCAGTTATTGCTAAGATCGA
bsid(998031)	Myg1		NM_021713	Mus musculus melanocyte proliferating gene 1 (Myg1), mRNA.	-0.676877	-5.56952	0	-0.495046	-0.117779	56.8542	-0.288488	-1.92	14.9985	NA	NA	NA	ATGGCAGACCAAGCTGAGCAGTGCGGGACTTGTCTATTTGCACTTCGGACGTAAGCTCCTGGCCCAGTTG
Gyg	Gyg1		NM_013755	Mus musculus glycogenin 1 (Gyg1), mRNA.	-0.764279	-5.54663	0	0.822719	0.395867	20.0455	-0.489095	-2.95759	2.17666	0.692364	1.09939	9.02686	ACAGATATCACAAAACACCTGCCATTTGTGTATAACCTAAGCAGCATTTCAATATACTCCTACCTCCCGG
Slc25a4			XM_134169	solute carrier family 25 (mitochondrial carrier, adenine nucleotide translocator), member 4	-0.729781	-5.51945	0	-1.00039	-0.31096	36.6742	-0.422613	-3.72046	1.25483	-0.435289	-0.902789	14.118	GTTCACCTGATTAACTGAAGAACTGATGCTGAAAAGTAACTCAGTGTGACTCATTAATAAAGACTACTCA
Rbm3		2	NM_016809	Mus musculus RNA binding motif protein 3 (Rbm3), mRNA.	-0.875302	-5.50276	0	-0.680446	-0.185099	51.3571	-0.385553	-2.32745	6.66409	-0.361442	-0.583303	38.4076	GGGGTTTTGGCTTCATCACCTTCACAAACCCAGAGCATGCCTCAGATGCGATGAGAGCTATGAATGGAGA
Hspa8			NM_031165	Mus musculus heat shock protein 8 (Hspa8), mRNA.	-1.06566	-5.49083	0	-2.08394	-0.617952	6.30048	-0.36528	-1.61668	25.6985	-0.51989	-0.457155	51.0197	GAAGGAAGAATTTGAGCATCAGCAGAAAGAACTGGAGAAAGTCTGCAACCCTATCATTACCAAGCTGTAC
Ndufa10			NM_024197	NADH dehydrogenase (ubiquinone) 1 alpha subcomplex 10	-0.737465	-5.49059	0	-0.81127	-0.233124	46.1726	-0.35854	-2.48111	4.87845	-0.0204907	-0.149301	78.8681	TCCGCCCAGCCGTGTCATAGCCATGGAGATGCCTGCTCTGCCCAACTCTGTGAACTCCAGAGCTTTCCAA
Eif3i	Eif3s2		NM_018799	Mus musculus eukaryotic translation initiation factor 3, subunit 2 (beta) (Eif3s2), mRNA.	-1.05795	-5.45773	0	-1.13192	-0.363516	30.1403	-0.505384	-3.57619	1.30656	0.167522	0.107691	84.7297	ACATCATCATGTTCTCCACAGACAAGCAGATGGGGTATCAGTGCTTCGTGAGCTTCTTTGATCTGCGGGA
Slc25a5			NM_007451	solute carrier family 25 (mitochondrial carrier, adenine nucleotide translocator), member 5	-1.44723	-5.42491	0	-1.70841	-0.583079	8.54278	-0.542362	-2.51464	4.56466	-0.750418	-0.968345	10.8695	TGATGAGATCAAGAAATACACATAATTATGTCCTAGGTGTTCTCCCCGAGAACAGGCATGTTGTATAATA
Srm			NM_009272	spermidine synthase	-0.951743	-5.35978	0	-5.86829	-1.9971	0.0998309	-0.227894	-1.20244	47.8124	-1.14854	-1.50213	0.724985	AGATGCAGCTGAAATACTATAACTCGGACATGCACCGTGCCGCCTTCGTACTGCCCGAGTTCACCCGGAA
Eif3i	Eif3s2		NM_018799	eukaryotic translation initiation factor 3, subunit 2 (beta)	-1.10109	-5.34021	0	-1.63469	-0.496418	15.5842	-0.503757	-2.91698	2.2999	-0.315522	-0.400056	56.8799	TTTGAGTTCGAGTTTGAGGCCTAAGTTCTGGGTCTCCATCCACAACAGAGAAGCTGCTCACAGAAGGTTT
Pcbp2			NM_011042	poly(rC) binding protein 2	-0.649553	-5.32261	0	0.322487	0.201662	42.9017	-0.269963	-1.10735	53.6682	0.495091	0.674564	38.0135	CAGCTAGAACAGAGCAGACCCATCCATAATCCTGCTGTTCACCACCCATGATCCATCTGTGTAGTTTCTG
Atp5c1			NM_020615	ATP synthase, H+ transporting, mitochondrial F1 complex, gamma polypeptide 1	-0.68618	-5.29679	0	-0.593363	-0.15417	54.192	-0.345909	-3.22731	1.61272	-0.306356	-0.705554	27.5158	ATATGATTGACAAATTGACCTTGACTTTCAACCGCACCCGCCAGGCTGTCATCACAAAGGAGTTGATTGA
Tbrg1			NM_025289	transforming growth factor beta regulated gene 1	-0.690347	-5.28222	0	-0.50337	-0.12053	56.6811	-0.293334	-2.6049	3.83633	0.030086	-0.0771249	82.689	CCCCCTGCCTTCTCCTCATTATGAGTTTTAAACGAAAACTCACTCTGTGGAAGGAGGCAGCATCTGAGAA
Ipo4			NM_024267	importin 4	-1.36017	-5.2527	0	-3.23457	-1.17703	0	-0.343654	-1.37954	37.4404	0.0469504	-0.036308	84.1447	GCTGTTTTAACAGGGGTGTCTCTGGGGCTGGACATCATACTATAATAAAGCAGAGCTGTGACATCATACT
Cct2			NM_007636	chaperonin subunit 2 (beta)	-1.08286	-5.24017	0	-1.03372	-0.319607	35.5915	-0.670406	-3.59474	1.29811	-0.570349	-1.12559	5.27252	TGGAAGTTGCAAACTTATTGAAGAAGTTATGATCGGGGAAGATAAACTCATTCACTTTTCTGGGGTTGCC
Nap1l1			NM_015781	Mus musculus nucleosome assembly protein 1-like 1 (Nap1l1), mRNA.	-0.978332	-5.23205	0	-0.973056	-0.275247	41.1223	-0.59176	-3.11731	1.79637	-0.514101	-0.721756	26.2101	GAGTTTGTTCTACCTAGCACCCTAGCTCTAGCTCTGTCAGATACGTTAATGCATACATCCTCTCTAATGC
Qtrt1			mSQ015683	queuine tRNA-ribosyltransferase 1	-0.759737	-5.20101	0	-2.63298	-0.965935	0	-0.247925	-1.8068	18.4588	-0.346782	-0.83148	18.3283	CGCAGCAGTATCTTGGAACAGCGCTTTCCTGACTTTGTACGAAACTTCATGCGCACTATGTATGGTGACC
Prdx3			NM_007452	peroxiredoxin 3	-0.784799	-5.19072	0	-1.47801	-0.505493	14.7472	-0.390262	-2.80241	2.72447	-0.611377	-1.24912	2.6903	TCGTCAAGCACCTGAGTGTCAACGACCTTCCGGTGGGCCGCAGTGTGGAAGAAACACTCCGTTTGGTAAA
Tufm			NM_172745	Tu translation elongation factor, mitochondrial	-0.775537	-5.17815	0	-1.56354	-0.548913	11.0646	-0.397522	-2.73169	3.05827	-0.292142	-0.761538	23.1579	CATTCCCACTGTGGGCATAAGGCTGCCCTGGTCAGCGTTCCCACTGTGGACACAGGCTGTATCCAGGCAG
Hadh	Hadhsc		NM_008212	L-3-hydroxyacyl-Coenzyme A dehydrogenase, short chain	-0.617315	-5.17385	0	-0.324462	-0.0478816	59.5226	-0.480634	-4.12786	1.20828	-0.132638	-0.352211	61.7061	GCCATACAGTAGTATTGGTGGACCAAACGGAAGACATCCTGGCAAAATCCAAGAAGGGAATTGAGGAGAG
Eif3eip	Eif3s6ip		NM_145139	Mus musculus eukaryotic translation initiation factor 3, subunit 6 interacting protein (Eif3s6ip), mRNA.	-1.30214	-5.15744	0	-0.0108039	0.0677419	56.0593	-0.986547	-4.45792	1.232	NA	NA	NA	CATATTGCAGACACCAAAGTTGCCAGACGCTATGGGGATTTCTTTATCCGACAGATCCACAAGTTTGAAG
Psat1			BC005657	Mus musculus phosphoserine aminotransferase 1, mRNA (cDNA clone MGC:12123 IMAGE:3710326), complete cds.	-0.886913	-5.13326	0	-1.54441	-0.503297	14.9476	-0.505861	-3.23222	1.60578	-0.402609	-0.627906	34.2407	CATTGGCAACGCCAAAGGAGACGAAGCTTTGGAAAAGCGGTTTCTTGACAAGGCGGTAGAACTCAACATG
Vim			NM_011701	vimentin	-1.26009	-5.12256	0	0.538798	0.276509	33.7784	-0.800939	-3.73485	1.25095	0.122778	0.0830322	85.1517	CAGGAGCGCAAGATAGATTTGGAATAGAAAGAAGCTCAGCACTTAACAACTGACACCCCAAAAGACGTAG
D5Wsu178e			NM_027652	DNA segment, Chr 5, Wayne State University 178, expressed	-0.678506	-5.09244	0	-2.31659	-0.854796	0	-0.351849	-2.72326	3.10241	-0.387638	-0.959692	11.2654	ATTTTAAAATTCTAATCATTGTCGTCCAGGCTGTCGAAGATAAGCCCAGGGGCTTACGTGTATCTGGAGA
Utp14a			NM_028276	UTP14, U3 small nucleolar ribonucleoprotein, homolog A (yeast)	-0.912745	-5.07792	0	-1.62786	-0.532463	12.3967	-0.421586	-1.90011	15.565	-0.691403	-1.14349	4.81074	GCTGGTTTTTCCTCTAGAGAAGGAGCCATCTTCTTTTGCTCCCATGGAACATGTGTTTCGTGAGTGGAAG
Psat1			NM_177420	phosphoserine aminotransferase 1	-0.992908	-5.0331	0	-1.85595	-0.622776	6.01597	-0.481506	-2.80486	2.71399	-0.825701	-1.45833	0.837889	TGCCTATGCCTTTATATTTCTAATGAAACAGTTTTGTTCAGCCCATGACTTTGTGCATGACTGTCGTCCG
Hsp90ab1	Hspcb		NM_008302	heat shock protein 1, beta	-1.16325	-5.03239	0	-0.724225	-0.187017	51.1666	-0.694507	-3.40037	1.42116	-0.233355	-0.383612	58.5526	TCGCGCATGGAAGAGGTGGATTAAAGCCTCCTGGAAGAAGCCCTGCCCTCTGTATAGTATCCCCGTGGCT
bsid(975188)	6230425C22Rik		XM_109904	RIKEN cDNA 6230425C22 gene	-0.508335	-5.02465	0	-2.2332	-0.781522	0	-0.186437	-2.02513	12.2704	-0.544788	-1.04846	7.65442	CAAGTGTGATAATATATGAATAATGATTTGTGGAATTTAGCAGCAGTGTCTTAATAAATTTATAACTTTG
Naca			NM_013608	nascent polypeptide-associated complex alpha polypeptide	-0.923635	-5.01785	0	-0.738925	-0.213339	48.4036	-0.402526	-2.61716	3.74946	NA	NA	NA	GCTTCCTTCTGCAACAGGCGTGGGTCACGGGCTCGCTCGTTCTCTTTCTGCCGCCATCTTGGTTCCGTGA
Ahcy			NM_016661	S-adenosylhomocysteine hydrolase	-1.10876	-5.01323	0	-0.565012	-0.147263	54.7574	-0.674613	-3.55891	1.31502	0.121497	0.112894	84.6134	TTGAACTCCCTCTTATTTGCCCAAGTGATCAATTTACTGAACCCATTTGACCTGGAAAGCAAATAAAAAC
Fetub			NM_021564	fetuin beta	-0.616976	-5.01222	0	-2.03196	-0.703021	2.14988	-0.174878	-1.18165	49.0837	-0.375572	-0.775791	22.1179	AAGCCCGAGGAGTCCAAGGGAGGGAGCCCTGAGGAAGCCTTTCCTGTGCAGCTGGATCTAACCACCAATC
2810012D02Rik			mSQ010382	RIKEN cDNA 2810012D02 gene	-0.944882	-4.99943	0	-4.3315	-1.65165	0.0303639	-0.213876	-1.03081	58.4001	-0.682975	-1.63811	0.72902	CCTTCCTTGTCTCTACCATGTTGAACTTGATTCCAGAATTTCAGACCTGACTGGCATAGTTGTGTCTCAT
Cd37			NM_007645	CD37 antigen	-0.874611	-4.97481	0	-0.696421	-0.198654	49.9775	-0.202463	-1.10963	53.5266	1.34165	2.35103	1.25385	TGGCCCGGTACCGCTAGGCCCCAGCCCACCCATCGGCACCCACGCACCTCCATGCAGTCAGGAAATGTTT
Eif3i	Eif3s2		NM_018799	Mus musculus eukaryotic translation initiation factor 3, subunit 2 (beta) (Eif3s2), mRNA.	-1.01812	-4.96265	0	-1.2416	-0.365494	29.8985	-0.32507	-1.98477	13.2667	NA	NA	NA	AGTGCCGTCTGGGGCCCCCTCGGGGAGTGCGTCATCGCAGGCCACGAGAGCGGAGAGCTCAACCAGTATA
Acot7	Bach		NM_133348	Mus musculus brain acyl-CoA hydrolase (Bach), mRNA.	-1.22462	-4.96189	0	-1.18192	-0.360111	30.5575	-0.658193	-3.12152	1.7883	-0.0676289	-0.127683	80.1717	GTGTCATCACCATCTCCGGACGCATGACCTTCACAAGCAATAAGTCCATGGAGATTGAGGTCCTGGTGGA
Tubb5			NM_011655	tubulin, beta 5	-1.09807	-4.95481	0	0.69622	0.355208	24.4478	-0.520129	-2.43626	5.33839	0.178253	0.209351	80.8248	CTTAGATCCCTCAGCTTTCTCCAACTGCCCTTTGTCCTCCAGTTTCTTTCTGCTGCCTCTGTCTTGTATT
Uqcrc2			NM_025899	ubiquinol cytochrome c reductase core protein 2	-1.01391	-4.95307	0	-1.00235	-0.308434	36.9906	-0.43603	-2.95028	2.19797	0.523881	0.315209	73.486	CTAGCTGCAGGTTCTTATATGCCACCTTCTACCGTCCTTCAACAGATTGACTCCGTGGCTGATGCTGATG
Eif3m	Ga17		NM_145380	dendritic cell protein GA17	-1.00735	-4.9413	0	-0.493628	-0.109997	57.3177	-0.671156	-3.43614	1.39247	0.273208	0.31228	73.7261	CTACAGATTGGAGCTGATGATGTTGAAGCATTTGTTATTGATGCTGTAAGAACTAAAATGGTCTACTGCA
Hadh	Hadhsc		NM_008212	L-3-hydroxyacyl-Coenzyme A dehydrogenase, short chain	-0.626044	-4.9344	0	-0.838277	-0.252727	43.8629	-0.435265	-3.37381	1.44446	NA	NA	NA	CTGTGCTACCAAGTGCCTATGAATTGACTCTACTAAAATGAAATCTTTTAATTTGTAAACATTGGAATCG
Cct5			NM_007637	chaperonin subunit 5 (epsilon)	-1.11226	-4.91105	0	-1.31003	-0.435992	21.7138	-0.549987	-2.65964	3.46877	-0.483038	-1.11946	5.43835	TCCGTAAGCCTGGAGAATCTGAAGAATAAACTGTACCATTTACCACTGTGACTAAATAAAGGGTGTGTCT
Clta			NM_016760	clathrin, light polypeptide (Lca)	-0.565752	-4.90826	0	0.283202	0.192001	44.0399	-0.164762	-1.26064	44.301	0.0267655	-0.0879475	82.2149	GCTGTTCACGTAATTGGATTAATTATGTTGAGTTCTTTTGGACCAAACCTTTTGTCTTTAGAGTTGATCA
Bzw2			NM_025840	basic leucine zipper and W2 domains 2	-0.698979	-4.90462	0	-2.41889	-0.896568	0	-0.208616	-0.888384	66.9933	-0.513459	-1.23766	2.87443	AAGTGGTATAAAGAAGCACACGCCGCCAAAGGCAAGAGCGTCTTTCTTGACCAGATGAAGAAATTTGTGG
Pdia3	Grp58		NM_007952	glucose regulated protein	-0.756084	-4.89354	0	-2.5715	-0.868005	0	-0.363101	-1.76595	19.8558	-1.20007	-1.66203	0.768359	CAAAGATCCAAATATTGTCATAGCCAAGATGGATGCCACAGCCAATGATGTGCCTTCTCCATATGAAGTC
Aarsd1			NM_144829	RIKEN cDNA 2310044P18 gene	-0.728869	-4.87179	0	-1.61011	-0.503848	14.8972	-0.275655	-1.73602	20.9322	-0.341876	-0.521957	44.4251	GCACACAGAGTGCTGAGGAGTGAGGGGCCAGGACGTCGTCCCTGTGACCAACAGTAAAATATTGTGACTC
Fxyd5			NM_008761	Mus musculus FXYD domain-containing ion transport regulator 5 (Fxyd5), mRNA.	-1.09821	-4.85533	0	NA	NA	NA	-0.236242	-1.05254	57.0596	NA	NA	NA	AGACAGCAGCCCAAACCGAGACCCAGCAACTGACAAAAATGGCCACCTCGAATCCAGTGTCAGATCCAGG
bsid(908150)	Mrpl19		NM_026490	mitochondrial ribosomal protein L19	-0.65979	-4.83903	0	-2.23884	-0.813615	0	-0.196331	-1.51213	30.5092	-0.538513	-1.24337	2.78135	CCTAAAAGTTGCCCTTTGGCTTCTACTGCACATCCTTGCGTATGTGTACTGCAATTACACACACACTTAA
A030007L17Rik			NM_026637	Mus musculus RIKEN cDNA A030007L17 gene (A030007L17Rik), mRNA.	-1.18191	-4.83507	0	-2.29106	-0.827595	0	-0.25087	-1.3508	39.0513	-0.188302	-0.483139	48.3567	CACGGAGGTATAGCTACCATTTTTCAAAGTCCTGGCGACGAAGTGTGGGGAGTGGTATGGAGAATGAACA
Serbp1		1,3	NM_025814	RIKEN cDNA 1200009K13 gene	-0.714179	-4.82647	0	-1.75713	-0.604365	7.13504	-0.265418	-1.63184	25.05	-0.249154	-0.633933	33.6933	AGCAAATGATATAACATCTCAACTGGAGATCAATTTTGGAGACTTAGGCCGCCCAGGACGTGGTGGCAGA
Kars		2	NM_053092	lysyl-tRNA synthetase	-0.659539	-4.82186	0	-1.2605	-0.38919	27.0442	-0.2626	-1.81949	18.0415	-0.145995	-0.310546	65.7668	GGAATACGGGCTGCCTCCCACAGCGGGCTGGGGCATGGGCATTGATCGGCTCACCATGTTTCTCACCGAT
Atp5g2			NM_026468	ATP synthase, H+ transporting, mitochondrial F0 complex, subunit c (subunit 9), isoform 2	-0.909943	-4.81429	0	0.180972	0.146243	49.1389	-0.488038	-3.49614	1.35069	0.264165	0.331991	72.076	GACAGTTGGGGTGGCTGGCTCTGGGGCAGGGATTGGGACTGTTTTTGGGAGTCTCATCATTGGCTATGCC
Fh1			NM_010209	fumarate hydratase 1	-0.869585	-4.78546	0	-1.68077	-0.586071	8.33746	-0.298468	-1.58255	27.2033	-0.384834	-0.846349	17.3908	GACCGCACACAAGAACGGATCAACCTTAAAGGAAACGGCTATTGAACTTGGCTATCTCACAGCAGAGCAG
Ipo7			NM_181517	importin 7	-0.878277	-4.70228	0	-1.38031	-0.466244	18.529	-0.486172	-2.48241	4.86587	-0.43326	-0.943353	12.0397	ATGGTTCCCTCTAAAAACCACTATTGATACCACTGCAGAAATAAGCCAGCAACAACAGGGCAGCGGGGTG
Elovl1			NM_019422	Mus musculus elongation of very long chain fatty acids (FEN1/Elo2, SUR4/Elo3, yeast)-like 1 (Elovl1), mRNA.	-0.982546	-4.70145	0	-1.50712	-0.493758	15.8339	-0.447934	-2.43127	5.39256	NA	NA	NA	ACTTCATCCTATCGCTTGGGCCTCGAATCATGGCTAATCGGAAGCCCTTCCAACTTCGAGGCTTCATGAT
Tcp1			NM_013686	Mus musculus t-complex protein 1 (Tcp1), mRNA.	-0.966462	-4.69382	0	-0.554331	-0.139492	55.3607	-0.740145	-3.71615	1.25603	-0.235814	-0.552372	41.4055	TTCTATTGCCAACATTGTTAAAAGTTCTTTTGGGCCAGTTGGCTTGGATAAAATGTTGGTGGATGATATT
H13			NM_010376	Mus musculus histocompatibility 13 (H13), mRNA.	-0.857311	-4.67726	0	0.159671	0.142449	49.5341	-0.490513	-3.04466	1.95044	0.307127	0.482206	57.5818	GATCTGCTGGAGAAGGGCCTTGAAGCAGACAACTTTGCCATGCTGGGACTTGGAGACATTGTCATTCCAG
bsid(948815)	Fubp3		XM_130112	far upstream element (FUSE) binding protein 3	-0.489181	-4.67529	0	-0.0927786	0.0417934	57.6339	-0.391279	-4.11905	1.20791	0.283653	0.408871	64.9829	GACCTGAGGAACATTCCGTTTGAAACGTGCTCGTTACGGTTTGCCGTTCTTGTTTTCCTTATGATGCTTG
Ctss			NM_021281	cathepsin S	-0.71329	-4.66007	0	-0.788522	-0.224933	47.1101	-0.289382	-1.7855	19.1768	0.668883	1.10524	8.80042	CCAAGTGTGTCGTGATCAATGTGTAGTTACTGTACTAACTAGGTTATAGCTATTTTTACACCCTGTTGTC
Eif3g	Eif3s4		NM_016876	eukaryotic translation initiation factor 3, subunit 4 (delta)	-0.573318	-4.65902	0	-1.68896	-0.569933	9.47437	-0.331037	-2.4859	4.83208	-0.161007	-0.399203	56.9668	GTCCAAGGGTTTTGCTTTTATCAGCTTTCACCGCCGGGAGGATGCTGCACGTGCCATTGCAGGGGTGTCT
Acot7	Bach		NM_133348	brain acyl-CoA hydrolase	-1.19051	-4.64298	0	-1.56693	-0.472698	17.879	-0.691733	-3.08902	1.85296	-1.02075	-1.24457	2.76217	ACTGAGAGCTGGTGTTGTGTGAAGTGTTGAGTGGCAGTGTTCCCTATGGCCCATCCCCAAAACCTGTGCA
Sypl			NM_013635	Mus musculus synaptophysin-like protein (Sypl), transcript variant 1, mRNA.	-0.541168	-4.63418	0	-1.28671	-0.427621	22.633	-0.307191	-2.36995	6.1091	0.224432	0.299391	74.7605	TCCTAGTCCTACAAGATGATGTTTGTGTGTAAGGCACACCTTTTTTGTTGCTTTATTCATGACAAAGTGT
Sars	Sars1		NM_011319	Mus musculus seryl-aminoacyl-tRNA synthetase 1 (Sars1), mRNA.	-0.606475	-4.62124	0	-0.508476	-0.120533	56.681	-0.418444	-3.1356	1.76192	-0.365518	-0.802394	20.253	AAAGAATAATCTCCGTTTCTCTACACAGAACAAGTTGAAGGCAATGTCTTCCCTCTTTTCGCCCAAGAAG
Eef1a1			NM_010106	eukaryotic translation elongation factor 1 alpha 1	-1.24298	-4.60748	0	-0.158206	0.0160586	58.7709	-0.894588	-3.69904	1.26093	NA	NA	NA	TAATAGTAAAAGACTGGTTAATGATAACAATGCATCGTAAAACCTTCAGAAGGAAAGAATGTTGTGGACC
P4hb			NM_011032	prolyl 4-hydroxylase, beta polypeptide	-0.7902	-4.60067	0	-1.11976	-0.312882	36.4336	-0.461562	-2.74528	2.98918	-0.469722	-0.538355	42.7893	CAGGTCTGGACAGCTCTCACTCTCCTCAAGCCAGGACTACCGACCAGCCGGCTATGGGCACATTACTCTG
Impdh2			NM_011830	inosine 5'-phosphate dehydrogenase 2	-1.10294	-4.59216	0	-1.04116	-0.325476	34.8571	-0.712747	-3.29794	1.52225	-0.0613195	-0.207314	74.7694	ACAAGTTCGTTCCTTACCTGATTGCTGGCATCCAGCATTCCTGTCAGGACATTGGTGCCAAGAGTTTAAC
Csl			NM_027945	RIKEN cDNA 1700007H16 gene	-0.973572	-4.58831	0	-0.398211	-0.0803674	58.7128	-0.517353	-2.58678	3.96975	NA	NA	NA	TGAACCGAACTAAGTACTGGGAGCTCACCTATGAAGACTGTATGGACCTGCTTGCCAAGCTTCCGTGTGT
Mrpl24			NM_026591	mitochondrial ribosomal protein L24	-0.605866	-4.57543	0	NA	NA	NA	-0.304963	-2.35442	6.30621	NA	NA	NA	ATGCTGGGAAGCAAGGCAAAGTAGTCCAAGTCGTTCGGCAGCGAAACTGGGTTGTCCTGGAGGGGTTGAA
Rpl7a			NM_013721	ribosomal protein L7a	-1.11346	-4.5651	0	-0.535035	-0.124576	56.418	-0.711447	-3.34938	1.46758	1.21484	0.840175	23.7387	CGTCAAGAAGCAGGAGGCCAAGAAGGTGGTCAACCCTCTGTTCGAGAAGAGGCCCAAGAACTTCGGCATT
Idh3b			NM_130884	isocitrate dehydrogenase 3 (NAD+) beta	-0.687969	-4.55765	0	-1.43727	-0.377368	28.4577	-0.38981	-2.27408	7.43407	-1.27935	-1.06169	7.19833	TGGGTTGTTGCGACAAGGCCCAGACCCTAAGATGATAACTTTTTCCCACAGGTTCGAACCTCAGATATGG
Gyg	Gyg1		NM_013755	glycogenin 1	-0.742999	-4.55605	0	0.314394	0.165284	47.0853	-0.351858	-2.49472	4.74812	-0.0799647	-0.149905	78.8299	GATTCTTTTGATAACATCAAGAGAAAACTTGACACTTACCTGCAATAGAAGCACTGCCATTTTCCTGTGG
Rpl4			NM_024212	ribosomal protein L4	-1.16744	-4.53856	0	-0.448846	-0.0953909	58.0802	-0.751788	-4.15915	1.21	0.136589	0.115625	84.5486	TGTGACTCTTAAATTGTGGATGTTTCCAAGCCCCTTGAAATTAACCTTTTGAAGAACAAGTGGCAAGATG
Sept6	Sept6		BC010489	Mus musculus septin 6, mRNA (cDNA clone MGC:19033 IMAGE:4168214), complete cds.	-0.61667	-4.52793	0	-0.0967861	0.0393016	57.7632	-0.403887	-3.11003	1.81054	0.255965	0.301983	74.5555	ACACCAAGCCCTTCCTATACAAAACACAATTGCTGGAACAGATAGTGTATATTCCCCCTCTCTAATTCTA
bsid(920124)	Rac2		NM_009008	RAS-related C3 botulinum substrate 2	-0.536622	-4.51596	0	-0.381032	-0.0701616	59.0514	-0.122952	-0.490848	86.0719	0.608052	0.925164	17.8624	TCTTTCCCAGTTAGCTGCAGAACTTGCCTCTCTCCTCCACGGAGGTCCCTGGGGATGGGCGGATGTTCAT
Sugt1			NM_026474	SGT1, suppressor of G2 allele of SKP1 (S. cerevisiae)	-0.701597	-4.51239	0	0.218972	0.165274	47.0864	-0.485367	-3.38164	1.4374	0.0631862	-0.0110233	84.7726	GTCTGATGTAGGTAAAAGGAAAGTTGAAATCAACCCTCCCGATGATATGGAATGGAAACAGTACTAAATA
Pdlim2			NM_145978	Mus musculus PDZ and LIM domain 2 (Pdlim2), mRNA.	-0.511121	-4.50892	0	-0.295329	-0.0366938	59.6153	-0.370645	-3.44372	1.38675	0.299077	0.406257	65.238	CAGCAGCCCAAGCGACTCCGCAGTGAGGGTGCTGCTCCATTCCCCAGGACGGCCCTCCAGCCCTAGGTTC
bsid(997634)	BC023488		NM_146238	cDNA sequence BC023488	-0.520552	-4.50829	0	-0.290154	-0.036099	59.6175	-0.154557	-0.994826	60.6083	NA	NA	NA	GTTCATTGAAATTATTGCCTAGCAATACTGCCTATTGTTTTGCATTTTTAATGTCCTTCTTTAAACCATC
Cs			NM_026444	citrate synthase	-0.907423	-4.50254	0	-0.614489	-0.166593	53.1102	-0.583527	-3.02888	1.98787	NA	NA	NA	TTCTTTTTGAACAGCAGTTACACACAGTTCCCACTGAATATCAGATGGATGGACCTAGGGCTTGGGGCCT
Hnrpdl		2	NM_016690	Mus musculus heterogeneous nuclear ribonucleoprotein D-like (Hnrpdl), mRNA.	-0.604315	-4.48067	0	-2.33204	-0.751811	0.519095	-0.298548	-2.32166	6.74364	-0.65632	-0.615406	35.3883	GGCGGCTATGATTATACTGGGTATAACTATGGGAACTATGGATATGGACAGGGATATGCAGACTACAGCG
Isyna1			NM_023627	myo-inositol 1-phosphate synthase A1	-0.857056	-4.4768	0	-1.98818	-0.710454	1.86908	-0.255535	-1.32569	40.4856	-0.36605	-0.863506	16.3482	CCCCGCTTGTGCCCCCGGGCAGCCCTGTAGTGAATGCCCTCTTCCGCCAGCGCAGCTGTATCGAGAATAT
Eif3h	Eif3s3		NM_080635	eukaryotic translation initiation factor 3, subunit 3 (gamma)	-0.960871	-4.43435	0	-0.0831154	0.0385396	57.8019	-0.605589	-4.14334	1.20906	NA	NA	NA	GACGAAATGAGCCAGGACATAATCAAATACAACACGTACATGCGCAACACCAGTAAGCAGCAGCAGCAGA
Rpl10			NM_052835	ribosomal protein 10	-1.18113	-4.42937	0	0.125737	0.11598	52.1408	-0.692149	-2.8481	2.53979	0.740741	0.825138	24.8856	CAGGGTTCACATTGGCCAGGTCATCATGTCCATCCGAACCAAGTTGCAGAACAAGGAACATGTGATTGAG
bsid(958942)	Myg1		NM_021713	melanocyte proliferating gene 1	-0.566516	-4.42264	0	-0.220025	-0.00792799	59.4123	-0.259279	-1.90789	15.3413	-0.125896	-0.391385	57.7633	AGGGTTCAGGCGAGCAATGGACCTGGTACAAGAGGAGTTTCTGCAAAGACTAAACTTCTACCAGCACAGC
Cct8			NM_009840	chaperonin subunit 8 (theta)	-0.787464	-4.40318	0	-2.65191	-0.898236	0	-0.285498	-1.42609	34.908	0.227729	0.141441	83.8103	TTACTTGGGAAAATACTGGGCTATTAAACTGGCCACTAATGCTGCAGTCACTGTACTAAGAGTGGATCAG
Elovl1			NM_019422	elongation of very long chain fatty acids (FEN1/Elo2, SUR4/Elo3, yeast)-like 1	-0.747764	-4.39884	0	-1.24184	-0.403521	25.3642	-0.36618	-2.10587	10.4609	-0.268261	-0.592579	37.5251	CGGCCCTGGGGACTTCTCTCCGGCCCTGATCCCTTTGAACCCTTCACTGCTGCCCGCCTGGTTTCCACTG
Asns			NM_012055	asparagine synthetase	-0.671708	-4.38404	0	-2.56638	-0.884391	0	-0.493357	-3.89348	1.21893	-0.801784	-1.05603	7.39092	GCACTCTCTACACTCTTGTGTAAAAGTAAATGTTTCTTCCGGCTCTGAAGGTCGAGACAGCGACACAATC
H13			AK049101	Mus musculus 0 day neonate cerebellum cDNA, RIKEN full-length enriched library, clone:C230098O20 product:histocompatibility 13, full insert sequence.	-0.713932	-4.3584	0	-0.00052991	0.0762765	55.4549	-0.293045	-1.70086	22.2568	0.357466	0.483201	57.4791	TCCTCGGCCGTAATCCTGCCTCATACGCCGAGGCTCACTCACTTTCCCACAGTCTCGGGCTCCCCTGCCA
Elovl1			NM_019422	elongation of very long chain fatty acids (FEN1/Elo2, SUR4/Elo3, yeast)-like 1	-0.833976	-4.35529	0	-1.70709	-0.597736	7.56023	-0.399523	-2.45658	5.12413	-0.350402	-0.828404	18.5261	TCCCTGCCTTAAACTTGGGAGAGGAACACTCAGGGCTGGCCGGCACGCACCCGGGTCTTGTGGCCTTTCT
Eef1g			NM_026007	eukaryotic translation elongation factor 1 gamma	-1.03811	-4.35452	0	NA	NA	NA	-0.719635	-3.72677	1.25311	NA	NA	NA	CTTGCCAGTCGCCTAGCTGCCTGCACCTACCCTTCAAGGGAGATGGGGGTCATTAAAGAAAACTGAACAT
Tkt			NM_009388	transketolase	-1.12559	-4.34435	0	-1.32345	-0.450045	20.207	-0.577794	-2.35297	6.32486	-0.0309533	-0.215676	74.1137	TACACATTCCAGGGAGGTTCTGGCAGAGGTGGCGAAGGTGTACTGAGTGGGGAGGTAAATATATGTTTTG
Cryz			NM_009968	crystallin, zeta	-0.537896	-4.33738	0	0.433121	0.252117	36.7733	-0.408045	-3.23569	1.60094	0.427146	0.740958	31.8833	GTCATCTCAGTCTGTAAGCCTCTGGAAAGCTTCGGCAAAAATGAGCAATACTTGGGAGACCTCCCAGTCA
Uqcrfs1			NM_025710	ubiquinol-cytochrome c reductase, Rieske iron-sulfur polypeptide 1	-0.743068	-4.32332	0	-0.179447	0.00816519	59.0282	-0.523036	-2.58685	3.96925	-0.213164	-0.573319	39.3664	AATTTCTTTTCGTATCTTGAACTTGAGAAAAGGTGGGGACATTATTTTTCATCTCAAAGTGGATGGGAAA
Nle1			NM_145431	cDNA sequence BC018399	-0.93945	-4.31357	0	-3.24551	-1.20476	0	-0.329282	-1.52001	30.1259	-0.611407	-1.35587	1.4267	ACAGGTCTCCAGTGTGTGACAGTCAGGACATTACAGCGTGGAGCTAAGCCATGGGCACTTCCTGGCAGTG
Mrto4			NM_023536	RIKEN cDNA 2610012O22 gene	-0.71896	-4.31221	0	-3.54649	-1.2371	0	-0.144685	-0.621351	81.0172	-0.967988	-1.46992	0.801132	TGACCCTGCTGTCTGACTATGAAGTATGCAAAGAGGGTGATGTGCTGACCCCAGAGCAGGCCCGTATCCT
Ipo4			NM_024267	importin 4	-1.18131	-4.29915	0	-3.10046	-1.14842	0	-0.317425	-1.17448	49.5239	-0.312206	-0.793112	20.8924	AGGAGTGGCTCACTATAGGTCACCTCTTCAGCTTCCTGCACCAGAACAATCCTGAGCAGGTTGTGGATGT
Naca			NM_013608	nascent polypeptide-associated complex alpha polypeptide	-1.04629	-4.29869	0	-0.794389	-0.236973	45.7261	-0.46829	-2.11018	10.371	-0.262896	-0.686782	29.0729	TCGCAAGCAAACGTATCAAGAGCAAAGGCTGTTCGAGCCCTGAAAAACAACAGTAATGATATTGTAAATG
D5Wsu178e			NM_027652	DNA segment, Chr 5, Wayne State University 178, expressed	-0.687451	-4.29162	0	-2.30924	-0.835778	0	-0.401568	-2.55558	4.21418	-0.417238	-0.987979	10.0073	ATTTTAAAATTCTAATCATTGTCGTCCAGGCTGTCGAAGATAAGCCCAGGGGCTTACGTGTATCTGGAGA
Ndufs2			NM_153064	Mus musculus NADH dehydrogenase (ubiquinone) Fe-S protein 2 (Ndufs2), mRNA.	-0.753215	-4.27785	0	0.00800266	0.0804018	55.1483	-0.510169	-2.90094	2.35206	NA	NA	NA	GACCTACCTCTTGGGCTTCTGGATGACATTTATGAGTTTTCCAAGAACTTCTCTCTTCGGATTGATGAGG
Eif2s3x			NM_012010	eukaryotic translation initiation factor 2, subunit 3, structural gene X-linked	-0.740369	-4.27451	0	-2.00064	-0.677624	3.20359	-0.531928	-3.33781	1.47914	-0.888189	-1.48746	0.755124	TATCTCAGTCTTCCCACACTGGCAAAGAGTATAGCAACTGGTGGTTAGTGATAATTGACAAGGTTCTGTC
Cops2			NM_009939	COP9 (constitutive photomorphogenic) homolog, subunit 2 (Arabidopsis thaliana)	-0.583084	-4.26958	0	-0.929549	-0.240374	45.3284	-0.274707	-1.91733	15.0735	NA	NA	NA	AAGGTTAGACAACCCGAATTCTCAGTGGCACGCTGTCACCTAGGGCTCAAGCAGCAAAATAAACAGTGCA
Gltscr2			NM_133831	glioma tumor suppressor candidate region gene 2	-0.690769	-4.26566	0	1.05718	0.485639	11.7795	-0.573834	-3.82708	1.22997	1.75257	1.65466	0.659248	CCAGAAGGTCACATTCTCCGAGACAGGTTCAAGAGCTTCCAGAAGAGAAATATGATTGAGCCCCGAGAAC
H2-Oa			NM_008206	histocompatibility 2, O region alpha locus	-0.97332	-4.2604	0	0.199346	0.15433	48.2803	-0.502119	-2.11998	10.1691	1.38972	2.27481	1.22241	CTTCTGGAAGCTTCTGCGTGCTCAGCGGCAGCCTGTGACAGTGTTGACCTCGAGTGGCATCAACCTCTGT
A030007L17Rik			NM_026637	Mus musculus RIKEN cDNA A030007L17 gene (A030007L17Rik), mRNA.	-1.04333	-4.23864	0	-2.43458	-0.890738	0	-0.192119	-0.628811	80.6837	-0.502018	-1.13897	4.92429	GTTGTAATAGAAATTAAAGTTTCAACTCGAGAAGGGAAGGAAATAACCTGCCGAAGTTACCTGATGACGA
Rpl4			NM_024212	ribosomal protein L4	-1.12656	-4.23566	0	-0.049444	0.0587971	56.6479	-0.769354	-3.10238	1.82572	0.604412	0.997945	13.6584	CTTAAATTGTGGATGTTTCCAAGCCCCTTGAAATTAACCTTTTGAAGAACAAGTGGCAAGATGTGAGACT
Tcp1			NM_013686	t-complex protein 1	-0.866073	-4.23179	0	-0.653944	-0.179652	51.8897	-0.603144	-3.18337	1.67944	0.149839	0.150503	83.498	GATGAAATGGAGCGCTCTTTACATGATGCTCTTTGTGTGGTGAAGAGAGTTTTGGAGTTGAAATCTGTGG
Canx			NM_007597	calnexin	-0.498742	-4.23004	0	-1.61306	-0.550547	10.9365	-0.302514	-2.28228	7.31033	-0.0704226	-0.272405	69.3018	GTGTAATATTATTACACCACACTGAAATGTATTCAGAAACAGATGTTTCAATTTCATTCTTTCTCCAGAG
Rpo1-1			NM_009085	Mus musculus RNA polymerase 1-1 (Rpo1-1), mRNA.	-0.710931	-4.22562	0	-0.770551	-0.224574	47.1507	-0.609624	-3.84327	1.22697	0.307627	0.453804	60.4935	CCAGTCTCATTTCCAGTCAATACATTTTATTAAATGTGCCACAGACACCTTTGCCTTTGTAAGGCCGTTG
Got2			NM_010325	glutamate oxaloacetate transaminase 2, mitochondrial	-0.801271	-4.22078	0	-1.20038	-0.361898	30.3384	-0.440291	-2.4954	4.74166	0.218607	0.218862	80.2914	CACCATCTGCTCTAATCATGTAGACGTACTGCCGCCTGGTTTCTCTGTTACAATAAAATTACTATAGACC
Imp3			NM_133976	RIKEN cDNA 1190002L16 gene	-0.579316	-4.21837	0	-0.760115	-0.211389	48.6169	-0.419573	-3.80443	1.23451	-0.0439738	-0.171769	77.3794	TACAATGAGGAGCGCGATGACTTTGATCTAGATGCCTAGCGAGTCTTCTTGTCCTGGCTTCTCAGCTACA
Fxr1	Fxr1h		AF124385	Mus musculus fragile-X-related protein 1 (Fxr1h) mRNA, partial cds.	-0.763721	-4.20529	0	0.536359	0.29659	31.3321	-0.557969	-3.19396	1.66257	0.332258	0.486222	57.167	CAGTTGCAGATTATATTTCTAGAGCTGAGTCTCAGAGCAGACAAAGAAACCTCCCAAGGGAAACTTTGGC
Eif3e	Eif3s6		NM_008388	eukaryotic translation initiation factor 3, subunit 6	-0.988172	-4.18527	0	-0.658102	-0.158854	53.7937	-0.617369	-2.81079	2.68891	-0.27328	-0.392023	57.6984	GTCTCGCCCTACCAGCAAGTGATTGAAAAGACCAAAAGCCTTTCTTTTAGAAGCCAAATGTTGGCCATGA
bsid(994724)	Ncl		NM_010880	nucleolin	-1.00453	-4.1762	0	-2.48649	-0.923305	0	-0.324505	-1.34742	39.2431	NA	NA	NA	AGAGGGAACAGTGGCCTTTTTGACTTAAAGGTTGTCAGAGGTCCAGTTTAACTAGGGATAATACAGTGGC
Galns			NM_016722	galactosamine (N-acetyl)-6-sulfate sulfatase	-0.629416	-4.16596	0	-0.116483	0.0313309	58.1496	-0.310948	-1.94542	14.2986	0.333672	0.402936	65.561	GAAATGATGGTGAAGAGACTGAGAGGAAGAATAAAGGAACAGGAGGGGGTTAGCTCTGGTAGCCCCAAGT
Olig2			NM_016967	oligodendrocyte transcription factor 2	-0.839278	-4.15795	0	-0.771086	-0.231379	46.3738	-0.394972	-2.1842	8.93125	-0.332347	-0.865774	16.2135	TCTCTACCGGGCTCCGGGCTGTCCTCGGTCGGATCCATCCGGCCTCCGCACGGCCTGCTCAAGTCACCGT
Rpl10a			NM_011287	ribosomal protein L10A	-1.01872	-4.14919	0	-0.283904	-0.0326035	59.6249	-0.513924	-2.96585	2.15305	0.0942576	0.0507796	85.3757	GATATCCCCCACATGGACATCGAGGCGCTCAAGAAGCTTAACAAAAACAAGAAGTTGGTCAAGAAGCTGG
Impdh1		1	NM_011829	Mus musculus inosine 5'-phosphate dehydrogenase 1 (Impdh1), mRNA.	-0.721174	-4.12838	0	-0.531195	-0.128987	56.1194	-0.627927	-3.62984	1.28383	-0.0554391	-0.21991	73.776	CCGGCTACGTTCCCGAGGATGGGCTCACCGCGCAGCAGCTCTTTGCCAACGCGGATGGCCTCACCTACAA
Ccnd2		4	NM_009829	cyclin D2	-0.436308	-4.12222	0	-3.41494	-1.2056	0	-0.192428	-1.55474	28.4767	-0.768025	-1.24785	2.71018	AGTGCGATGCCATATCAAATCAATGTTGTTCTCTCACGGTGTACTCTCTAACAGGTGTGGGTGGGGTTTA
Prdx6-rs1			NM_177256	peroxiredoxin 6, related sequence 1	-0.80691	-4.11637	0	-2.10081	-0.712459	1.7954	-0.250567	-1.30006	41.9728	-0.694477	-1.18535	3.85207	GTTACGTAGAAAGTCTGTGACATGATCACAGCCGGTCTTATAGATCACTTGCTATACTCCTGGGTCATTA
Krt1	Krt2-1		NM_008473	keratin complex 2, basic, gene 1	-0.831689	-4.10837	0	0.460158	0.255461	36.3621	-0.589623	-3.41086	1.41244	0.148561	0.131262	84.1283	GAGCTGATGAACACTAAGCTGGCCCTGGACATGGAGATTGCCACATACAAGAAACTTCTGGAAGGAGAGG
Prdx6-rs1			NM_177256	peroxiredoxin 6, related sequence 1	-0.733767	-4.10561	0	-1.3867	-0.464915	18.6643	NA	NA	NA	-0.227181	-0.586298	38.1218	GCACTGGGACCTGAGGGTGTCAGCCGACAGCGGTGGGTCCTTGCAGCAGTTACGTAGAAAGTCTGTGACA
Acy1			NM_025371	aminoacylase 1	-0.610552	-4.10377	0	-2.06057	-0.714383	1.72555	-0.175798	-1.0244	58.7946	-0.189856	-0.52026	44.5954	CACACCTGTCCTGCTACATGACCATAATGAACGGCTGCATGAGGATATATTTCTCCGTGGGGTTGACATA
Gpi1			NM_008155	glucose phosphate isomerase 1	-0.867421	-4.08805	0	-0.910791	-0.21844	47.8396	-0.737587	-3.73432	1.25109	-0.191272	-0.19415	75.7704	TCTAACATTGATGGGACCCACATTGCCAAAACACTGGCCAGCTTGTCCCCTGAGACTTCCCTCTTTATAA
Hnrnpa1	Hnrpa1		NM_010447	heterogeneous nuclear ribonucleoprotein A1	-1.24612	-4.08222	0	-0.292268	-0.0371438	59.6134	-0.935975	-3.09787	1.83482	-0.037053	-0.209744	74.5804	TATCAAAATTGAATAACGGTATCAGATAAAATAACAGATGGGAATGAAGCTTATGTATCCATTATCATGT
Dnajc7			NM_019795	DnaJ (Hsp40) homolog, subfamily C, member 7	-0.784063	-4.07299	0	0.908614	0.442088	15.5255	-0.318111	-1.67238	23.3779	-0.45605	-1.01287	8.98474	TGTGTACTTAGAGCAGTTTCGTTTTCTCAGTCGGGTGCCCTGTGTCTGTATGAGGGGTGAAGGAAAGGGG
Esd		1	NM_016903	Mus musculus esterase D/formylglutathione hydrolase (Esd), mRNA.	-0.546811	-4.06563	0	-0.331303	-0.0472431	59.5305	-0.473636	-2.86695	2.46988	0.0492244	-0.0194559	84.5871	CCCTGTGCTGTGTTCTTGGGGCAAAAAAGCTTTTAGTGGATATTTGGGACCAGATGAAAGTAAATGGAAG
Bcs1l			NM_025784	BCS1-like (yeast)	-0.732402	-4.0647	0	-0.566634	-0.142793	55.1088	-0.379227	-2.28698	7.24023	0.903231	0.590792	46.3331	TATAAAAATGACCCCATGGGGGCTGTTCACAACATTGAATCTCTGAGGTGACCCACCAGGCCATGATCTG
Ube2cbp			XM_135023	RIKEN cDNA 2610018I03 gene	-0.735163	-4.05975	0	-1.45736	-0.49361	15.8479	-0.282271	-1.53583	29.3665	-0.167361	-0.441199	52.66	CTGTGTGAACGCAGCGAGGAACTTCACTGGGGAGCTGAATGTTAACCACTCTAAATCCTGGGAAATAAAC
Pgk1			NM_008828	phosphoglycerate kinase 1	-0.665764	-4.05104	0	-0.00915383	0.0724915	55.728	-0.452536	-2.86386	2.48111	0.489953	0.790454	27.6526	AGATGTGGCACAGACCTTAACAGTGCAAGCATCTCAGCTCGTCTTACTGCATCAGATGCTGGTTCTTCAA
Arpc3			NM_019824	actin related protein 2/3 complex, subunit 3	-0.820588	-4.0377	0	0.0187118	0.0826755	54.9753	-0.371042	-0.878261	67.5845	0.381699	0.454251	60.448	CAGCAGCTGAGGCAAGAGACCGGACTGAGGCTGTGTGAGAAGGTTTTTGACCCTCAGAGTGATAAACCCA
Mthfd2			NM_008638	methylenetetrahydrofolate dehydrogenase (NAD+ dependent), methenyltetrahydrofolate cyclohydrolase	-0.607784	-4.03031	0	-1.84931	-0.614606	6.50142	-0.467708	-3.16956	1.70219	-1.06966	-1.71877	0.890551	AGGGCAGCTCGTGCCACCAAAGAACTGTCAGCAGCTGCCTGCACGTCTTTCACGTACCCCGTTGGCTTTC
Ddc			NM_016672	dopa decarboxylase	-0.797285	-4.02728	0	-3.75506	-1.29865	0	-0.273859	-1.68807	22.755	-1.00542	-1.49984	0.729201	CATGATTACATGTGGCGTCATGTGTGTCTCCAACATTAACCAGAAACCTCTGACTGACTTTTTGGTGACT
Elovl5			NM_134255	ELOVL family member 5, elongation of long chain fatty acids (yeast)	-0.573165	-4.01528	0	0.262473	0.174455	46.0592	-0.306903	-2.38715	5.89838	0.224949	0.252382	78.1993	GGTCCTAATTAGCCTTGTGGGTTTTCTGTTTGGAAGGAGTTGCGGCATCTGTTTACATTTCCCTTGTCAG
Ifi30			NM_023065	interferon gamma inducible protein 30	-0.672853	-4.0072	0	-1.35202	-0.454399	19.7496	-0.106349	-0.288445	90.3681	2.27997	1.86283	0.741958	AGCTCATGCATGAGAATGCCCAGCTCACAGATGCCCTACACCCACCCCACGAGTATGTGCCCTGGGTGCT
Ifi30			NM_023065	Mus musculus interferon gamma inducible protein 30 (Ifi30), mRNA.	-0.690088	-3.99306	0	-1.19999	-0.394318	26.4386	-0.0127913	0.536033	68.6966	NA	NA	NA	GAAAAGGAGGCAGCGTTCCTAACCATCGTCTGTATGGAGGAGATGGATGATATGGAGAAGAAACTGGGAC
bsid(877837)	Ncl		NM_010880	nucleolin	-1.10282	-3.97377	0	-2.58149	-0.907479	0	-0.268629	-0.970383	62.0971	-0.750392	-1.37444	1.28045	GCCTTTTTGACTTAAAGGTTGTCAGAGGTCCAGTTTAACTAGGGATAATACAGTGGCCCTTGGCCTGTGT
Nmt1			NM_008707	N-myristoyltransferase 1	-0.530366	-3.96514	0	-1.08632	-0.299696	38.0837	-0.290952	-2.36385	6.18568	-0.685453	-0.808231	19.8572	CTTGACAATTATATTGCGATGGCGTAGGCTGCGTGATGTCACCTTTAGCCATGTTTCTGGTCTCCCTATT
Dhdds			NM_026144	Mus musculus dehydrodolichyl diphosphate synthase (Dhdds), mRNA.	-0.572261	-3.95342	0	-0.274077	-0.0284897	59.6216	-0.245817	-1.63516	24.9098	0.290886	0.374848	68.2355	TGCATCTGCTGCCCTTGGACCTCCAGGAGAAGATTGCGCATGCCATCCAGGCTACTAAGAACTACAATAA
Psmb3			NM_011971	proteasome (prosome, macropain) subunit, beta type 3	-0.381216	-3.94062	0	-1.32148	-0.430532	22.3115	-0.16066	-1.3137	41.1786	-0.0570884	-0.219127	73.8388	CTTTGTAGTCAGTGGTACCTGCTCCGAACAAATGTATGGGATGTGTGAGTCTCTCTGGGAGCCCAACATG
Mrpl4			mSQ025404	mitochondrial ribosomal protein L4	-0.447482	-3.91675	0	-0.899798	-0.278704	40.6956	-0.144113	-0.848966	69.2758	NA	NA	NA	TCTACACATTGTGGATTCCCTGGAGCTACCCACGGCAGACCCCCAGTACCTGACAGAGTTGGCCCAGTAC
bsid(908150)	Mrpl19		NM_026490	mitochondrial ribosomal protein L19	-0.62232	-3.91623	0	-1.9836	-0.648976	4.57718	-0.154488	-0.633921	80.4528	-0.306558	-0.526138	44.0064	CCTAAAAGTTGCCCTTTGGCTTCTACTGCACATCCTTGCGTATGTGTACTGCAATTACACACACACTTAA
Pno1			NM_025443	RIKEN cDNA 1810003N24 gene	-0.695413	-3.91535	0	-3.91675	-1.42681	0	-0.214373	-1.09016	54.7324	-0.696466	-0.778752	21.9055	CCAGGCACTGTGACTATTTCAGGGTTGAGTCATGGCAGAAACTTGCACTATTGAACTATATGTGCTCATC
H13			NM_010376	Mus musculus histocompatibility 13 (H13), mRNA.	-0.767564	-3.91509	0	0.102866	0.122876	51.4889	-0.416846	-2.31152	6.88516	0.185502	0.227871	79.761	TCCTGCACCTGAACAACGTGAGCACTGGCTGTATCCTGCTCGGAGGACTCTTCATCTATGACATCTTCTG
Nptxr		3	mSQ003545	neuronal pentraxin receptor	-0.86531	-3.91442	0	-0.20887	-0.00327275	59.3209	-0.738432	-3.68439	1.26532	-0.217949	-0.431987	53.6071	GTTCTCCTCCCAAATTAGGGACTAGTATCCTCCTTACCCCTTAACTCCAGCTGCCTGCCACCCCTGATCC
Mapk10			NM_009158	mitogen activated protein kinase 10	-0.480161	-3.91206	0	-0.604811	-0.158984	53.7825	-0.308715	-2.28478	7.27292	-0.12987	-0.376293	59.2929	TCTACAAGGAGGTAATGAACTCAGAAGAGAAGACTAAGAATGGCGTAGTCAAAGGCCAGCCCTCGCCTTC
Rpl21			NM_019647	ribosomal protein L21	-1.16106	-3.91177	0	-0.40794	-0.0817809	58.66	-0.592841	-2.53414	4.39341	0.128282	0.116488	84.5275	AAAGAGCAGAGACAGCTTCCTGAAGCGGGTGAAGGAGAATGACCAGAAGAAAAAGGAAGCCAAAGAGAAG
Rpl21			NM_019647	ribosomal protein L21	-1.00061	-3.90853	0	-0.540673	-0.128748	56.1359	-0.534967	-2.63244	3.64497	-0.204582	-0.33844	63.0667	CATGTCGGCAGTGCTTAGGTTGTAGCCCAGGGTTGGAGTCGGCAGTGACAAGCAAATAACTATATTCTTG
Gmds			NM_146041	GDP-mannose 4, 6-dehydratase	-0.420778	-3.90839	0	-1.21034	-0.392407	26.6637	-0.192075	-1.43254	34.5653	-0.0459713	-0.20605	74.8672	ACAGAGGTTTGTAGAGCCTGGGACAGGACACACCAGAGCTAAGGCCGCATTGCTTTTGTCAAAGTCTCCT
Eif4a1			NM_144958	eukaryotic translation initiation factor 4A1	-0.712928	-3.90774	0	-2.1491	-0.748022	0.628474	-0.161663	-0.822077	70.7997	-0.402754	-0.845354	17.4525	ATTGAGACTTTCTACAACACCTCCATTGAAGAGATGCCCCTCAACGTTGCTGACCTCATTTGAGGGGCTG
Dld			NM_007861	dihydrolipoamide dehydrogenase	-0.610099	-3.90289	0	-1.25124	-0.369905	29.3611	-0.221119	-1.36103	38.4742	-0.29132	-0.457777	50.9558	AAAACTACATATAGAAGAATCCTGGAAAGTTTTGACCTGTTTTCATACTGTCTACGAGATTCAACTTCAC
Rpl21			NM_019647	ribosomal protein L21	-1.03481	-3.89512	0	0.0415561	0.0936053	54.1059	-0.590756	-2.64215	3.58062	0.563438	0.848188	23.1406	CATTAGCCACCTCCATAGGCAATGGAGCTAACATTCTTGCTACAGTGGCCGCAGCTCATTAACACCTAAT
Paqr7	Mpra		NM_027995	membrane progestin receptor alpha	-0.741955	-3.88984	0	0.0433204	0.0962812	53.8837	-0.403772	-2.34118	6.4793	0.45141	0.714186	34.2973	CCCCACAACTCATTTATGATTTTGAGATATGACTCCTTAGCTCACTGTTTCCTGGGGCTCCAGGCTTTAG
bsid(976194)	Pmpcb		XM_131914	peptidase (mitochondrial processing) beta	-0.686953	-3.88727	0	-1.13365	-0.322079	35.2821	-0.303341	-2.02724	12.22	-0.562542	-0.71227	26.9701	GAGCGACTACCAGATTTTAACCAGATTTGTAGTAACATGCGTTGGATTCGTGACTAATTTTTGTGATCAA
St13			NM_133726	suppression of tumorigenicity 13	-0.796676	-3.86969	0	-0.935303	-0.293959	38.8002	-0.385777	-2.38179	5.96317	-0.372771	-0.867777	16.0952	TGTAAAAACTTAGGGGAGTCAATTCCTCCATTTTTCTTTACTAACTTGGGCTTTTCCTTTTGAATTACTG
Tbrg1			NM_025289	Mus musculus transforming growth factor beta regulated gene 1 (Tbrg1), mRNA.	-0.693811	-3.86715	0	NA	NA	NA	-0.358096	-2.12671	10.0327	NA	NA	NA	CATCCAAGAAAAAGAAAATGGAGGGAGGTGCTCGAAAACTGGTTCGACCCATTGCCCTGGATCCTTCAGG
Atp5b			NM_016774	ATP synthase, H+ transporting mitochondrial F1 complex, beta subunit	-0.733686	-3.8649	0	-2.27186	-0.827948	0	-0.208304	-0.629214	80.6656	-0.0958256	-0.184338	76.4906	GAAGAGCACGGGTCGTGAGGGACTCCAGCCAAAGGCAGCACTGCAACTGATCTCTCCATATCAAGCGAGA
Eif2a			BC030447	Mus musculus DNA segment, Chr 3, ERATO Doi 194, expressed, mRNA (cDNA clone IMAGE:5400637), containing frame-shift errors.	-0.757154	-3.86391	0	0.779566	0.375029	22.2558	-0.59049	-2.58606	3.97523	0.501754	0.83477	24.1473	TGTCCCACAGAGTGCACCACGGAACACGGTCACCCAGTCTGCTTCTGGTGATCCTGAAGTAGACAAAAAA
Tmed3			NM_025360	RIKEN cDNA 1200002G13 gene	-0.810009	-3.86209	0	-0.865887	-0.261811	42.7666	-0.359714	-1.70078	22.26	-0.00871554	-0.136397	79.662	TCTCATAAGACCGTCTACTTTGACTTCCAAGTGGGTGACGAGCCCCCCATTCTCCCAGACATGGGGAACA
Rnuxa	Phax		NM_019996	phosphorylated adaptor for RNA export	-0.513899	-3.86029	0	-0.268417	-0.0264187	59.6151	-0.162258	-0.933638	64.3124	-0.0116115	-0.11206	81.0307	ACAAGCTATTAAAAGTCTGAACTTCCAGGAGGACGATGACACATCTCGAGAAACGTTTGCAAGTGACACT
Fbxl6			NM_013909	Mus musculus F-box and leucine-rich repeat protein 6 (Fbxl6), mRNA.	-0.588532	-3.85448	0	NA	NA	NA	-0.274834	-2.02273	12.328	NA	NA	NA	AGGCTTCAGCGAGAAGGACTTGGAACAGGCCCTGGCTGTTTTCTCGGGCACCCTGGGGGGCTTACACCCA
bsid(878297)	Gdi2	3	NM_008111	guanosine diphosphate (GDP) dissociation inhibitor 2	-0.616098	-3.84581	0	-0.0233991	0.0699685	55.9056	-0.379343	-2.44964	5.19622	0.0627674	-0.012078	84.7507	CAGACCAGCCCTGGAGCTTTTGGAACCAATTGAGCAGAAATTCGTTAGCATCAGTGACCTCCTTGTACCA
Gpi1			NM_008155	glucose phosphate isomerase 1	-0.879734	-3.84346	0	0.236852	0.160979	47.5592	-0.627693	-2.99469	2.07426	0.507682	0.774216	29.0054	TGTGAGACTGAGTGACAGCCCTGTCATTCTACTTTCCACCATGTTAATTAGGCCCATTTGATGGCCAGTC
Prkcsh			NM_008925	protein kinase C substrate 80K-H	-0.75989	-3.83018	0	-0.709405	-0.179192	51.934	-0.242455	-1.11674	53.0868	0.739382	0.30358	74.4284	AGTGGCCTCCAGAGATGAATAATGAGCTCGCCTACCTTGGATTCCTAAGGGGAGTTAGTCCCTGCACCCA
Rsl1d1			NM_025546	RIKEN cDNA 2410005K20 gene	-0.477531	-3.82197	0	-2.57834	-0.948442	0	-0.230792	-1.75595	20.2105	-0.563882	-1.27638	2.29271	TCAGGAATTCAGAAAGCCAGAGGCCAGTTCCTTCTCTACTCCCAGGAAATCTGGAAAGAAGGCTTCCAAC
Sf3a1		3	NM_026175	splicing factor 3a, subunit 1	-0.652557	-3.81744	0	-0.842581	-0.254179	43.6887	-0.279185	-1.49218	31.4946	-0.0519136	-0.228533	73.0769	TCCATTAGAAGTTGAATACCCAGGGTTGTCCCACAGGACAGTTTCACACTATCGAGTGATGCTTAGTTAA
Atp5d			NM_025313	ATP synthase, H+ transporting, mitochondrial F1 complex, delta subunit	-0.673345	-3.81013	0	-0.493482	-0.0957343	58.0639	-0.275791	-1.6094	26.0142	0.205507	0.134126	84.0424	CGGGCTGAGATCCAGATCCGTATTGAGGCCAATGAAGCCCTAGTGAAGGCCCTGGAGTAGGTGGTACCTA
5730596K20Rik		1	NM_146091	RIKEN cDNA 5730596K20 gene	-0.564643	-3.80928	0	-0.0186486	0.072958	55.6948	-0.274253	-1.96687	13.7287	0.146287	0.165821	82.9087	AGCTTCTGGATTTCTGCCAATGCCATCACGGGTCCAATTCCAGAGGAATGGCAGATCTGAGACCATTCTG
Pa2g4			NM_011119	proliferation-associated 2G4	-0.531243	-3.80704	0	-2.00423	-0.704425	2.09589	-0.289705	-1.8002	18.679	-0.702147	-1.46537	0.814917	GGGGTTGTAGAGAAGTTACAATTTGTACCTCTGGCATGCTGTCCCAGGGAACTAAGGCTGAGGTTTTTGA
Surf1			NM_013677	surfeit gene 1	-0.602699	-3.80229	0	-0.123314	0.0296943	58.2238	NA	NA	NA	-0.0301782	-0.167389	77.6798	GTCGGAAATGGAAGCTGAAACTTATTGCAGAATTAGAGTCTCGAGTCATGGCTGAGCCCATCCCTCTACC
Gdi2	Gdi3	3	NM_008112	guanosine diphosphate (GDP) dissociation inhibitor 3	-0.664834	-3.78479	0	-0.161007	0.0156959	58.7837	-0.368007	-2.36961	6.11329	0.00909585	-0.125359	80.304	CCCCCGGACCAAGCTGCAATGCAGTATTAATCTGACAGAGCCTCAATGTCAACGATGCCTGTTCCAAAAT
3300001P08Rik			NM_026313	RIKEN cDNA 3300001P08 gene	-0.554854	-3.77898	0	-1.09652	-0.357608	30.8651	-0.264173	-1.16359	50.1932	-0.401746	-0.913565	13.5439	AAGTTTGTGAAGTGTGTGGAGCCTTTTTGATAGTAGGAGACGCCCAGTCCCGAGTAGATGACCATCTGAT
Apex1			NM_009687	apurinic/apyrimidinic endonuclease 1	-0.408552	-3.77723	0	-2.2507	-0.723791	1.39524	-0.104334	-0.463426	86.9241	0.160309	0.113038	84.61	TTCCAGAAAGCCTCTTGTGCTATGTGGGGATCTCAATGTGGCTCATGAAGAAATTGACCTCCGTAACCCC
Bahcc1			NM_198423	cDNA sequence BC060615	-0.78512	-3.77132	0	-0.289031	-0.0360745	59.6176	-0.494587	-2.58218	4.00464	0.00953796	-0.132614	79.886	CAGGGTGCAGGCGGCCCCCGGCCCCCTCCGTCCCCACCAGCTCTCGGCCCCTTCCTTATCCTCCAGGGCA
Ctps			NM_016748	cytidine 5'-triphosphate synthase	-0.553076	-3.76326	0	-4.00665	-1.20604	0	-0.222061	-1.42285	35.0811	-1.64764	-1.38487	1.20665	CACGGAATTTTAGGGTAACCGGTTCTAAAGCCCTCTCTTGTGTGTGCACCGTTGGCTTGAAGGTATTTTT
Cryz			NM_009968	Mus musculus crystallin, zeta (Cryz), mRNA.	-0.535211	-3.76274	0	0.306466	0.199968	43.1024	-0.193092	-0.349025	89.5742	0.127508	0.118024	84.4895	TCTGCTACAGCACCGTCTCTGGTGGCTACGCGGAATTTGCTCTTGCAGCCGATGACACTATCTACCCCCT
Clec2h	Clrf		NM_053165	C-type lectin related f	-0.716299	-3.7608	0	0.61375	0.313887	29.2522	-0.473781	-2.91877	2.29422	0.67248	1.03225	11.9376	TTCAAATGGCATACACACGTATGGAATTCTCAAAAAAGATGAGACTCTCGCCTCGCCCCCTGCTGTCTCC
Hnrnpc	Hnrpc		NM_016884	heterogeneous nuclear ribonucleoprotein C	-0.529399	-3.75787	0	-1.38203	-0.446657	20.5659	-0.0374007	0.0699013	86.8717	-0.758218	-1.3193	1.77424	CTCCCTGTGTTCATTAATTCATGATTGCCCTGCGCCTAGTTACAGTTCCACTTCCTTTGATGCTCCGTAG
Agpat4			NM_026644	1-acylglycerol-3-phosphate O-acyltransferase 1 (lysophosphatidic acid acyltransferase, delta)	-0.680112	-3.75115	0	-0.800623	-0.198389	50.0052	-0.300883	-1.65983	23.886	-0.26537	-0.327927	64.0939	CTGGGACAAACACAAACCACAGCCCCTCTGGTCACGGAGTTTTGCCTCAGCGCTGGATGGGAAAGGAAGA
Dcps			NM_027030	RIKEN cDNA 1700001E16 gene	-0.472196	-3.74971	0	-0.371858	-0.0694847	59.0712	-0.21475	-1.72824	21.2198	-0.0334914	-0.216256	74.0677	CCATCGCCGGGGTATCAGATCACTTCGAGATCTCACTCCAGAGCATCTGCCACTACTGAGGAACATTCTC
Hspd1			NM_010477	heat shock protein 1 (chaperonin)	-1.18	-3.73969	0	-3.69975	-1.32099	0	-0.440879	-1.55573	28.4308	0.0715224	0.00283446	85.0244	ATCATCAGTTACTGGTTTCCTTTGACGATATATAATGGTTTACTGCTGTCATTGTCCATGCCTACAGATA
Gnl3	C77032		NM_153547	EST C77032	-0.699383	-3.73912	0	-4.84787	-1.66846	0.0476211	-0.149262	-0.512476	85.3447	NA	NA	NA	TAAGCCATCTGACGGGTCGTCTGCCTTGGATAGAGCGAGTCAAGAGGATGAAACCTATGACTTCACCACA
Gnb2l1	Gnb2-rs1		NM_008143	guanine nucleotide binding protein, beta 2, related sequence 1	-0.990709	-3.73603	0	-0.209905	-0.00395174	59.3352	-0.729528	-2.71566	3.14299	0.112008	0.0931862	85.0039	GACTTGGAGGGCAAGATCATTGTAGATGAATTGAAGCAAGAAGTTATCAGCACCAGCAGCAAGGCAGAGC
9930023K05Rik			NM_172641	RIKEN cDNA 9930023K05 gene	-1.10236	-3.73181	0	-0.680403	-0.182864	51.5773	-0.650884	-2.74969	2.96731	-0.242895	-0.411637	55.6957	GCTTTGGAAGATAGTGATACTCGATCTTCATGACTCTTGAGTTCTGAGCGGTTCGGGGAACAGAACCACA
Actg1			NM_009609	actin, gamma, cytoplasmic 1	-1.10793	-3.72401	0	-1.06543	-0.341362	32.875	-0.611092	-2.26373	7.59332	0.0195624	-0.0924907	82.0052	CACCTGTAAATGTATTCATTCTTTAATTTATGTAAGGTTTTTTGTACTCAATTCTTTAAGAAATGACAAA
Hsp90ab1	Hspcb		NM_008302	heat shock protein 1, beta	-1.50454	-3.72343	0	-0.566303	-0.145217	54.9196	-1.01703	-2.8441	2.55511	-0.293754	-0.730771	25.4993	CGGGAGATGCTGCAGCAGAGCAAGATCCTGAAGGTCATCCGCAAGAACATCGTCAAGAAGTGCCTGGAGC
Hsph1	Hsp105		NM_013559	heat shock protein 105	-0.489243	-3.70783	0	-2.59348	-0.902083	0	-0.241101	-1.84925	17.0925	-0.754607	-1.31148	1.85938	CGGGAGACACACGTGTGGATCATGTGATCATTGTGAACACCTCGTGAGCTTTAAAATAAAGTCCACCCTG
Fbxl6			NM_013909	F-box and leucine-rich repeat protein 6	-0.551188	-3.70761	0	-0.979728	-0.296875	38.4362	-0.273353	-1.73249	21.0623	0.136214	0.125135	84.3029	AACTGCGCATGCTGGACCTTCGAGGCTGCGCTAGGGTCACTCCTAGCGGTCTGTGTCATCTGCCATGTCA
Tmem33			NM_028975	transmembrane protein 33	-0.608457	-3.70133	0	-1.59376	-0.531149	12.5065	-0.27223	-1.17964	49.207	-0.380696	-0.760932	23.2028	CTCCAGAGCATCGCCTTTATCAGCAGACTGGCACCAACAGTTGCGTAGTTTAACATCTAGTTAAGCTGTG
Timm44			NM_011592	translocator of inner mitochondrial membrane 44	-0.539049	-3.70098	0	-0.695851	-0.198375	50.0067	-0.242647	-1.36754	38.1093	-0.227488	-0.576331	39.0761	CAGATCCTCTGAGGGCAGCAATGGAGTCTAGGCAGCTCGAGGCTAGACCATCATGGGACAGACACACAGA
Hspa8			NM_031165	heat shock protein 8	-1.22204	-3.68881	0	NA	NA	NA	-0.518428	-1.81208	18.2842	NA	NA	NA	AAGTCAGTCCAAGAAGAAGGTGTAGCTTTGTTCCACAGGGACCCAAAACAAGTAACATGGAATAATAAAA
Kdelr2			NM_025841	KDEL (Lys-Asp-Glu-Leu) endoplasmic reticulum protein retention receptor 2	-0.560748	-3.68502	0	-1.11743	-0.360037	30.5666	-0.283411	-1.74986	20.429	-0.338464	-0.808732	19.8234	CCTGATCTACATGAAATTTAAGGCCACCTATGATGGAAATCACGATACCTTCCGAGTGGAGTTCCTGGTG
Pdha1			NM_008810	pyruvate dehydrogenase E1 alpha 1	-0.575811	-3.68205	0	-0.203894	-0.00138332	59.2792	-0.601043	-3.52498	1.33332	0.134235	0.0879543	85.0847	TTAAGTATTCACATGAAAACAACCCTAAGCTGTCGGGGAGGCTCTCTTACCGTAGTCGGAGGCACCTTAG
Phb2	Bcap37		NM_007531	B-cell receptor-associated protein 37	-0.644783	-3.67518	0	-1.71007	-0.586478	8.30973	-0.211706	-1.2644	44.0774	0.167449	0.158678	83.193	TCTTGGATTAAGGAAGACTGAGACCAGCCCTTTCAGAGGCTTTCCTCCTTCCTGTGTTGGCTGGGAAGCG
Slc3a2			NM_008577	Mus musculus solute carrier family 3 (activators of dibasic and neutral amino acid transport), member 2 (Slc3a2), mRNA.	-0.438972	-3.67074	0	-2.22137	-0.747181	0.653123	-0.208739	-1.21145	47.2644	-1.82743	-1.37516	1.27521	GAAGGCCCCACTCATGCCGTGGAATGAGTCCAGCATCTTTCACATCCCAAGACCTGTAAGCCTCAACATG
Eef2			NM_007907	eukaryotic translation elongation factor 2	-0.974294	-3.65853	0	-0.198698	0.000471201	59.2357	-0.83254	-3.20996	1.63805	0.375645	0.297675	74.8955	GGCATCCCAGCGCTGGACAACTTCCTGGACAAACTGTAGGCAGCCTGATACTGCCACATGCTGCACAGTG
Eif3k			NM_028659	RIKEN cDNA 1200009C21 gene	-0.868849	-3.65373	0	-0.208445	-0.00326906	59.3208	-0.545924	-2.83661	2.58416	0.103146	0.0676093	85.3054	CAGGTCTTCATCTGCAGCCAGGAAGAGAGCATTAAGCCCAAGAACATCGTGGAGAAGATTGACTTTGACA
Prpf19	Prp19		NM_134129	Mus musculus PRP19/PSO4 homolog (S. cerevisiae) (Prp19), mRNA.	-0.891672	-3.65115	0	-1.32876	-0.41687	23.8362	-0.256655	-0.648077	79.8029	-0.468383	-0.789205	21.1651	CGGTACCTACCTGGCGCTTGGGGGTACAGATGTCCAGATCTACATCTGCAAACAATGGACAGAGATTCTT
Coro1a			NM_009898	coronin, actin binding protein 1A	-1.17279	-3.64707	0	NA	NA	NA	-0.29997	-1.02199	58.9431	NA	NA	NA	ATACCGTGTCAAGGCTGGAGGAGGACGTGAGGAATCTGAACGCCATAGTGCAAAAGCTACAAGAGCGCCT
MGC68323			NM_199472	similar to glyceraldehyde-3-phosphate dehydrogenase (phosphorylating) (EC 1.2.1.12) - mouse	-0.841193	-3.63733	0	-0.618281	-0.161285	53.5824	-0.594378	-2.60675	3.82304	-0.15821	-0.442263	52.5506	TTGGCCCCAACATTGAGCATCTCCCTCACAATTTCCACCCCAGACCCTCATAGTAACAGGATGAGCCTAG
Cd84			NM_013489	CD84 antigen	-0.636491	-3.63575	0	-0.324605	-0.0487307	59.5115	-0.23824	-1.19565	48.2271	0.1595	0.163374	83.0079	TGGCCGTGCTCTTTCTGCTTATTCTCATTCCGATGTTGGCATTTCTGTTCCGTTTGTATAAGAGAAGGCG
Ctsc			NM_009982	Mus musculus cathepsin C (Ctsc), mRNA.	-0.50435	-3.63083	0	-2.02593	-0.711863	1.8172	-0.195888	-1.08592	54.9949	-0.150623	-0.400688	56.8153	TCTAACTGGGGGGAGAGTGGCTACTTCCGTATCCGCAGAGGAACTGATGAATGTGCAATTGAGAGTATAG
Snd1			NM_019776	expressed sequence AL033314	-0.749615	-3.62772	0	-0.440113	-0.0966527	58.0199	-0.401233	-1.71601	21.6781	0.180427	0.232058	79.5063	ATGAGTTTGGCTACAGTCGCTAAGGAGAACTTGCCTGGCCCCCAGCACCGCTGATGCCAGACCTTCTCCC
Ipo7			NM_181517	importin 7	-0.731166	-3.62426	0	-1.22763	-0.405096	25.182	-0.486804	-2.00805	12.6846	-0.396196	-0.831567	18.3227	ACGGTCTTAATGAAGAGCAAAGGAAACAGTTACAGGACATAGCAACTCTAGCTGATCAAAGAAGAGCAGC
Eif3f	Eif3s5		NM_025344	eukaryotic translation initiation factor 3, subunit 5 (epsilon)	-0.944767	-3.62401	0	0.469309	0.257888	36.0638	-0.749626	-2.81676	2.66407	1.40405	1.02589	12.2446	ACCGAAGTGGAGGCAAAGGGTTTCTTTGTGGTCTTGAGTCACGGTGACTCAGTCAGCTGCTTGTGACTCC
Pisd			NM_177298	RIKEN cDNA 9030221M09 gene	-0.426725	-3.61573	0	-1.24506	-0.410778	24.529	-0.19997	-1.35723	38.6881	0.0190138	-0.0936814	81.9492	CTCCTGCAGGAGAAATCACTTAACTTTTTCAACTGTATCAGTAGTACCGTATTTTGTATGAAAAGTAGGA
Btf3			NM_145455	basic transcription factor 3	-0.865964	-3.61222	0	-1.62457	-0.480004	17.1561	-0.374859	-1.62044	25.5363	-0.52778	-0.64077	33.0772	ACAAAGCAGCTGACAGAAATGCTTCCCAGCATCCTCAACCAGCTTGGTGCAGACAGCCTGACTAGTTTAA
Znhit4	Hmga1l4		NM_023547	high mobility group AT-hook 1-like 4	-0.510041	-3.60173	0	0.406363	0.234992	38.8751	-0.313033	-2.36548	6.16511	0.387399	0.576286	47.8215	TTGCAGCCTACAGTGCTACCGCATCAACCTGCAGCTACGGCTGGGAGGGCCCGAGGGCCCGGGGTCCCCA
Sec11a	Spc18		NM_019951	signal peptidase complex	-0.595023	-3.5913	0	-0.447972	-0.0971437	57.9962	-0.193191	-1.15899	50.4768	NA	NA	NA	CATGTGCACCGTGGAGTGCACACAAGGGGACTGTCAATCACAGGGTTTCATATGTTGTCATTGTCACTCT
Prdx6-rs1			NM_177256	peroxiredoxin 6, related sequence 1	-0.678945	-3.59075	0	-1.19003	-0.396099	26.2293	-0.325297	-1.66908	23.5109	-0.279335	-0.675957	29.9917	GAACAGCCAGGAAAATTGCTTCGGGGAATCCATTGTAAGTTTCTATCAAAATGGGCTCAGAAAGCCTTTC
Ctsz			NM_022325	cathepsin Z	-0.502057	-3.59044	0	-0.384111	-0.0708263	59.0317	-0.203247	-1.37672	37.5972	0.156472	0.138653	83.9008	AAGGGAGGCACAGGTGACAGCTACAACCTTGCCATCGAGAGTGCCTGCACATTTGGGGACCCCATTGTTT
Kdelr2			NM_025841	KDEL (Lys-Asp-Glu-Leu) endoplasmic reticulum protein retention receptor 2	-0.547456	-3.58568	0	-1.08643	-0.348882	31.942	-0.298485	-1.68211	22.9898	-0.214878	-0.540027	42.6235	CTTATCTTTTTTATTACTATGTACAAAGATTTTTTTACACAAAGAAACTTAATGCTGTGTTAATAAATTC
Apool			NM_026565	RIKEN cDNA 9430083G14 gene	-0.373641	-3.57845	0	0.606833	0.308566	29.8886	-0.27889	-1.63096	25.0873	0.27605	0.355824	69.9799	TTGCAAACAATGGTGAAAAATCACATAATGAACGGGTAACTGACAAAATGTGACTTGAAATTTTTCCACG
Mdh2			NM_008617	malate dehydrogenase 2, NAD (mitochondrial)	-0.674196	-3.57651	0	-1.07939	-0.344019	32.5449	-0.39751	-2.16243	9.33463	-0.298184	-0.683096	29.3841	TGAGTCAGCATCAGCATCTCTTCCAAATTATGTCTGGTCTGTTGATAATGACAGTAAAGCAGGCTCTGAT
Rpl6			NM_011290	ribosomal protein L6	-1.05958	-3.56839	0	-1.01707	-0.287847	39.5617	-0.621761	-2.34164	6.47331	-0.535073	-0.792746	20.9178	GAACACACCAGAAGTTTGTCATTGCCACCTCTACAAAAGTTGATATCAGCGATGTTAAAATCCCCAAACA
Rpl14			NM_025974	ribosomal protein L14	-1.10265	-3.56641	0	-1.04907	-0.325765	34.821	-0.706994	-2.62878	3.66962	-0.556477	-1.09405	6.16709	GGGGTACCATGACAGTACAACAGTGTCGTTAACCCTAACAAATAAATTTCCCACCAACGGGTGGAATTCC
Fxr1	Fxr1h		NM_008053	fragile X mental retardation gene 1, autosomal homolog	-0.855992	-3.56268	0	0.526586	0.27716	33.6987	-0.637236	-2.4999	4.69951	-0.0808235	-0.265609	69.9088	CTGTGTTAAAAATATATCATCAGATGTGCCTTGAGAATAGTATATGTAACATTAAAAAAAGTTGCTGGCT
Nap1l1			NM_015781	nucleosome assembly protein 1-like 1	-0.43857	-3.56233	0	-0.946338	-0.282407	40.2372	-0.358291	-3.14398	1.74668	-0.105028	-0.291612	67.5474	AGAGGAGAAACGTTTGTTTGAGGTGGTAGTTCTTTCTGTGAGGTTTTAGTATTCGAACTCTTAGAATGTG
Cd48			NM_007649	CD48 antigen	-0.483326	-3.56065	0	-1.34941	-0.404614	25.2377	-0.237021	-1.57997	27.32	NA	NA	NA	CCAGCGAAGCAACTCTGGCTCTATTGGACAAAGGAAAATGTGTTACTGAACGTCTGCGAGAGTTTGCATG
Mrps34			NM_023260	mitochondrial ribosomal protein S34	-0.496046	-3.55677	0	-1.5247	-0.524096	13.104	-0.205539	-0.958894	62.793	-0.396888	-0.850286	17.1478	CAGATGACAGGCTGCTTGGTGTCATTTTCAGGCGGGCCCCTCTCTGATTCCTCGGTCTGGAAATAAACGC
Aifm1	Pdcd8		NM_012019	programmed cell death 8	-0.62245	-3.55599	0	-2.41564	-0.721146	1.48622	-0.279189	-1.11335	53.2963	-1.0397	-1.04691	7.70919	GTAGCTAAACTCTTCAACATTCATGAAGATTGAATCCCAATCGTGGAATACACAAGCACTTTTCCATCCC
Pdlim2			NM_145978	Mus musculus PDZ and LIM domain 2 (Pdlim2), mRNA.	-0.487671	-3.55123	0	-0.204784	-0.00188665	59.2905	-0.355616	-2.20726	8.52185	0.414279	0.643416	41.042	TTGCCCACCTCCAGGGCCTTGGCCACTCCACCCAAGCTCCACACCTGTGAGAAATGCAGCGTCAACATCT
Sec61a1			NM_016906	Sec61 alpha 1 subunit (S. cerevisiae)	-0.636728	-3.54722	0	-1.49887	-0.485011	16.6688	-0.411078	-2.22749	8.17729	-0.807718	-0.837506	17.9445	AGCTGGACCTGGTGGCTTGTGGTTGATGGTCACTATTAGTGGGTGAGTGGGGATGACCTGGCTTCCAAGA
Csda		3	NM_011733	cold shock domain protein A	-0.571978	-3.53869	0	-2.71395	-0.972502	0	-0.441914	-2.61755	3.74678	0.376824	0.22911	79.6862	TTACTGCTATTCTCTACGAAACTAACAACTACAAAGGGAACGAGCCAGCAAGTGTCCATCAAGCTGTATC
Trmt1			NM_198020	DNA segment, Chr 8, ERATO Doi 812, expressed	-0.676555	-3.53635	0	-0.76102	-0.222828	47.348	-0.423161	-1.96463	13.7872	0.217843	0.286587	75.7509	GAAGACGCCAACCCCAGCTCCCGCCAGCGAGGACTTAAGCGCTTCCAGGCCAATCCAGAAGCCAACTGGG
Rps9			NM_029767	Mus musculus RIKEN cDNA 3010033P07 gene (3010033P07Rik), mRNA.	-0.94731	-3.53623	0	0.179548	0.146708	49.0901	-0.559016	-2.38252	5.95435	0.525681	0.816038	25.5953	TCAAGTTTACCCTGGCCAAGATCCGTAAGGCGGCCCGGGAGCTGTTGACGCTAGACGAGAAGGATCCCCG
Top1mt			NM_028404	DNA topoisomerase 1, mitochondrial	-0.623365	-3.53372	0	-1.97138	-0.646691	4.69559	-0.106164	-0.194859	90.7482	-0.509136	-0.790713	21.0596	CTCTTTGCCGCTGAAATGTTCTTTCTCACTGTGAAGCAGTATTGTGGTTTTTCTAGAATAAAATGTCGGG
Mef2b			NM_008578	myocyte enhancer factor 2B	-0.735028	-3.53337	0	-0.70705	-0.192963	50.5659	-0.159117	-0.541756	84.2865	-0.316301	-0.635168	33.5817	TCCGGTCAGCATCAAGTCTGAGCGACTGTCTCCAGTCACTGGGACCTCTGGCGACTTCCCCAGGTCCTTC
Psmf1			NM_144889	proteasome (prosome, macropain) inhibitor subunit 1	-0.535101	-3.53106	0	-0.700671	-0.201326	49.6969	-0.276219	-1.88229	16.0871	0.111638	0.0814435	85.1715	CCCTCCACCCGATGCAGTCGCGGTCACAGCGCTATAAGAACAGAACGCATTTTGGATGTTATTATTAAGA
Tmem33			NM_028975	Mus musculus RIKEN cDNA 1600019D15 gene (1600019D15Rik), mRNA.	-0.583111	-3.52911	0	-1.47555	-0.507466	14.5683	-0.252105	-1.1597	50.4331	-0.344182	-0.798046	20.551	CAGGCCTTGTTAGAGGACAGCTGCCACTACCTGCTGTATTCACTCATCTTCGTCAACTCCTACCCTGTCA
bsid(957003)	Pfc		XM_135820	properdin factor, complement	-0.974755	-3.52785	0	-0.825809	-0.248211	44.4024	-0.0297451	0.683194	62.0218	1.51203	2.73342	1.12312	AGACCCAGAAGAGAAGAAACCCTAAAATCCCTTGCTTCCATTCTGACCCCCTGACTTTCTAGACCACAAT
Rpo1-1			NM_009085	RNA polymerase 1-1	-0.6608	-3.52581	0	NA	NA	NA	-0.584827	-3.10189	1.8267	NA	NA	NA	CCAGTCTCATTTCCAGTCAATACATTTTATTAAATGTGCCACAGACACCTTTGCCTTTGTAAGGCCGTTG
Rps11			NM_013725	ribosomal protein S11	-1.12128	-3.52506	0	-0.372139	-0.0668166	59.1459	-0.529226	-1.85506	16.9122	0.139596	0.131369	84.1252	ACGAAGATGAAGATGCAGAGGACCATTGTCATCCGCCGGGACTATCTCCATTACATCCGAAAGTACAATC
2210016L21Rik			NM_028211	RIKEN cDNA 2210016L21 gene	-0.425469	-3.52269	0	-0.204064	-0.00163178	59.2848	-0.178256	-0.927811	64.6608	-0.100896	-0.321858	64.6819	TTTCTTCACATCCATCCCCGGAGGCCATAAGAAGGAAGCCTCTCCAAGACCCTGCCGGAAGCGCCAGCCC
Rrp12			NM_199447	expressed sequence AA408556	-0.604626	-3.51132	0	-4.52319	-1.65744	0.0365519	-0.237531	-1.04133	57.7517	-0.703144	-1.3841	1.21193	GAAACTATTGTCCTTTGGAGACATTGCCAACATCTAGGAGTGGAAATGTGACGTCGCTACCTCTGAGAAG
Psme1			NM_011189	proteasome (prosome, macropain) 28 subunit, alpha	-0.561265	-3.50156	0	-0.990266	-0.316228	36.0146	-0.0959494	-0.289627	90.3567	0.239519	0.361143	69.4982	ACTATCGGCAGCTGGTGCACGAGCTGGACGAGGCGGAGTACCAGGAGATCCGTCTGATGGTCATGGAGAT
Tk1		4	NM_009387	thymidine kinase 1	-0.524175	-3.4948	0	0.382009	0.233493	39.0585	-0.202483	-1.06796	56.1068	-0.20491	-0.574876	39.2162	TTGTCTTCGTCCCGCCCCCTTTTGAGTTCGCGGGCAAATGCGAGCAGTAAGTCGAAATTTTTCCACCCAC
Nono		2	NM_023144	non-POU-domain-containing, octamer binding protein	-0.864779	-3.48846	0	-0.112089	0.0325566	58.0929	-0.559369	-2.53145	4.41655	-0.441142	-0.880524	15.3555	TTTTATTGGTATACTATGAATTGTTCCAGATACCTTCAGTTTGGAAAGTTTTCTGAGAAATGGAGACGTC
Nup43			NM_145706	nucleoporin 43kDa	-0.504571	-3.48667	0	-1.49569	-0.518711	13.5696	-0.230909	-1.45035	33.6294	-0.572657	-1.41502	1.02491	AAGTAACCAGGCCGGTGTTCACCAGTCTCTAGTAAGTTCCTGGCTCAGCACAGACCCTGCCAAAGACCGA
Slc25a17			NM_011399	solute carrier family 25 (mitochondrial carrier, peroxisomal membrane protein), member 17	-0.512806	-3.48615	0	-0.00920335	0.0741392	55.6101	-0.475426	-3.00334	2.05168	0.0824004	0.0252908	85.2901	GTCTTAATCTTGGTAAAGAGTTCCTCTGAGAATAACATCATGACTGTGCCATGGGCATGACTTTGTTTCC
Mrpl38			NM_024177	mitochondrial ribosomal protein L38	-0.53225	-3.48516	0	NA	NA	NA	-0.269512	-1.61969	25.5688	NA	NA	NA	TGGCCTCTCCCAGGACACCCAGGGGCTTGTGGATGTGCCTCGATTCTATGTGAATAAAATACTTTTTTCC
Psmd4			NM_008951	proteasome (prosome, macropain) 26S subunit, non-ATPase, 4	-0.488671	-3.48279	0	-0.953979	-0.287337	39.625	-0.258026	-1.31937	40.8506	NA	NA	NA	GGACTGTAAAGACGGGGTTGGATAGAGGCTTAGATGTGCTCTGCTGCCTTTATGATGGAATAAAGCTTGG
Ipo5	Kpnb3		NM_023579	karyopherin (importin) beta 3	-0.70056	-3.467	0	-1.78067	-0.58389	8.48689	-0.426559	-2.08821	10.8362	-0.743306	-0.650948	32.1697	AGTGTTTTACCTCCACGCTCTGCAGTGCAGCCTTGGAAGTGTGTCTCCTGTCTTGGAAAGCGCAGTTATA
Pa2g4			NM_011119	proliferation-associated 2G4	-0.611242	-3.46601	0	NA	NA	NA	-0.146913	-0.467051	86.816	NA	NA	NA	CTCTAAACAATATGGCCTGAAAATGAAAACTTCACGTGCCTTTTTCAGTGAGGTGGAACGGCGTTTTGAT
Tsta3			NM_031201	tissue specific transplantation antigen P35B	-0.4155	-3.46486	0	-0.599749	-0.149386	54.5864	-0.258211	-1.32409	40.5779	-0.43045	-0.625825	34.4306	CAGACCAACATTTTGCTTGTCTGCTTCTGCCCAACCTCCATGTGTCCCTGCTGGACTAGAAACCAATAAA
Rps9			NM_029767	ribosomal protein S9	-0.886186	-3.46163	0	0.0784252	0.106944	52.9631	-0.550622	-2.50585	4.64455	0.43958	0.606705	44.7136	AGGATCCCCGGCGTCTGTTTGAAGGCAATGCTCTCCTGCGGCGGCTTGTTCGCATTGGGGTGCTGGACGA
Ndufa10			NM_024197	NADH dehydrogenase (ubiquinone) 1 alpha subcomplex 10	-0.763073	-3.44672	0	-0.754478	-0.219057	47.7708	-0.2917	-1.24817	45.0469	-0.148063	-0.422653	54.566	TGTGGGGTAGTACAGATGATGCTATCCAAAATGAGGGTGCCAGTCCCAGGTGAAAGAGCAGTGGCATCTT
bsid(975452)	Pfkfb1		XM_284750	6-phosphofructo-2-kinase/fructose-2,6-biphosphatase 1	-0.494207	-3.44471	0	0.200934	0.161656	47.485	-0.341549	-2.56209	4.1616	0.481229	0.868087	21.6948	TCCTAGCCATAACTAAGCCTACCTAGTTGTGGATAAAGTTCTTTTTAAATATTCTCTGATGAATAAAGAC
Hspa8			NM_031165	heat shock protein 8	-1.29949	-3.44365	0	-1.87317	-0.579541	8.78881	-0.432467	-1.35814	38.6371	-0.656866	-0.744553	24.4342	AAGTCAGTCCAAGAAGGTGTAGCTTTGTTCCACAGGGACCCAAAACAAGTAACATGGAATAATAAAACTA
Acbd6			NM_028250	acyl-Coenzyme A binding domain containing 6	-0.615233	-3.44232	0	-0.451831	-0.0997176	57.8692	-0.264603	-1.21744	46.9006	0.125546	0.107605	84.7315	ACGGCTGCTTGCCAGAAGAGGTGACGGGCTGCAAAGCGGTCTCTCTGCTGCTGCAGCGGCACAGAGCTAG
Nme2			NM_008705	expressed in non-metastatic cells 2, protein	-0.959911	-3.43573	0	-0.841094	-0.237267	45.6918	-0.324403	-1.22588	46.3891	0.221337	0.245701	78.6416	TGAAGCAGCATTACATCGACCTGAAAGACCGTCCTTTCTTCCCGGGGCTGGTGAAGTACATGAACTCGGG
Ddx52			NM_030096	DEAD (Asp-Glu-Ala-Asp) box polypeptide 52	-0.506889	-3.43241	0	0.0365046	0.0882964	54.536	-0.228687	-1.12629	52.4961	-0.217783	-0.391019	57.8006	ACCTTAGAAGGCAATCCCTGCAGTGTAACTTATGAGCCTGGCATGGATTCTCATGGAGTACTTACAACCA
Spata5			NM_021343	spermatogenesis associated 5	-0.431256	-3.42687	0	-1.72862	-0.617813	6.30877	-0.112122	-0.308397	90.1539	-0.321326	-0.848924	17.2316	GTCACTGAGACGCTTTTATGAAGATTACCAAGAAAAGAGTGGACTACACACAGTCTAAAAAATACTTATG
Ndufs2			NM_153064	NADH dehydrogenase (ubiquinone) Fe-S protein 2	-0.634292	-3.42378	0	0.982281	0.35485	24.4882	-0.453523	-2.82832	2.61703	-0.102673	-0.338017	63.1082	GTTCGAGTTCTATGAGCGGGTGTCTGGGGCCCGGATGCACGCGGCGTATATCCGACCTGGAGGAGTGCAC
Eef2			NM_007907	eukaryotic translation elongation factor 2	-0.951443	-3.42269	0	-0.569183	-0.126365	56.2983	-0.393574	-1.14456	51.3666	-0.0750382	-0.138877	79.513	GCGCCGCTGGCTGCCTGCAGGGGACGCCCTCCTGCAGATGATCACCATCCACTTACCATCCCCCGTCACT
Abhd14b			NM_029631	RIKEN cDNA 1810013B01 gene	-0.600508	-3.42222	0	-0.224742	-0.00959484	59.4411	-0.297798	-1.95889	13.9386	0.216312	0.256878	77.8947	GGGGAGGTGCTCTTCAAATCTCCCTTAGGGGCTGCATACCTCCCCAGGTAATCAAGCACGGATCTTCTCA
Zmiz1		1	NM_183208	Mus musculus cDNA sequence BC065120 (BC065120), mRNA.	-0.548814	-3.41451	0	0.218689	0.168232	46.7579	-0.324342	-2.11394	10.2932	0.150128	0.173795	82.5717	ATGCCCCACGCTGGCAGTTCTGACCAGCCCCATCCCTCCATACAACAAGGTTTGCACGTACCACACCCCA
Rps6			NM_009096	ribosomal protein S6	-0.962322	-3.41383	0	-0.350952	-0.0563471	59.3878	-0.660575	-2.38935	5.872	-0.0780095	-0.214608	74.1983	TGAGAGCTTCTACTTCTAAGTCTGAGTCCAGTCAAAAATGAGTCTTTAAGAGCAACAAATAAATAATGAC
Ctsz			NM_022325	cathepsin Z	-0.443091	-3.41325	0	-0.683001	-0.173428	52.4815	-0.204714	-1.42762	34.8268	-0.443778	-0.690738	28.7409	ATGAGGACCAGAGTGTGGACTGCATCCCGAGAGGAGACGGTAAAGGATGAAACACAACTGCACTGGGACC
Eif3g	Eif3s4		NM_016876	eukaryotic translation initiation factor 3, subunit 4 (delta)	-0.598841	-3.4127	0	-1.42584	-0.47876	17.2782	-0.347534	-1.97961	13.3986	-0.261088	-0.5877	37.9883	CCCAGAGCAAGACAGGGAAGTATGTGCCCCCCAGCCTCCGGGACGGGGCCAGCCGCCGTGGGGAGTCCAT
Was			NM_009515	Wiskott-Aldrich syndrome homolog (human)	-0.466943	-3.41158	0	-0.587717	-0.151963	54.3755	-0.269487	-1.42617	34.9036	0.125392	0.102713	84.8321	GTTTCTTTCCCTCACAGTCCCTTTTGGCTTTGATCTTGCTTTGTGTGTTTTTATTGAGCCTTTCACAAGT
Ddc			NM_016672	dopa decarboxylase	-0.574162	-3.40516	0	-3.17839	-1.19934	0	-0.136166	-0.582929	82.6635	-0.662935	-1.41828	1.0079	AAAAATCCACTTGGTTCCATGTCGTCTCCGAGACAAGTTTGTGCTACGCTTTGCTGTGTGCGCTCGCACT
Mrps35			NM_145573	Mus musculus mitochondrial ribosomal protein S35 (Mrps35), mRNA.	-0.401713	-3.40265	0	-1.15621	-0.330802	34.1914	-0.245134	-1.24961	44.9604	-0.749289	-0.882242	15.2575	AGAAGATGGATACTGATCAGGACTGGCCCAGTGTTTACCCCACTGCCGCGCCGTTTAAACCCTCAGCTGT
D10Wsu52e			NM_145422	DNA segment, Chr 10, Wayne State University 52, expressed	-0.723382	-3.37915	0	0.0319654	0.0919732	54.2397	-0.494356	-2.1898	8.83031	0.12205	0.100289	84.8789	CCCATGGACTGAAATTCCTAAGACATGAGACTCAAGGCCTGACAAGATCCGAATTGCAGAGCTGTTGCTG
Rpl36al			NM_025589	ribosomal protein L36a-like	-0.872633	-3.37797	0	-1.01045	-0.3166	35.968	-0.344175	-1.25778	44.4719	-0.0780083	-0.284612	68.1932	TTGTGTTCTCTGAGAGGAAAATACTGAAGCAGTAGAGAAATGACCTGCTAGAGAATAAAGTTACTGTTAA
Pigk			NM_025662	phosphatidylinositol glycan, class K	-0.649496	-3.37678	0	-0.873923	-0.271011	41.6433	-0.326821	-1.54416	28.9719	NA	NA	NA	CATTGTAAAAGTGAGTAGTAAAGGTGTTAGTTCCCACTAAAGGAAATTACTTCCGTTCATAGGTTTGTGT
Srm			NM_009272	Mus musculus spermidine synthase (Srm), mRNA.	-1.2817	-3.37646	0	-5.17325	-1.56271	0	-0.599217	-1.86731	16.537	NA	NA	NA	TAAAACCTACGGCAACGTGCTGGTTCTGGATGGCGTCATCCAGTGTACTGAGAGGGATGAGTTCTCCTAC
Tfrc			NM_011638	transferrin receptor	-0.619686	-3.36998	0	-2.91521	-1.00996	0	-0.386286	-2.21166	8.44576	-0.625502	-1.02492	8.51715	CTGAGAATGTCACTAGGCTCTCAGGGTCTTGGCACCACTCGCCCAAGTTATATCCACCAGATTATTTTGA
Hspa4			NM_008300	Mus musculus heat shock protein 4 (Hspa4), mRNA.	-0.58624	-3.3593	0	-2.254	-0.785036	0	-0.28435	-2.04591	11.7817	-0.401214	-0.814923	19.4093	GAGCTGACAAGTATTTGCAGTCCTATAATTTCAAAACCCAAACCCAAAGTGGAACCCCCAAAGGAGGAAC
Mybbp1a			NM_016776	MYB binding protein (P160) 1a	-0.51506	-3.35619	0	-3.34758	-1.18248	0	-0.112202	-0.385627	88.8885	-0.518553	-0.954994	11.4843	ACTCAGCACAAAGGAGGTCATAAGAAAGTCCCCCCACCCCCAGTCTGCCCTGCCAAAGAAAAGAGCAAGG
Krt7	Krt2-7		NM_033073	keratin complex 2, basic, gene 7	-0.925704	-3.3521	0	-0.0160097	0.0690436	55.9698	-0.511329	-1.50174	31.0197	-0.143766	-0.310672	65.7547	ACCCCCCATACCCTTTTGTCCATCTCATGTCCCTGTCCCGAGCCTGGAAGATAGTCTGAAACTGCTGTTG
Rpl13			NM_016738	ribosomal protein L13	-1.00865	-3.34859	0	-0.104574	0.0375871	57.8498	-0.555961	-2.24041	7.96438	0.319911	0.426178	63.2751	GAAGGAGTACCGCTCCAAGCTCATCCTGTTCCCCAGGAAGCCTTCTGCTCCGAAGAAGGGAGACAGTTCT
Rps24			NM_011297	ribosomal protein S24	-1.01356	-3.34578	0	-0.391759	-0.0760987	58.8636	-0.639169	-2.38255	5.95391	0.508384	0.784981	28.1045	CTTAGGTGAGTTTTTCTCTATAAAGGCTGTATTTTATCAATTTGTATGGGTCCATGTGGTAATCAGACTT
Ndrg3			NM_013865	N-myc downstream regulated gene 3	-0.531098	-3.34226	0	0.143553	0.132337	50.5625	-0.457811	-3.09784	1.83488	0.262247	0.369041	68.7742	GTAATGTCCCTTTATCAGAGGGAAGGGGACAAACTCAGGGCAGCCCTGTCCAGGTAGAAATATTTTTGCC
Rpl5			NM_016980	ribosomal protein L5	-0.904764	-3.31494	0	-0.461521	-0.098331	57.9382	-0.479874	-2.05437	11.5872	-0.0456436	-0.175026	77.1528	AATGTCTCTTGCCCAGAAGAAAGATCGGGTTGCTCAAAAGAAGGCAAGCTTCCTCAGAGCTCAGGAAAGG
Nol14			NM_029278	RIKEN cDNA 2610033H07 gene	-0.449879	-3.31486	0	-1.75704	-0.577823	8.9095	-0.273768	-1.70298	22.1751	-0.175147	-0.330234	63.8695	GCAGAAAGAAAGCGTAAAGTAAAACAGCTTTTTAATAGCCTGGCCACGCAAGAAGGTGAATGGAAGGCTC
Cryz			NM_009968	Mus musculus crystallin, zeta (Cryz), mRNA.	-0.545228	-3.29417	0	-0.151876	0.0173251	58.7255	-0.525027	-3.1884	1.67137	-0.229078	-0.393392	57.5591	ATGTCTGTTGGTGACAAGGACAAGGGGGTTGATGTGATTATTGAGATGCTGGCGAATGAGAACCTTAGCA
Thop1			NM_022653	thimet oligopeptidase 1	-0.636971	-3.28896	0	-1.78089	-0.634672	5.34058	-0.294713	-1.34645	39.2983	-0.241722	-0.65284	32.0024	CAGCCTGCTGGGCAGCTCAGCAACCCTTGGGCGTACAGATGAGCTTGGGGAAGTTTCCATCCTTGTCCCA
bsid(852988)	IGLV2		J00599	mouse ig lambda2 germline v region.	-0.527374	-3.28459	0	0.347513	0.205621	42.4305	-0.285085	-1.59971	26.4387	-0.408396	-0.566126	40.0625	TCACTTATACTCTCTCTCCTGGCTCTCTGCTCAGGAGCCAGTTCCCAGGCTGTTGTGACTCAGGAATCTG
Tubb5			NM_011655	tubulin, beta 5	-0.983595	-3.27941	0	0.650035	0.280191	33.328	-0.615857	-2.33317	6.58654	0.00199764	-0.0780496	82.65	GCATCGACCCCACCGGTACCTACCACGGTGACAGCGACCTGCAGCTGGACCGAATCTCTGTGTACTATAA
Rps9			NM_029767	ribosomal protein S9	-0.956782	-3.27935	0	0.143489	0.135152	50.28	-0.525857	-2.05259	11.6278	0.135458	0.11932	84.4568	GAAGAGGATTAATTAATACTTGGCTGAACTGGAGGATTGTCTAGTTTTCCAGCTGAAAAATAAAAAAGAA
Acy1			NM_025371	Mus musculus aminoacylase 1 (Acy1), mRNA.	-0.610786	-3.27589	0	-2.42005	-0.872499	0	-0.158036	-0.602761	81.8289	-0.206508	-0.464457	50.2699	TTTACAGAGCCTCGAATGACACCCACGGATGATTCAGATCCCTGGTGGGCAGCTTTCAGCGGAGCCTGCA
Hsp90b1	Tra1		NM_011631	tumor rejection antigen gp96	-0.390169	-3.26579	0	-2.08823	-0.750245	0.563952	-0.201586	-1.1229	52.7056	-0.585016	-1.26426	2.46264	GAAGGATGAATTGTAAATTATACTCTCGCTATGAATCCCGTGTGGAGAGGGAATGTGAAGTTTTGAAGTC
Eif3c	Eif3s8		NM_146200	eukaryotic translation initiation factor 3, subunit 8	-0.573143	-3.25183	0	-0.665569	-0.182232	51.6391	-0.276029	-1.39839	36.4029	0.00879852	-0.121723	80.5077	TCAGACAACCTCCTGAGTTCCCCACTTCAGTCACCCTGTGGACAGACCATCTAACCTTTTTCTCCTAACT
Pcdhgc3			NM_033595	protocadherin gamma subfamily A, 3	-0.523049	-3.2506	0	-0.420288	-0.0835324	58.5927	-0.26573	-1.44471	33.9239	0.147349	0.130176	84.1602	TTACAGTAGTGTAGAAGATCCCCCTCCCCCGCTGGTGTAGAATAGCCAATAGTATAGTGTGGTGTGCTTT
Cr1l	Crry	3	NM_013499	complement receptor related protein	-0.46969	-3.2469	0	-0.880067	-0.268781	41.9166	-0.183233	-1.18652	48.7857	-0.262055	-0.687641	29.0007	ATGTGTATCTCGCTCAATCAGTGGTCTAATTGTTGGAATTTTCATTGGGATAATCGTCTTTATTTTAGTC
Ppib			NM_011149	peptidylprolyl isomerase B	-0.79979	-3.24172	0	-1.89967	-0.450942	20.1124	-0.251791	-1.01993	59.0697	-1.24452	-0.746176	24.3105	GTGTGGGTCCTGTCAATCCCCACACAGACGAAGGTAGCCAGTCACAAGGTTCTGTGCCACCCTGGCCCTA
Npc2			NM_023409	Niemann Pick type C2	-0.843224	-3.23815	0	1.23394	0.55488	6.89671	-0.412124	-2.01601	12.49	0.322767	0.447466	61.1367	GCTGTGTCTTTGTGGTTAGCTCTCGTTCTTTGGTAGTTTTCATTAAAGCCAATACTTGGTTGCAGGTGCT
Nrm			NM_134122	nurim (nuclear envelope membrane protein)	-0.59375	-3.23069	0	0.164357	0.141479	49.6344	NA	NA	NA	0.718248	1.14074	7.51572	CGTCTCCCGATTTTAACTCGGGTTGACTCAGGGCTCCCTGCTCTCCCAAAGGATATGCGCTGCAGAAAAA
Gfm1	Gfm		NM_138591	G elongation factor	-0.493029	-3.22718	0	-1.89443	-0.667413	3.67002	-0.22725	-1.53698	29.3118	-0.528513	-1.1458	4.75347	CGGTTTGTTCTGCAAGATGGAGCACACCACATGGTTGATTCGAATGAAATCTCTTTCATCCGAGCTGGAG
Iars2			NM_198653	RIKEN cDNA 2010002H18 gene	-0.612858	-3.22448	0	-0.319947	-0.0474168	59.5283	-0.326494	-1.6613	23.8261	0.447401	0.703264	35.3053	TGGTGCAAAGTAGCAACCTGATGTCAACAGACGACGACACTCCCCACAGTACTGACTGGCTGAGGAGATG
Hspbap1			NM_175111	Hspb associated protein 1	-0.373242	-3.22376	0	0.0957691	0.117539	51.9952	-0.334555	-2.9578	2.17604	0.417171	0.66166	39.2575	GCTGGACTGCCTAGTTAATCCACAAGTAACCAGGATGGTGGCCCAGCTTTTGATACAAGGAAAAAGCTGT
Kcnmb4			NM_021452	potassium large conductance calcium-activated channel, subfamily M, beta member 4	-0.848108	-3.21058	0	0.903787	0.388829	20.7807	NA	NA	NA	-0.511537	-0.630623	33.9935	CCGAGAGGCCCCTCCCTCGTCGGCAGCAGAAACAGGCACAGTTGGAAGACTGGGGGGACTTAACTGCCTG
Immp2l			NM_053122	inner mitochondrial membrane peptidase 2-like (S. cerevisiae)	-0.476307	-3.20538	0	-0.65387	-0.181508	51.7097	-0.0658024	0.135548	84.9756	0.198908	0.268475	77.0845	TCCCCCGCGGTCACATGTGGGTTGAAGGCGATCATCATGGACACAGTTTTGATAGTAATTCTTTTGGACC
Mrpl9			NM_030116	mitochondrial ribosomal protein L9	-0.520004	-3.20239	0	0.0645408	0.101291	53.458	-0.430007	-2.16137	9.35468	-0.137658	-0.358544	61.0753	AGCTGCACATACGGGGCAGGTTCGCTGTGGTTGTCATCTCCTTCAGTGGTCATCGTAGCCAGCTGTGTTG
G3bp1	G3bp	1	mSQ023090	Ras-GTPase-activating protein SH3-domain binding protein	-0.545283	-3.19659	0	-0.72826	-0.210233	48.7428	-0.257724	-1.18976	48.5871	0.0872253	0.0374112	85.3595	TGCGCCACGCTCTGCTCTGCTGTCTGTCAGGGTTCCTGCTGGGCCAGAAGAGAAATTTGGTTGAGTATCG
Pabpc4		2	NM_130881	poly A binding protein, cytoplasmic 4	-0.668684	-3.19605	0	-0.819106	-0.234664	45.9944	-0.501181	-2.49178	4.77592	-0.241295	-0.621961	34.7844	GCATCCAGCTAAGGTCTGAAGACATCCTAGTTTGTCTGTGGACCTCCACACCAAGAACCAAGTTGCAAAT
Lztr1			NM_025808	leucine-zipper-like transcriptional regulator, 1	-0.47208	-3.19343	0	0.838061	0.407894	18.817	-0.425312	-2.67035	3.40277	0.412403	0.631348	42.2379	AGAATATAAAGCCTATGAGAGTTATTATTAAACTCAGAGCTGCAGCGGCACTAACTGAACAGCCCTCTCA
Rps10			NM_025963	ribosomal protein S10	-0.936854	-3.1906	0	0.0310709	0.089102	54.4717	-0.417301	-1.62371	25.3965	0.0753564	0.0122542	85.1574	AAAAGGATGTCCACATGCCTAAGCACCCGGAGCTGGCAGACAAAAATGTGCCCAACCTTCATGTAATGAA
Pigk			NM_025662	phosphatidylinositol glycan, class K	-0.756342	-3.19058	0	-1.03137	-0.332516	33.9773	-0.366731	-1.50767	30.7275	-0.26709	-0.622907	34.6976	TCAAGACCTATGGGATCAAGCATATGAAGTTCATTTTCTAAGACTCAAGGATGTATGAGGAAGAATGAAT
Esd		1	NM_016903	esterase D/formylglutathione hydrolase	-0.388782	-3.18563	0	-0.223717	-0.00903232	59.4316	-0.272667	-1.47559	32.3304	-0.112949	-0.319161	64.9419	GTGCTGACTTCCTCGCAGAAGATCATGCTCCTGCAGCTGAATCGCTTTTCTGAATAAATATATCAAACTT
Psme1			NM_011189	proteasome (prosome, macropain) 28 subunit, alpha	-0.525762	-3.17814	0	-1.2852	-0.438232	21.4705	-0.0756792	-0.126548	90.4029	0.0423475	-0.054442	83.564	AACCTTCACACCAAGCTGGAAGGCTTCCACACGCAGATCTCCAAGTACTTCTCCGAGAGGGGTGACGCCG
Gpr177		2	NM_026582	RIKEN cDNA 5031439A09 gene	-0.383778	-3.17768	0	-0.566118	-0.141704	55.1926	-0.19935	-1.07943	55.397	0.356031	0.511262	54.57	CCAGGATCATTTTTATCCTGATACGTTTACAAGAACATTTCTAACTTGTATAAATTTACTTTTACCATGT
Glod4			NM_026029	RIKEN cDNA 2700085E05 gene	-0.375848	-3.17228	0	0.13301	0.132712	50.525	-0.2532	-2.38814	5.88644	0.238455	0.330328	72.2183	TCACTCTTGGTAGAGGCAAATTCCTACTGTGTGTAATTGTATTAAATTTGGTAACAAATTTATTGTCCAG
Ogfr			NM_031373	opioid growth factor receptor	-0.399062	-3.16953	0	0.123642	0.129141	50.8794	-0.284128	-1.50925	30.6497	0.200227	0.279151	76.3082	AGACCCTAAGGGTCTAAGGGGATGGGCCTCTTTTCTTCGTCTGGTGCCAAGTGAGGCCTTTTCTGAATAA
Rps13		3	NM_026533	ribosomal protein S13	-1.09342	-3.15254	0	-0.691639	-0.174348	52.3952	-0.668624	-1.90431	15.444	-0.122051	-0.275474	69.0252	CCCCGAGGATCTCTACCATTTGATTAAGAAAGCTGTTGCTGTCCGAAAGCACCTTGAGAGGAACAGAAAG
Rrs1			NM_021511	RRS1 ribosome biogenesis regulator homolog (S. cerevisiae)	-0.377545	-3.14615	0	-2.8833	-0.985729	0	-0.17133	-1.02463	58.7804	-0.307309	-0.498048	46.8382	AAAAGACCCCTTGTTTTAGGAAAACTTTGGCCCTAACTATAATATTAAAAGTATAGTGCTTTTTGGTGTT
Ptplad1			NM_021345	expressed sequence AW742319	-0.330213	-3.14431	0	-2.57622	-0.963325	0	-0.171949	-1.15569	50.6799	NA	NA	NA	GTCAATTATGCCGTATCCCTGTGCAAACTCCCATGTTCTAGTTGCTGTTAGCATCCCCTTTGTTGCTGTC
Wdr4			NM_021322	WD repeat domain 4	-0.43917	-3.13695	0	-3.90162	-1.4779	0	-0.139404	-0.618747	81.1325	-0.679558	-1.49592	0.736855	CTGCATACACTGCAGAACAGAAGGAAATGAACAGAAATCACAGCATCAATAAAGACAAACTTTGCATAGC
Timm44			NM_011592	Mus musculus translocator of inner mitochondrial membrane 44 (Timm44), mRNA.	-0.490714	-3.13318	0	0.718392	0.230338	39.4439	-0.1087	-0.251623	90.6401	1.57885	0.732287	32.656	CACCCTATCCAGCAGGCCAAGGCTCTGGGCTTCCAGTTCCACTCCCGAATTCTGGACATCAGCAATGTGG
Ift88	Tg737Rpw		NM_009376	transgene insert site 737, insertional mutation, polycystic kidney disease	-0.486395	-3.12375	0	0.530819	0.293307	31.7302	-0.271264	-1.54597	28.8869	0.491419	0.881497	20.7523	GCCAAGAAAAGAATTGACGAGGATGATTTTGCTGATGAAGAGTTAGGAGATGACTTGCTCCCAGAATAAT
Bxdc1			NM_023323	brix domain containing 1	-0.353858	-3.12314	0	-3.15089	-1.12524	0	-0.15874	-0.971678	62.0185	-0.607837	-1.10593	5.81792	ACGAGCACTTTCTTATGGTTGTTTACTAAAGAGAATTGCTCTACTTGAGGCTGTTTAAAACAGCCCTGCC
Rpl36a			NM_019865	ribosomal protein L36a	-1.02434	-3.12139	0	0.0104711	0.0818954	55.035	-0.533359	-1.63089	25.0903	0.356085	0.532978	52.3104	TCTTGACCTTTCAACCCCTTTGATTGCAGTTGTTCGTTTGGGAGGGAATACATTAAAAGCTTTCAGAAAT
Atp2a3			NM_016745	ATPase, Ca++ transporting, ubiquitous	-0.522496	-3.11991	0	-1.05389	-0.337722	33.328	-0.293555	-1.69501	22.4835	0.637378	1.01627	12.7191	GGCTTGGCAGGAGCAGAGCGCTGTGCCCACTTGCTGATTGTTTCTGATGGAGAAATAAAGGTGTGTGTCT
Eif2s2			NM_026030	eukaryotic translation initiation factor 2, subunit 2 (beta)	-0.47406	-3.10985	0	-1.53478	-0.532524	12.3917	-0.291137	-1.94071	14.4262	-0.681538	-1.3991	1.11523	TGGCAGATACTGGAGCTGGGCAGCCATTTTTCCTTTTAGTGTCTCTTGAAGCTACATGGCTAGAATAGAT
Blmh			NM_178645	bleomycin hydrolase	-0.396118	-3.10338	0	-0.343843	-0.0523718	59.4579	-0.28758	-2.05518	11.5687	-0.360846	-0.572649	39.431	TCCTTGTTCCTAGAGTAGATTAGGGGAGGGTTAGCTAGGATTTGAACTCTCAACGCTGCATGCTGCCTCA
Hsd17b12			NM_019657	hydroxysteroid (17-beta) dehydrogenase 12	-0.474628	-3.10293	0	-2.02793	-0.731003	1.15459	-0.117606	-0.410206	88.3419	0.226545	0.31091	73.8378	TATAGTGTGCCCGGAATGTAGAGGTAAGTGGGCCAAAGTGTACATCAAGACCAACAACATCCTGTGGTAC
Fcrl1			NM_153090	RIKEN cDNA A230020G22 gene	-0.560846	-3.09995	0	-2.21481	-0.789076	0	-0.209323	-0.916403	65.3403	0.863862	1.62353	0.701688	GCCATGCTTCCTCTGTACACATACCCTAGAGTACTTCTGAGTCACTGTCATCAACTTAGAATTAAAACAC
Ctps			NM_016748	Mus musculus cytidine 5'-triphosphate synthase (Ctps), mRNA.	-0.505862	-3.09855	0	-2.09874	-0.767004	0.107669	-0.248734	-1.27555	43.4151	-0.403056	-0.967185	10.922	CCCTGGGCAAATGGGTGGAACCATGAGGCTGGGCAAGAGGAGAACCCTGTTCCAGACCAAGAACTCAGTC
Uba52			NM_019883	ubiquitin A-52 residue ribosomal protein fusion product 1	-0.822274	-3.09828	0	-0.325528	-0.0450086	59.5557	-0.411287	-1.63425	24.9485	-0.16938	-0.308541	65.9575	ACCATCACTCTTGAGGTCGAGCCCAGTGACACCATCGAGAATGTCAAGGCCAAGATCCAAGACAAGGAAG
Arts1			NM_030711	type 1 tumor necrosis factor receptor shedding aminopeptidase regulator	-0.723055	-3.09693	0	-2.0245	-0.716672	1.64344	-0.450794	-1.95967	13.9178	0.0896802	0.0388116	85.3642	CCATTGAGACCATTGAAGAAAACATACGATGGATGGATAAGAATTTTGATAAAATAAGACTGTGGCTGCA
Tyw1			NM_178897	expressed sequence AW125391	-0.488122	-3.09288	0	-0.782153	-0.227989	46.7624	-0.260778	-1.2965	42.1813	-0.459566	-1.06608	7.05128	TGGAGGGGTCGTGTACACTCACGTTCCCAGTACTCCTTAGAAGTGCTCAAGACACACTTGAACTTGGCTA
Oxa1l			AK044817	Mus musculus 9.5 days embryo parthenogenote cDNA, RIKEN full-length enriched library, clone:B130005E08 product:similar to CYTOCHROME OXIDASE BIOGENESIS PROTEIN OXA1, MITOCHONDRIAL PRECURSOR (OXA1-LIKE PROTEIN) (OXA1HS) [Homo sapiens], full insert sequence.	-0.672163	-3.09207	0	0.504645	0.282303	33.07	-0.401987	-1.90415	15.4486	0.28815	0.41772	64.1135	CCCGATGCCTCGTTTTTCCTCTCATTGTGAAGGGCCAGCGAGAAGCAGCCAAGATCCACAACCACATGCC
Pcdhgc3			NM_033595	protocadherin gamma subfamily B, 6	-0.534919	-3.08991	0	-0.5561	-0.13307	55.8324	-0.262355	-1.28031	43.1337	0.0689477	0.000123705	84.9804	TTACAGTAGTGTAGAAGATCCCCCTCCCCCGCTGGTGTAGAATAGCCAATAGTATAGTGTGGTGTGCTTT
Ndufb5			NM_025316	NADH dehydrogenase (ubiquinone) 1 beta subcomplex, 5	-0.601332	-3.0842	0	-1.68546	-0.431997	22.1505	-0.309051	-1.18022	49.1713	-0.772503	-0.547827	41.8527	TTCATTTGTCTGTCCAAGAACAGTGTGTCCCTCTAGTGGGAAGAAATGAATAAATACTCTGTATTTTTGC
Prmt1	Hrmt1l2		NM_019830	heterogeneous nuclear ribonucleoproteins methyltransferase-like 2 (S. cerevisiae)	-0.392066	-3.08287	0	-2.29422	-0.704503	2.09292	-0.108576	-0.430786	87.8314	-0.306978	-0.278009	68.7957	ACTTCAAGGGTCAGCTGTGTGAGCTCTCTTGTTCCACCGACTACCGGATGCGCTGAGGAGGTGCCAGGCT
Ptplb			NM_023587	protein tyrosine phosphatase-like (proline instead of catalytic arginine), member b	-0.460446	-3.07782	0	-0.790334	-0.239004	45.489	-0.119107	-0.38698	88.8602	-0.189854	-0.509201	45.7088	TCTTCCAAACAGGAGCCTTACTGGAGATTTTACATTGTGCTATAGGGATTGTGTCATCTTCTGTTGTCCT
Eif4b			NM_145625	eukaryotic translation initiation factor 4B	-0.63482	-3.06676	0	0.231386	0.17386	46.1264	-0.522187	-2.72242	3.10686	0.478935	0.890393	20.1413	GAAGTGGGCTTTTGCAGATACCCACAGTTGAATGGGTTTTTTTAAACCATTGTTGTAGACAATGAGAAGG
Rps17			NM_009092	ribosomal protein S17	-1.01296	-3.06434	0	-0.289955	-0.0300182	59.6244	-0.501108	-1.50909	30.6576	0.333466	0.263214	77.4564	TATGTCACGCATCTGATGAAGCGGATTCAGAGAGGGCCTGTGAGAGGCATCTCTATCAAGTTGCAGGAAG
Ctsc			NM_009982	cathepsin C	-0.42005	-3.06333	0	-1.53634	-0.482739	16.889	-0.245539	-1.75036	20.4107	NA	NA	NA	TTTCTATGTGTGTTTACAAGAATTTTTGTCACCTACTTCTTCCCTTAGAAGCATTTATGCTCCATGGACG
Serhl			NM_023475	serine hydrolase-like	-0.441364	-3.06113	0	0.851395	0.423399	17.2872	-0.312403	-1.81779	18.0968	0.383368	0.644417	40.9434	AGAGAACAGCTTTGACTTCGTAAGCAAGGAGATGTTCGTGCACTCTGCGAAGAGCCTGCAGGCCAGCGTG
Pcdhgc3			NM_033595	protocadherin gamma subfamily B, 1	-0.460288	-3.05896	0	-0.561249	-0.139981	55.3238	-0.191492	-0.999458	60.3251	0.228168	0.27832	76.3696	TTACAGTAGTGTAGAAGATCCCCCTCCCCCGCTGGTGTAGAATAGCCAATAGTATAGTGTGGTGTGCTTT
Pcdhgc3			NM_033595	protocadherin gamma subfamily C, 4	-0.55639	-3.0568	0	-0.570159	-0.135376	55.6659	-0.302169	-1.4252	34.9556	0.039369	-0.0405753	84.0177	TTACAGTAGTGTAGAAGATCCCCCTCCCCCGCTGGTGTAGAATAGCCAATAGTATAGTGTGGTGTGCTTT
Lrwd1			NM_027891	RIKEN cDNA 1200011O22 gene	-0.560262	-3.05538	0	0.00199726	0.0795487	55.2125	-0.418231	-2.37791	6.01063	0.0432903	-0.0470253	83.8144	CCTCACTGCCCTGACAGACTCCAACATCGTGTCCATCTGGAGGAGATGCTAGTCTGCCTGCACAAGGCAG
Snrpa			NM_015782	small nuclear ribonucleoprotein polypeptide A	-0.544668	-3.05008	0	-0.872595	-0.263943	42.5074	-0.301494	-1.46327	32.9601	0.620402	0.534594	52.1422	TTCCCCCCCTCCCTTGGCTCAGTCCCTGAAGGTAAGTCCCCCTTAGGGACCTTCTCAGAGCCGTGTGTGT
Adsl			NM_009634	Mus musculus adenylosuccinate lyase (Adsl), mRNA.	-0.478296	-3.04898	0	-1.7945	-0.559177	10.2726	-0.285617	-1.87726	16.2371	-0.153828	-0.269696	69.5446	AAGCAGGAAGGAGGTGACAATGACCTTATAGAGCGCATCCGGGCAGATGCCTACTTCAGCCCCATCCACT
Snrpb2		3	NM_021335	U2 small nuclear ribonucleoprotein B	-0.475102	-3.04365	0	-0.117689	0.0323809	58.1011	-0.227842	-1.58694	27.0064	0.0494837	-0.0385819	84.0778	CATCACTTATTTTTGTATAAACCTGAAAGTGTATGAAACTCAGTAATGGGGTTTAGGTTATTTTGGAGCA
BC003885			NM_198609	cDNA sequence BC003885	-0.406472	-3.04258	0	-2.25811	-0.821045	0	-0.109345	-0.186623	90.7334	-0.575069	-1.04816	7.66496	TCTGCTCCGGGCCGATCTACCCGGGGCACGGAATGATGTTCGTCCGCAACGATTGCAAGGTGTTCCGATT
Hspd1			NM_010477	Mus musculus heat shock protein 1 (chaperonin) (Hspd1), mRNA.	-0.822225	-3.03855	0	-2.93969	-1.0641	0	-0.0696825	-0.0317354	89.135	-0.754542	-1.48504	0.760807	GATGTAAAATTTGGTGCGGACGCTCGAGCCTTAATGCTTCAAGGTGTAGACCTTTTAGCAGATGCTGTAG
bsid(964244)	Rpl18a		XM_194410	Ribosomal protein L18A	-0.904262	-3.03236	0	-0.892381	-0.181273	51.7326	-0.567748	-1.93955	14.4577	-0.296918	-0.210358	74.5325	CTTCTGGTACTTTGTGTCACAGCTGAAGAAGATGAAGAAGTCATCCGGGGAAATTGTGTACTGCGGACAG
Pcdhgc5			mSQ030953	protocadherin gamma subfamily C, 5	-0.435079	-3.03136	0	-0.697773	-0.184047	51.461	-0.191408	-1.00149	60.2006	-0.108277	-0.260996	70.3163	CCCTTACAGTAGTAGTAGAAGATCCCCCTCCCCCGCTGGTGTAGAATAGCCAATAGTATAGTGTGGTGTG
Nek3			NM_011848	NIMA (never in mitosis gene a)-related expressed kinase 3	-0.535799	-3.02579	0	-0.0433609	0.0630099	56.3765	-0.139033	-0.321919	89.9823	0.170739	0.194895	81.5827	GGCAACAGTTACAGCTGTCCAGTGCCTGTTATCCCCAATTACCATGTAACACTCTCACATTTCCTAAAGG
Bxdc1			NM_023323	brix domain containing 1	-0.512118	-3.02056	0.0213186	-4.16778	-1.56123	0	-0.149025	-0.728711	75.8399	-1.41977	-2.75137	3.2063	CGAGCACTTTCTTATGGTTGTTTACTAAAGAGAATTGCTCTACTTGAGGCTGTTCGGTTTCCTGATAAAA
Atad3a			NM_179203	ATPase family, AAA domain containing 3A	-0.538538	-3.0162	0.0508882	-4.34029	-1.57744	0	-0.340337	-1.8812	16.1193	-0.057998	-0.133795	79.8165	GCGTCAGAACTACCGCCTTCCCTCTACTGAGTCCGGGCCTTTTAAATCCAGAATCGAATAAAACTGTGAC
2810017I02Rik			mSQ019390	RIKEN cDNA 2810017I02 gene	-0.389442	-3.01293	0.0731436	-1.64872	-0.582133	8.60825	-0.212053	-1.3912	36.797	-0.577906	-1.39189	1.16028	TTTTGATTTCATAGTGGCCAGCTGCCAGTTTGAGGCGATGTCTGCCCTGGTAAGTACAGTTCGGCTAGTT
Erp29			NM_026129	endoplasmic reticulum protein 29	-0.66385	-3.01171	0.0814979	0.267033	0.181436	45.264	-0.36618	-1.95266	14.1042	0.454496	0.652881	40.1126	TGCCCCCCGCAGGAGTTGGTGCTATAGAGGTAGGGACTACTGCCAGGTCCTTGATGAGTGTAATTCTGAT
Pcdhgc3			NM_033595	protocadherin gamma subfamily B, 4	-0.566533	-3.01162	0.0821178	-0.893394	-0.257853	43.246	-0.269148	-1.26874	43.8193	-0.192285	-0.412416	55.6159	TTACAGTAGTGTAGAAGATCCCCCTCCCCCGCTGGTGTAGAATAGCCAATAGTATAGTGTGGTGTGCTTT
Atp5a1			NM_007505	ATP synthase, H+ transporting, mitochondrial F1 complex, alpha subunit, isoform 1	-0.640868	-3.01138	0.0837691	-1.17489	-0.37514	28.7266	-0.426695	-2.03497	12.037	-0.1925	-0.47531	49.1573	AGCACCATTTGTAAAGGGTTACTCTTGTATTCCTGATGTACAGAAATCACATGAATAAAAGTTCCATACT
Pcdhgc3			NM_033595	protocadherin gamma subfamily A, 1	-0.532133	-3.01059	0.0892005	-0.492561	-0.113047	57.1407	-0.235274	-1.06923	56.0278	0.0537797	-0.0232762	84.4952	TTACAGTAGTGTAGAAGATCCCCCTCCCCCGCTGGTGTAGAATAGCCAATAGTATAGTGTGGTGTGCTTT
Fxyd5			NM_008761	FXYD domain-containing ion transport regulator 5	-0.91229	-3.00643	0.117869	-1.4361	-0.442713	20.9874	-0.236907	-0.621527	81.0094	0.609584	0.508092	54.8996	AGTGATCAACATGAAAGAATCCTGAAAGGAAGAGGCCACTGGAGGGAGTCAGGCTTAAGGCTAATGGTCT
Sod1			NM_011434	superoxide dismutase 1, soluble	-0.670713	-3.00454	0.131029	-1.47287	-0.269683	41.8061	-0.147505	-0.392535	88.7419	0.627292	0.189784	81.8351	AGGACGGTGTGGCCAATGTGTCCATTGAAGATCGTGTGATCTCACTCTCAGGAGAGCATTCCATCATTGG
Snx5			NM_024225	sorting nexin 5	-0.5192	-2.99896	0.169949	0.0830791	0.111293	52.572	-0.323095	-1.54981	28.7067	-0.169606	-0.391126	57.7897	CAAACGGAAGAGAGTGGCAGCATTTCGAAAGAACCTAATCGAAATGTCTGAACTGGAAATAAAGCATGCC
Mre11a			NM_018736	meiotic recombination 11 homolog A (S. cerevisiae)	-0.584884	-2.99529	0.195841	-0.97491	-0.305164	37.3998	-0.353394	-1.75372	20.2901	NA	NA	NA	GGGGCTGCTCTGCCATATCGAGAACATTAACTTCCTGACAGAACTGTGTTTTCTGCTTGTAAGAACTTGG
Rpl27			NM_011289	ribosomal protein L27	-1.03275	-2.9872	0.253346	NA	NA	NA	-0.570686	-1.69134	22.6266	NA	NA	NA	TACTCTGTGGATATCCCCTTGGACAAGACTGTTGTCAACAAGGATGTGTTCAGGGACCCAGCTTTGAAGC
Txnrd2			NM_013711	thioredoxin reductase 2	-0.476885	-2.98386	0.27739	-1.31403	-0.444467	20.7995	-0.19016	-0.851005	69.159	NA	NA	NA	CTGCCTCTCAGAGATCTGAGAAGATGTGGATGGAACATCGTGTGTCCTGCAGGGATGACTATACCCCTAC
bsid(950474)	Paf53		NM_022811	RNA polymerase I associated factor	-0.434559	-2.98131	0.295858	-2.56024	-0.898545	0	-0.141486	-0.647056	79.8503	-0.294281	-0.615986	35.3347	TCTGAGCCTCTCTGGGACTCCATCATGCTCCACCACACCCCCGAGGCCTTACTTTAGGGTGGTTATCATG
Rps26			NM_013765	ribosomal protein S26	-1.00409	-2.97863	0.315316	NA	NA	NA	-0.174926	-0.146764	90.5571	NA	NA	NA	ATAAGGCCATCAAGAAGTTTGTCATTCGGAACATTGTAGAAGCCGCTGCTGTCAGGGACATATCTGAAGC
Eif2b3			XM_131572	eukaryotic translation initiation factor 2B, subunit 3	-0.524355	-2.97819	0.318524	-3.45498	-1.2744	0	-0.211394	-1.08371	55.1321	-0.385857	-0.844662	17.4956	TGAACCCTGAACAAGCCCGACCCCTTCCTTTGGGCCTCAAACTACAGATGCTGCCTGGCCCACCTGTTTT
Dld			NM_007861	Mus musculus dihydrolipoamide dehydrogenase (Dld), mRNA.	-0.377391	-2.97382	0.350418	-1.06089	-0.345602	32.3484	-0.171839	-0.912517	65.5709	-0.157815	-0.402501	56.6302	GAGAAATGGTGAACGAGGCGGCCCTGGCATTGGAATATGGTGCTTCCTGTGAAGATATAGCTCGAGTCTG
Fgd2			NM_013710	FYVE, RhoGEF and PH domain containing 2	-0.61492	-2.9721	0.363124	-2.41777	-0.882533	0	-0.0672623	0.277417	79.9306	NA	NA	NA	AATTCATCCTGACTCTGTATCCAGCAGACACAGGCCCTTTCCTTCAGGAAGATACCACCAAGTGTCCCAG
Rpl15			NM_025586	ribosomal protein L15	-1.36597	-2.96787	0.394378	NA	NA	NA	-0.663076	-1.6696	23.4899	-1.82835	-1.82179	1.17873	TAAACGCCCAGTTCCTAAGGGTGCAACTTACGGCAAGCCTGTCCACCATGGTGTTAACCAGCTGAAATTT
Sept6	Sept6		NM_019942	Mus musculus septin 6 (Sept6), mRNA.	-0.511166	-2.96662	0.40361	0.169686	0.14244	49.5351	-0.408625	-2.25816	7.68039	0.332522	0.527332	52.898	GAGAAGAAGAAGCTGGAGGATAAGAAGAAATGTCTGGATGAGGAAATGAACGCCTTCAAGCAGAGAAAGG
Mrpl16			NM_025606	mitochondrial ribosomal protein L16	-0.348729	-2.96553	0.411751	-2.24821	-0.686763	2.80724	-0.141027	-0.752594	74.5917	-0.738017	-0.826593	18.6433	TACGGAAATTCCTGAGCCCATATGACTTGACGCAGAAAGGGCGATACTGGGGCAAATTCTACATGCCCAA
Gapdh			mSQ025244	similar to glyceraldehyde-3-phosphate dehydrogenase	-1.2068	-2.96399	0.423254	-0.235659	-0.0119021	59.4776	-0.871694	-2.44059	5.29195	0.0792616	0.00952653	85.1221	AACTCCCACTCTTCCACCTTCGATGCCGGGGCTGGCATTGCTCTCAATGACAACTTTGTCAAGCTCATTT
Igbp1			NM_008784	immunoglobulin (CD79A) binding protein 1	-0.826327	-2.9621	0.437368	0.32569	0.212439	41.6139	-0.616705	-2.30073	7.03903	0.291393	0.387612	67.0336	GATGAGGAGAGTGAGGAGAAAGCCTTGCACAGGATGCGAGAGTGGGACGACTGGAAGGACACCCATCCCA
Hnrnpc	Hnrpc		NM_016884	heterogeneous nuclear ribonucleoprotein C	-0.479837	-2.96159	0.441229	-1.86352	-0.55326	10.7255	-0.0972281	-0.408758	88.376	-1.08226	-0.96977	10.8052	ATTAATTCATGATTGCCCTGCGCCTAGTTACAGTTCCACTTCCTTTGATGCTCCGTAGTACTTTCGTTAA
Pcdhgc3			NM_033595	protocadherin gamma subfamily B, 5	-0.526911	-2.9556	0.486394	-0.474564	-0.106526	57.5117	-0.263404	-1.24753	45.0852	0.154029	0.151001	83.48	TTACAGTAGTGTAGAAGATCCCCCTCCCCCGCTGGTGTAGAATAGCCAATAGTATAGTGTGGTGTGCTTT
Gstp1			NM_013541	Mus musculus glutathione S-transferase, pi 1 (Gstp1), mRNA.	-0.319568	-2.955	0.490945	-0.30793	-0.0401056	59.5973	-0.0844779	-0.176747	90.7058	2.0039	1.11822	8.31327	AGAACCAGGGAGGCAAAGCTTTCATCGTGGGTGACCAGATCTCCTTTGCCGATTACAACTTGCTGGACCT
Mvd			NM_138656	mevalonate (diphospho) decarboxylase	-0.463216	-2.95389	0.499369	-0.143973	0.0194711	58.646	-0.232804	-1.19679	48.1576	-0.106479	-0.202685	75.1259	TAGGCGATCACGGGAACCCCTCTCAAGTGCCTCCGGTTCCCCGCTGGTTTCTGAAGGGCTAGCTGACCCA
Nek3			NM_011848	Mus musculus NIMA (never in mitosis gene a)-related expressed kinase 3 (Nek3), mRNA.	-0.522918	-2.94975	0.530955	-0.0501618	0.0609212	56.5124	-0.144648	-0.319897	90.0093	0.20083	0.26779	77.1333	AGAGAGCCCCCTGAGGCCTTGCTGTCAATGCTGAAGGACGCTGATCTCAGTCAGGCATTTCAGACATACA
Rpl9			NM_011292	ribosomal protein L9	-0.802051	-2.94587	0.560753	-0.0724851	0.0498315	57.19	-0.423812	-1.66492	23.679	0.146472	0.14868	83.563	ATCAACGTCGTCATCCAGGAGAATGGCTCTTTGGTTGAAATCCGAAATTTCTTGGGTGAAAAATACATCC
Rpl27a			NM_011975	ribosomal protein L27a	-0.939684	-2.94062	0.601443	0.12132	0.127989	50.9927	-0.66877	-2.09227	10.7488	0.389379	0.613087	44.0685	CGACTGGTCACTTAATACTGGACAGATTAGCATGGAAAACTTAAGGGGAGGAGGAGGTAGTAGGTTCCAT
Ap4m1		1	NM_021392	adaptor-related protein complex AP-4, mu 1	-0.476723	-2.94048	0.602542	0.78715	0.385404	21.1427	-0.424545	-2.48038	4.88557	0.297973	0.396368	66.1959	AGTGGGTTCGACATCTAAGCCACAGCAACGCCTACGTAATTCGGATTTGAAGCTCCCCAAGCAAGGATAT
Scaper	Zfp291		mSQ028890	zinc finger protein 291	-0.505594	-2.93408	0.652582	0.656256	0.338215	26.3898	-0.365167	-2.11675	10.2354	0.772113	1.37385	2.2892	TTCCTTCGCTTATCACCGCGTGTCACAACAACCATCAGAACAAGCTCATTCTGGAGCAAGAGATGAGCTG
Lap3			NM_024434	leucine aminopeptidase 3	-0.387312	-2.93247	0.665254	-1.92423	-0.682519	2.98886	-0.359563	-2.68205	3.33268	-0.246856	-0.675505	30.0304	TTTCAAGCCATATTTACTATTTTTACAAGATAGGGGAAATCTTAAGTCCATAAAAATGGACAAAGGCCAG
Pon3			NM_173006	paraoxonase 3	-0.514797	-2.93238	0.665947	0.208933	0.164586	47.1625	-0.19692	-0.948126	63.4426	NA	NA	NA	GCTCATAGGTACTATATTTCACAAAGCTCTGTACTGTGACCTCTAGATCTTTCTAAAACGTCTTTATATT
Klhdc4			NM_145605	kelch domain containing 4	-0.497281	-2.92787	0.701713	NA	NA	NA	-0.324479	-1.86585	16.5811	NA	NA	NA	CCACGCGGAACGAGGGTTAGAGTGGGATGTGAATTTGAGGCCCACAGGCTGTGTGCTTCTGTCATAATAA
Mthfd1l	Fthfsdc1		NM_172308	formyltetrahydrofolate synthetase domain containing 1	-0.65959	-2.92672	0.710847	-1.80715	-0.631529	5.51543	-0.295216	-0.914605	65.4471	-0.428424	-0.833638	18.1903	CTGAGACAGGCCAAAGACCGCTTCCTCATACAAGATTAACTCTGTTTCCAGCCAAGTGGTGTTCAACAGA
Acadl			NM_007381	acetyl-Coenzyme A dehydrogenase, long-chain	-0.581848	-2.92297	0.740821	NA	NA	NA	-0.419914	-2.08553	10.8941	NA	NA	NA	TGGAATCCTATTACATGCAGCTAATGCGGATTCTAATCTACTTGAGATAAAGTGTAACCTGGAAAAGGGG
Pdlim2			NM_145978	PDZ and LIM domain 2	-0.419031	-2.92048	0.760832	-0.126877	0.0291067	58.25	-0.284406	-1.84572	17.2032	0.505955	0.856007	22.5657	ATGCTGCAGGAGAACCGCCAGGGACGGGCCGCCCCAAGGCAGTCCAGCTCTTTTCGACTCTTACAGGAAG
Msto1			NM_144898	cDNA sequence BC008103	-0.454353	-2.91948	0.768892	-1.88033	-0.677388	3.21412	-0.218154	-1.24189	45.4236	-0.458399	-1.12696	5.23599	AACATCTATCGTCTCTTAAACACGGCATTTGGTCTGGTGCACCTGACTGGATACAGCTCCTTCGTCTGTC
Gba			NM_008094	glucosidase, beta, acid	-0.556202	-2.91842	0.777438	0.0948847	0.114453	52.2824	-0.222902	-0.974717	61.8339	0.315828	0.426962	63.197	CTGAAGGAGGGCCCAACTGGGTCCGCAACTTTGTCGATAGCCCCATTATTGTCGACATCCCCAAAGACGC
Nfkbil1			NM_010909	nuclear factor of kappa light polypeptide gene enhancer in B-cells inhibitor-like 1	-0.447641	-2.91511	0.804275	-0.855932	-0.259889	42.9998	-0.154977	-0.329438	89.8777	0.275524	0.430061	62.8878	ACTTGAGAGTCCAACAGGTCCGGTGGCATCCTGACCGCTTCCTGCAGCGATTCCGAAGCCAGATTGAGAC
bsid(979692)	1300006C19Rik		XM_358385	RIKEN cDNA 1300006C19 gene	-0.451628	-2.90996	0.846292	-0.869859	-0.267419	42.0833	-0.35427	-2.27626	7.40093	0.0231025	-0.0816601	82.4948	GCTCCGGGAGAGAGAATGTTACTGCAGATCCCTTTTCCACGGTGTAGATACTCTGATTTATAGAATTCAT
Mrps9			NM_023514	mitochondrial ribosomal protein S9	-0.371297	-2.90641	0.875434	0.404397	0.234004	38.996	-0.195158	-1.10814	53.6194	-0.0940336	-0.300579	66.71	AAGAAAGTTCACCTGGAAGAAGCGCTGAAACTTTTCCCAGGAGAGCGAGGAGCACAGCGTCTTCGTGCCT
bsid(852631)	Pgd		NM_025801	phosphogluconate dehydrogenase	-0.658357	-2.90606	0.87831	-1.63557	-0.545877	11.3047	-0.344542	-1.31346	41.1928	-0.260027	-0.545556	42.0766	AGCCGAGGAGTCGGTGGGCAGAGGCTCTCCTGTCGGGTATTTCTTACTGGCACAGTAGGTACCTGGATGT
Ctsd			NM_009983	cathepsin D	-0.421569	-2.90241	0.908496	-1.02178	-0.229099	46.6356	-0.264663	-1.60616	26.1557	-0.946504	-0.645639	32.6416	TGTCTGAAGGAGGCCAAGGCCCACCCAGTACACGAGGCTGCCTTCAAAGGCCCCTACTGGTTTAATAGCT
Gbp4			mSQ003495	guanylate nucleotide binding protein 4	-0.472114	-2.89817	0.943828	-0.20822	-0.00311956	59.3176	-0.250102	-1.36183	38.4293	0.157337	0.104729	84.7917	CCAGGAGCTGGTAAACTATTTGGTGTGGGGCTGAAATTCCTCGGCTCACTAAGTAGTTAGTCTAAAGAGT
Vkorc1			NM_178600	vitamin K epoxide reductase complex, subunit 1	-0.691651	-2.8929	0.988099	-0.154231	0.0177904	58.7086	-0.22571	-0.770917	73.6139	0.495789	0.763592	29.9094	TGTCCGTCGCTGGTTCCGTGTACCTGGCCTGGATCCTGTTCTTTGTGTTATATGATTTCTGCATTGTGTG
Qdpr			NM_024236	quininoid dihydropteridine reductase	-0.335688	-2.88641	1.04304	-1.30568	-0.430215	22.3464	-0.184409	-1.16835	49.9005	-0.644064	-1.26749	2.4163	GATGGTGAGGTATGTTTATGGGAAATGAGCAGAGGCCTGTAGGTAGCACCTGAGGGTCCAGGGAGGTATA
Pgk1			NM_008828	phosphoglycerate kinase 1	-0.703517	-2.88437	1.06047	-0.550727	-0.131209	55.9645	-0.458881	-1.79083	18.9953	0.091203	0.0371958	85.3588	CTAAGTCAACCTAGTGTTTTCCACATCTCCATTTGGTGTTAGCGCAAGATTCAGCTAGTGGCTGAGATGT
Rnf114	Zfp313		NM_030743	zinc finger protein 313	-0.490165	-2.88402	1.06349	0.0918162	0.10675	52.9803	-0.267739	-1.13419	52.0074	0.153791	0.125609	84.2899	ACCTCTTGTCCTTCATCACACTCGCTGTTTCTAATATGACTTTCCAGAAAGTGTGGTTATGTTCTGTCTT
Psmb1			NM_011185	proteasome (prosome, macropain) subunit, beta type 1	-0.616653	-2.88298	1.07239	-0.637509	-0.153911	54.2137	-0.326355	-1.09759	54.2723	0.158968	0.108558	84.7109	TGGCTTCAAAAATATGCAGAATGTAGAGCACGTCCCCCTGACGCTGGACAGAGCCATGAGGCTGGTGAAA
Gtf2f2			NM_026816	general transcription factor IIF, polypeptide 2	-0.402427	-2.88173	1.08312	-1.24503	-0.386896	27.3167	-0.122875	-0.434724	87.7283	-0.225214	-0.443493	52.4241	CCTGCCTGCCTGCCTTGACAGGACAAAGACACCTGGGTCTACCACTCCTCTCAGTAAACTGTTAAAGCTG
Canx			NM_007597	calnexin	-0.416012	-2.87376	1.15199	-1.69175	-0.594229	7.79003	-0.321899	-2.11526	10.266	-0.223744	-0.601522	36.6818	TTTTCTATGCTGGACTCCTTGTTGTAAAATGTCCATGCCAGTAGTACTCTTCTATTGTCCACTTTTCAGA
Serhl			NM_023475	serine hydrolase-like	-0.446322	-2.87262	1.16191	0.795942	0.398453	19.7783	-0.315439	-1.79682	18.7926	0.426692	0.745684	31.4659	TAATGATCAAAGCGCTGCAGGGGTACTACGATGTGAGGCGGGCGAATGATGCAGACAAGGCGCCTATGCA
Spata7			NM_178914	spermatogenesis associated 7	-0.361414	-2.86243	1.25142	0.710386	0.347857	25.2814	-0.247677	-1.73253	21.061	0.294778	0.421551	63.7346	CCCCAGCATCAATGGTGGCAGTAATCATGGTAAGGAATTATCGACTCTACGAATCATGGGAATGAGCATT
Ppid			NM_026352	peptidylprolyl isomerase D (cyclophilin D)	-0.533404	-2.86219	1.25355	-3.53158	-1.31301	0	-0.301274	-1.38028	37.3996	-1.08961	-2.24515	2.25325	GTCTACATGCTCCCTGTTGTGTTTCCCTTGATCTCTGTCATTGTTTACATAGCAGTGCTGACACAGGTTC
Sdf2			NM_009143	stromal cell derived factor 2	-0.544171	-2.85266	1.33867	0.753249	0.378741	21.8548	-0.284642	-1.48866	31.6706	0.198136	0.240958	78.9482	CAAATGCGGGCAGCCCATCCGTCTGACACACATCAACACAGGTCGAAACCTGCACAGCCACCATTTCACT
Pcdhgc3			NM_033595	protocadherin gamma subfamily A, 8	-0.505275	-2.8515	1.34907	-0.479859	-0.107283	57.47	-0.199006	-0.785346	72.8323	NA	NA	NA	TTACAGTAGTGTAGAAGATCCCCCTCCCCCGCTGGTGTAGAATAGCCAATAGTATAGTGTGGTGTGCTTT
Snrpa			NM_015782	small nuclear ribonucleoprotein polypeptide A	-0.335856	-2.84659	1.39348	-0.8285	-0.243001	45.0195	-0.116826	-0.421153	88.0764	-0.108564	-0.265952	69.8783	CGAGTTTGCCCGCCGTGATTAGCTCGCGGAAGGGAGAAGCCGTTGCCGGGGAAGATAGTTGTGTGTCTGT
Plcg2			NM_172285	phospholipase C, gamma 2	-0.664515	-2.83283	1.51988	NA	NA	NA	-0.686202	-2.58421	3.98919	NA	NA	NA	TATTTTTCCACCTTGGACAACTTTCTTAACTTATACTACCCCTGATAGAGGATCCCCCCAACTGTGTGCC
Coq6			NM_172582	coenzyme Q6 homolog (yeast)	-0.350767	-2.83277	1.52045	-0.522415	-0.129771	56.0651	-0.211453	-1.31808	40.9253	0.114577	0.100006	84.8842	ATTATGGCCTTTGCGAGCAAATGAGTGCTTCTCTTCTGGAGACCGTGATGACAAAGAACACCTAGCCCTG
Vdac2			NM_011695	voltage-dependent anion channel 2	-0.576105	-2.83092	1.53763	-1.21648	-0.387226	27.2775	-0.305227	-1.32587	40.4756	-0.11309	-0.296023	67.1368	CTTCCTTCCCCCAGAAGGTGATCACATCAAAGGATGATGAAGCAAGAGCTGTATTTTAAATATTTAGACA
Zfp296			NM_022409	zinc finger protein 296	-0.438456	-2.82981	1.54795	0.384125	0.223658	40.2576	-0.264735	-1.52042	30.1059	NA	NA	NA	TTCCCACACTGGTGAGCGACCCTACTCCTGTGACCAGTGTTCCTATGCCTGCGCTCAGAGCAGCAAGCTC
Olfml2b			NM_177068	olfactomedin-like 2B	-0.434835	-2.82921	1.55355	0.720086	0.361683	23.7226	-0.290136	-1.44453	33.9334	-0.0987902	-0.275433	69.0289	TTATATTTTTGTGCAAATGAACTTCTCCTTCTGACCAGTAACTACCTTCTTTCGTGCTCTGAACCTCTGA
Nudt21	Cpsf5		NM_026623	cleavage and polyadenylation specific factor 5	-0.453675	-2.82671	1.57697	-0.394839	-0.0709495	59.028	-0.237848	-1.37932	37.4529	0.529196	0.459656	59.8972	TAAAAATTACAAGCTGGTAGCTGCACCATTGTTTGAGCTGTATGACAATGCACCGGGGTATGGACCCATC
bsid(902313)	Smad1		mSQ035933	Smad family member 1	-0.707665	-2.82646	1.57929	-0.145683	0.0210822	58.5842	-0.407723	-1.38165	37.3234	0.128776	0.115006	84.5635	GTCCCGTGCTCCGATCCGCTCCCGGCCGCCGTCCCCGCGCTCTGCTTAGCTCCGGGCCGCCGTCCCCGCG
Plp2			NM_019755	proteolipid protein 2	-0.623358	-2.82629	1.58094	0.286895	0.184703	44.888	-0.266612	-1.06522	56.2758	0.0643339	-0.00476609	84.8945	GTTCTGCTTGAACCATATCCCCACATAAGCTACAAAATGAGTGACCCACTACAAATAACCTTTTTCTCTG
Mipep			NM_027436	mitochondrial intermediate peptidase	-0.445003	-2.8232	1.60996	-2.01386	-0.697916	2.34984	-0.138402	-0.497423	85.8559	-0.262847	-0.619228	35.0357	CGCTCCAGCTTCAGCGATCACTGAGGAGACATTTTCTGACAAGCCTTAAATTGACAGGACTCAGAATAAA
bsid(911881)	Rpl23		NM_022891	ribosomal protein L23	-0.959286	-2.82301	1.61173	-0.685828	-0.169007	52.8909	-0.533157	-1.64462	24.5136	-0.33036	-0.470004	49.7009	AATTGCATCCAACGCAGGCAGCATTGCATGATTCTCCAGTGTATTTGTAAAATATATTCATTAAAGTCTC
Ddx28			NM_028038	DEAD (Asp-Glu-Ala-Asp) box polypeptide 28	-0.415634	-2.81847	1.65466	-1.0199	-0.324028	35.0382	-0.191694	-0.961038	62.6633	NA	NA	NA	TCGCCTCCCGAGGCCTAGACAGTGTCCACGTGGAAGTGGTTATCAATTACGATTTCCCCCCTACCCTGCA
Klrb1d			NM_030599	killer cell lectin-like receptor subfamily B member 1D	-0.367212	-2.81688	1.66983	0.17819	0.133501	50.446	-0.190568	-1.10538	53.7902	0.982418	0.906628	19.0555	ACCTGATTTTAATCCTTGAGTCTGTGTGACCTTTGCTGGTCTCTGTCCCTGAGGTCACCTGCAGACAGCC
bsid(870638)	Soat1		NM_009230	sterol O-acyltransferase 1	-0.406768	-2.80944	1.74102	-0.231844	-0.0122411	59.4826	-0.342606	-2.04852	11.7214	0.437437	0.648728	40.5194	GCTCCAGAAGCTGGCTTCTGAAACATCTGCTCAGTCATTATACTTTATATTTTTAGATGAAATAAATGAC
bsid(902313)	Smad1		mSQ035933	Smad family member 1	-0.622794	-2.80518	1.78217	-0.0139674	0.072866	55.7013	-0.337674	-1.26398	44.1024	0.279169	0.389531	66.8508	GTCCCGTGCTCCGATCCGCTCCCGGCCGCCGTCCCCGCGCTCTGCTTAGCTCCGGGCCGCCGTCCCCGCG
Csnk2a2			NM_009974	casein kinase II, alpha 2, polypeptide	-0.39249	-2.80004	1.83212	-0.728042	-0.178048	52.0439	-0.167303	-0.84361	69.5815	-0.132347	-0.231146	72.8621	AGGACTAGCTGACCACAGACTCCACAGACGGGATGGGAGCAGTGTATGGCATGATGGGCAGTTACATATT
Ran		3	NM_009391	RAN, member RAS oncogene family	-0.327702	-2.79464	1.88508	-2.24482	-0.815461	0	-0.196704	-1.06824	56.0895	-0.662984	-1.411	1.04652	CCCATCGCAATATCCAGTGGGGAAATCTTGTTTGTTACTGTCATTCCCATTCTTTTCGTTTAGAATCAGA
Slc25a3			NM_133668	solute carrier family 25 (mitochondrial carrier, phosphate carrier), member 3	-1.07419	-2.79305	1.90079	-1.84521	-0.588051	8.20295	-0.758244	-1.88452	16.0211	-0.942824	-0.90757	13.8613	CGCCTGCTTTGAACGTACTGTTGAAGCTTTGTACAAATTTGTGGTTCCTAAGCCCCGAAGTGAATGTACA
Lamp2			M32017	Mouse lysosomal membrane glycoprotein type B (lgp-B) mRNA, 3' end.	-0.447297	-2.78883	1.94254	0.726742	0.365367	23.314	-0.297198	-2.03545	12.0257	0.143857	0.142535	83.774	ATTGGTCTCAAGCGCCATCATACTGGATATGAGCAATTTTAGTAACTGCAATCTGATTGATTATATTACA
bsid(954075)	Pon3		NM_008897::NM_173006	Mus musculus paraoxonase 3 (Pon3), mRNA.	-0.470282	-2.78835	1.94734	0.15562	0.142024	49.5781	-0.143175	-0.403182	88.5051	0.0935269	0.045891	85.3772	GGACTCCACTGTGGAGATATTTAAGTTTGAAGAACAACAACGCTCTCTCATCCACCTGAAAACTCTAAAA
Napsa			NM_008437	Mus musculus napsin A aspartic peptidase (Napsa), mRNA.	-0.407541	-2.7855	1.97576	-0.459686	-0.100701	57.8194	-0.167672	-0.615617	81.2705	0.416381	0.616658	43.7087	ATTGGTTTGGGAACGCCTCCTCAGAATTTCACCGTTGTCTTTGACACGGGTTCTTCCAACTTGTGGGTTC
Ccdc22			NM_138603	DNA segment, Chr X, Immunex 40, expressed	-0.360789	-2.7854	1.97674	0.110847	0.120582	51.7081	-0.349159	-2.6594	3.47028	-0.00801057	-0.136379	79.6631	CTGCTTATATGTTCCCATATCTGATCAGGGTGATTGTCCAGCTGACCACAGTTTATTGGATGGGCACTGG
1700113I22Rik			NM_026865	RIKEN cDNA 1700113I22 gene	-0.798413	-2.78302	2.0006	-1.40024	-0.464111	18.7462	-0.0545089	0.31298	78.5034	0.354966	0.548581	50.6879	AAAAACTGGGATGGTGCCTTCTTCAACTACTTGGTTTGCATCAAGATCCACAGAGACCTCTGAACTCTTC
Acsl4		1	NM_019477	acyl-CoA synthetase long-chain family member 4	-0.459002	-2.78007	2.03015	0.593478	0.320394	28.4785	-0.396455	-2.57085	4.09222	NA	NA	NA	ACCATTATCTCAAAGACATTGAGCGAATGTATGGGGGCAAATAAAATGCGGCTCTCTGATTTCCATTTGC
Akr7a5			NM_025337	Mus musculus aldo-keto reductase family 7, member A5 (aflatoxin aldehyde reductase) (Akr7a5), mRNA.	-0.340596	-2.77505	2.08089	-0.323409	-0.0467768	59.5361	-0.215649	-1.73781	20.8666	-0.0800197	-0.231335	72.8466	GTGGAGGCCGAGCTCCTCCCCTGCCTCAGACACTTCGGACTGAGGTTCTACGCCTACAACCCTTTGGCTG
Yipf3			NM_145353	Mus musculus DNA segment, Chr 17, Wayne State University 94, expressed (D17Wsu94e), mRNA.	-0.331076	-2.77489	2.08251	0.227926	0.170327	46.5238	-0.155482	-0.830176	70.3437	0.443887	0.749191	31.158	TCAGCTTGTATGCCAACATTGACATCCTCAGACCCTACTTTGATGTGGAGCCTGCCCAGGTCCGAAGCAG
Cdkn2a			NM_009877	cyclin-dependent kinase inhibitor 2A	-1.01342	-2.77287	2.1031	-0.126668	0.0292539	58.2434	-0.479961	-0.80987	71.4818	-0.0338618	-0.194702	75.7292	CTTCACTTCTAGCGATGCTAGCGTGTCTAGCATGTGGCTTTAAAAAATACATAATAATGCTTTTTTTGCA
Ppa1	Pyp		NM_026438	pyrophosphatase	-0.723902	-2.77192	2.11269	-4.67876	-1.57403	0	-0.101512	-0.222285	90.7423	-1.40718	-1.54854	0.674333	CTGTAGCTCACCGAATGAAGTAGACTCTGCTGTGACTGGTCCACTAGTTCAGAACTGGTTCAGAAGGTTA
Mak16			NM_026453	RIKEN cDNA 2600016B03 gene	-0.385819	-2.77106	2.12149	-1.94327	-0.686475	2.81945	-0.129975	-0.353495	89.4988	-0.507672	-1.11076	5.68015	ATCTACAACTTCCCCATCCATGCCTTCGACAAGGCCCTAGAGAAACAGGAAGCAGAAAGTGACTCTGAAG
Ddx19a	Ddx19		NM_007916	DEAD (Asp-Glu-Ala-Asp) box polypeptide 19	-0.347809	-2.76994	2.1329	-0.115144	0.0341653	58.017	-0.218743	-1.1527	50.8644	-0.071088	-0.307945	66.0141	AATGGAAGTCAGCAAATCTCAGACTCGAGGGTCATAGACAATCCCATTGAAGATGGAGGTGTCTTTCCTC
Acads			NM_007383	acyl-Coenzyme A dehydrogenase, short chain	-0.323111	-2.7692	2.14054	-0.254453	-0.0217587	59.5883	-0.13832	-0.786095	72.7915	-0.181279	-0.494265	47.2226	CCTGGAGAGTGCCCGCCTGCTGACCTGGCGTGCTGCCATGTTGAAAGACAACAAGAAACCTTTCACCAAG
Mak16			NM_026453	RIKEN cDNA 2600016B03 gene	-0.378065	-2.76854	2.14721	-2.21022	-0.779358	0	-0.168656	-0.690691	77.7604	-0.616378	-1.26832	2.40453	GGCACTGGCTGTAAATATTTCTAAATTACTTAGAAATGTCAGGATTTCAATTTTTTTCTCACTCAACTTT
Adck4			NM_133770	aarF domain containing kinase 4	-0.422089	-2.76666	2.16654	-0.0721023	0.0504844	57.1522	-0.169025	-0.609667	81.5306	0.233274	0.303743	74.4154	TTGGATCTTTGGGCCCCTGGAGTTAGCTCCCTGATCCTAAGTGAGCAACCTTGAATTCTGAGGCTAGGAG
Rpl18			NM_009077	ribosomal protein L18	-0.866491	-2.76642	2.16899	-0.221474	-0.00859449	59.4241	-0.492035	-1.80609	18.4825	NA	NA	NA	GGCGAGATGTGTTCCCACATTTTGGGAAGGTCCCAGGTACTCCATACAGCCAAACCAAACCCTATGTCCG
Rps7			NM_011300	ribosomal protein S7	-1.02375	-2.76446	2.1892	-0.123098	0.0299664	58.2116	-0.583841	-1.66571	23.647	0.366859	0.485384	57.2537	GAAATTGTGGGTAAGAGGATCCGTGTGAAACTGGATGGCAGCCGGCTCATAAAAGTTCACTTAGACAAAG
2700060E02Rik			NM_026528	RIKEN cDNA 2700060E02 gene	-0.672091	-2.76402	2.19369	-0.2268	-0.0102363	59.4517	-0.314791	-0.969054	62.1777	0.108024	0.0630946	85.3342	GGAGAACCCCAGGAGATTGACTATGTTCTAGAGATTTACCACCGCTGCTTTTTCTTTAATAAAGTTGGAG
Lmbrd1			NM_026719	RIKEN cDNA 0910001K20 gene	-0.408196	-2.76142	2.22058	0.609815	0.312758	29.3869	-0.289155	-1.46216	33.0173	0.8878	1.4004	1.97332	GTAATGTACTGATTTAGAAACAATCTACAGACACAGCACACTTGATGTTGGCCACTTTGTCATCTTTCTG
Prcp			NM_028243	RIKEN cDNA 2510048K03 gene	-0.601935	-2.76059	2.22915	0.971462	0.451802	14.6459	-0.57371	-2.53814	4.35919	0.609897	1.00305	13.3918	GGAATCTGGCCTTGTCCTGCTCTCTTTGTTTCCAAGGCCAATTTTATGGTGGTCTGGCTACATTCTGCCA
Glrx3	Txnl2		NM_023140	thioredoxin-like 2	-0.496908	-2.75644	2.27229	-1.579	-0.552688	10.7698	-0.133637	-0.572507	83.0886	-0.482058	-1.0392	7.98578	CAAGAAGTAACTAATTACCTTGGAACAGTTGATGATTTGGTCCTGAGAAGTGGACTAACAGTAGAGATAC
Lrrc42			NM_029985	RIKEN cDNA A930011F22 gene	-0.451909	-2.7556	2.281	-1.30722	-0.42	23.4833	-0.158541	-0.791657	72.4874	-0.484894	-0.893593	14.6207	GATAACAGACGCTGGAATTGGATACCTGTTTTCATTTAGAAAATTAAATTGCTTGGATATCTCTGGAACA
Cr1l	Crry	3	NM_013499	complement receptor related protein	-0.431252	-2.75105	2.32873	-0.729394	-0.204982	49.3088	-0.146585	-0.581567	82.7196	-0.118841	-0.352097	61.7174	AGAGGAAGTTTTATTCCGGAACCCAGCGCCATTTCTGGGTGGGACTGCTTTCTACACCATTTGCCGTAAA
Papd1			NM_026157	PAP associated domain containing 1	-0.343222	-2.75018	2.33789	-0.400768	-0.0774433	58.8175	-0.248941	-2.10493	10.4807	-0.156471	-0.407345	56.135	CTAGTTGAAAATCATTTCAAAACCCTTTCAGTTATCTTCATCTATAGGTGACGAATGCAATAAAGCTCCA
Atxn10	Sca10		NM_016843	spinocerebellar ataxia 10 homolog (human)	-0.501336	-2.74919	2.34832	-1.60044	-0.427975	22.5938	-0.245123	-1.11504	53.1919	-0.533401	-0.400004	56.8851	AATGGGCTTTGAAATTGAAAAGAGTGGGGATAAACTGATTCTGAAGTCTAATAATGACATCCCCCCGCCT
BC027231			NM_145972	Mus musculus cDNA sequence BC027231 (BC027231), mRNA.	-0.554823	-2.74493	2.39326	-1.43977	-0.477709	17.3816	-0.194624	-0.468778	86.7641	-0.598277	-1.16555	4.28478	ACTCAAGAGCCAGACCTTGGATGCGGAAGTAGATGTGTTATGCTCAGTTCTCTACAGCAATCACAACAGG
Got2			NM_010325	Mus musculus glutamate oxaloacetate transaminase 2, mitochondrial (Got2), mRNA.	-0.603485	-2.74067	2.43863	-0.997663	-0.311726	36.5784	-0.189131	-0.481077	86.3847	-0.318685	-0.703962	27.646	TTGAAATGGGACCTCCAGATCCCATCCTGGGCGTTACCGAAGCCTTCAAGAGAGATACCAACAGCAAGAA
Ltv1			NM_181470	RIKEN cDNA 2610020N02 gene	-0.290903	-2.73768	2.47062	-3.01232	-1.10997	0	-0.102181	-0.524689	84.9134	-0.755999	-1.54532	0.675828	TGCTCTGTAATTAACCAGGATCTGAAGAGGGGTGAGCTTGCCCCTGCCATTTTTATATGCAAATAGCTGA
Ptrh1			NM_178595	RIKEN cDNA 2210013M04 gene	-0.73725	-2.73523	2.49687	-0.665412	-0.180881	51.7707	-0.444225	-1.76566	19.8658	0.0303525	-0.0671537	83.0937	TGACTGCGGAGGAGATCTATCTGGTCCATGATGAACTGGACAAGCCGTTGGGAAAGCTGGCTCTGAAGCT
Ttll12		1	NM_183017	cDNA sequence BC055368	-0.404325	-2.73462	2.50346	-0.870634	-0.263413	42.5719	-0.270681	-1.47478	32.3713	NA	NA	NA	TTCCAGATGTCCTACTGTTCGGGTGGGACACTGTGGTGGCTGTTGTACTTGTGAAGGTAAAAGTGACCTT
Guca1a			NM_008189	guanylate cyclase activator 1a (retina)	-0.666179	-2.73024	2.55071	-0.149759	0.0198677	58.631	-0.280183	-0.978944	61.5769	0.658096	0.631786	42.1944	GAGCGACTCATCCATGAGTGCCGAGGAATTCACAGATACCGTGTTTGCCAAGATCGACATCAACGGGGAT
bsid(946439)	4930435H24Rik		XM_485603	RIKEN cDNA 4930435H24 gene	-0.429076	-2.72952	2.55851	-0.811686	-0.235235	45.9281	-0.256558	-1.49426	31.3908	0.173184	0.178606	82.3586	TCCTTGTCTTCTCAGATACCGGCAAAGTCTCTAATAAATTGCCAGAATTTCACAAGTGAATCATGAGGAG
Rpl27a			NM_011975	ribosomal protein L27a	-0.914168	-2.72869	2.56751	0.0944318	0.1171	52.0363	-0.628314	-1.90176	15.5174	2.02494	1.24954	4.45384	AGATTAGCATGGAAAACTTAAGGGGAGGAGGAGGTAGTAGGTTCCATCCAGCTTCGCTTTGTTGGTGGCA
Adh5			NM_007410	alcohol dehydrogenase 5 (class III), chi polypeptide	-0.626815	-2.72778	2.57744	-1.56744	-0.513368	14.0396	-0.372379	-1.64601	24.4556	-0.598992	-1.03767	8.04167	ATAATCGAGACTGTAATCATGAACTAGGCAAATTCCACATAAACAATTGCTGCTCATTGTGCAACATTTT
Hnrpdl		2	NM_016690	heterogeneous nuclear ribonucleoprotein D-like	-0.497544	-2.72754	2.58005	-1.94075	-0.655754	4.23374	-0.387254	-2.16433	9.2988	-0.787499	-1.61515	0.699578	GATGACTCAATGTGGATTTGTGTTCATACAAATTTTTATTTGTGTGGTTTCATGTTAAACCTCAAATAAA
Arl15	Arfrp2		NM_172595	ADP-ribosylation factor related protein 2	-0.84832	-2.7263	2.59355	-0.12417	0.0285109	58.2763	-0.402116	-1.08354	55.1422	NA	NA	NA	TACTGCTTCTTCTTGGCATCCTGGACTCTGTAACCCTAGAATTTACTGTGTTTGGGAAACCCAGGTGGGG
Rpl23a			NM_207523	ribosomal protein L23a	-1.0246	-2.7254	2.60339	0.644321	0.304953	30.3226	-0.50915	-1.38907	36.914	0.925138	1.16467	6.73326	AAGAAGATCCGAACGTCACCCACCTTCCGGCGGCCCAAGACCCTGCGGCTCCGGAGGCAGCCAAAATATC
Wdr36			NM_144863	WD repeat domain 36	-0.435376	-2.72525	2.60496	-2.25826	-0.791126	0	-0.266343	-1.69335	22.5481	-0.33309	-0.688704	28.9114	TCATGCGGAGCTTTTTAAGCATGATTGGAATGATGTTGGACAGAAAGCGTGATTTCGAGTTGGCCCAGGC
Mpst			NM_138670	mercaptopyruvate sulfurtransferase	-1.07647	-2.72447	2.61347	0.874269	0.412562	18.35	NA	NA	NA	NA	NA	NA	GCGCTTCCAGGTGGTGGACGCCCGCGCAGCTGGCCGTTTCCAAGGCACCCAGCCAGAACCCCGAGATGGT
Rpl26			NM_009080	ribosomal protein L26	-1.087	-2.72292	2.63048	-0.0879321	0.0438232	57.5257	-0.616908	-1.49436	31.3858	0.130175	0.119445	84.4536	CATTCGGAGGAAGATCATGTCTTCCCCTCTTTCCAAAGAGCTGAGACAGAAGTATAACGTTCGGTCTATG
Srp72			XM_132143	signal recognition particle 72	-0.344803	-2.72194	2.64116	-0.442389	-0.0965272	58.026	-0.297831	-2.46201	5.06853	0.186979	0.244283	78.734	TTATTTATCTAAACTTCATCTGTATTAACATCTAGTAACTATTTGGGGGAGGTCTTTAACTGGCTCAGTG
Mnd1			NM_029797	RIKEN cDNA 2610034E18 gene	-0.407552	-2.7212	2.64929	0.297922	0.194148	43.7884	-0.144069	-0.424559	87.9909	0.384539	0.644982	40.8877	GAGCCATGCTTGCAAAAGAACTTTCTTCATTTCGAGACCAAAGGCAACAACTTAAGGCAGAAGTGGAAAA
Scpep1			NM_029023	serine caroboxypeptidase 1	-0.448004	-2.7204	2.65813	-0.340821	-0.0540985	59.429	-0.185514	-0.784288	72.89	0.147393	0.128227	84.2164	TCTGCTTCCCAAAGAGTATTTAAAACCAGACTCATTTAATCAAAGTGAAGGGTTGCAATCGATTGGTCTC
Mterfd2			NM_178051	Mus musculus RIKEN cDNA 4933412H03 gene (4933412H03Rik), mRNA.	-0.388913	-2.72003	2.66215	0.353412	0.221153	40.5616	-0.246164	-1.35211	38.9775	-0.00468702	-0.133776	79.8176	TCCGTTCCCTCCAGGACATGGGTTTTGCTGAAGCCCACATTCACAGCTTGTTTAGTATACAGCCAAGTGT
Sil1			NM_030749	RIKEN cDNA 1810057E01 gene	-0.405896	-2.71927	2.67051	-0.56215	-0.14482	54.9508	-0.162375	-0.747754	74.8471	0.28223	0.425528	63.3397	ACTAGGGCGTCTCCAAGCAGAGTACCAAGCCCTGGCCTCCCTGGAGCTCCAAGAAGGCGAAGATGATGGC
Zfp207			NM_011751	zinc finger protein 207	-0.394496	-2.7184	2.68013	-0.649561	-0.167096	53.0648	-0.237008	-1.77097	19.6795	-0.306284	-0.659453	31.4206	ATGCGACCTCCAATGCCACCTCATGGTCAGTATGGTGGTCATCATCAAGGCATGCCAGGTTATCTTCCTG
Deadc1			NM_025748	deaminase domain containing 1	-0.637161	-2.71478	2.72013	-1.93273	-0.44356	20.8966	-0.280237	-1.13176	52.1575	-0.926469	-0.493639	47.2863	CTGACCGAGAGCCGCTGACGTCGCTGGTCACGTTTATATGTTATTACTGTGTGTAAAAATGGTGTCGCTC
Rpl41			NM_018860	ribosomal protein L41	-1.34014	-2.71324	2.73718	0.467871	0.227463	39.7946	-0.855525	-1.70773	21.9928	0.618256	0.50361	55.3652	ACAAGCTATCGGACTGTGTGCTGCCATCGGTAATGAGTCTCAGTAGACCTGGAACGTCACCTCGCCGCGA
Got1			NM_010324	glutamate oxaloacetate transaminase 1, soluble	-0.386103	-2.71099	2.7622	-1.00858	-0.273835	41.2961	-0.216633	-1.21243	47.2044	NA	NA	NA	GAGGGGAAGCAGCTGCTGTTTAGCTGACCCCCCACATGAGAAGACGTTTCTTGAAATGAGCCCCGGGGGC
Gpsn2			NM_134118	glycoprotein, synaptic 2	-0.319574	-2.70357	2.84529	-0.742247	-0.214612	48.2636	-0.110323	-0.45806	87.0814	0.348979	0.528007	52.8277	AGGGCAAACACCGCAGCTACCTGAAGGAGTTCCGCGACTACCCGCCCCTGCGCATGCCCATTATTCCCTT
Lmf1			NM_029624	RIKEN cDNA 2400010G15 gene	-0.516536	-2.70124	2.87152	0.337106	0.214413	41.3763	-0.366055	-2.00298	12.8095	0.444479	0.783775	28.2047	CAGCACGCCACCCAGGGCAAGTGGTGGATCCGCAAGCGAATTGGTCCTTACTTCCCCCCACTCCGCCTTG
Endog			NM_007931	endonuclease G	-0.445816	-2.69824	2.90551	-1.94727	-0.689114	2.70846	-0.191311	-1.02505	58.7545	-0.478049	-0.951989	11.626	AGGCTGATGGGAAGTCCTATGTGAAGTACCAGGTTATTGGGAAGAACCACGTGGCAGTGCCCACACACTT
Pcca			NM_144844	propionyl-Coenzyme A carboxylase, alpha polypeptide	-0.458348	-2.6974	2.915	-0.768752	-0.225289	47.0697	-0.139414	-0.497168	85.8643	-0.0711457	-0.281015	68.5222	GGGAGCTCTCGGTAAAGTTACATGATGAAGATCATACTGTCGTGGCATCTAACAATGGGCCGGCATTTAC
Nit2			NM_023175	nitrilase family, member 2	-0.568754	-2.69604	2.93048	-1.14162	-0.37571	28.6577	-0.270877	-1.02429	58.8017	-0.396986	-0.691528	28.6749	AGCTCTTGGTGTATCCTGGAGCTTTCAATCTGACCACAGGACCAGCCCACTGGGAGCTGCTTCAGCGAGC
Wdr21			NM_030246	WD repeat domain 21	-0.405474	-2.68841	3.01772	-0.535279	-0.132877	55.8462	-0.198469	-0.762681	74.0555	0.0165702	-0.0945694	81.9071	TTTATAAATGGTGCTTGCTGTATGCAAGTGGAGTCCTTCAGCCTCGGAGGGCAGAATGCAAAGCGACTGA
Freq			NM_019681	frequenin homolog (Drosophila)	-0.813537	-2.68455	3.06215	0.00102149	0.0761413	55.4648	-0.536837	-1.61057	25.9631	0.243595	0.280398	76.2157	AACCACTAGCCTCTTTCTGTGCCATGAGGCCACCGCAGCCTGACACCGCCCCTGTGCCCACCCAGCCTTC
Spp1			NM_009263	secreted phosphoprotein 1	-0.339427	-2.68085	3.10509	0.750974	0.330026	27.3436	-0.168274	-1.11531	53.1753	0.573199	0.512651	54.4256	GGGCTCTTAGCTTAGTCTGTTGTTTCATGCAAACACCGTTGTAACCAAAAGCTTCTGCACTTTGCTTCTG
Nae1	Appbp1		NM_144931	amyloid beta precursor protein binding protein 1	-0.359021	-2.67666	3.15394	-1.09474	-0.347556	32.1061	-0.152477	-0.751093	74.671	NA	NA	NA	AGGGAAGTTGAAGTCCTGTCTTACTGGCTTCCTTCAGGAATATGGGCTGTCTGTAATGGTGAAAGACGAT
Peli2			NM_033602	pellino 2	-0.490325	-2.67601	3.16154	-0.154718	0.017757	58.7098	-0.352407	-1.65041	24.2733	0.104336	0.0631044	85.3341	CAAGTACTGGTCGCAGATCCCACTGCCCCACGGAACGCACGCGTTTCACGCCGCCTGTCCGTTCTGCGCC
P2ry13			NM_028808	Vpurinergic receptor P2Y, G-protein coupled 13	-0.451751	-2.67511	3.17198	-0.68042	-0.16966	52.831	-0.207499	-0.883376	67.2862	0.242663	0.187515	81.9446	TTCCTATTGATTAGTGACACCCAAAGTTGCTGTCCCTTACTCCAGGTAACCTTACCTGCCCAACCTCCTC
Ergic3	Sdbcag84		NM_025516	serologically defined breast cancer antigen 84	-0.427714	-2.6729	3.19791	0.0768693	0.107883	52.8794	-0.240318	-1.09876	54.1999	0.130587	0.107734	84.7287	TGACCATCGTCAGTGGCCTTCTCATGCTCCTGCTTTTCCTATCGGAGTTGCAGTATTATCTCACTACGGA
bsid(861397)	2410008K03Rik		XM_125970	RIKEN cDNA 2410008K03 gene	-0.503775	-2.66781	3.25801	-0.00259965	0.0780099	55.3272	-0.433248	-2.61251	3.78213	0.436386	0.665158	38.9187	TGCTTTCCTAGCCAGATGAGTTCAGCAGTGCACTCCCTTCGCGGGACTCCGAAGGAAGAATTAAATCTCA
Abhd11	Wbscr21		NM_145215	Williams Beuren syndrome chromosome region 21	-0.541443	-2.66498	3.29146	-2.34464	-0.812755	0	-0.134728	-0.292782	90.3255	-0.790076	-1.39295	1.15349	ACTGGGTCCACAGCGACAAACCCCAAGACTTCATGGATGCTGTCACCAGCTTCTTGGCTTAAGAAGTAGC
Ptgdr			NM_008962	prostaglandin D receptor	-1.50729	-2.66115	3.33709	0.55354	0.253642	36.5857	-1.11721	-2.09777	10.6316	1.70874	1.50009	1.14522	CGTGTGTGTGTCCTAGTTTTAGAAGGTATGCTATGGTAACTGTCTAGAGAATTTGATAAAGTGCCAGATG
Fip1l1		1	NM_024183	Mus musculus FIP1 like 1 (S. cerevisiae) (Fip1l1), mRNA.	-0.411387	-2.66057	3.34404	NA	NA	NA	-0.154463	-0.705586	77.0183	NA	NA	NA	TAGACGTCGCCATGAAAGTGAAGAAGGGGACAGTCACAGAAGACACAAGCACAAAAAGTCTAAAAGAAGC
Prmt7		3	mSQ029607	cDNA sequence BC006705	-0.296929	-2.65586	3.40047	-3.58253	-1.35764	0	-0.12444	-0.688632	77.8619	-0.424135	-1.01091	9.06233	GTTTCACCCCCTCACTGGAGACATCACCATGGAGTTTAGGCTTGCAGACACCTTGAGCTGATCTCTTATT
Grhpr			NM_080289	glyoxylate reductase/hydroxypyruvate reductase	-0.405965	-2.65411	3.42161	-1.14088	-0.34495	32.4293	-0.224755	-1.29223	42.4315	-0.0915323	-0.234187	72.6104	TGGGCTTGCCACTTTGGGGGCTTGCCACATACTTGCCAAAAGCCTGTAATTCTAGCATTAAACAACTTCT
Pitrm1			NM_145131	pitrilysin metalloprotease 1	-0.329675	-2.65258	3.43998	-1.72209	-0.59612	7.66569	-0.222091	-1.40304	36.1498	-0.325821	-0.704987	27.5621	GACTGGCAAAAACTCTGAAGGAAATTCTGAGACCATGAAGAAATCATTAATCATGCATTAAATGACAGCA
Gpatch4			NM_025663	RIKEN cDNA 2610029K21 gene	-0.452469	-2.64933	3.47934	-3.65348	-1.38543	0	-0.106392	-0.264602	90.5625	-0.428154	-1.01281	8.98708	CAGCTCACCAGCTAAAGGATGGTGGGAAGAGGAATCAGGATGGAGGAATATTTGGAGTGTCTCTTTTAAA
AI586015			NM_019992	expressed sequence AI586015	-0.512296	-2.64681	3.50996	-0.83656	-0.240176	45.3517	-0.169735	-0.671876	78.6775	0.0240474	-0.0667194	83.1106	CACACAATGCATGAAGTAACATGACACCTTTCTTCATTTATCTCAGTATTTATTATTTTCAAAAGGAAGA
Ssr3			NM_026155	signal sequence receptor, gamma	-0.498317	-2.64543	3.52681	-1.91917	-0.471087	18.0402	-0.268382	-1.30234	41.84	-1.23044	-0.745811	24.3383	TCCACCATTGAACATTGCACATAGGATTACGAAGTGTTCAGTAAGACAGTGAAATCTGTGGCAGGCAGAG
0610009F21Rik			mSQ002737	RIKEN cDNA 0610009F21 gene	-0.346838	-2.64344	3.5511	-0.432466	-0.0880136	58.4105	-0.119792	-0.208616	90.7559	-0.0221075	-0.134279	79.7879	GTCCAGGTCCCGCTCCTGGCCCCCTCATCCCATGGTTCAGGTCCCTTTTGCTATCCCTATTACTACTTTC
2610028A01Rik	Pinx1		NM_028228	PIN2/TRF1-interacting protein	-0.423034	-2.64315	3.55469	-2.72271	-1.00664	0	-0.15259	-0.567681	83.2823	-0.627854	-1.35579	1.42743	TCTGTCCTCTCGGAGTGAAACCGACCTGGACTGCATTTTTGGAAAAAGGAGGAACAAGAAGCTTGCTCAG
Sirt5			NM_178848	Mus musculus sirtuin 5 (silent mating type information regulation 2 homolog) 5 (S. cerevisiae) (Sirt5), mRNA.	-0.290122	-2.63977	3.59611	-0.017253	0.0677957	56.0556	-0.211801	-1.16586	50.0538	0.334643	0.388943	66.9069	AGAAGGACCTGCAGTACGGTATCCTGGAGTGCTAAAGCAGGGCACTAACGGGAAAAATGGCTTTATGGAT
Dapp1		1	NM_011932	dual adaptor for phosphotyrosine and 3-phosphoinositides 1	-0.460007	-2.63751	3.62395	-0.283056	-0.0327306	59.6248	-0.239124	-1.22774	46.2767	-0.0481123	-0.22437	73.4164	GAGTGCTCAGCTGTTCAATTTGATTACTCACAGGAACGAGTAAACTGTTTCTGCCTAGTGTTTCCATTCA
bsid(964958)	Rpl23		NM_022891	ribosomal protein L23	-0.900734	-2.63614	3.64086	0.261343	0.185846	44.7559	-0.53431	-1.63844	24.7718	0.856399	1.62243	0.703608	CTTAAATTTCAGTTCAGGGCATGACCTTCATGACCTTGCAGAACTTCTTCACTTTCCAGGTTAAGTAAAG
Ckmt1			NM_009897	creatine kinase, mitochondrial 1, ubiquitous	-0.511518	-2.63612	3.64113	-0.518183	-0.124609	56.4157	-0.147981	-0.243961	90.6765	-0.133376	-0.368609	60.0671	ACTTCTGCATATTTAACAGTGGCCTAGTCTACTTGCCCTGGACCTGCCTCTCTCCCTGTCCTAGTAAAGA
Vkorc1			NM_178600	Mus musculus vitamin K epoxide reductase complex, subunit 1 (Vkorc1), mRNA.	-0.656151	-2.63596	3.64305	0.0235566	0.0893154	54.4546	-0.226687	-0.643456	80.0167	0.611647	0.941935	16.8259	GCGGACAGCGTCCTCAACCAATCCAACAGCATATTTGGTTGCCTGTTCTACACCTTACAGCTGTTGTTAG
Cd44			NM_009851	CD44 antigen	-0.469647	-2.63186	3.69396	-0.304963	-0.0411937	59.5897	-0.256181	-1.42521	34.9552	-0.08206	-0.270672	69.4573	GATGTACTGTGTCTTTGTGTAAGTCCTATGTGTTGACTTTTCAAATATAGCCAATTGCTTAGGTATGTAC
Rps18			NM_011296	Mus musculus ribosomal protein S18 (Rps18), mRNA.	-1.06776	-2.62963	3.72161	NA	NA	NA	-0.521336	-1.66975	23.4837	-1.48873	-1.85348	1.27523	ACTGTGGGTGTATCCAAGAAGAAATGAGTCTCTGGGCCTTTGCTGTTAATAAATAGTTTATATACCTATG
Tmem48			NM_028355	RIKEN cDNA 2810475A17 gene	-0.521702	-2.62775	3.74507	-1.48881	-0.481497	17.0101	-0.254323	-1.07094	55.9224	0.391282	0.390672	66.7419	CTCAGCAGAATAACCGAAAACTGCCTTTTCTGTACCCAGTGCTTTTTGTGTGTGTGGTATAATAAAATCT
Xpa			NM_011728	xeroderma pigmentosum, complementation group A	-0.421807	-2.62745	3.74885	0.346838	0.209175	42.0057	-0.223723	-0.977085	61.6899	0.134612	0.111125	84.654	GTTCCTTGTGAAGAAGAACCCACGCCATTCACAGTGGGGCGATATGAAGCTCTACCTAAAGCTACAGGTG
Man2b2			NM_008550	mannosidase 2, alpha B2	-0.422445	-2.62436	3.78757	-0.400286	-0.0790059	58.7623	-0.351962	-1.74436	20.6279	0.519769	0.859077	22.3425	TACCCTAAGGAAATCCGGACCTTCTTCATTAAATTCCAGCAGTGACATCAATGCATTGGCCCCAGGGACA
Eef1b2			NM_018796	eukaryotic translation elongation factor 1 beta 2	-1.00396	-2.62243	3.81179	-0.311281	-0.0422741	59.5812	-0.624915	-1.57181	27.6902	0.30096	0.426447	63.2482	GTGTAGAAGACACCACAGGAAGTGGAGCTGCAGATGCTAAGGATGATGACGACATTGATCTCTTTGGATC
Retsat			NM_026159	RIKEN cDNA 0610039N19 gene	-0.405512	-2.62172	3.82075	-1.34147	-0.453985	19.7929	-0.246921	-1.49542	31.3328	-0.0444409	-0.217057	74.0041	GCACCTCCCCAACTTCTCGTGGTGTCCTCCCTCCTACAGCAATTCCTTGCACATATAAACAAAAACCATT
Psrc1			NM_019976	RIKEN cDNA 5430413I02 gene	-0.480388	-2.61786	3.86945	2.38193	0.960635	0	-0.45541	-3.05361	1.92988	0.577904	0.72127	33.6506	AGAAGAAGAGAGGGGCAGAGGTCATCTGCCCGTGGAGAAACTCACAAACAAAATAATAAATGCAGGCAGA
Raet1d			mSQ030470	retinoic acid early transcript delta	-0.288024	-2.61627	3.88962	-0.291701	-0.0353203	59.62	-0.149224	-0.647759	79.8177	0.161986	0.159993	83.1419	TGGAAAGATGATGGGGAATTTGTGAAACAATTGAAATTCTTGATACACGGATGCAGTCAGAAAATGGATG
Parp3	Adprtl3		NM_145619	ADP-ribosyltransferase (NAD+, poly (ADP-ribose polymerase)-like 3	-0.351973	-2.61603	3.8927	-0.674749	-0.185738	51.2939	-0.176265	-0.634299	80.4357	0.487562	0.747276	31.326	GAAGCCAATGTTCTGGTTAGGGATGGACTGCACAGCTTAGATCACCTAATGACACCGTTGTCATCAGTTT
Pcdhgc3			NM_033595	protocadherin gamma subfamily A, 4	-0.50445	-2.61525	3.90255	-0.568658	-0.139782	55.3389	-0.236734	-1.0228	58.8929	0.0311402	-0.0599027	83.3683	TTACAGTAGTGTAGAAGATCCCCCTCCCCCGCTGGTGTAGAATAGCCAATAGTATAGTGTGGTGTGCTTT
Pcdhgc3			NM_033595	protocadherin gamma subfamily A, 5	-0.507758	-2.61008	3.96856	-0.440081	-0.0921223	58.2311	-0.23289	-1.05567	56.8667	0.26225	0.335097	71.8089	TTACAGTAGTGTAGAAGATCCCCCTCCCCCGCTGGTGTAGAATAGCCAATAGTATAGTGTGGTGTGCTTT
Arts1			NM_030711	type 1 tumor necrosis factor receptor shedding aminopeptidase regulator	-0.403066	-2.6089	3.98357	-2.0556	-0.730305	1.17741	-0.261814	-1.40356	36.1216	0.122011	0.0954137	84.9666	TTGTGAGTCACTGATCCCTTAAGTAGGGAGTAGGGTTGTAAATTCCTAAATAACTCATAATAGCACTTAC
Golm1	Golph2		NM_027307	golgi phosphoprotein 2	-0.343407	-2.60803	3.99476	-0.303648	-0.0412199	59.5895	-0.204551	-1.14762	51.178	0.0344134	-0.0715769	82.918	CTGGAACAAAGGGATGCACCACTTTCCAACAAGACCTGAAACTCAGCGGCCTACAAACTCCTACCTGATA
Rpl28			NM_009081	ribosomal protein L28	-0.914466	-2.60712	4.00647	0.03268	0.0925639	54.1914	-0.570974	-1.85654	16.8666	0.344123	0.557544	49.758	CCATTAGGCCTCCAAAATGTTTTGTGCTCATTGAGCTGTGGCTCTGCGCTGTCTTTAGTTGTGCTATCAA
Rps8			NM_009098	ribosomal protein S8	-1.1455	-2.60521	4.03102	-0.146353	0.020099	58.6222	-0.536113	-0.976435	61.7295	0.587083	0.789646	27.719	GACCCTGGTGAAGAACTGCATCGTGCTTATTGACAGCACGCCGTACCGACAGTGGTACGAGTCCCACTAT
Pigu			BC028278	Mus musculus cDNA sequence BC028278, mRNA (cDNA clone IMAGE:5374066), partial cds.	-0.387551	-2.60367	4.0509	-1.15132	-0.352674	31.4731	-0.164422	-1.05286	57.0402	-0.163254	-0.340214	62.8924	GAGCACTTCAGCCTCTTTTTTGTCTGCGTGTTTCAGATCAACGTCTTCTTCTACACAGTTCCATTAGCCA
1810009K13Rik			NM_025462	RIKEN cDNA 1810009K13 gene	-0.611092	-2.60337	4.05467	-2.43991	-0.893779	0	-0.159019	-0.366109	89.2734	-0.142984	-0.422681	54.5632	CTCCTCCATGTGACTTTATCTTTAGGGGCAAAGCTCAACACATGCTCCTCTGCTCATCCAACCTGCATTA
Slc39a6			NM_139143	solute carrier family 39 (metal ion transporter), member 6	-0.397268	-2.60034	4.09387	-2.80539	-0.968927	0	-0.220437	-1.05561	56.87	-0.127222	-0.237354	72.3464	CGTTGAGAGGGGGAAATTCTAGATGTGTTTTAAAGGGGCATGTTTAGTTCCGAGTACGTGCGTGGACATC
Pdlim2			NM_145978	Mus musculus PDZ and LIM domain 2 (Pdlim2), mRNA.	-0.344771	-2.59991	4.09946	NA	NA	NA	-0.231325	-1.43991	34.1758	NA	NA	NA	GTCTGACACACTCTCCAGGCCTTGCTGCTGCTCACCACTTGACCTACCCTGGCCACCCCACCAGCCAACA
Pcdhgc3			NM_033595	protocadherin gamma subfamily A, 9	-0.453487	-2.59777	4.12731	-0.633897	-0.16538	53.2194	-0.174569	-0.699542	77.3211	-0.0331413	-0.169787	77.5159	TTACAGTAGTGTAGAAGATCCCCCTCCCCCGCTGGTGTAGAATAGCCAATAGTATAGTGTGGTGTGCTTT
Lip1			NM_021460	lysosomal acid lipase 1	-0.452478	-2.59527	4.15976	NA	NA	NA	-0.247682	-0.934297	64.273	NA	NA	NA	GAAATCCAGTGTAATCCCAGCTTCTCCAGGAATAAATATCCTCTCTTCAGTTTCATCAGACCTCAATAAC
Csnk2a1			NM_007788	casein kinase II, alpha 1 polypeptide	-0.432894	-2.59506	4.16257	-0.668321	-0.186787	51.1896	-0.219126	-0.373105	89.1404	NA	NA	NA	CTCTGGTGTGCCACCGAAGAGCCCTTTAAATAAATCGAAGCTTAAAAGAAAAAAAGGAGTCATTGCAGAA
Ugt1a6a	Ugt1a6		mSQ021437	UDP glycosyltransferase 1 family, polypeptide A6	-0.318741	-2.59491	4.16448	-0.262815	-0.0250257	59.6088	-0.209473	-1.26999	43.7446	0.2011	0.261465	77.5785	ATAACAATCTAATTGCTGGCCACACCCATCAGGGAAGGTTCTAGTATATGTGATGTGCTTTTCCAGTATC
Ttc27			NM_152817	RIKEN cDNA 2610511O17 gene	-0.359683	-2.59469	4.16739	-3.06851	-1.05733	0	-0.138642	-0.742748	75.1099	0.191372	0.179145	82.3343	CTCTTCTGCTTTCTCCAATTCCTCCAGTACCTGTATTTCTGAAACACAAGATACCCGTTTTTAAAATAAA
Mrps5			NM_029963	mitochondrial ribosomal protein S5	-0.329158	-2.58684	4.27045	NA	NA	NA	-0.206665	-1.19786	48.0922	NA	NA	NA	GCTGACAGCACCCGGAGGACACGCCACTCTCACTTTTTATTTTAAAAAAAGTCCAACCTTCTTTGTTTTC
Supv3l1			NM_181423	suppressor of var1, 3-like 1 (S. cerevisiae)	-0.398596	-2.58385	4.30994	-1.50678	-0.524663	13.0553	-0.311788	-2.16464	9.29296	-0.305159	-0.778608	21.9157	GAGAGAAAGTGGGGACACGGAGAAAGAAGAAGGACCCCGACTCCGATTAGGTTTTTTTAATTTTGCAAAT
Alox5ap			NM_009663	arachidonate 5-lipoxygenase activating protein	-0.654895	-2.5796	4.36627	0.563079	0.29721	31.2571	-0.335606	-1.19988	47.9687	0.213015	0.23575	79.2776	TCCTGTTCCTCATGTCCTTCGCCGGGATACTCAACCATTACCTCATCTTCTTCTTCGGAAGCGACTTTGA
Pcdhgc3			NM_033595	protocadherin gamma subfamily A, 2	-0.462801	-2.57733	4.39656	-0.615615	-0.161032	53.6045	-0.220468	-0.9864	61.1227	NA	NA	NA	TTACAGTAGTGTAGAAGATCCCCCTCCCCCGCTGGTGTAGAATAGCCAATAGTATAGTGTGGTGTGCTTT
0610007P22Rik			NM_026676	RIKEN cDNA 0610007P22 gene	-0.363253	-2.57658	4.40664	-0.707104	-0.204903	49.3172	-0.19762	-1.12124	52.8081	-0.146433	-0.469363	49.7666	ACATATTATTGAAGCTGGTGTGCATTATTCAGAAGTGGCAGTAGGACCTGGGGATGGACGGGCCTGCTGG
Pcdhgc3			NM_033595	protocadherin gamma subfamily A, 11	-0.489256	-2.57579	4.41719	-0.456468	-0.0992212	57.894	-0.237089	-1.03062	58.4117	0.194072	0.218372	80.3195	TTACAGTAGTGTAGAAGATCCCCCTCCCCCGCTGGTGTAGAATAGCCAATAGTATAGTGTGGTGTGCTTT
Acot8	Pte1		NM_133240	Mus musculus peroxisomal acyl-CoA thioesterase 1 (Pte1), mRNA.	-0.261994	-2.57508	4.42672	0.0302994	0.0915126	54.2772	-0.0428497	0.18568	83.3269	0.207528	0.269552	77.0075	AGGAAGGCATTACTGGGTACCTACCTCCCAGCGGCTCTTTGGGGGTCAAATTATGGGCCAGGCCCTGGTG
bsid(876281)	2410001E19Rik		XM_134644	RIKEN cDNA 2410001E19 gene	-0.376805	-2.57441	4.43562	-0.397785	-0.0759273	58.8694	-0.18878	-0.936219	64.1579	-0.00576642	-0.16479	77.8559	ATGAACATGTATCAAGGAGCCAGGGATTTTGTCAACTAGAGTATGGGTGCTGTCCTGCCCTAGCAGTGAA
Hmga1			NM_016660	high mobility group AT-hook 1	-0.560076	-2.57357	4.44695	-0.671737	-0.180758	51.7826	-0.179085	-0.427854	87.9071	1.1056	0.7879	27.863	TAGATACCCACTATTGCTGCTGCTACCAGCGTCAGATGTTCATCCTCCTGAATTTGCCTGTATTCTCTCC
Sypl			NM_013635	synaptophysin-like protein	-0.43066	-2.57327	4.45089	-1.49637	-0.465534	18.6013	-0.270934	-1.38744	37.0041	1.09222	0.617255	43.6486	TGTGTAGAGGTAACTTTGCACTTGTGCTGCATGGGTATATCCATTATTTCTGGTGGTTTCTTAGGCTTGC
Tap1			NM_013683	transporter 1, ATP-binding cassette, sub-family B (MDR/TAP)	-0.396364	-2.5654	4.55708	0.661349	0.334642	26.8047	-0.267452	-1.29536	42.2482	NA	NA	NA	CCACCTGCAGCTCATGAAGAGAGGAGGGTGCTACCGGGCCATGGTAGAGGCTCTTGCGGCTCCTGCAGAC
Atic			NM_026195	5-aminoimidazole-4-carboxamide ribonucleotide formyltransferase/IMP cyclohydrolase	-0.548012	-2.55857	4.65011	-3.29573	-1.12454	0	-0.0822502	-0.185371	90.7305	-0.0414816	-0.147711	78.9684	CGTAGATAATCATGTGTGGGGTCTTGGAAGTACCTCTAGAAGAGTCATTTGTATCTTAATATCTGGGTGT
Cdkn2a			NM_009877	Mus musculus cyclin-dependent kinase inhibitor 2A (Cdkn2a), mRNA.	-0.805564	-2.55845	4.65177	-0.306472	-0.0416224	59.5864	-0.116188	-0.0949086	90.0775	0.0523731	-0.0280974	84.3721	TTTTCTTGGTGAAGTTCGTGCGATCCCGGAGACCCAGGACAGCGAGCTGCGCTCTGGCTTTCGTGAACAT
Zfand1			NM_025512	RIKEN cDNA 2310008M20 gene	-0.400161	-2.5552	4.69625	0.478039	0.265484	35.1304	-0.246678	-1.11601	53.1318	-0.130022	-0.396113	57.2819	ATATTATTTAAAGGAAGTCCTATGATTAAACCTCATATTATGTCCAGAATACATAGCCTTACTGGATACC
Alg8			NM_199035	asparagine-linked glycosylation 8 homolog (yeast, alpha-1,3-glucosyltransferase)	-0.395496	-2.5519	4.74176	-1.55494	-0.546137	11.284	-0.267653	-1.43067	34.6647	NA	NA	NA	TGCCCTGCCTAGCAACCTGATTGTTTCCATGGTGAGGAGCCACTTGCCCTCTATAAGCAACAAAACACTT
Polr3c			XM_131049	polymerase (RNA) III (DNA directed) polypeptide C	-0.400724	-2.54972	4.7719	0.0489517	0.100081	53.562	-0.257266	-1.2025	47.8091	-0.0686119	-0.290361	67.6633	AGATCCAGGTGGATGAAACCATCTTCTTACTGGAATCATACATTGAGAGCACCATGAAGAGGCAGTGACC
Pcdhgc3			NM_033595	protocadherin gamma subfamily B, 7	-0.461666	-2.5497	4.77216	-0.628631	-0.165661	53.1942	-0.174134	-0.762649	74.0572	0.026268	-0.0774684	82.6746	TTACAGTAGTGTAGAAGATCCCCCTCCCCCGCTGGTGTAGAATAGCCAATAGTATAGTGTGGTGTGCTTT
Kdelr1			NM_133950	KDEL (Lys-Asp-Glu-Leu) endoplasmic reticulum protein retention receptor 1	-0.843257	-2.54717	4.80712	0.833397	0.398616	19.7616	-0.449201	-1.30293	41.8052	NA	NA	NA	CCATGTTTTTGTACAGAATTTGATGGCTGATTCTTTGTTCTCTTGAAATAAACCAAGAAACCTGTCCTTC
Gstp1			NM_013541	glutathione S-transferase, pi 1	-0.28662	-2.54624	4.82012	-0.607181	-0.156598	53.987	-0.118646	-0.390875	88.7776	0.316142	0.45795	60.0713	TGTCTACGCAGCACTGAATCCGCACCCAGCAGGCATGCCACCATACACCATTGTCTACTTCCCAGTTCGA
Slc3a2			NM_008577	solute carrier family 3 (activators of dibasic and neutral amino acid transport), member 2	-0.423739	-2.53924	4.91772	-1.86757	-0.642572	4.91241	-0.226028	-1.14058	51.6128	-0.807842	-1.51255	0.707899	TAGTCTTCCTCTCCTTGTTTTTAAACTTTTGCAGATTACATACGAATTCTTATACTGGGTGTTTTTGTCT
Dhrs8			NM_053262	Mus musculus dehydrogenase/reductase (SDR family) member 8 (Dhrs8), mRNA.	-0.725951	-2.53773	4.93892	1.22356	0.546049	7.44674	-0.237717	-0.696877	77.4539	0.959928	1.51518	1.06183	GCACGGGATCCTCACTGAGAAGCAAATGATTTTCGTTCCGAGTTCCATAGCACTTCTGACAGTATTGGAA
Ptges2			NM_133783	prostaglandin E synthase 2	-0.449123	-2.53741	4.94343	-1.97145	-0.706802	2.00552	-0.256486	-1.2582	44.4465	-0.265794	-0.630396	34.0141	AGCTGTTCTGTGGGTAAAGGGTCTGGGGTCTCAAAGGCCTACCCTTCAACCCCAGTTCAGAGGCCTGGTC
Ppp2r1a			NM_016891	protein phosphatase 2 (formerly 2A), regulatory subunit A (PR 65), alpha isoform	-0.37807	-2.53584	4.96559	-0.222827	-0.00880276	59.4277	-0.224719	-1.35886	38.5963	0.057031	-0.0216004	84.5361	CTATCATCCCCAAGGTCTTAGCCATGTCTGGAGACCCTAACTACCTGCACCGAATGACTACACTCTTCTG
Sox16			mSQ031241	SRY-box containing gene 16	-0.424875	-2.53529	4.97331	NA	NA	NA	-0.170864	-0.822979	70.749	NA	NA	NA	ATTCTGAGATCTCGAAGCGCTTGGGCGCTCAGTGGAAGCTGCTGGACGATGAAGAGAAGAGACCCTTCGT
Ncf4			NM_008677	neutrophil cytosolic factor 4	-0.444251	-2.53339	5.00009	-1.28206	-0.429645	22.4093	-0.215386	-0.969635	62.1425	NA	NA	NA	ACTGATGTAAGATGCAAACCTCCTGGCCCAGAGTGCCTACTGGACAGGATTCTATTAAGTTTTTGACACT
Ide		1	NM_031156	insulin degrading enzyme	-0.280179	-2.53094	5.03474	-2.11942	-0.750514	0.556212	-0.282962	-2.34236	6.46366	0.451965	0.444752	61.4113	TTCACAACATGACTGAGTTCAAGCGTGGCCTGCCACTGTTTCCCCTCGTGAAACCACATATTAACTTCAT
AI586015			NM_019992	Mus musculus expressed sequence AI586015 (AI586015), mRNA.	-0.357354	-2.52943	5.05616	-0.699611	-0.197401	50.1082	-0.0924062	-0.23901	90.6964	-0.191324	-0.515961	45.0274	GTACAAACACTATTGGACGGAGCTGAGAGGGACCACGCTGTTCTTTTACACTGACAAAAAAAGCACAATC
Yars2			NM_198246	RIKEN cDNA 2210023C10 gene	-0.413093	-2.5286	5.06786	-3.0255	-1.09551	0	-0.315232	-0.92416	64.8787	-0.969508	-1.85742	1.28729	GAAAGTGTTCTAGTAATTGGACAACATATTCTCAAGAATGGACTTTCCTTACTTAAAATAGGAAAAAGGA
Gpsn2			NM_134118	Mus musculus glycoprotein, synaptic 2 (Gpsn2), mRNA.	-0.352045	-2.52731	5.08622	-0.943345	-0.208244	48.9583	-0.122385	-0.491402	86.0539	-0.449634	-0.344046	62.5147	ATCAAGCGCCTGCTGGAGACTCTCTTCGTGCACCGATTCTCTCACGGAACCATGCCTTTGCGAAACATCT
Tra2a			mSQ022190	RIKEN cDNA G430041M01 gene	-0.442619	-2.52683	5.09303	-0.558629	-0.13727	55.5267	-0.228636	-1.22297	46.5651	-0.54907	-0.890941	14.7679	GATGGATATTGTGGTAGACATTAGAAATCTGTGGTATGATAAACTGCTTTTTAATCTTCTTGGGGAAGGT
Acadl			NM_007381	Mus musculus acetyl-Coenzyme A dehydrogenase, long-chain (Acadl), mRNA.	-0.473103	-2.52585	5.10709	0.289861	0.195194	43.6655	-0.42043	-2.40071	5.73767	0.20643	0.285701	75.818	AATTAACTGACATTGGAATCAGGAGAATCTTTTCCTCGGAGCATGACATTTTCCGGGAGAGTGTAAGGAA
bsid(938423)	A330035P11Rik		NM_176990	RIKEN cDNA A330035P11 gene	-0.441034	-2.52539	5.11364	-0.722989	-0.207666	49.0206	-0.264642	-0.96838	62.2186	0.179276	0.230395	79.6081	GCCCCGAGACCTGACAGCCTCAACACTCTGGGTAAAGTAAATTAAAAACCCGGACAACTGGAGTCTTTGA
Rad52			NM_011236	RAD52 homolog (S. cerevisiae)	-0.444216	-2.52495	5.11983	0.175078	0.149672	48.7774	-0.28273	-1.06117	56.5264	0.093212	0.0462502	85.3773	AACTGCAGTTTGGTCACAAAATTGTTCCACCTTGGCTCATGCTGAACTCTTTAGAGGACTATAGAGGAAG
Rpl36			mSQ021962	ribosomal protein L36	-0.986307	-2.52438	5.12795	-0.0420349	0.0557748	56.8361	-0.512703	-1.11346	53.2897	-0.0591189	-0.155393	78.4775	CTACCCCATGGCCGTGGGCCTCAACAAGGGCCACAAGGTGACGAAAAACGTCAGTAAGCCGAGACACAGC
Fkbp4			NM_010219	FK506 binding protein 4	-0.365347	-2.51981	5.19347	-1.86728	-0.6578	4.13237	-0.153746	-0.625373	80.8379	-0.352366	-0.796181	20.6797	TGCATCCATTGCCTCTCTTACCTTGCTCTCCTGAGTTGGTATTCCTGATAACGCCCTCTGGTATCACAGT
Acot3	Pte2a		NM_134246	peroxisomal acyl-CoA thioesterase 2A	-0.33215	-2.51958	5.19681	-0.451672	-0.0949982	58.0987	-0.248799	-1.27766	43.2905	-0.0380958	-0.181022	76.7288	ATAAGGCATTGCAGAAACTGCCGTTTTTCGGAAACTCAGTCTCCCAGCGAGCTGTAGTGCTGAAAGAAAG
Alpl	Akp2		NM_007431	alkaline phosphatase 2, liver	-0.575028	-2.51851	5.21216	NA	NA	NA	-0.290168	-0.899061	66.3662	NA	NA	NA	TCCTCAAGCCCAACCCTCCCTGGGGGGAAGACCAGGTCTGCTCAGGATGAGACTCCCAGGAAGCCACCTC
Bclaf1		3	NM_153787	BCL2-associated transcription factor 1	-0.410349	-2.51338	5.28616	-1.13806	-0.357551	30.8721	-0.214063	-0.989699	60.9215	-0.131942	-0.338281	63.0823	GGTAGCAGTCCAAAATGGACTCATGACAAATACCAAGGAGATGGGATTGTTGAAGATGACGAAGAGACCA
C130006E23			mSQ010680	hypothetical protein C130006E23	-0.703755	-2.50949	5.34258	0.309067	0.204057	42.617	-0.435688	-1.07069	55.9379	NA	NA	NA	CTGAGCAGAGAGTCACTATAACAGTTCTCTCTAAGTAGATTAGTTCAATGTCCAATGAAAGTGAACATCT
Mterfd2			NM_178051	RIKEN cDNA 4933412H03 gene	-0.340683	-2.50935	5.34469	0.488193	0.274717	33.9979	-0.181418	-1.10093	54.0658	0.192541	0.253612	78.1164	ACCAAACCAAATGAGGGGTGCTTTGTTGTGGGTTCTTTGGGAGGCCCTACTCCATCCTAAATAAAGGACT
Hibch			NM_146108	3-hydroxyisobutyryl-Coenzyme A hydrolase	-0.299322	-2.50415	5.42058	-1.34613	-0.441614	21.1055	-0.133853	-0.668907	78.8201	0.0607456	-0.0121559	84.7491	TCCAAAATGGAAACCAGCCAATCTAAAAGATGTTACGGATGAAGACTTGAATAGTTACTTTAAATCTCTG
Dhrs8			NM_053262	dehydrogenase/reductase (SDR family) member 8	-0.72418	-2.50366	5.42768	1.1223	0.508321	10.0339	-0.213888	-0.509388	85.4515	0.800102	1.24828	4.48236	TTGTTGGGTACAAAGACAAGTGACGCAGCCTGCTCCGGTTCCCTGAAAGCCGATTGACTGGATCAAAGTT
Tbcd			NM_029878	tubulin-specific chaperone d	-0.400983	-2.50358	5.42885	-0.409992	-0.0839688	58.5756	-0.290324	-1.4829	31.96	0.208939	0.299318	74.7663	TTGCCTACCTAGCTGGGATGTCTCGCCCTGAGGCTCCACAACAAGCTTTACCATCATGGAAACTTGGTGC
Ugt1a7c	Ugt1a12		NM_201643	UDP glycosyltransferase 1 family polypeptide A12	-0.335877	-2.50046	5.47465	-0.260933	-0.0245336	59.6062	-0.217696	-1.30734	41.5485	0.0343427	-0.0650354	83.1756	TGACGGCTTTCTCCCCTGGATTCTCAGACTGCCGTGGCCTTCTCCAGTGTTAGTCATTCTTCATTGTGTT
Pcdhgc3			NM_033595	protocadherin gamma subfamily C, 3	-0.506146	-2.4996	5.48733	-0.646572	-0.169868	52.8118	-0.249014	-1.09889	54.1921	0.0209755	-0.0781337	82.6464	TTACAGTAGTGTAGAAGATCCCCCTCCCCCGCTGGTGTAGAATAGCCAATAGTATAGTGTGGTGTGCTTT
Mocs3			XM_130596	molybdenum cofactor synthesis 3	-0.442695	-2.49941	5.49006	-0.590326	-0.152905	54.2976	-0.228672	-1.11295	53.3215	-0.00733909	-0.14499	79.1385	TGGCCTGGGCCGCCAAAATTGATGGGACATTTCCACAGTACTGAGAGGACAGCATGTGATTCGTGTGGAT
Dhdds			NM_026144	dehydrodolichyl diphosphate synthase	-0.361202	-2.49886	5.4982	-0.0953869	0.0412407	57.6629	-0.202075	-1.06697	56.168	0.14645	0.147428	83.607	TATGTGGCTATAATACAGAGCCCTACAATTAAGGCGGGAATGAGAGGCTGGAGGCAGCAAACGGAATCTG
Cox5a			NM_007747	cytochrome c oxidase, subunit Va	-0.388357	-2.49726	5.52179	NA	NA	NA	-0.10386	-0.21302	90.7539	NA	NA	NA	CTATGATCTGGTTCCTGAGCCCAAAATCATTGATGCTGCATTGCGAGCATGTAGACGGTTAAATGATTTT
Dhrs8			NM_053262	Mus musculus dehydrogenase/reductase (SDR family) member 8 (Dhrs8), mRNA.	-0.651685	-2.4948	5.55814	1.08305	0.500952	10.5853	-0.389938	-0.966962	62.3046	0.785889	1.37467	2.27874	CAAGGCATTTCTCCCAGTGATGATGAAGAATAATCATGGCCACATTGTCACTGTGGCATCAGCAGCAGGC
Tagln2			NM_178598	transgelin 2	-0.474219	-2.49452	5.56232	-2.19456	-0.783587	0	-0.106777	-0.293572	90.3175	-0.187022	-0.384125	58.5006	CAAAGTTGCCTCCCCACAGCATCTTTCCTGCTTTCCTGATCTCTTCTTTTAGTCCATCCCTTGGCTAGGA
Prdx2		3	NM_011563	Mus musculus peroxiredoxin 2 (Prdx2), mRNA.	-0.393303	-2.49117	5.612	-0.012312	0.0725271	55.7255	-0.553398	-1.09154	54.647	0.0661049	-0.00366969	84.9145	TCTCTTTATCATCGATGCCAAGGGTGTCCTTCGCCAGATCACAGTCAATGACCTACCTGTGGGACGCTCT
Xpa			NM_011728	xeroderma pigmentosum, complementation group A	-0.511488	-2.48991	5.63078	1.25759	0.551548	7.10183	-0.302881	-1.23719	45.7063	0.453897	0.581983	47.2357	TGCGACTGTTGTGCTAAATAACTACCACAGATCGAGTGTATAGTGCTCCTGAGATATCTGTAATGACACC
Ap4m1		1	NM_021392	Mus musculus adaptor-related protein complex AP-4, mu 1 (Ap4m1), mRNA.	-0.521118	-2.48796	5.65983	1.06384	0.496552	10.9218	-0.47246	-1.79129	18.9795	0.5309	0.858635	22.3745	GTGGCTCACTCAATGAGGGAACCATCTCACGCAATGTGGCGCTTGTCTACGAACTCCTGGATGAAGTGCT
Dus3l	AW557805		NM_144858	expressed sequence AW557805	-0.432991	-2.48781	5.66215	-0.14485	0.0214019	58.5718	-0.335817	-1.67238	23.3781	0.223511	0.250294	78.3388	AATGGGGACATCCTTTCGTTTGAGGACGCCAACTGTGCCATGCAGACAGGCGTTGCGGGGATCATGGTTG
3300001P08Rik			NM_026313	RIKEN cDNA 3300001P08 gene	-0.481212	-2.48754	5.66621	-0.817374	-0.243437	44.968	-0.18976	-0.659764	79.2553	-0.072235	-0.279689	68.6431	GCTCAGTGTTTACTTGCAAGTTTTCAGTCTTGGACTTTGAAGCCAGGATTCCACGTTAGTGCTCATGTGG
Rpl30			NM_009083	ribosomal protein L30	-0.953984	-2.48492	5.70539	-0.121136	0.0311355	58.1586	-0.571005	-1.37625	37.6231	0.0631974	-0.0116381	84.7599	TATTAGAAGCATGCCAGAACAGACTGGTGAGAAGTAAACAAGAAAGTTTTCCTTTAATAAAACTTTGCCA
Txnrd3			NM_153162	thioredoxin reductase 3	-0.362796	-2.48413	5.71719	-4.48382	-1.67825	0.0566855	-0.0295349	0.148008	84.5811	0.30717	0.407906	65.0771	GCACAGTGAGCCCACCTCCCTTTCCCAGTTGCTAGTGCTTTGACCCCTCACTTTGTTTCCATGAAGAGAT
Lcmt1			NM_025304	leucine carboxyl methyltransferase 1	-0.317638	-2.48376	5.72279	0.0360001	0.09456	54.027	-0.216929	-1.41034	35.7536	0.0424318	-0.0539774	83.5802	CCTCACTTTGTTGGTCCTGCTGCACATCCGGAACCCGTGGTTACAAAGGTGGTCACACCAGATCCTGTTC
Anp32b			NM_130889	acidic nuclear phosphoprotein 32 family, member B	-0.307052	-2.48356	5.72581	-0.674126	-0.180766	51.7818	-0.000403949	0.353837	76.8016	-0.25938	-0.551206	41.5201	CGCCTCCTCCAGCCGCCTCCCTCCGACGGCCCTCGCCGCGCAGGCCGGGTCGCCTCTCCCCCCTCCGCCC
2610204B21Rik			mSQ023134	RIKEN cDNA 2610204B21 gene	-0.491397	-2.47276	5.88891	-1.08973	-0.353378	31.3862	-0.331506	-1.2054	47.6323	-0.399656	-0.950858	11.6796	CATTGCCCATCAGTCCTTCTCCAGAGTGATGCTAGTTGGCATTTCTATAGAGTATTCTGGTTGAAGGGGT
Scrn2			NM_146027	secernin 2	-0.315231	-2.47248	5.89309	-2.06715	-0.727602	1.26673	-0.132588	-0.432846	87.7777	-0.101661	-0.325501	64.3294	AGCAGAGGCTGGAGCAGGAAGGCCTAGAGGCTCTCAGAGGGCTGCTTACGGGTGAACAGACCCCACCAGC
bsid(969294)	Ugt1a13		mSQ019870	UDP glycosyltransferase 1 family polypeptide A13	-0.318599	-2.47211	5.89876	-0.530955	-0.127556	56.2176	-0.216046	-1.62903	25.1695	0.149666	0.132872	84.0803	TGCTTGTGCCGGAATTTGATGAAAACCAAAGTATGTTCTAAGGCAAGTACATCTTCTATTGTGTTCCCAA
Edf1			NM_021519	mRNA, complete cds, clone:1-9 (0610008L11Rik protein) (Endothelial differentiation-related factor 1).	-0.265292	-2.47174	5.90438	-0.452962	-0.100389	57.8353	-0.107712	-0.379345	89.0171	0.239109	0.332476	72.0344	AACGGAACACGGGGGGTTAGGCCTGTGTGCCCCCTCAACCCATAACTGCTGTCAAACAAAGCAAACCTTG
bsid(915119)	1810015A11Rik		XM_358772	RIKEN cDNA 1810015A11 gene	-0.422793	-2.47146	5.9087	-0.910547	-0.272138	41.5048	-0.223376	-0.964232	62.47	-0.247052	-0.538755	42.7496	GATTATTTGGTGCCAGTTCGTGTTGTAGTTACAACCACTTGTTTAAGAGCAATGGGAAGAGGCTGGTGTG
Aldoa			NM_007438	aldolase 1, A isoform	-0.65879	-2.46784	5.96401	-0.0471894	0.0521182	57.0564	-0.253646	-0.887376	67.0524	0.497591	0.486013	57.1886	CTGCTCTAAAGGCCTGGGGTGGGAAGAAGGAGAACCTGAAGGCAGCCCAGGAGGAGTACATCAAGCGCGC
Bcat1		1	NM_007532	branched chain aminotransferase 1, cytosolic	-0.518441	-2.4673	5.97219	-3.46105	-1.29569	0	-0.440566	-2.06945	11.2473	-1.4597	-2.99969	4.04746	GCACAGTCAGTTGGAAGAATTGTCTTATGTTTTAAGATTATCTTGGAATTGAAGCGATTGCCCTGGAAAG
bsid(978494)	Snrpd2		XM_133225	small nuclear ribonucleoprotein D2	-0.586823	-2.46626	5.98806	-1.12426	-0.348288	32.0154	-0.0370441	0.247655	81.0807	-0.250405	-0.515981	45.0254	GAGGAGGAGGAATTCAACACAGGTCCCCTCTCAGTGCTCACGCAGTCGGTCAAGAACAACACGCAAGTGC
Gfm2			NM_177266	RIKEN cDNA A930009M04 gene	-0.42762	-2.46409	6.02144	-1.03027	-0.326429	34.7379	-0.207144	-0.883999	67.2498	-0.0202795	-0.163114	77.9684	CTTAAGCTGCTCACATAAAAGATTCAGTGTTTGATTCAGGGATAGAAAGATTCAATCAATAAAAAGATGG
Surf2			NM_013678	surfeit gene 2	-0.387674	-2.46202	6.0532	-2.15387	-0.752955	0.486614	-0.155044	-0.625962	80.8116	-0.713946	-1.34127	1.55568	CCAGAGAACAGGTTTCTGGGAGCCAGCTTCCAGTGACGAGGAAGACGCCTTGAGTGACGACAGCATGACA
Gdi2	Gdi3	3	NM_008112	Mus musculus guanosine diphosphate (GDP) dissociation inhibitor 3 (Gdi3), mRNA.	-0.550398	-2.46125	6.0651	-0.169346	0.0112296	58.9336	-0.176774	-0.488693	86.1418	-0.222354	-0.4049	56.385	CAGTGAATGGGAAGAAGGTTCTTCATATGGATCAGAACCCATACTATGGAGGAGAAAGTGCGTCTATAAC
Rpl29			NM_009082	ribosomal protein L29	-0.82357	-2.45824	6.11168	NA	NA	NA	-0.440435	-1.31843	40.9046	NA	NA	NA	GGGAGCCGCGGGTTACCGTGAGTGTTGGCCTTACGGCATCCGATGACATCCGTGACTACAGGGCGGCGGC
Ticam1			NM_174989	expressed sequence AW046014	-0.416528	-2.45486	6.16399	NA	NA	NA	-0.173771	-0.474488	86.5899	NA	NA	NA	ACAGACTCCAGGACCTCAGCCTCTCATTATTCACCATGCCCAGATGGTTCAGCTGGGTGTCAACAATCAC
Gfm2			NM_177266	RIKEN cDNA A930009M04 gene	-0.447974	-2.4542	6.17429	-0.723004	-0.200855	49.7466	-0.265899	-1.11478	53.2084	0.32913	0.432135	62.6805	CTGACATCTCTCTTTTAAACCATTGCAAGATGACAGTATCCACACAGGGCAGCCCTCTGGAGTGCTAGTG
0610007P22Rik			NM_026676	Mus musculus RIKEN cDNA 0610007P22 gene (0610007P22Rik), mRNA.	-0.375551	-2.45357	6.18413	-0.846381	-0.25438	43.6645	-0.156259	-0.53713	84.4592	-0.488392	-0.749319	24.0721	AAACATATTATTGAAGCTGGTGTGCATTATTCAGAAGTGGCAGTAGGACCTGGGGATGGACGGGCCTGCT
Pdss1	Tprt		NM_019501	trans-prenyltransferase	-0.339425	-2.45135	6.2187	-2.23301	-0.799365	0	-0.297011	-1.54253	29.0488	-0.549082	-1.18365	3.88781	AAATGTAATTAAACCAGTGTCATTATAGTCCTATAAATTCTAATCGAGGTATCCTGATGGTTATATGTGG
Psmb8			NM_010724	proteosome (prosome, macropain) subunit, beta type 8 (large multifunctional protease 7)	-0.449775	-2.45	6.23965	-0.569633	-0.131585	55.938	-0.0490608	0.0455705	87.4917	0.300624	0.269161	77.0355	TCTCCGTGTCTGCAGCATCCAAGCTGCTTTCCAACATGATGCTGCAGTACCGGGGGATGGGCCTCTCCAT
Alg9	Dibd1		NM_133981	disrupted in bipolar disorder 1 homolog (human)	-0.332233	-2.44208	6.36409	-0.754995	-0.212214	48.5269	-0.184386	-0.937486	64.0819	0.133273	0.0939141	84.9919	TAACTAGGGCTTCCACGGAGCCGACTTCCTCCAAGGCATCCTGTTAGAGCTGTAATAAAGGTCGTCCACC
Dusp11			NM_028099	dual specificity phosphatase 11 (RNA/RNP complex 1-interacting)	-0.696777	-2.43838	6.4225	0.404935	0.2433	37.8567	-0.640968	-2.48027	4.88667	0.421535	0.566806	48.7994	ACTGTCGTCAGGGCCACCTGAGACCAGAGCTGGACAGAAGACAGCTGAATGAATTTAATAAAATCAGGTC
Siglece	Siglecl1		NM_031181	SIGLEC-like 1	-0.443919	-2.43676	6.44823	-0.00467226	0.0787145	55.2748	-0.10703	-0.0647674	89.6751	0.18386	0.246225	78.6074	ATGCCCCTGTGCTGCCCTGTCCACACAACTGCTATTGTGCCCTGGGAATCATAAGCTTGACCTTTTTACT
Clptm1			NM_019649	cleft lip and palate associated transmembrane protein 1	-0.425731	-2.43032	6.55073	-0.442648	-0.096789	58.0134	-0.246729	-1.19515	48.2574	NA	NA	NA	AAAGCCAGCAGAGGACAAGAAAAAGGATTAGCCACTGCAGTCCTCCTTATCTGCTCCTGGTGACTGACCA
Rpl37			NM_026069	ribosomal protein L37	-0.910628	-2.42882	6.57481	-0.140225	0.0226755	58.5214	-0.50828	-1.19666	48.1652	0.178648	0.195261	81.5643	ATAACTGGAGTGCCAAGGCTAAGAGACGAAACACTACCGGGACTGGTCGGATGAGGCACCTAAAGATTGT
Ticam1			NM_174989	expressed sequence AW046014	-0.456795	-2.42724	6.60007	0.450251	0.26145	35.626	-0.201038	-0.826304	70.5621	NA	NA	NA	GGGAGGATGCGGTCCCGGGGCACATAGGGAGGGTCCTGTTTTTATAATAAAGTTATTGACAACTGAGTCA
Tmem66			NM_026432	Mus musculus RIKEN cDNA 1810045K07 gene (1810045K07Rik), mRNA.	-0.395313	-2.42171	6.68913	0.373898	0.223616	40.2627	-0.357887	-2.13066	9.95317	0.573182	0.831725	24.3793	CGGTTGTGAGGCCTATACCCCCAGGGTGATACAGTGCCAGAACAAAGGCTGGGATGGCTACGATGTACAG
Dusp11			NM_028099	dual specificity phosphatase 11 (RNA/RNP complex 1-interacting)	-0.325268	-2.42097	6.70101	0.838277	0.401038	19.513	-0.383193	-2.53889	4.3529	0.214184	0.266324	77.2374	GGATCGACAGGTCTCGCTTCCCTCTGTTGCTGAGTTGCTCTTGTATATGGTTGTCTCACACTTTGCTTAA
Ugt1a7c	Ugt1a10		NM_201643	UDP glycosyltransferase 1 family, polypeptide A10	-0.333491	-2.41828	6.74456	-0.27676	-0.0294239	59.6235	-0.214151	-1.3603	38.5151	0.00922053	-0.0968818	81.7965	TGACGGCTTTCTCCCCTGGATTCTCAGACTGCCGTGGCCTTCTCCAGTGTTAGTCATTCTTCATTGTGTT
Utp3	Crlz1		NM_023054	charged amino acid rich leucine zipper 1	-0.46121	-2.41496	6.79847	-1.39047	-0.456896	19.4894	-0.210989	-1.03233	58.3066	-0.136994	-0.403215	56.5573	CAGGCAAGAGTTGAAGAGAAAGAAGGAAGAAAACAGTGCTGAAGAACAGGCTCTCGAAGAACAAAATGCA
Hnrnpd	Hnrpd		NM_007516	heterogeneous nuclear ribonucleoprotein D	-0.445737	-2.41141	6.85633	-1.1473	-0.355462	31.1292	-0.175884	-0.598969	81.991	-0.258565	-0.496018	47.0444	GAGTTCTCATTAAAAGAATTTGCTTTCATTGTTTTATTTCTTAATTGCTATGCTTCAGTATCAATTTGTG
Nsdhl		1	NM_010941	NAD(P) dependent steroid dehydrogenase-like	-0.419085	-2.40749	6.92057	0.261242	0.180763	45.3411	-0.177239	-0.925082	64.8237	0.137733	0.139333	83.879	CGAAACCATACTTTGAGCCATAATGGAACAAGCTGTTCATGGTGAATCAAAGCGAGGCCAGGTCACAGGA
Rps16			NM_013647	ribosomal protein S16	-0.888279	-2.4036	6.98457	-0.129212	0.0274857	58.321	-0.456762	-1.18701	48.7557	0.1411	0.138536	83.9046	GGCTGTGGCCCACTGCAAACGGGGAAATGGGCTCATCAAGGTGAACGGACGTCCCCTGGAGATGATCGAG
9530058B02Rik			NM_026633	RIKEN cDNA 9530058B02 gene	-0.663195	-2.40349	6.98633	-4.37564	-1.62336	0	-0.00908992	0.630308	64.3994	NA	NA	NA	TAAAATCACCAACTGTTCCTAGCAGCTGTCCGGGAAGGAATGTTGCCATAGTGGACCCTTTGCCAGAAGA
Pold4			NM_027196	polymerase (DNA-directed), delta 4	-0.422146	-2.40251	7.00244	0.165316	0.145232	49.2447	-0.155452	-0.338281	89.7462	1.11222	1.9002	0.791137	TAATCATGACCACCAGATGCCCACCCGCCACACCCCTGACCTACGGTGTGGCAAATCCAGCACAGGCTGG
Ascc2		1	NM_029291	activating signal cointegrator 1 complex subunit 2	-0.48273	-2.39997	7.04442	-0.70251	-0.197459	50.1022	NA	NA	NA	0.498588	0.501253	55.6099	AGTCCTGGATGGCAGGAGACCTGTATATTCAGAAGCAACGAAAGGCCCATGAATAAAGTTTCTGACCCTC
Asns			NM_012055	Mus musculus asparagine synthetase (Asns), mRNA.	-0.53787	-2.39951	7.05218	-1.98208	-0.673007	3.41136	-0.390998	-1.71252	21.8105	-1.21479	-2.06995	1.89226	GCAGCCGATAAGAGTGAGGAAATACCCTTATTTGTGGCTCTGTTACAATGGTGAAATCTACAACCACAAG
Rps3			NM_012052	ribosomal protein S3	-0.817905	-2.39887	7.06265	-0.169829	0.0118039	58.9151	-0.420057	-1.17061	49.7615	-0.130888	-0.401016	56.7819	GTCCGAGTTACACCAACCAGGACAGAAATCATTATTTTAGCCACCAGGACACAGAATGTTCTTGGGGAGA
Dhrs4			NM_030686	dehydrogenase/reductase (SDR family) member 4	-0.247894	-2.39838	7.07085	-0.338845	-0.0558613	59.397	-0.31778	-1.0096	59.7039	-0.25597	-0.67334	30.2161	ATTAATGTGACAGCTACAGCCATGATGATTAAAGCGGTGGTGCCAGAGATGGAAAAGCGAGGAGGCGGCT
Pnpt1			NM_027869	polyribonucleotide nucleotidyltransferase 1	-0.394421	-2.39759	7.08393	-1.84106	-0.633316	5.41567	-0.173606	-0.60335	81.8036	NA	NA	NA	AGTATAATTATTTGTATTAAAATGATCATGTGCCTTTTTTATTTCAGGAGCAACCTATATTTGCTTATTC
bsid(852051)	1110014N23Rik		XM_283543	RIKEN cDNA 1110014N23 gene	-0.361026	-2.39724	7.08982	0.326148	0.20898	42.029	-0.260463	-1.38406	37.1901	0.197697	0.256095	77.9481	TTCTCATCCTAGAGGCCCTTCCCCGCTGGCGGGTTCATGGATCCTTCTAATAAACTTATGTGTCCTCCTC
Stx18			NM_026959	syntaxin 18	-0.290772	-2.39458	7.13403	0.0648525	0.107166	52.9433	-0.116408	-0.407314	88.4098	-0.0282836	-0.209546	74.5959	TGAATCACAGCCCGAACTGGGAACCTGGGGCGATGGCAAGGGTGAAGATGAGCTGTCTCCAGAAGAGATA
Car2			NM_009801	carbonic anhydrase 2	-0.32526	-2.39311	7.15848	-1.97335	-0.678659	3.15771	-0.133817	-0.376273	89.0784	NA	NA	NA	GGTAAAACAGTCATAGTTTTGTGATTATAAATGAGATGAATGTTCACCCTTCCAAGATCTTATATTAAAG
Tmem66			NM_026432	RIKEN cDNA 1810045K07 gene	-0.371533	-2.39226	7.17269	0.341401	0.194855	43.7054	-0.354546	-1.99468	13.0163	0.49569	0.560686	49.4325	GTGGCTTTGGACCATGAGTCATTCCCTCGTAGAAACAACGATCCTCTATTGGATATTAAAACACTTGGTG
Eif1	Sui1-rs1		NM_011508	suppressor of initiator codon mutations, related sequence 1 (S. cerevisiae)	-0.413537	-2.38929	7.22239	-0.670366	-0.175639	52.2733	-0.0959465	-0.107425	90.2183	-0.447003	-0.599356	36.8853	AACCTCACAGCTTGTATAATGTAATCATTTGGGGTCCGCTTTTAACTTGGACTAGTGTAACTCCTTCATG
Epsti1		2	NM_029495	Mus musculus RIKEN cDNA 2310046K10 gene (2310046K10Rik), transcript variant a, mRNA.	-0.40343	-2.38854	7.23491	NA	NA	NA	NA	NA	NA	NA	NA	NA	CCTTTTGAAGAGACGTTTAGGGACTGAAGATTAAGTATACGAAGTGACAGACATAGCACAGAATCATCTG
bsid(891889)	Ascc1		XM_483908	activating signal cointegrator 1 complex subunit 1	-0.404876	-2.38854	7.23493	0.60465	0.323985	28.0539	-0.330839	-2.57297	4.07559	NA	NA	NA	TTCATTCCTTACCCTCCACCCTCCTTTCTGTGACTCTGCTCCTGAGCTCTGTGGTGTGGCCGACCACTGT
Rpl17			NM_001002239	ribosomal protein L17	-0.935402	-2.38522	7.29073	0.155809	0.138129	49.978	-0.560699	-1.49002	31.6025	0.259707	0.395995	66.2317	CACATTGAGATGATCCTCACTGAGAAGGAACAGATCGTTCCAAAGCCAGAAGAGGAGGTTGCACAGAAGA
Ppan			NM_145610	peter pan homolog (Drosophila)	-0.403053	-2.38097	7.36241	-3.12601	-1.16664	0	-0.0817082	-0.0247545	89.008	-0.425349	-0.975594	10.5454	CCTGGGATCCAGTGCAGTCCGGTTTCCTTTTATAAAGGAACTGCCCAGTTCTTAACCTCCAATAAACCTG
Dnajc18			NM_029669	RIKEN cDNA 2700075B01 gene	-0.408558	-2.38076	7.36595	0.0824226	0.112625	52.4504	-0.237392	-1.01308	59.4902	0.17766	0.150392	83.5019	CTGGCTGAGTGCCCTGCACATTTTAGTGTGAGATAGTGATGTGACCTTTCACCCATTCAATATTTATGAA
Rps25			NM_024266	ribosomal protein S25	-0.967665	-2.37928	7.39097	-1.33689	-0.35527	31.1528	-0.183399	-0.153588	90.5994	-0.849937	-0.778153	21.9484	ACAAAGCGACATACGACAAGCTCTGTAAGGAGGTTCCGAACTATAAGCTTATTACTCCAGCCGTGGTCTC
Plaa			NM_172695	phospholipase A2, activating protein	-0.346844	-2.37443	7.47339	-0.411183	-0.0795826	58.7415	-0.0821481	-0.0590974	89.5896	-0.0725745	-0.237387	72.3436	GAGCCAGCTAAAGTGAGTGAATGCTGTAGACTTGTCTTACATTTGCTGTAGCAGTGGGGAAAAGACGCTG
Phka2			NM_172783	phosphorylase kinase alpha 2	-0.341933	-2.37442	7.47349	0.534924	0.289591	32.1817	-0.164353	-0.697044	77.4456	0.424053	0.688049	36.7307	ATACCGAAATGGACAGTATCGGGGGCATCATCCATGTGGACCAGATAGTGCAGCTGGCCAATCAGCTGTT
Pecr			NM_023523	peroxisomal trans-2-enoyl-CoA reductase	-0.377118	-2.37426	7.47633	-2.48071	-0.890031	0	-0.111252	-0.453995	87.1984	-0.28022	-0.717975	26.5116	GGGGGGTGGGGGATCACTTTAATGTTAATAGCTTTATCTTTGCAAAGACTGCTCCCAAAATAAATGTCTC
Thg1l			XM_126359	RIKEN cDNA 5730409G07 gene	-0.628297	-2.36944	7.55858	-1.48934	-0.507332	14.5804	-0.260694	-0.853703	69.0044	-0.203026	-0.460183	50.7087	GCTCTGCAGTTCTAGCATGCTTAATCACACAAGGCTCCCCGAGTCTCCCCCTAACCCTAGGTGGTTCAAG
2410019A14Rik			mSQ021248	RIKEN cDNA 2410019A14 gene	-0.284793	-2.36928	7.5613	-2.28385	-0.815199	0	-0.155771	-1.16931	49.8414	NA	NA	NA	GTACCAGATGATAAAACTATTAATGAAATTCTAAAGCCTTACATCGATCCTGAAGAGTCTGACCCTGTGA
Ugt1a7c	Ugt1a1		NM_201643	UDP-glucuronosyltransferase 1 family, member 1	-0.33852	-2.36634	7.61176	-0.132098	0.0266103	58.3587	-0.233065	-1.20408	47.7125	0.105701	0.0652892	85.3211	TGACGGCTTTCTCCCCTGGATTCTCAGACTGCCGTGGCCTTCTCCAGTGTTAGTCATTCTTCATTGTGTT
Hspb8			NM_030704	heat shock 27kDa protein 8	-0.325804	-2.36505	7.63392	-2.46423	-0.893505	0	-0.149611	-0.605354	81.7173	NA	NA	NA	TGAGGGGTGGGGAGGATGTGTGTGTCTTTGTTGTGTGAATTGTGCTGTTGTTTAGAGGGAAAATAACGGT
Gtf2h4			NM_010364	general transcription factor II H, polypeptide 4	-0.340694	-2.36378	7.65591	-1.65327	-0.548661	11.0845	-0.170395	-1.50876	30.6739	-0.406307	-0.720913	26.2771	CCGGGCGGGCAGCTTTCCAACTCAGATGTATTTTGTTTACACACCGGGATATTTCTTGTTTAATAAAATT
Napsa			NM_008437	napsin A aspartic peptidase	-0.382698	-2.36193	7.68781	-0.318831	-0.0458032	59.5472	-0.149334	-0.428402	87.893	0.742304	1.10899	8.65753	ACTTCATTCAGTGTTCCAAGACGCCAACGCTTCCCCCTGTCTCCTTCCACCTTGGTGGAGTCTGGTTTAA
Ssr4			NM_009279	signal sequence receptor, delta	-0.777959	-2.36022	7.71733	-0.868152	-0.226089	46.9788	-0.325577	-0.740651	75.2197	-0.457468	-0.524114	44.2089	CTGAGGGCAGCAACTTCAGCCGTCCATTGCTTCTTTCAATAAACAGTCACTATTTGACATGAGTACATTC
Ssr4			NM_009279	signal sequence receptor, delta	-0.847792	-2.35915	7.73593	-0.36739	-0.0630899	59.2414	-0.368075	-0.841745	69.6878	0.231418	0.274597	76.6428	CCAGGCCTGAGGCGAGCAACTTCAGCCGTCCATTGCTTCTTTCAATAAACAGTCACTATTTGACATGAGT
Eif3c	Eif3s8		NM_146200	eukaryotic translation initiation factor 3, subunit 8	-0.599255	-2.35859	7.74559	-0.922721	-0.268372	41.9668	-0.342271	-1.26353	44.1289	NA	NA	NA	ACCACTGAGGAGATCTGCCAGATCTACTTAAGGCGCATCCTGCACACGTACTACAAGTTTGACTACAAGG
Rusc1			NM_028188	RUN and SH3 domain containing 1	-0.394785	-2.3516	7.86727	-0.587729	-0.150879	54.4648	-0.295021	-1.48209	32.0008	-0.0464168	-0.206592	74.8253	CTTACCATGCCAGGGGCACTTGTCCTTCTGCAAACCCACATTTCTTCCCATATCTATTTCTGTGGACAGT
Eef2			NM_007907	eukaryotic translation elongation factor 2	-0.646788	-2.35084	7.88046	0.167884	0.135175	50.2777	-0.301821	-0.55015	83.9681	1.32639	0.824062	24.9689	TGGGAAAAAACTTCCCCGCACCTTCTGCCAGCTCATCCTGGACCCCATCTTCAAGGTGTTCGACGCCATC
Pstpip1			NM_011193	proline-serine-threonine phosphatase-interacting protein 1	-0.352104	-2.35013	7.89289	-0.470101	-0.107969	57.432	-0.187641	-0.809086	71.5254	0.533918	0.942149	16.8129	TGGGTCGTACTTGGAGAAGCTCTGAGGAAAGGCTAGCAGTCTCCACATACCTCCGCCCTGACTGTGAGGT
Snrpa			NM_015782	small nuclear ribonucleoprotein polypeptide A	-0.302266	-2.34926	7.90814	NA	NA	NA	-0.0470178	0.165484	84.0105	NA	NA	NA	TTTGCCCGCCGTGATTAGCTCGCGGAAGGGAGAAGCCGTTGCCGGGGAAGATAGTTGTGTGTCTGTGCAG
Alg8			NM_199035	Mus musculus asparagine-linked glycosylation 8 homolog (yeast, alpha-1,3-glucosyltransferase) (Alg8), mRNA.	-0.377011	-2.3472	7.94416	-1.68287	-0.571478	9.36242	-0.224305	-1.73634	20.9208	0.039566	-0.0617555	83.2997	TGACCCCAGCCAGATCCCCAGGGCCTCAATGACAAGTGGTTTGGTTCAGCAGTTCCAGCACACAGTCCTT
Ppia			NM_008907	Mus musculus peptidylprolyl isomerase A (Ppia), mRNA.	-0.572343	-2.34567	7.97108	-0.698623	-0.159618	53.7276	-0.291812	-1.0991	54.179	-0.812331	-0.78	21.8163	GAGAGAAATTTGAGGATGAGAACTTCATCCTAAAGCATACAGGTCCTGGCATCTTGTCCATGGCAAATGC
Gcs1			NM_020619	glucosidase 1	-0.390711	-2.34567	7.97113	-3.21813	-1.20504	0	-0.300947	-1.43199	34.5944	-0.347044	-0.777453	21.9985	GAGTACTAATGGGACAGAAGGAAAGCTAGGCCATTTGTGTCACTTGGAATATGCAGACAAGGGCTTGGGT
Sult1d1			NM_016771	sulfotransferase family 1D, member 1	-0.282759	-2.34517	7.97988	NA	NA	NA	-0.403403	-2.53184	4.41315	NA	NA	NA	TTTATTGGGTTTTGGATCACACCAGGGTCATTTTCATCCTCCTGAAATTAATCATTCCTGAGTGAGATAA
Slc2a6			NM_172659	solute carrier family 2 (facilitated glucose transporter), member 6	-0.338597	-2.34478	7.98679	0.65635	0.33828	26.3823	-0.230858	-1.20108	47.8956	1.03051	1.91387	0.810009	ACCCAGTCCAAACCTTGGATACCTCTAGTCTGCCAACTGTTCACTGTTTTTCAAAATAAAGAGCTGGGCC
0610037D15Rik			NM_026714	RIKEN cDNA 0610037D15 gene	-0.472894	-2.34271	8.02323	0.530241	0.293291	31.7321	-0.329994	-1.77473	19.5484	0.131348	0.12837	84.2123	TGACCAGATGGACAGGGTTCATACCTTGGAGGTTTCCAGTACAGAGGCCCATGATGCCCAGAAGGAAGAG
Pdia4	Cai		NM_009787	calcium binding protein, intestinal	-0.484614	-2.34236	8.02938	-1.22225	-0.41019	24.5962	-0.38517	-1.55626	28.406	-0.0462106	-0.219089	73.8419	AAGCAGCTAGAGCCTATCTATACCAGCCTAGGCAAGAAATACAAGGGCCAGAAGGACCTGGTCATCGCCA
bsid(990777)	BC026590		XM_485382	cDNA sequence BC026590	-0.382874	-2.34166	8.04182	-1.68355	-0.570125	9.46042	-0.121242	-0.317961	90.0347	0.047553	-0.037694	84.1041	TGTGTGCTGGGAAGCGCACTTGTGGGTGTTCACTTGCGTATACGTCAGAAAACAACTTCAAGTGCTTTTT
Atic			NM_026195	Mus musculus 5-aminoimidazole-4-carboxamide ribonucleotide formyltransferase/IMP cyclohydrolase (Atic), mRNA.	-0.434908	-2.34105	8.05248	-3.32644	-1.19547	0	-0.00578029	0.4452	72.8118	-0.129128	-0.235996	72.4598	TTAAAGCCGGGGTGAAGAGAGCAGAGATCTCCAATGCGATTGATCAGTATGTGACCGGCACTATCGGTGA
Dym			NM_027727	RIKEN cDNA 4933427L07 gene	-0.358581	-2.33992	8.07248	-0.00119355	0.0765696	55.4334	-0.229986	-1.28487	42.8648	NA	NA	NA	TCAAACAAGCGTGCTTCCCTCACACACTGTGACTATTGGGAGACTGCGCCAGTTAGCAGTAGTTCACTCA
Ms4a4b			NM_021718	membrane-spanning 4-domains, subfamily A, member 4B	-0.316636	-2.33979	8.07472	NA	NA	NA	-0.0877022	-0.116497	90.3105	NA	NA	NA	GGCTTTTGAGGTGAATATTAGATTTACTGTAAGTATGTAAGTCAAGCACTTATTAGGTCAACAACACTTC
Rpl38		3	NM_023372	ribosomal protein L38	-0.811861	-2.3392	8.08532	-0.947069	-0.254349	43.6683	-0.316442	-0.638507	80.2439	-0.3643	-0.471645	49.5327	ATCAAGAAGAACAAGGATAATGTGAAGTTCAAGGTTCGCTGCAGCAGGTACCTTTACACCCTGGTTATCA
Abhd14a	Dorz1		NM_145919	downregulated in Zic1 deficient cerebellum	-0.520305	-2.33867	8.09458	-1.85257	-0.66448	3.80866	-0.10559	0.0308097	87.8446	-0.0379499	-0.210228	74.5427	ATGATGCAGGTCATGCCTGCTACCTCCACAAGCCAGAAGCCTTCCACCTCGCCCTTCTTGCCTTCCTTGA
Pcdhgc3			NM_033595	protocadherin gamma subfamily A, 6	-0.440359	-2.33845	8.09855	NA	NA	NA	-0.224576	-1.02265	58.9025	0.184626	0.162532	83.0417	TTACAGTAGTGTAGAAGATCCCCCTCCCCCGCTGGTGTAGAATAGCCAATAGTATAGTGTGGTGTGCTTT
Pcdhgc3			NM_033595	protocadherin gamma subfamily A, 12	-0.458959	-2.33645	8.13396	-0.499789	-0.111973	57.2037	-0.221751	-0.824455	70.6661	0.103346	0.0478402	85.3776	TTACAGTAGTGTAGAAGATCCCCCTCCCCCGCTGGTGTAGAATAGCCAATAGTATAGTGTGGTGTGCTTT
Adh5			NM_007410	alcohol dehydrogenase 5 (class III), chi polypeptide	-0.58027	-2.33642	8.13455	-1.73012	-0.568036	9.61277	-0.34021	-1.31335	41.199	-0.691884	-1.13751	4.96129	CCCACTCTACATCCCACAGTGTGGAGAATGCAAGTTTTGTCTGAATCCTAAAACAAACCTTTGCCAGAAA
Grsf1			NM_178700	G-rich RNA sequence binding factor 1	-0.368892	-2.33614	8.13943	-0.535152	-0.129942	56.0532	-0.158986	-0.558262	83.6542	0.63732	0.525002	53.1405	CTTGAATTGAACCAGCTCTAGATAGGGAAAACAATCTAAGTCCCCTCGTTTGCTTTTCCAGTGGGGTAGC
Clic1			NM_033444	chloride intracellular channel 1	-0.315287	-2.33583	8.14502	0.130676	0.120581	51.7082	-0.02792	0.255519	80.781	1.37319	0.979526	14.6506	CCCGGGAAGAATTTGCCTCCACCTGTCCAGATGATGAAGAGATAGAGCTAGCCTATGAGCAAGTGGCCAG
bsid(984582)	6430559E15Rik		XM_131537	RIKEN cDNA 6430559E15 gene	-0.456964	-2.33277	8.19947	-0.31744	-0.0469247	59.5343	-0.183105	-0.709513	76.8205	0.613179	1.0905	9.37886	TTTACTTACCTGTTTCAGCTGCTAGAAGATGAGGGCTACCAAGGATTTGTGGGTTGCGAGTATCGGCCTC
Jtv1			NM_146165	JTV1 gene	-0.259324	-2.33249	8.20446	-2.80431	-0.968671	0	-0.104327	-0.5362	84.4936	-0.612364	-1.01746	8.80429	AGAATGTGCCCGAGAATCTTGTCAAGTGCTTCGGGGAGCAGGCTAGGAAGCAGTCCCGCCACGAGTATCA
Cd79b		1	NM_008339	CD79B antigen	-0.323169	-2.33226	8.20857	1.62253	0.71466	0.180259	-0.138532	-0.626165	80.8025	1.378	2.19711	1.16699	ACATGGAGTAAGGAGTTCTCTGGGGATAGACTTGACCCAAGGCTTCTGGGAGTGCCATGTGGGATCTGTC
D130019J16Rik			mSQ007322	RIKEN cDNA D130019J16 gene	-1.28542	-2.32772	8.28973	-0.531809	-0.119935	56.719	NA	NA	NA	-0.743884	-1.15427	4.54783	GTGCTTGGTTTGATATGAGACATAATTCTTTAAATTTATAGTGGAATCTTTCCCTGGTCGTAAATAACAG
Mosc2			NM_133684	RIKEN cDNA 2810484M10 gene	-0.233366	-2.32763	8.29126	-0.0405981	0.0618679	56.4511	-0.211721	-1.93774	14.5072	0.375687	0.580131	47.426	TCACCCTGGAGAACAATTACCTGACGCTGGAAGCTCCAGGCATGGAGCAGATAGTTCTGCCAATCAAGCT
0610038D11Rik		1	NM_026306	RIKEN cDNA 0610038D11 gene	-0.501031	-2.3273	8.29728	NA	NA	NA	-0.303315	-1.38082	37.3694	NA	NA	NA	CATCAACCCCGTGGAGTTCAACCCGGAGTTCGTGGCGCGGATGATCCCCAAAGTGGAGTGGGCGGAGATT
Sirt5			NM_178848	sirtuin 5 (silent mating type information regulation 2 homolog) 5 (S. cerevisiae)	-0.326461	-2.3269	8.30445	0.141056	0.128912	50.902	-0.204203	-1.15611	50.6539	0.544356	0.616583	43.7162	CCTGCAGTACGGTATCCTGGAGTGCTAAAGCAGGGCACTAACGGGAAAAATGGCTTTATGGATGGTGAGC
Atp6v1h			NM_133826	ATPase, H+ transporting, lysosomal 50/57kDa, V1 subunit H	-0.448118	-2.32417	8.35348	-0.627612	-0.159821	53.71	-0.342238	-1.45283	33.5004	-0.417044	-0.753733	23.7394	GTATAAAATTAGATACTGCCTGTATTAGAGAAATATTACTGTTACTTATATTCTTTATGATTTTTGTATT
Luc7l		2	mSQ008341	Mus musculus Luc7 homolog (S. cerevisiae)-like (Luc7l), mRNA.	-0.472491	-2.32219	8.38901	-1.51848	-0.51631	13.7798	-0.193749	-0.767169	73.8153	0.207453	0.213108	80.6174	CTGGCGAGATCTGAATCTGGCTCAGGCGCTGTAAATAGTCTGACAAATGTTCGGCACCGCCTAAATTACC
Snx5			NM_024225	sorting nexin 5	-0.449893	-2.31959	8.43597	0.310765	0.186501	44.6801	-0.274041	-1.16388	50.1757	0.443664	0.544917	51.0687	TGCTTGTACGGTAACAAGCAAGAAGATCTCATATGTCTTTTTACATCCTTTACAGCTCCATTTTTGTAAC
Ergic3	Sdbcag84		NM_025516	serologically defined breast cancer antigen 84	-0.430544	-2.31919	8.44327	0.124772	0.13012	50.7828	-0.25012	-1.41471	35.5181	0.292857	0.458901	59.9742	AGGGCCTGCCGGGGGTCTTTGTGCTGTATGAGCTCTCACCAATGATGGTGAAGCTGACGGAGAAACACAG
Rpn2			NM_019642	ribophorin II	-0.404699	-2.31593	8.50224	-1.63937	-0.584914	8.41657	-0.294869	-1.40456	36.0668	NA	NA	NA	CTGTCCCTTTGTCTTGATGCCTGGCAAGATGCTGTGAATATCCCAGGCTACCCAGATGTTGTATTTGAAA
Slc30a7			NM_023214	solute carrier family 30 (zinc transporter), member 7	-0.31862	-2.31591	8.50274	-0.997351	-0.314514	36.2293	-0.17558	-0.795451	72.2791	0.00874436	-0.118509	80.6847	TACAACTCAGAAGCACCAAGGACGCAGGTAGAGTCAGCCGCGTGTTCGAGCGGTGTCACAGCCGGATCCT
Rxfp1	Lgr7		NM_212452	leucine-rich repeat-containing G protein-coupled receptor 7	-0.443106	-2.31588	8.50328	-3.99072	-1.47299	0	-0.148231	-0.442966	87.5068	-0.519636	-1.11524	5.55463	CTCGCCAAACGCTTTTTCTTTATCGTTTTCACCGACGCGCTGTGCTGGATTCCCATCTTCATACTGAAAT
Ctsh			NM_007801	cathepsin H	-0.653434	-2.31358	8.545	-0.120178	0.0317781	58.1291	-0.179889	-0.357929	89.4216	1.14312	2.16359	1.13573	AAGGACAAACTTGAATAGCGACAAGCCCACCCACGTGACATCATCACCAGAAATACGCTTGGATTGTGGT
Gstp1			NM_013541	glutathione S-transferase, pi 1	-0.301637	-2.30954	8.61863	-1.26819	-0.350561	31.7341	-0.0466937	0.104901	85.8999	0.0719676	0.00278286	85.0236	GATGGATATGGTGAATGATGGGGTGGAGGACCTTCGCGGCAAATATGTCACCCTCATCTACACCAACTAT
1700022C02Rik::Cenpp			mSQ003466	RIKEN cDNA 1700022C02 gene	-0.286617	-2.30941	8.62093	0.47146	0.267488	34.8843	-0.332095	-2.80278	2.7229	0.0433672	-0.0487683	83.7572	TGCTCCTCTCAGTTTCCGAAGCCTGCTAGGTGTACTTGGTATTGAAGCTGCTCTAGACAGCCTGATAAGA
Dap3			mSQ026852	death associated protein 3	-0.278156	-2.30907	8.62728	-0.401831	-0.0779843	58.7986	-0.145607	-0.71058	76.7665	0.269724	0.382711	67.4978	GGAAGTCCCAAGGTTCCAAGCTGAACACCCTGACCTGCACTGATGGATATGAAATGATAGGATGTTGTTG
Klf1			NM_010635	Kruppel-like factor 1 (erythroid)	-0.561877	-2.30832	8.64096	0.712671	0.35831	24.0993	NA	NA	NA	NA	NA	NA	ACCCTGTGTCCTGGACGCAGATGGACTGGGGTGAGATTTCCTAAGATCTAGAAGGGAGCTTCACACTGTG
Rnh1			NM_145135	ribonuclease/angiogenin inhibitor 1	-0.377651	-2.30707	8.66383	-0.173482	0.0107682	58.9483	-0.285811	-1.23936	45.5759	NA	NA	NA	GGGTGTCCTTGTGTTGACCGGCAATAAGCACTGTGGTCTTACTTCAGTAGAAAACTTTAAGACACTTTAT
Tsr1			mSQ009739	expressed sequence AW550801	-0.313316	-2.30705	8.66422	-3.86604	-1.37143	0	-0.193439	-1.08905	54.8015	-0.418568	-0.713218	26.8937	CACAGAAAGGAGCAAGGGTTAATGAAACAAGAAACGGAGCCGGAGTCTAGTAGGTTACATTCGAAAAATG
Fkbpl			NM_019873	FK506 binding protein-like	-0.328894	-2.30625	8.6789	0.7941	0.387008	20.9728	-0.179051	-0.730378	75.7538	0.248831	0.321192	72.99	CATAGGACAATGGAGGGAAAAAATGTGGGGGGAACTCATGGAAAAATGCCTGGAGTCTATGCGTCAAGGT
Elac2			NM_023479	elaC homolog 2 (E. coli)	-0.549215	-2.30392	8.72153	-2.04343	-0.724123	1.38392	-0.192555	-0.754302	74.5012	-0.523857	-0.95446	11.5094	GTTGTGACTGCCCCGCAGCCTTCACCGAAACAAGACCATGTGCCAAGCTCAGGGTTAATAAATCTATTTT
Pabpc4		2	NM_130881	Mus musculus poly A binding protein, cytoplasmic 4 (Pabpc4), transcript variant 1, mRNA.	-0.523633	-2.2959	8.86964	-0.391566	-0.0719357	58.998	-0.430061	-1.97906	13.4127	NA	NA	NA	CGCTTGGCTATGGACTTTGGTGGGGCTGGTGCCGCCCAGCAAGGGCTGACTGACAGCTGCCAGTCTGGAG
Pcdhgc3			NM_033595	protocadherin gamma subfamily B, 2	-0.450968	-2.29323	8.91906	-0.501902	-0.115386	57.0009	-0.198942	-0.77096	73.6116	0.112527	0.0742084	85.2501	TTACAGTAGTGTAGAAGATCCCCCTCCCCCGCTGGTGTAGAATAGCCAATAGTATAGTGTGGTGTGCTTT
Rps15			NM_009091	ribosomal protein S15	-0.805655	-2.29288	8.92568	-0.274341	-0.0287961	59.6223	-0.372131	-0.925868	64.7768	0.501644	0.686019	36.9226	GAAAGGCCAAAAAGGAGGCACCACCCATGGAGAAGCCTGAGGTGGTGAAGACTCACCTGAGGGACATGAT
Dnajb12		3	NM_019965	DnaJ (Hsp40) homolog, subfamily B, member 12	-0.403428	-2.29153	8.9508	0.136511	0.132983	50.4979	-0.199943	-0.83585	70.0227	0.482588	0.713216	34.3863	TCCCAGGGCAGGCAAGAAGCTCCGCATCACTGGCTCCTAGGATACCGAAACCATGGCAACGAAAGTAGAA
Pxmp4			NM_021534	peroxisomal membrane protein 4	-0.279716	-2.29021	8.97525	1.0283	0.469627	13.0973	-0.247785	-1.91357	15.1799	NA	NA	NA	CTCCAACTTGTATTAACCCAGGCTCCCATTTGCTGAAGTAAAAGTACTGAGTTTTCCACTTACCAGTACT
bsid(862805)	IGKV8-19		Y15980	Mus musculus V kappa 8-19 gene, partial.	-0.302469	-2.28671	9.04071	0.28657	0.190614	44.2019	NA	NA	NA	-0.0218925	-0.150058	78.8202	CAGACTCAGGTCCTCATGTCCCTGCTGTTCTGGGTATCTGGTACCTGTGGGGACATTGTGATGACACAGT
Prmt5	Skb1	4	NM_013768	SKB1 homolog (S. pombe)	-0.272234	-2.28557	9.06195	-2.2811	-0.83199	0	-0.174053	-1.11724	53.0558	-0.286222	-0.734159	25.235	GAAGGCTGTGGAAGAGCCCGGGCTGCGTGCATGAACACTTGACCTGCGCTCTTCTTGCCCTACTCTGTTG
Anp32b			NM_130889	acidic nuclear phosphoprotein 32 family, member B	-0.494821	-2.28517	9.06941	-0.83361	-0.249409	44.2596	-0.138146	-0.362871	89.333	NA	NA	NA	TGTAACAACATTTTTACTTTCTGTACAACAAGGAAAAGCTTTGTAAATAAAATCTTAACATTTTGAAAAA
Gpr56			NM_018882	G protein-coupled receptor 56	-0.337906	-2.28235	9.1224	-0.637555	-0.155152	54.1095	-0.275474	-1.59765	26.5297	-0.34407	-0.57686	39.0253	CTTTTTAAATACCAGTTCATTTGTCTTTTGATATTAAAGCTCTTTATAGAGAGTCTGGAAACTGTAGGCG
Hyou1			NM_021395	hypoxia up-regulated 1	-0.410366	-2.27418	9.27659	-2.05256	-0.712946	1.77764	-0.407669	-1.69279	22.57	-0.379434	-0.767616	22.711	ACGGAGAGACCATGGAGTGAATGTAAAAATGCCACCTCACTCTCAGGCAAGCTTTGTGGGTAAAGACGAG
Pcdhgc3			NM_033595	protocadherin gamma subfamily B, 8	-0.491126	-2.26922	9.37062	-0.48699	-0.107043	57.4833	-0.277787	-1.13499	51.958	0.177479	0.157341	83.2444	TTACAGTAGTGTAGAAGATCCCCCTCCCCCGCTGGTGTAGAATAGCCAATAGTATAGTGTGGTGTGCTTT
Mrps35			NM_145573	mitochondrial ribosomal protein S35	-0.402104	-2.26756	9.40233	-1.46477	-0.446246	20.6098	-0.1754	-0.735458	75.4904	-0.852795	-1.11952	5.43665	AAGACTGGGAAAACAGTAAGACCGAGGAAGACATGGACGAGTATGTGTGGGCAAAGAGCTCCTCGGAGAA
Eftud2	Snrp116		NM_011431	Mus musculus U5 small nuclear ribonucleoprotein (Snrp116), mRNA.	-0.366996	-2.26609	9.43044	-1.65301	-0.544143	11.443	-0.172315	-0.551516	83.9157	-0.126376	-0.282539	68.3831	AGGCTCCCCTCTCTATACCATCAAAGCGTTCATCCCGGCCATCGACTCATTCGGCTTTGAGACTGATCTC
Bcap31			NM_012060	B-cell receptor-associated protein 31	-0.273351	-2.26603	9.43152	-0.850951	-0.244455	44.8479	-0.0332297	0.304145	78.863	0.117814	0.0815853	85.1697	AATGAAGTTAGAGGAGAACAAGAGCCTGAAGAATGACCTGAGGAAGCTAAAAGATGAGCTGGCCAGCACC
Gpr177			NM_026582	RIKEN cDNA 5031439A09 gene	-0.36806	-2.25686	9.60754	-0.31259	-0.0450913	59.5548	-0.248484	-1.29174	42.4605	0.3191	0.530077	52.6123	AACCTACATGGCAAACCCCATCCTGTGTTTTTCCTAACTTTGGCCAGAACCATGGTAAACAGTGACAGAG
Dus2l			XM_134309	RIKEN cDNA 2310016K04 gene	-0.403398	-2.25665	9.61154	0.537595	0.293388	31.7203	-0.204191	-1.40112	36.2541	-0.101923	-0.365709	60.3583	GATATGCAAGAAGCCATTTGTAACCTTGGACAGTAGTGAGGAGAATCTTCTGGAAGGCTGCTGACTCCTG
Rpl31			NM_053257	ribosomal protein L31	-0.905337	-2.25587	9.62666	-0.0622859	0.0546373	56.9055	-0.482772	-1.16572	50.0622	0.301735	0.459332	59.9303	ACATCAACTCTGCCTTTCCAGCCATCTTTGCCAACCAGTAGCTCATCTCTGGGATGTGTCTGCCCTCAAA
Rasl2-9			NM_009028	RAS-like, family 2, locus 9	-0.412503	-2.25124	9.71609	-3.01437	-0.778741	0	-0.247872	-1.21916	46.796	-1.67885	-1.08794	6.35294	TAAAATACACCTTCATTTTTTTGGACTTGCGTATTTAGCCCCCTGGAACAGAGTTGTTCTGGATTTCAAA
Fancl			NM_025923	Fanconi anemia, complementation group L	-0.290798	-2.25083	9.724	-0.317236	-0.0470355	59.533	-0.216284	-1.23444	45.8725	-0.267519	-0.70087	27.8999	TTGAAAATGTCTGGGAGAAAACCTTGAATGGAACCTACCTGTGAAGAGATGGAATGCTTAAAAGTTGTTT
Ddx54		1	NM_028041	DEAD (Asp-Glu-Ala-Asp) box polypeptide 54	-0.30936	-2.24962	9.74765	-0.927768	-0.268457	41.9564	-0.254858	-1.42794	34.8098	0.164269	0.123018	84.3603	AACAGCTGCTTTTGACTGGGACATTGGGTGACCTCTGAAAGGATGCATAGGAGTCTAGCTATGCAAAGCA
Yipf3			NM_145353	DNA segment, Chr 17, Wayne State University 94, expressed	-0.359151	-2.24763	9.78615	0.184296	0.153108	48.4114	-0.222125	-1.06794	56.1076	0.504194	0.900094	19.4879	AACTCACAGCTAGGACTGCAAGTCTCTGCAGCCAAGTGCAGAATATGGGTCAGCTCTTCTGAGGCCCTCA
Prrc1			NM_028447	RIKEN cDNA 1190002C06 gene	-0.465974	-2.24639	9.81047	-0.104657	0.0335644	58.0456	-0.37328	-1.61046	25.9679	-0.563786	-0.763242	23.0321	CACCTTGGGCTCCATGCAGAGGAACCTGAGTGGCTTCCGTGAATCCAACAGTTTTTATGATTTTCCTGTA
Anp32b			NM_130889	acidic nuclear phosphoprotein 32 family, member B	-0.367838	-2.24491	9.83916	-0.501489	-0.119085	56.7727	0.00776329	0.380259	75.6707	NA	NA	NA	CCGCCCCCGCCGCGGAAAGTTAAGTTTGGAGAGGGGGGACGAGGGGAACATGGATATGAAGAGGAGGATC
Rpl24			NM_024218	ribosomal protein L24	-0.794006	-2.24183	9.89933	1.22947	0.433883	16.2878	0.536201	0.745851	59.2656	1.65072	1.28013	3.80375	CAAATTCCAACGAGCCATCACTGGTGCATCTCTTGCTGATATAATGGCCAAGAGGAATCAGAAACCAGAG
Atp5f1			NM_009725	ATP synthase, H+ transporting, mitochondrial F0 complex, subunit b, isoform 1	-0.445397	-2.2417	9.90203	-1.26178	-0.418591	23.6419	-0.280232	-1.2207	46.7028	-0.924527	-1.7494	0.969681	GTATGCGGAGTTATCTGATCATAATTTGAATAAGCAACTTGCAGCAACTTGCTGCCCAACTGAAATTACC
Acsl4		1	NM_019477	acyl-CoA synthetase long-chain family member 4	-0.372328	-2.24001	9.93505	0.555665	0.297597	31.2102	-0.338752	-2.36865	6.12539	-0.095237	-0.353313	61.5965	AACCATTATCTCAAAGACATTGAGCGAATGTATGGGGGCAAATAAAATGCGGCTCTCTGATTTCCATTTG
Use1		3	NM_025917	RIKEN cDNA 2010315L10 gene	-0.530807	-2.23778	9.97892	0.853615	0.417092	17.9021	-0.376351	-1.52151	30.0532	0.387833	0.633277	42.046	CATGCTCATTGTCGTGTGCTTCGTGTTCATCAGCATGATCCTGTTTATCCGAATCATGCCCAGGCTGAAA
Footnotes:
Genes for which there were dischordant oligos (direction of change was different or the same but with an FDR > 35% for one or more oligos) are marked with a footnote.
Genes with dischordant oligos are categorized into four groups based on possible explanations for dischordant behavior:
1	Alternative polyadenylation
2	Alternative splicing
3	Dischordant oligo in unanotated region of gene or otherwise suspect
4	No obvious explanation
(FDR, local False Discovery Rate, %; SAM, Significance Analysis of Microarrays)
