# Supplementary material for: Extensive Gene-Specific Translational Reprogramming in a Model of B Cell Differentiation and Abl-Dependent Transformation
Source: PLoS One. 2012 May 31;7(5):e37108. doi: 10.1371/journal.pone.0037108 (PMC3365017; doi:10.1371/journal.pone.0037108)
Supplement: Table S5 — MJ in vitro transcribed RNA sequences, and PCR primers used to amplify them. (XLS) [file pone.0037108.s008.xls]

## Sheet: Sheet1
Table S5. Primers used to amplify doping control sequences from MJ DNA and sequences of the amplified transcripts.
WellPosition	Doping Control Name	Forwad primer Name	Forward Sequence	Reverse Primer Name	Reverse Sequence		Final Product (synthetic polyA tail not included)
A1	MJ-125-1_6	MJ-125-1-FOR	GCGTAATACGACTCACTATAGGGAGACCATTTGGGTCGCAGTTG	MJ-125-1-REV	TTTTTTTTTTTTTTTTTTTTTTTTTATTGGTGGTGTCTTAATTAGAGG		CCATTTGGGTCGCAGTTGAATGGACATCCTTCAACAATTTCAATCTCTGGGAGTAAATCAGCCAAAGCCCTAACTGCTGTAGATTTCGCTGTCCCTTTCTCTCCTCTAATTAAGACACCACCAAT
A2	MJ-125-2_19	MJ-125-2-FOR	GCGTAATACGACTCACTATAGGGAGAAATGCCCAATGCCCAAAA	MJ-125-2-REV	TTTTTTTTTTTTTTTTTTTTTTTTTTCTGTTTCTGATGAAACTGTTACA		AATGCCCAATGCCCAAAATGTGGAGGAGCTTTAAGTATCGTTGAGGAAAAAGACTATATTGAATACCTCTCAGAACTATGTGAGCAGAGCGGGGCTAAACTTGTAACAGTTTCATCAGAAACAGA
A3	MJ-125-3_17	MJ-125-3-FOR	GCGTAATACGACTCACTATAGGGAGATCCTGTCTGTGGATTTCCA	MJ-125-3-REV	TTTTTTTTTTTTTTTTTTTTTTTTTTCATAACAGCCTTTCCTGC		TCCTGTCTGTGGATTTCCAAAATTAAAGAGAGCTTCAACATCAATATGGGTTTGTGGAAAGTGTGGAGCTAAGATAGCTGGAGGAGCATACACACCAGAAACAGGTGCAGGAAAGGCTGTTATGA
A4	MJ-125-4_20	MJ-125-4-FOR	GCGTAATACGACTCACTATAGGGAGAATCGTGGAAAAAGAGAGGAG	MJ-125-4-REV	TTTTTTTTTTTTTTTTTTTTTTTTTAGAAGAACATTGTTGTATGGAAAC		ATCGTGGAAAAAGAGAGGAGGTGACTATGATGGGTTTCCATACAATACTGTTCTCCTTAAACAATTTTAGAGATTAGGGGGGAGCCGCCCTCACACCTCCCGTTTCCATACAACAATGTTCTTCT
A5	MJ-125-5_37	MJ-125-5-FOR	GCGTAATACGACTCACTATAGGGAGACTCCACCAGTTAATGGGCT	MJ-125-5-REV	TTTTTTTTTTTTTTTTTTTTTTTTTTGCAACACCAATAGAATTCAA		CTCCACCAGTTAATGGGCTTATCTGCCCAGCAGCATCCCCCACAACTAAAAGACCATCAGTATAGGTTTTTTCTATAGGGCCAGAAACAGGAGCTCCTCCAACTTTGAATTCTATTGGTGTTGCA
A6	MJ-125-6_1	MJ-125-6-FOR	GCGTAATACGACTCACTATAGGGAGAAAGAAGAACGGTTATTTAAAGAAGT	MJ-125-6-REV	TTTTTTTTTTTTTTTTTTTTTTTTTAAGAAAGGCACTACTGGAAGAG		AAGAAGAACGGTTATTTAAAGAAGTCAATAATTTACAAAAAGGCTATTAGAGAGACGATGATTTGTGGGCTTATTGATGGAATATCAACAACTATTGGTTCAGCTCTTCCAGTAGTGCCTTTCTT
A7	MJ-125-7_47	MJ-125-7-FOR	GCGTAATACGACTCACTATAGGGAGAGAATTACTCTGCCTATGTTGAAAC	MJ-125-7-REV	TTTTTTTTTTTTTTTTTTTTTTTTTCATCTATTTTTTCCCCTAATGC		GAATTACTCTGCCTATGTTGAAACAAAGACAGAAATTCCTATAAAATCTGGATTGAGTAGTAGTTCAGCCACTTCTAACGCAGTTGTTTTGGCAACATTTGATGCATTAGGGGAAAAAATAGATG
A8	MJ-125-8_51	MJ-125-8-FOR	GCGTAATACGACTCACTATAGGGAGAGGAATGGAAATTATTACCACC	MJ-125-8-REV	TTTTTTTTTTTTTTTTTTTTTTTTTTTAATTGGCTCGGTAATGC		GGAATGGAAATTATTACCACCCTCTTGCTTTTAAAAAGCTTTCTAATTCTTCATTAAAATCAGACCGTTTCGGAATGGAAATAATCCAGATTTGAATTGTTCCCAAGCATTACCGAGCCAATTAA
A9	MJ-125-9_23	MJ-125-9-FOR	GCGTAATACGACTCACTATAGGGAGAGTGAAATGCATAACCCTCAAT	MJ-125-9-REV	TTTTTTTTTTTTTTTTTTTTTTTTTTGATACATCGTTATTTCCTTCTCT		GTGAAATGCATAACCCTCAATCTCCAACAGAGCTGAGAGTAATTGGCTGGGATTCAGTAAGTAACAAAATTATTCTTTTACCTTACTGGGTTCAAACCTGGAGAGAAGGAAATAACGATGTATCA
A10	MJ-125-10_9	MJ-125-10-FOR	GCGTAATACGACTCACTATAGGGAGAAGAAAAGTGGGCTGAATTG	MJ-125-10-REV	TTTTTTTTTTTTTTTTTTTTTTTTTTAGTGTAATCTGGAATGAAAATTATG		AGAAAAGTGGGCTGAATTGCTTAGTATAATCTTTGGTTCAAAACCTCGTGAAGACGAAATCGACAGTGTAGATAGATACATGACAAAACTATTCCTTCGCATAATTTTCATTCCAGATTACACTA
A11	MJ-250-11_1	MJ-250-11-FOR	GCGTAATACGACTCACTATAGGGAGAACTGGCTTTAAAGCAAGCTC	MJ-250-11-REV	TTTTTTTTTTTTTTTTTTTTTTTTTATATAGACCCGTTTGGCTCTC		ACTGGCTTTAAAGCAAGCTCATATTTTGTAGCCATTCTCATAACATATCCAACTAAAACCCTCAATGCAAATTCATGACAATCCCTACCAAATAATGGATAAGCCAAGTATTTCCTTAAGCATGATTTTTTAGACCTACCACATAATGCCGCTGTATCTGTTGCTGTTAAACAGAGCAAACCATTTCTTGTTACTAAAGCCCTAATTGCTTGCTCTACATAAGGAGCTGGAGAGCCAAACGGGTCTATAT
A12	MJ-250-12_35	MJ-250-12-FOR	GCGTAATACGACTCACTATAGGGAGAGGTGTTTATAGATTTTAAGTAATCTCTTG	MJ-250-12-REV	TTTTTTTTTTTTTTTTTTTTTTTTTCCCTCAAGAACGTCCAAA		GGTGTTTATAGATTTTAAGTAATCTCTTGTATTGGTTCTCCCGTTCTGTCCTCTTTTAATAAGAGGACTTCATCAGGGAGCGTTCGGGGGAACGGAAACTCCCCACATCCTGACTTTTCTTAAATAAATTAAATGTAGCAACAACATCCCTATCAAATACTAAATTACAATTATTGCATTTTAACAACCTCTGCCCATTCGGGTCTAATTTACACCCACATATTGGGCAGAGTTTGGACGTTCTTGAGGG
B1	MJ-250-13_72	MJ-250-13-FOR	GCGTAATACGACTCACTATAGGGAGACAGCAACTTCCCTCTGAGTT	MJ-250-13-REV	TTTTTTTTTTTTTTTTTTTTTTTTTAGAACTTACAGATTTTTAGCGAGA		CAGCAACTTCCCTCTGAGTTCTTCTACAGCCAAGAAGAACGCTTGCTATATATATTGCTGCAGCAGCAACACCAGTAGGGCCTCTACCGCTTGTTAATCCTTTTTCAGCCGCTTGTTGCAATATCTGTATAGCTTTGGACTCAACTTCCCCAGGCAATCCAAGTTCAGATGCAAATCTTGGCACATAATCAATTGGATTTGTTGGGGTTAATTTTATATTTAATTCTCTCGCTAAAAATCTGTAAGTTCT
B2	MJ-250-14_46	MJ-250-14-FOR	GCGTAATACGACTCACTATAGGGAGAGATAAAATTGGTTTTGTCTTTCAG	MJ-250-14-REV	TTTTTTTTTTTTTTTTTTTTTTTTTTTGGTGGGTTGTTTGCCA		GATAAAATTGGTTTTGTCTTTCAGCAATTCAACTTAATTCCTTTATTAACTGCCTTAGAAAATGTTGAACTTCCACTGATTTTTAAATATAGGGGAGCAATGAGCGGAGAAGAGAGGAGGAAGAGAGCTTTAGAATGCTTAAAGATGGCAGAGTTGGAGGAGAGATTTGCCAATCACAAACCAAATCAGTTGAGTGGAGGGCAACAACAGAGAGTTGCTATAGCGAGGGCTTTGGCAAACAACCCACCAA
B3	MJ-250-15_39	MJ-250-15-FOR	GCGTAATACGACTCACTATAGGGAGATGGTGCAACTATTGGAGG	MJ-250-15-REV	TTTTTTTTTTTTTTTTTTTTTTTTTATTCCCTGGGGCAGAATA		TGGTGCAACTATTGGAGGCAGAATTAAACCTTTCTCATCCCCATGTATTGCTATAATTGAAGCTATAACCCTATCTGAGATTCCGTAGCATGTTTGATAAGCATAATCTTTATCTCCAGTTGGTGTTTCAAATATAATTTCAAATGTCTTTGAGAAGTTCTGCCCTAAGTTATGGACTGTAGCTATCTGCATAGTTCTTCCATCTGGGAATATAGTGTCAAAAGCCATTGTGTATTCTGCCCCAGGGAAT
B4	MJ-250-16_77	MJ-250-16-FOR	GCGTAATACGACTCACTATAGGGAGATTGCCCTAAAATCTGGAAGA	MJ-250-16-REV	TTTTTTTTTTTTTTTTTTTTTTTTTTCAACACAGCTATCAGCTGC		TTGCCCTAAAATCTGGAAGAACTGAAGTAGGAAAGAAAGCGGCAAAATCCCACACTGGCTCTTTAGCTGGAGAAGATGTTATCTATGAGGCAGCGTTTAAAGAAGCTGGGATAATTAGGGCATATACGTTTGAGGAGTTAGTTGATTTAATCCATTTATTCTCAACACAGCCAACAATAAGCTCAAATGAAATTGGAATAATAACAAATGCAGGAGGATTTGGAGTTTTAGCAGCTGATAGCTGTGTTGA
B5	MJ-250-17_143	MJ-250-17-FOR	GCGTAATACGACTCACTATAGGGAGAACCTTATGTTACTCCAGGGACTA	MJ-250-17-REV	TTTTTTTTTTTTTTTTTTTTTTTTTAGGCATTTTCTTGAATTTTGG		ACCTTATGTTACTCCAGGGACTACAGGACATGGAGTTCCAACTGTTTGTTTTGTTAGTGGTTTAATAGGAGCGGCTTTAGGAGGAATTGGTGGAGCTTTAGCATACATTGCTTTAAGAAAACTCGGTTTAGATCCAGGAGTTGCAGGGATGTTAGCAGTTGGTTTCTTCTTTATCAATGCGGTTTTAGCATCATATAACATTGGAGGGACTATTGAAGGATTCCACGACCCAAAATTCAAGAAAATGCCT
B6	MJ-250-18_16	MJ-250-18-FOR	GCGTAATACGACTCACTATAGGGAGACTTCTCATCCTCTATGGTTCTTG	MJ-250-18-REV	TTTTTTTTTTTTTTTTTTTTTTTTTTGCCTCATTATTAGCTGATGG		CTTCTCATCCTCTATGGTTCTTGTTGCCATTATCGCCGGAACATTACATCCAAAGCCCATAACCATTGAGATAACTGCCTTTCCAGGCAAGCCGAATTTGTTCATTATTCTATCTGTGATAAATGGAATCCTCGCCATGTATCCACTATCCTCTAAGAAGGATATGGCAAAGAATAAAAATGCCAAGATTGGAAAGAACACTAAAACAGCTCCAACACCTGAAATAATCCCATCAGCTAATAATGAGGCA
B7	MJ-250-19_79	MJ-250-19-FOR	GCGTAATACGACTCACTATAGGGAGAATGATTAAAAGCTCAGGCCC	MJ-250-19-REV	TTTTTTTTTTTTTTTTTTTTTTTTTAGGTTGAGATTGGCACTATTG		ATGATTAAAAGCTCAGGCCCTGTTGTGTCTCCACCAACTACAGCTCCTTTGGAGTTTGCTATAATGCAAGCTCCAACTGAAGTGGTTCCTTTATTTGCTGTTCCTTTACCAATATATTCCACTTTGAACAAGCTTTTTAAGAATTCAAGTTCATCATCTTCCACTAAAGGATGGGTCAAACAGCCTTTGTTTGTTACAACGGCATTACTTCCAACGGTTGGAAGTTCAGCAATAGTGCCAATCTCAACCT
B8	MJ-250-20_3	MJ-250-20-FOR	GCGTAATACGACTCACTATAGGGAGAAAGATGTCGATGTTGGAACTC	MJ-250-20-REV	TTTTTTTTTTTTTTTTTTTTTTTTTACAGCAGGGACCTCAGATAT		AAGATGTCGATGTTGGAACTCCAATAACAGGAATATCAACCATTGAGGCGATAACTGAAGGTAAAGCTCCCTCCATACCAGCAACAACAATAATACAGCAAACATCTTCCTCAATCATTCTTTTTAAAGCTGGAAACAGCCTGTGAATGCCTGCAATTCCTACATCATAAGCAGTTATTGCTTCAACTCCCATTATTTCTAATGTGTCTTTTGCCTCCTCTGCCACTGGAATATCTGAGGTCCCTGCTGT
B9	MJ-250-21_131	MJ-250-21-FOR	GCGTAATACGACTCACTATAGGGAGATTCAGGGAAGTATTTTTTAATATAGTC	MJ-250-21-REV	TTTTTTTTTTTTTTTTTTTTTTTTTAAGAGGAAGCGTCCCTTG		TTCAGGGAAGTATTTTTTAATATAGTCAAAATCCCGGTCAACATAAATATGCATTGAAATAGCATGATGAGTATAAGTACCATAACCAACGCCAACCTTTTTTGCTATATACTCTCCCAACGTTATCAGACCTATCGCATTACTTACGAAAGCCAGTAGTGCGTCATTGCTTCTGAAGATAACAGTTTGATACAGTTTCCCATTTCTAATTAAGAATTGAACAAGTTGCAAACAAGGGACGCTTCCTCTT
B10	MJ-250-22_58	MJ-250-22-FOR	GCGTAATACGACTCACTATAGGGAGAAGGCTTTGTTATTGGTATTGACT	MJ-250-22-REV	TTTTTTTTTTTTTTTTTTTTTTTTTTAGCATCTCAGTAGCTATTTGTAAG		AGGCTTTGTTATTGGTATTGACTTACAACCAGTTAAGCCATTTGAATATGATAATGTAGTTGCAATAAAAGGAGATTTCACCTTAGAAGAAAATTTGAACAAAATTAGAGAGCTAATTCCAAATGATGAAAAAAAGGTGGATGTGGTTATAAGTGACGCCTCCCCTAATATAAGCGGTTATTGGGATATAGACCACGCTCGTTCAATAGATTTAGTAACTACTGCCTTACAAATAGCTACTGAGATGCTA
B11	MJ-250-23_88	MJ-250-23-FOR	GCGTAATACGACTCACTATAGGGAGATTACAATAGATGCGTTTAGAGTAGC	MJ-250-23-REV	TTTTTTTTTTTTTTTTTTTTTTTTTATAGAGAGAACAACAACCCCTT		TTACAATAGATGCGTTTAGAGTAGCTGGGGGAATTTTGCTCTTTAAAATAGCTTGGGACATGCTTCACGCAGAAATTCCAAAAACAAAGCACAAACCAGATGAAAGATTAGACCTTGAAGATATTGATAGTATAGTTTATGTCCCATTGGCTATTCCTTTAATCTCTGGCCCTGGAGCTATAACAACAACCATGATTTTGATTAGCAAAACCCAGAGTATCTTAGAGAAAGGGGTTGTTGTTCTCTCTAT
B12	MJ-250-24_95	MJ-250-24-FOR	GCGTAATACGACTCACTATAGGGAGATGAGATCGTTGAGATTCCAA	MJ-250-24-REV	TTTTTTTTTTTTTTTTTTTTTTTTTACAGTGTAATGATAGCTATTCGTTAG		TGAGATCGTTGAGATTCCAAACTTCTCAACTAAAACTTTTGTCACATTTGGTGATAAGAACGCTGGTAGTGTAGGGCCTAATACTATATTCTTAACTCCCAAGTAAAGCAAAGCTAATAATACAGTAACTGCCTTTTGCTCATACCATGAGATGTTATAAGCGATTGGAAGTTCATTTACATCGTTTAAGCCAAATGCATCTTTTAAAGCCAGTGCAATTTTAACTAACGAATAGCTATCATTACACTGT
C1	MJ-250-25_98	MJ-250-25-FOR	GCGTAATACGACTCACTATAGGGAGAAGTTTTTTCACCTTATGACTTCTC	MJ-250-25-REV	TTTTTTTTTTTTTTTTTTTTTTTTTGGAAATACAATATTGGATAAGATAGTATC		AGTTTTTTCACCTTATGACTTCTCATTCCATACGAAAGACAGATGGTTTGCTCCCAATGAACCCAGAGGGAGTTAAGGTTGATGATTCCCAAGTCCAACATGGAGTTATGCCTATAACGTCATGTTGGACAGACCCCTGTATTGAGCAGACTTAACTTATACTGATATACAGCTAAAATTTGAACAACAAATCTCTTAAATTTATTGTTGAGAATAAAAAGGATACTATCTTATCCAATATTGTATTTCC
C2	MJ-250-26_148	MJ-250-26-FOR	GCGTAATACGACTCACTATAGGGAGAATCAGCTAAGAATCCAAACGA	MJ-250-26-REV	TTTTTTTTTTTTTTTTTTTTTTTTTAATGATAATCATTGGAATTTTTATAATA		ATCAGCTAAGAATCCAAACGACACTGCACCAATAAACATCCCAATATTTATGCTTGTTGTAAAAAGCCCCATAGCTTCGCCTTTTCTATGTGTTGGGATGTCTTTAACTGCGAGAGATGTTGTGGCGGTGGAAGATATTGAACTACCAACTGCTATAATTGTTAAAGAAGCCAATATAGTCAAAAAAGTTGTAGAGGTTGAGAGCAAATACATTCCAAAGGATATTATAAAAATTCCAATGATTATCATT
C3	MJ-250-27_88	MJ-250-27-FOR	GCGTAATACGACTCACTATAGGGAGATGCCTTCAAGTATTACGATGA	MJ-250-27-REV	TTTTTTTTTTTTTTTTTTTTTTTTTTGGCATTGGTCTTGGTTC		TGCCTTCAAGTATTACGATGAATTGGCTGAGTTTTGTAAAAGGCATAACATCCCATTTCTCCCTCTACCAACAATCTCAGAAATTCATCCAGATTTAGAGAAGGATAGGACAGTAGATGATGACGTAAAGAATAAAGTTGTCAAATATTTGGGATATGAAGGGGTTTATAATTACAAAAATCTTCTTTTATATTTGGCAAATAGGTTTGGAAATTTAAATGTTGAGTATGAAGAACCAAGACCAATGCCA
C4	MJ-250-28_69	MJ-250-28-FOR	GCGTAATACGACTCACTATAGGGAGAGAATTATAAGAACACACTGCAGAGA	MJ-250-28-REV	TTTTTTTTTTTTTTTTTTTTTTTTTCCCCTATTAATAAAAAAAGAAAGG		GAATTATAAGAACACACTGCAGAGACTTTGTTATAACACCAGATATGGTTGGATTAACCTTTGGTGTCTATAACGGAAAAGAGTTCGTTGAAGTTAAAGTAACTCCAGAAATGATTGGACACTACTTAGGAGAGTTCTCATTAACAAGAAAACCAGTTCAGCACGGAGCTCCTGGTATGGGAGCTACAAGAAGCTCAATGTTCGTTCCAATCAAGTAAATTCTTTACCTTTCTTTTTTTATTAATAGGGG
C5	MJ-250-29_158	MJ-250-29-FOR	GCGTAATACGACTCACTATAGGGAGAATGGAAAGCAGCTTGTGG	MJ-250-29-REV	TTTTTTTTTTTTTTTTTTTTTTTTTTTTCTGTCTATCAATTGTTATAATGC		ATGGAAAGCAGCTTGTGGCGATACCTTCAAGTTCAAAATTTTTCCCCATAATTAAAATCAGACCGTTTCGGAATGGAAAGACTAACTTTAATTATATCCCTTTCAGCTTCCTCATCATAAATTAAAATCAGACCGTTTCGGAATGGAAAGTAGAAATTGTCTCAATAACTGCGTTTGTTGATGGAACAATTAAAATCAGACCGTTTCGGAATGGAAAGCAAACAGCATTATAACAATTGATAGACAGAAA
C6	MJ-250-30_89	MJ-250-30-FOR	GCGTAATACGACTCACTATAGGGAGAAACCATTCGCTGCCTATAGA	MJ-250-30-REV	TTTTTTTTTTTTTTTTTTTTTTTTTATAACTGCCAATACGTAAGCTAAC		AACCATTCGCTGCCTATAGAGTCTCAAGTAGAAGCTTTCCAAACAGAGAGGCAAAGAAAATGGATGACAATACAGTTGCAATAATTCCAAAGGATTTGAATGAGATGTTTAAAAACCCATATATCACATACAATTGCATAAAGGTTATTGATAAAACGATTGTTGTTTCTAACGGAACACATACTGACTTTATAGCTGAAAAATTGCACTTTGGAAAGAGAGATGCGTTAGCTTACGTATTGGCAGTTAT
C7	MJ-500-31_28	MJ-500-31-FOR	GCGTAATACGACTCACTATAGGGAGAATCTCCTCTAACTTTGGAGAGGT	MJ-500-31-REV	TTTTTTTTTTTTTTTTTTTTTTTTTACGTTTCATTCAATGGCAC		ATCTCCTCTAACTTTGGAGAGGTAGGAATGGGAGTATTTGCACTTGTGGTAACGGTATTTGCATTATTGATGGTTTTTACTATGTTGGGTATGCTGTTCGATTTCTTAAAGGACTGAATATTCGGTGGCAGTATGGGATTTCTAAAAATAATGTTAAGAATTTTTTGCTGGTTTTTTGCGACGTTGGTGTTGTATTCTATAGCTCCATTATGGCCGTTATATGGAATCATTGGAGTGCCAGTAATTCTACCACGCCTTATATTTAAAGACAAAAAGAAGTGTCTAACAACAACATCCACACTACTACTCCTTGTCATATTTCTTCCTGAATTGCTGATTCTTATTGGATTTCTGATATTTCCTATTGTTATGGGCTATTACATCTCTAAGGAATTGGTG…
C8	MJ-500-32_343	MJ-500-32-FOR	GCGTAATACGACTCACTATAGGGAGAAAATTAACTTCCTCCTTTCCAG	MJ-500-32-REV	TTTTTTTTTTTTTTTTTTTTTTTTTACTTCCGTAGGGGCATAAC		AAATTAACTTCCTCCTTTCCAGTAACTGCTATATACATATCTGCATCCTCTATTCCAGCATCCTCCAATGTTTTTATCTTTGTGCAGTCTCCATTAATCACTAAAGCATCAATCTCTGCAGATGCTTTTTTGCAGATATCTTTATCTATGTCAATTAAAACAATGTCGTGTCCTTTTTCAGATAGAGATTTAGCTAATGTATAACCAACTCTACCAATCCCAGCTATTATTATATACATAGTTTGACACCAAAAAACTTTAATTATAGGATTATTTTTTCATAATATTCATCACCATAGGGCTTCGCCCTATTGGCACAGGACTTTCACAGTTTTATAATTCAATATAAGGAATTATGATGTCTATAGCATCATTATGTTCAATAAGAAATTTATTCCT…
C9	MJ-500-33_223	MJ-500-33-FOR	GCGTAATACGACTCACTATAGGGAGACTCCACAGATTCCCATGTG	MJ-500-33-REV	TTTTTTTTTTTTTTTTTTTTTTTTTATTCCACATAGATATCTGTGTTACTG		CTCCACAGATTCCCATGTGTCCAATTCTGAATATCTTTCCAGCTAAGTGCTTCTGCCCACCAGCAACAACTATGTTGTATTTGTTGCTTAATATACCTCTAAATTTGCTATCTTCAATGCCTTCTGGATATTTTGCTGATGTAACTGTTACTGACCTTGCCCTCTCCTTGGCAAACAACTCTATTCCCATTGCCTCCAAACCAGCCCTTGTTGCTTTTGCTAATCTCTCATGTCTTTTAACCCTATTCTCGATTCCTTCCTCTAAAACTAAATCTAATGCAACATTTAAGGCATAGGTTAAATTAACTGATGGTGTGTATGGGGTTTGTTTTTTCTCTTCATAGTATTTTTTATAAGCCAATAAATCTAAGTAGAAACCAACTTTGTCATCATTCTTCT…
C10	MJ-500-34_224	MJ-500-34-FOR	GCGTAATACGACTCACTATAGGGAGAGGTGTTTATCTTACGTATTTAACTAAGC	MJ-500-34-REV	TTTTTTTTTTTTTTTTTTTTTTTTTAACTTGTTGAAGCTGGTTTG		GGTGTTTATCTTACGTATTTAACTAAGCTTGGACATTAATTGGGGCTGATAGCCCCAACTTAATGGACGGGAGGTATCCCAATAGGAGGTCTCCTCCTATGGGCTGACAATCCACTCATAGTTGTTTGTGTTTAGTTTAACCTCTCCTGGCTTGGTTGTTAGAGTTTTTCCAATCTCTTTCAGTGTTTTAACTGATATTGGATTGAGCATCATGAATAAATCTACTCCACACATCATCATCGTAATTCCAGTAGTTATTTCCCATAATGGTAATCTATACTCTCTTGGCCCCCATTCAGGATTGTTCATCCATGCCTCTCTTGCTCCAATAGCGTTTGTTGTTCCAGATGACATTGGCATATTAACCAACTCATCTCCCTTCAATCCATTTAATCTTAA…
C11	MJ-500-35_131	MJ-500-35-FOR	GCGTAATACGACTCACTATAGGGAGATCTTGCTTCAACAATAACGTCT	MJ-500-35-REV	TTTTTTTTTTTTTTTTTTTTTTTTTATGTGCCTGCATTTAAAATTG		TCTTGCTTCAACAATAACGTCTCTTTCAGAAGGCATTGGTATCTTTTCCCCACTTCCAAGCATTTTTTCAACTAATCTTATGTTATTAACCATTTCCTTAAATTCTTCTGGGTCTGCTGACAAAGCATGATCAGGACCTTCCATATTTTTATCTAAGGTAAAGTGCTTCTCAATAACATCCGCTCCTAAGGCAACAGAAACTACTGGGGCGAGTATTCCCAATGTATGGTCAGAATATCCCACAGGGATATTGAATATACTTTTCAAGGTTTTAATAGCGTTTAAATTGACATCTTCATAAGGGGTTGGGTAAGATGAAATACAATGCAATAAAATAATATCCCTGCATCCATTATTTTCTAAAACTTTAACTGCTTCCCAAATTTCCCCAATATCAGA…
C12	MJ-500-36_229	MJ-500-36-FOR	GCGTAATACGACTCACTATAGGGAGAACAAGGTAGCTAAGAACTTTGAGG	MJ-500-36-REV	TTTTTTTTTTTTTTTTTTTTTTTTTTCCATTTTCACACCATAGGG		ACAAGGTAGCTAAGAACTTTGAGGAAGTATATAAGGAGATTGGAGGTATTGGGAAGCTGAGCTTAGAGAATGAGAAGAATCCATTTGAAGGAGGGATTTTGATAGATGCATCTCCAAGAGGCAAAAAGCTTTTAAGCTTAGATGCTATGAGTGGGGGAGAAAAATCATTAACAGCTTTAGCATTTTTATTTGCTATTCAAAGGCTAAATCCTTCGCCATTCTATGTATTGGATGAAGTTGATGCCGCTTTAGATGTAAAAAACGTCTCTTTAATTGCTGATATGATTAAAAACGCCTCTAAAGACAGCCAATTTATAGTTATAAGCCATAGAGAACAGATGGTTAGTAAGGCAGATGTTGTTTATGGTGTTTATATGGAAAACGGTTTAAGTAAAGTTG…
D1	MJ-500-37_325	MJ-500-37-FOR	GCGTAATACGACTCACTATAGGGAGATGGACATTAATTAGGGCTGAA	MJ-500-37-REV	TTTTTTTTTTTTTTTTTTTTTTTTTTGGATTTTTATCCGCTTTG		TGGACATTAATTAGGGCTGAAAGCCCTAACTTAATGGACGGGAGGTATCCCAATAGGAGGTTTCCTCCTATGGTTTTCAAAACAATCACCATCATGCTATTAATGATATTAAAATCCCAACTATACCAAAGAATATCCCAATTATCCATAAAACTGTAACTAAGTGAGGCTCTCTCATTGGTTTATACTTCAATATAAGCCTTGGTAGGGATAGATAGCCACCTATATAGTATAGCTTCCCATCTTCTTTGAGAGTTGTTGGTTTATGCTCATCCCTACTCATAACCCCAGCACTTAGATATTTTAAAGAGGCATCTATCACATAAGGCATCATTATAACTAAAAATGGGATATATTCCTTATAAACTACTGCTAAGACAGCTAAGAAAGCTCCAATTG…
D2	MJ-500-38_213	MJ-500-38-FOR	GCGTAATACGACTCACTATAGGGAGAGGCCAGTTCCTTTAGAGAGAC	MJ-500-38-REV	TTTTTTTTTTTTTTTTTTTTTTTTTTGCCACTTCATCCTCAGTATT		GGCCAGTTCCTTTAGAGAGACATATAATTTTCTGCAAAAATGACTTTGCCAAACTAAATATTATCAAAGAAATTGTTAAAAGAGAATGGCAGAACATTTCAAAATTTGGATATAGAGGGCAGTGCTTAATATTTACTTACTCAAGAAAGAGAGCAGAGTATTTAGCTAAAGCTTTAAAATCTAAAGGAATTAAAGCAGAGTTCTATCATGGAGGTATGGAATATATAAAAAGAAGGAAAGTTGAAGATGATTTCGCAAATCAAAAAATTCAGTGCGTTGTTACAACTGCCGCTTTATCTGCAGGGGTTGATTTTCCAGCATCAACTGTTATCTTAGAGAGTTTAGCTATGGGGGCTGATTGGTTAAATCCTGCTGAATTCCAGCAAATGTGTGGGAGGG…
D3	MJ-500-39_100	MJ-500-39-FOR	GCGTAATACGACTCACTATAGGGAGATGCTCTTCACTCATCTCACATAA	MJ-500-39-REV	TTTTTTTTTTTTTTTTTTTTTTTTTCCAACACAGGAAGGTTTAAGA		TGCTCTTCACTCATCTCACATAATGGCAATCTTAACTCGCCAGCAGGTCTTCCCATCATATTTAAGGCAGTTTTAACAGGAATTGGGTTGGTTTCAATGAACATCGCCTTCATTAATGGGAACAATTTATAATGAATTTCCCTTGCTTTTTCGAAATCTCCTTCTAATGCGTAATTAACCATTTCAACAAACTCTTTTGGGACGATGTTGGCCACTACGCTAATAACCCCTTTTCCTCCTAAGGCGATTATTGGGAGGGTTAGTTCATCATTCCCTGAAAGAACTGTTATCTTAGCATCATGTATTAGCTCAGAAACTTGGGAAAGATTTGGATTTGCCTCTTTAACTGCTGAAATATTGCTGTATTCTTCAGCTAAAAGCTTTACTGTCTTTGGTTCT…
D4	MJ-500-40_49	MJ-500-40-FOR	GCGTAATACGACTCACTATAGGGAGAATGCTCACTACACAAGTTATGTTG	MJ-500-40-REV	TTTTTTTTTTTTTTTTTTTTTTTTTAACAACATGAGGAAAGCTTG		ATGCTCACTACACAAGTTATGTTGCCGCTGAAAGAGCTAAGCTAAACGTTGCAGAGGTTGGCTATGAAGAGGAGTATCCAACATATAAGATAAACTTAGAGGGTTATAAGGAGGTTATAGATAATTTAGAGGACAAGGGAAAAAATGTCGGATTGATATTATTAACTCATGTAGATGGAGAGTATGGGAACCTAAACGATGCAAAAAAAGTTGGTAAAATAGCTAAAGAAAAAGGCATCCCATTCCTACTAAATTGTGCATATACAGTTGGAAGAATGCCAGTCAATGGAAAGGAAGTTAAGGCTGATTTTATTGTTGCATCAGGGCATAAGAGTATGGCAGCATCAGCTCCATGTGGTATTTTGGCATTTAGTGAGGAATTTTCCGATAAAATAACAA…
D5	MJ-500-41_4	MJ-500-41-FOR	GCGTAATACGACTCACTATAGGGAGACCTTCATAATACCACCAAAATAC	MJ-500-41-REV	TTTTTTTTTTTTTTTTTTTTTTTTTTGCCATGACAATGGGTTT		CCTTCATAATACCACCAAAATACCAATTCGAAAGTTTTAGCATATTCAAACAATATAAAATCTTCAGATTGGACATTAATTGGGACTGAAAGTCCCAACTTAATGGACGTGTGGTATCCACACCATAAAGGGGCTACGCCCCTCTTGGGATACTCCCCTAATATTGCTAATTTACACCTCCGAGCATAAGCGAGGAGGTGTTAGGTTTTGATGAACCTTTTACTAAAAGGTTCATACCAATAGGAGGTTTCCTCCTATGGTAGTTAAATGTACATTGGATATTCCTTTCTACTCTTTGACATCATCTTTAAATGTTGCTCTGCCAGTTCTTTAAGTTTGTTTTCAATAGCTTCAGCCTCTTTGATGAGATTTTCAATATTTACATTTAGATTGAACATT…
D6	MJ-500-42_157	MJ-500-42-FOR	GCGTAATACGACTCACTATAGGGAGATTGATGATGATACTTAACCAAACC	MJ-500-42-REV	TTTTTTTTTTTTTTTTTTTTTTTTTATTTCAAAAGCCAAATCCTTT		TTGATGATGATACTTAACCAAACCTACCACTAATGTAGTCATCTGTCTCCTTCTTCTGTGGATTTAGGAATATCTGCTCTGTCTCTCCAAACTCAATTAATTTCCCCATTAAGAAAAAGGCAGTGTAATCAGAAACCCTACTTGCCTGCTGCATGTTGTGGGTAACAACAACAATCGTATAATCTTTAGCTAACTCAACCATTAACTCCTCTATCTTTAATGTGGAGATAGGGTCTAAGGCAGATGTTGGTTCATCCATCAATAAAACCTCTGGCTTAACTGCTATCGCTCTCGCTATACATAACCTCTGCTGTTGTCCTCCAGAGAGAGATAAAGCGTTTTTATGCAGTTCATCTTTAACCTCATCCCACAAAGCCGCTTTCTTTAAAGCCCACTCAA…
D7	MJ-500-43_212	MJ-500-43-FOR	GCGTAATACGACTCACTATAGGGAGAAGAGCTGTTAAAAAAGTTGGATG	MJ-500-43-REV	TTTTTTTTTTTTTTTTTTTTTTTTTTTGAAGAGATTAAAAATCTAATTGC		AGAGCTGTTAAAAAAGTTGGATGTACATTCAACAATCCACATAGCAAAGAAAAAAGGAACTGAATCAAATATTAGAGGTGAAATTTACCATTATAAAGACGATTTTTATAGATTGTCAATCCATAGAAAAGAATCTGTTAGGAACTTTGCTATAAAAGTCAGTTTCTCTATAAAAAGAAAACGAGAAAGACTCCAAAAACTCTTGGAATCTATGGATAAACATTAATTCTTACATTTAAATATACAAATATAATATATCAAAATATAGAAATAGTAGCGGGGGGAGGATTTGAACCTCCGATCTCCGGGTTATGAGCCCGGCGGGATGGACCTGGCTACCCTACCCCGCTTCACTCAACTTTTAATCCAAAACAAGCGAAATTACTATAACTACAAACT…
D8	MJ-500-44_319	MJ-500-44-FOR	GCGTAATACGACTCACTATAGGGAGACTTCTGAGCATATAGCAAAGATAAT	MJ-500-44-REV	TTTTTTTTTTTTTTTTTTTTTTTTTAACTTTGATGATTGATTGTTTTG		CTTCTGAGCATATAGCAAAGATAATTTTATCTGCAAGCAAATTCAACCCAGAGATAAGGGCTTGCATGAATATAAAATATGATGGGGGGTTAATAAAGTTGTTGAAGGATAAATTTGCAGTTTCTTCATTTGATAGAAAAGAAGAGCCGCCAAATGTCTCAACTATGGAATGGGGAACAAAAATAGCTTGTGAAAAATTTGGTGGAGTTCCAGACATTATTTATGATAGGGGAGGGGAAGGAAAAGAGCCGATGATTAGAGTTTTAGGTAGAGATGCTATTGAAGTTGTTAAAAAAGTTGAAGTTATTCAAAAGATATATAACACATTAATGTAAATATTTAAACATTTTAATTAAATTTTATAAAATTATAAAACTAAACCTTTTAGAAATCAAAAAA…
D9	MJ-500-45_108	MJ-500-45-FOR	GCGTAATACGACTCACTATAGGGAGAGAAACCTATATGCTTGATTTATCAG	MJ-500-45-REV	TTTTTTTTTTTTTTTTTTTTTTTTTCTTGCGTGTGCATACTGTATAA		GAAACCTATATGCTTGATTTATCAGACTTTGGCATTGAAAAGAAAATGGTTTTAGCAAGGGCAAACGGAACAAGCTTGTATTCAACAAGAGATATTGCCTATCACTTAGATAAGTTATCAAAGTGCGATATAGGAATAGATGTCTTAGGGGCTGACCACAAATTAACGGCAGAGATGGTTAAAGCAGCTTTAAAACTCCTTGGAAGCAAAGTGCCAGAAGTTATATTCTATGAATTCATCTCCCTTCCAGAAGGTTCAATGAGTACAAGAAGAGGAAGATTTATAAGTACCGATGAGTTGTTAGAAGAGGCGATAAAAAGGGCTAAAGAAGAGTGTAATAAGAGAGGTGTTGAGGAAAATATTGCCTATGATATTGGATTAGGGGCAGTTAGATACAAC…
D10	MJ-500-46_121	MJ-500-46-FOR	GCGTAATACGACTCACTATAGGGAGAATCGACAATAAACAAAGAAATAGAA	MJ-500-46-REV	TTTTTTTTTTTTTTTTTTTTTTTTTTGCTTTGATGTTGGATGAGA		ATCGACAATAAACAAAGAAATAGAACTTTTAACACCAGAAGGAAAAATATTTTTGAAGAAAATTGGTTATGTTGATTACTATGAGGCAGGTAGTTTAAAATTAGCTGAAGAAACAGCAAAAAGAGATGAGGACGTTATTATATTAAAAAATCATGGAGTAGTTTGTTTAGGTAAAGATTTGATAGATGCATATATAAAAGTGGAGGTTTTAGAAGAACAAGCTAAACTTACACTTTTAAACCTTCTTGTAAAGAAATAGTGGGGATTTTTAAATTTATTTAACTCTTTCTAATTCACTAACAATACTCCAAATTTGTGTTCTTGTGTGAAGTGGCATGTTTGGGTCGTTGCTAATCTCATCTAAGATGTGGATTGCTGTTGCACTTCTAACGATTGGCT…
D11	MJ-500-47_32	MJ-500-47-FOR	GCGTAATACGACTCACTATAGGGAGAACAGCTATAACAGTAGATTTATCAAACT	MJ-500-47-REV	TTTTTTTTTTTTTTTTTTTTTTTTTCCGTAAATGCAAGATGCC		ACAGCTATAACAGTAGATTTATCAAACTCTTATAAAGATTTGGTAAAGGCATCTGAAGATGCACTATATACAGTTATTAAGGAGATAAACCCTCCAATGAACATTGGAGAGATGGGAAAGATTATTCAGGAGGTTATTGAGAGTTATGGTTATAAACCAATATCCAACCTCTCTGGACATGTGATGCATAGATATGAGTTGCATACAGGAATTAGTATTCCAAATGTCTATGAAAGAACCAATCAATATATAGATGTTGGAGATTTGGTGGCTATAGAGCCGTTTGCAACAGATGGCTTTGGAATGGTTAAAGATGGGAATCTTGGAAACATATATAAATTTTTAGCCAAAAGACCAATTAGATTGCCACAAGCAAGAAAACTTTTAGACGTTATATCA…
D12	MJ-500-48_317	MJ-500-48-FOR	GCGTAATACGACTCACTATAGGGAGAGAGGGAGCTATAGAAGCATATAAC	MJ-500-48-REV	TTTTTTTTTTTTTTTTTTTTTTTTTTCACATGTAAATTGCAAAGAATT		GAGGGAGCTATAGAAGCATATAACAAGGCAATTAAGCTAAATTCACAAAATCCATATGCATATTTTGGATTGGCCATACTTTATTACAGAAAAGGAGAGTTGGAAAAATCCTCAAACTTTTTTGATAAAGTCTTAGAAACATACCTTGAAGAACTCTCAGAGGAAGATATTAGCGCACTCAACTTATACTCCCTAATTGGAAAAGCTGAGACAACAGGAATCCCAAAATACTATCATGAGGCTATGAAATATGTAGATAATTTAATAAATCTGGAAAACAGCAGTAGATGGTGGTATGTCAAAGGGTATATTTATTACAAGTTAGGGAACTACAAGGATGCGTATGAATCTTTTATGAATGCTTTAAGAGTGAATCCAAAAGATATTAGCACATTAAAA…
E1	MJ-500-49_392	MJ-500-49-FOR	GCGTAATACGACTCACTATAGGGAGAACACCTCCAAGCGTAAGC	MJ-500-49-REV	TTTTTTTTTTTTTTTTTTTTTTTTTTTGTGAGATACTGGCACAAAA		ACACCTCCAAGCGTAAGCGAAGAGGTGTTAGTGGGTATCGCAGGACTTTCACAGAAATAAAATTCTATGACGAATAAAGATGCCTTTGGCATCAAAATTCCTTATATGTATAAGAGCTGTGAAAATCCTGTACCAATAGGGCGAAGCCCTATGGCTGTGAAGGCTATAAAAAGAATATTGTAGGTTTTTCGCAAAAGGCAATAGAATATTAAAAAAATATATCGTGTGATTTATATGGGTGGAATCGTTGGAAACAATAGTTTATTAGCCAAAATTGGAGATTATGGGGAAATTGAATACCTTTTTTATCCCCAAGTTGGTTATGAAACTCATTTCTTTGACTCTGCATTGGCAGTTTATGATAAAAAAGTAAAGTGGCATTGGGATGATGATTGGGAT…
E2	MJ-500-50_272	MJ-500-50-FOR	GCGTAATACGACTCACTATAGGGAGATTGGCGTTATCTACCAAAATG	MJ-500-50-REV	TTTTTTTTTTTTTTTTTTTTTTTTTAACTCTTACAACTGGTTTATCAGATAA		TTGGCGTTATCTACCAAAATGTCTCATCATTAGTAGTTTCAGTTGGTTTAATTGGTGCTGCTGTAACATACGCTTTACAAAAGCCAATTTTAAACTTTGCTGGATGGATTATCATCCTATATACAAGAACAATAAAGATAGGAGATAGAATTTTTATTAAAAATATGGGAGCTGGGGATGTATTTGATATAGATACTCAACACATTTACTTAAGTGAATTAACAACAGACACCTTTGAACCAACAGGAAGGGTCTTAATTATTCCAAATTCTTATATATTCACCGCCTCAATAGAAAACCTTACAAAAGGGTCTCCATATATTTGGGATAACATAGTTGTGCATTTTACACTAAATAGCAATATAAACAAGGCAGAAAAAATTGTTTTTGAATCAGCAG…
E3	MJ-500-51_69	MJ-500-51-FOR	GCGTAATACGACTCACTATAGGGAGAATGACTGTAAAAATATATAAAATTCTTTAT	MJ-500-51-REV	TTTTTTTTTTTTTTTTTTTTTTTTTTCTGACATCTTCCAGTAATTGC		ATGACTGTAAAAATATATAAAATTCTTTATTGCATAAGGGAAGCTTTAATAACAAATTTGTTACATCAAGTGGAGTTATAATTTGAGAATACCACATCAACCCGCCCCATAAGACATAGGCGATAGGATAGATTGCCAATCTAACTAAAATCCTTTTATCCACAATCTCACCGTTTAAATCAATATTTTTGTGGGTGGTAATATTAAATTCTTAGAAGCTATGGTAGATTTCTTAGAAAGAAATGTAAAAACTATATTTTCCTATCCGGGAGAGCAGATATTGCCGTTGTATAATGAAATAGAGGGTAGCAGTATAAAAAATATTATGGTTAGGGATGAGAGAGGAGCAGGGTTCATGGCTGATGGCTATGCAAGAATAACTAACTATATAGGAGTTTG…
E4	MJ-500-52_60	MJ-500-52-FOR	GCGTAATACGACTCACTATAGGGAGAATGTCTATGATTTGAGCGTTGA	MJ-500-52-REV	TTTTTTTTTTTTTTTTTTTTTTTTTTCTCGGTAAGTTTAGAGAGTACCA		ATGTCTATGATTTGAGCGTTGAGGATAATGAGAACTTTATAACAGCTACTGGTATCTTATGCCACAATACAATATTCAGCTCCATTAACTTAGAATTGGAAATCCCAGAGTTTTTAAAGGATAAGCCAGCAGTGATAGCTGGAACTACAAGAGGAACTTATGGAGATTATGAGGAGGAGGCGAAGTTAATCTTAGAGGCATTAGTTGATGTGATGATGGAAGGAGATGCAATGGGAAAACCATTCTTATTCCCAAACTTTATAATTAAGTTGAGAGAGAATGCCTTTAAAGATGAAAATAAAGAACTTATGTATAAAATCCACCAATTGTCTGCTAAGTTTGGGATTCCTTACTTTATAAACATGCTTCCAGATTGGCAGGTAACTAATACAAATGCAA…
E5	MJ-500-53_345	MJ-500-53-FOR	GCGTAATACGACTCACTATAGGGAGAGCAATTATCCCACCAAGTTATAT	MJ-500-53-REV	TTTTTTTTTTTTTTTTTTTTTTTTTATTCTTCAATCCTCTCATCGTT		GCAATTATCCCACCAAGTTATATAGCAACCTATGTAGGAGGAAACTCCATAACTGCCAACTTTATTGCCTCATTTATTGGAGCTTTGATGTATTTCGCCACATTAACAGAAGTGCCAATTATAAAGGCATTGATGGAGCTTGGTATGGGTGTAGGGCCGGCAATGGCTCTGCTGTTAGCTGGACCAAGTTTGAGTATTCCAACAGTCTTAACCATCTCAAAAGTCTTAGGAAAGACGAAGGCTTTAACATATTTGGGTTTAGTTGTTATATTCTCAACAATATGTGGCTATATAGCTGGAATAATCCTCAGATAAGATAATATTTGGTGAAGAAATGAAAAAATTAGCTTTTTTAATACTTTTAATTGTATTTTCTAATTTATCATTAGTAAATGCTAT…
E6	MJ-500-54_379	MJ-500-54-FOR	GCGTAATACGACTCACTATAGGGAGAAACAAATAAGTGGTATTAAAGCATTA	MJ-500-54-REV	TTTTTTTTTTTTTTTTTTTTTTTTTATGTTTATTTATATTGTAGCAGAGATAATC		AACAAATAAGTGGTATTAAAGCATTAAACTATAAAGGAAATATCCCGTTAGAATGGCACCCTCCATGCATCAGAGGAATTTTAAATGACATTTTAAGTGGTGGCTCACCCTCACATTACGCAAGGAGGAGCTTTGTTGTATATTGGTTTTGCGCTAAATTCAACCCTAACTTAAGACCTTTAGATAAAAATGGGAATTTGGTTAATGTTTCAGCTACAGACATCGCCTCTGAGGAAGAGATTGAGAGGTTTATAGATGAACTTATTGAGATGTTGTTTAAAAATGTTGAGGACTTTGATGAGAAAAAGACAAGATACTATATTATGCACAATATTGGCTATAAGGTAGGGCATGGAAGATTAACTCACTGTGAATACTGCAAAAACTGGCAAGATGATG…
E7	MJ-1000-55_44	MJ-1000-55-FOR	GCGTAATACGACTCACTATAGGGAGAGGTGTAGCATACTTAGGGGAG	MJ-1000-55-REV	TTTTTTTTTTTTTTTTTTTTTTTTTATGAACCTTGAGCTATCATCTTT		GGTGTAGCATACTTAGGGGAGCTTACACCAAAGTCAAGAGACTATATATTATCATTTGGAGAGAGGTTGTCCTCACCAATATTAAGTGGAGCTATTAGAGATTTAGGAGAAAAGTCTATTGCTTTAGAAGGAGGAGAAGCAGGAATAATAACGGATAACAACTTTGGAAGTGCAAGAGTTAAAAGATTAGAGGTTAAAGAGAGATTGTTACCATTATTAAAAGAGGGCATTATTCCAGTGGTTACAGGATTTATAGGAACCACTGAAGAGGGTTATATAACAACCTTAGGAAGAGGCGGAAGTGATTACTCAGCCGCTTTAATTGGTTATGGCTTAGATGCAGATATTATTGAAATTTGGACAGATGTTTCTGGAGTTTATACAACAGACCCAAGATTA…
E8	MJ-1000-56_269	MJ-1000-56-FOR	GCGTAATACGACTCACTATAGGGAGATATTGGTGGAGGGGCACA	MJ-1000-56-REV	TTTTTTTTTTTTTTTTTTTTTTTTTAACCTAAGACATTATCTAAAAGAATGA		TATTGGTGGAGGGGCACAAGTTGCTGAAGTTGCGAGAGGGGCGATAAGTGAGGCAGACAGGCATAATATAAGAGGGGAGAGAATTAGCGTAGATACTCTTCCAATAGTTGGTGAAGAAAATTTATATGAGGCTGTTAAAGCTGTAGCAACTCTTCCACGAGTAGGAATTTTAGTTTTAGCTGGCTCTTTAATGGGAGGGAAGATAACTGAAGCAGTTAAAGAATTAAAGGAAAAGACTGGCATTCCCGTGATAAGCTTAAAGATGTTTGGCTCTGTTCCTAAGGTTGCTGATTTGGTTGTTGGAGACCCATTGCAGGCAGGGGTTTTAGCTGTTATGGCTATTGCTGAAACAGCAAAATTTGATATAAATAAGGTTAAAGGTAGGGTGCTATAAAGATA…
E9	MJ-1000-57_351	MJ-1000-57-FOR	GCGTAATACGACTCACTATAGGGAGATTCTATTTAGCCCCATTCTCC	MJ-1000-57-REV	TTTTTTTTTTTTTTTTTTTTTTTTTAGAGGCATTGCCGAGCGT		TTCTATTTAGCCCCATTCTCCTGTTTTACTGGATATGGCATAAATTCAACTGTTCCCCTTTGTCTTACTGGTTGCTTATACAATTCCATTAATGTATAAACCTCTTCAGGAACATTCGTATCTACATCTAAACCAAGTTCTTTAGCTTCTTCAACAGTTATTGGATAGTCATGAGTCCATCTTCCTTCTGTTAATATCTTAGACAATTCTTTGGCTTTTTCTTCTCCATACTTATCCTTCAATAAATTATATACAAAATTTTGAACTTGATTTATTGCTTTTTTAGCAATATCTGCCAATATTAATGTTTGGTCGTCTGCTTTATCAGCCCCTTTCTGCTCTACAGCTTTAACTATACTTGGAGCAGGATATTGCCCAAGTTGTGGGTCTACAGGTCCC…
E10	MJ-1000-58_176	MJ-1000-58-FOR	GCGTAATACGACTCACTATAGGGAGAACCACTTTTTATATTTGCAGACAT	MJ-1000-58-REV	TTTTTTTTTTTTTTTTTTTTTTTTTTGAAACTACTGCTCCAGAGG		ACCACTTTTTATATTTGCAGACATGGGTAGTGGGCAAATAGAGGAAATAATAAAACACAACTTTAATGCAATTATATTAGACCATCATCCTCCAGTTATAAAAGATAGCTTTATCAACGAAAACATCATCCAGCTAAACCCACACATCTTTGGGGTAGATGGATCAAGGGAGATAACTGCAAGTGGAGTTTGTTATTTAGTGGCAAGAGAATTTGGCTACTATGATTTGAGTGTCTTGGCAATAGTAGGAATTATTGGAGATATGCAATACAACCCTCTCTTAGGTTTAAATAAATTTATTGTAAATGAGGCAAGGGAGTATAGATACGTTAAGATAATGAACGATATTGTCTATAATATCTACGATGTTGAAATATACAAAGCAATTGCTTATTGCAC…
E11	MJ-1000-59_327	MJ-1000-59-FOR	GCGTAATACGACTCACTATAGGGAGACCAATGAACTCAGCTATTCTTCT	MJ-1000-59-REV	TTTTTTTTTTTTTTTTTTTTTTTTTTACCTCATTGGATATGGGAAA		CCAATGAACTCAGCTATTCTTCTTAACAAATAACTTTCTCCAGAAAATTCAAATGTATCATCTTCAGGATTCCACCTAAAAACATCATGTAATATAATATCATCAATTTTTGGGTCGTATTCAACAATCTCAGTTATACTCTTAGTTCTTCTAACAAATCTTCCTTTATAAATCAATCTAACCTGCATACATATGGCATTTAGTTGTTCAAGCATAATCTTTGGAATGTTCATTGGTTCAGCATTCAACCTCCTTATAACTGCCTCTGGGGATTTTGCGTGTATCGTTGATAACGCCAAATGTCCTGTAGTTATTGCTTGAAATAATATCTTCGCCTCCTCACCTCTAACCTCTCCAACAATTAAATAATCTGGTCTTTGCCTTAAAGCCGCTTTTAAT…
E12	MJ-1000-60_159	MJ-1000-60-FOR	GCGTAATACGACTCACTATAGGGAGACCTGCTAAAAGAGGTTGGTT	MJ-1000-60-REV	TTTTTTTTTTTTTTTTTTTTTTTTTTCTACAAAACACCAGATGAGAGG		CCTGCTAAAAGAGGTTGGTTGTATAAGATTTGGAGAATTTATCTTAGCCTCTGGTAAAAAAAGTAACTACTACATAGACATAAAAAAAGCCACCACAAACCCAGAAATTTTAAAGTTAGTTGGAGAAATTATTGCTGAGCAAATAAAGGATGAAGATGTAAAAGTTGCTGGAGTAGAGCTTGGTTCTGTCCCTATAGCTACAGCTGTCTCAATTATTGCTCAAAAACCACTATTAATTGTTAGAAAGAAACCTAAGGATTACGGAACTAAAAATAAGATAGAAGGAGAGCTAAAAGAAGGAGATAAGGTTGTTATTGTGGAGGATGTTACTACAACTGGAGGAAGTGTGCTAAAGGCAGTTAAAGAGATTAGGGAAAATGGTGGAATTGTTGATAAAGT…
F1	MJ-1000-61_232	MJ-1000-61-FOR	GCGTAATACGACTCACTATAGGGAGATCCTACACGTTCCCTCATCT	MJ-1000-61-REV	TTTTTTTTTTTTTTTTTTTTTTTTTAACAAACTTGCTGAGAAGATAGATA		TCCTACACGTTCCCTCATCTGAAACCATACAACTACCAACTGGATTTAATGGAGTGCAAACCGTTCCAAACAATGGGCAGTCAGTTGGCAGTTTCTCTCCTCTCAAAATCTTATCACATATACAACCTTTAGGAATTTTCTCTTTAATCTCTGGAATATCCTCATGCTCATAGATGTCAAATTTCTTATACTTCTCCCTCAATCCAAAACCACCATTTTTAACAACTGGGAAACCTCTCCAAGGAACATCTATGCTTTCAAAAACTTCATTTATTATTTTTTGAGCTAAAACATTACCTTCTGGCTTAACTGCTCTAATATATTCATTTTCAACCTTTGCCTCTCCACTGATGACTTGCTTTAAAATCATTATTATAGCCATTAACACATCTATTGGCT…
F2	MJ-1000-62_90	MJ-1000-62-FOR	GCGTAATACGACTCACTATAGGGAGAAGGAGCTCCAGTAGTTTTCC	MJ-1000-62-REV	TTTTTTTTTTTTTTTTTTTTTTTTTAACCACCAAAAGGTATTCTGC		AGGAGCTCCAGTAGTTTTCCCCTCAAAAATTCCTGATAAGATTTCAACTTTATCCTCTTCTTTTCTTGGTGTTGAGAAGATGCTCTGCCCTGGTCTTCTCCTGTCAAGCTCTTTTTGGATATCCTCTTCAGATAAAGGCAGATTAGCTGGACATCCATCAACAACTGCTCCAACAGCCTTTCCATGACTTTCTCCAAAAACTGTAACTCTAAACATATCCCCATAGGTGTTCATTAATGTCACCAAAAATTTTTAATTGCTTAGTTTTACATTTAAAATAAAAATTAAAATAGTCAAAAAATAAAAAAGGTTTATCTGTAGAGAACATCCAAGTGTGCTGGTTCCTTAACTTTAACTTTCTTTTTCTCCATAATCTTCTCAACTGCCTTTCTAAAGTCA…
F3	MJ-1000-63_115	MJ-1000-63-FOR	GCGTAATACGACTCACTATAGGGAGAGAGTTTATAGTCTTTTTTTGATTGC	MJ-1000-63-REV	TTTTTTTTTTTTTTTTTTTTTTTTTCCATTTGTCGCTGTAAAATT		GAGTTTATAGTCTTTTTTTGATTGCCTCAACTAATGCCTCCTTTGTAGGAGCTCCAATAAACTCAACATCCCCATTTATTACAATTGTTGGAACTGCCATTATCCCATATTCCATTGCCTTTTGAGGATTCTCCATAACGTTTATGTATTCTACTTCAACAGCATCCGGCATTTCATTTGCTACCTCTTCAACAACTCTTTTAGCTGCAGGACAGTGAGGACACATTGGTGATGTAAAAAGCTCTATCTTTACCTTTGACATACTAACACCTTAAAAACCTCTTAAGTTTATAATAAAAATTTTATCCAAATTTTTATAAATAGTTTTCCAAAAATAGAATATTAAATTATAGGCTAAAAATTAATGACCACATGTCCAAACTTGTCTGAAGTGTTCAA…
F4	MJ-1000-64_417	MJ-1000-64-FOR	GCGTAATACGACTCACTATAGGGAGACTCTGCTAACATCTCCATCAAC	MJ-1000-64-REV	TTTTTTTTTTTTTTTTTTTTTTTTTTTCATCATCTTTTTTTTCAATATAAC		CTCTGCTAACATCTCCATCAACTTCAACCATTAAAGTGTGCATATGCATTAATGTTGTTGGAACGATAACAGCTGAAGTTAAAATCTTTCCCTCAAACTCTGGGACAACTGAAACAACATCAGGGCCATGATGGGAAGGAACTGTAACTGGGTTTGGTGTTATAGCATTTACTGGCCCTGTTTTGTCGTCATTTGGGTCTGCCGCTCTTCTAACTAACACGATTCTTGCCTTCTTTATATCTGCAATTGAATTTATAGCATATAATATCCTACACAAACCTGTTGTGTTACATGAAACAACTCTTACATAATCTTTTCCATAGCATCTGTTGTAGCTCCACAAAGCGTTGAAGTTATCTTCAACATCTTTTGCTTTTTCTCCCCCTTGCAATATAGCTT…
F5	MJ-1000-65_48	MJ-1000-65-FOR	GCGTAATACGACTCACTATAGGGAGATTAAGAGAGGAATAATTACTTTTTTCA	MJ-1000-65-REV	TTTTTTTTTTTTTTTTTTTTTTTTTAGAATGGTGACATTAATGGCA		TTAAGAGAGGAATAATTACTTTTTTCATCTTACCCACCAAGTTTTAGTTTTCTTATTCTTTCATTTAATTTTTCGACCTCCTCCTTTGTTAATCTTGTAGCTTTTTTAACCTCCTCCAATTCTTTTTGTAACATTATTACTTTAATCCCCAGTATTATGTTGAGGAGTATGCTAATAGCCACAATTATATACAAAATCATCCTTATCTCCTCCCGAACAATCCTTTAATAAACTTAGATATGAATGATTCTTTCTTCTTCTTAAGTTGTGCTTCATATTTAGCTCCAATTAACTTAGCTGCTATCTCCATGATTGCTTGAGCGGCTGGAGAATCTGGATACATAATAACGAGAGGTGTTCCAAATGCAGCTGCCTTCCTAACATGAGGGTCCTCTGGAA…
F6	MJ-1000-66_210	MJ-1000-66-FOR	GCGTAATACGACTCACTATAGGGAGAACCAACTCTGGCCTTTGTG	MJ-1000-66-REV	TTTTTTTTTTTTTTTTTTTTTTTTTAGATTGTTTTAGATGCATGCC		ACCAACTCTGGCCTTTGTGTTGCTATTCCCCAAGCACACAATCCAGTATAACATCTTCCACAAACTCTACAGCCAAGAGCAACCATTGCAGCAGTTCCAATATAGACAGCATCTGCTCCTAAAGCTATAGCCTTAAATACATCTGCTGAACATCTGATTCCTCCACTTGCTATGATGCTAATTTCATTTCTCAAACCTTCCTCTCTCAATCTTTGATCTACTGCGGCAATAGCCATTTCTATTGGGATTCCAACATGGTCTCTGAATACCTTTGGTGCTGCCCCTGTCCCTCCTTTATATCCATCTATAACAACTGCGTCAGCATCACTTGTTGCTATTCCAACAGCAATAGCTGGAGCATTATGGACAGCTGCAATTTTAACAAACACTGGCTTTTTC…
F7	MJ-1000-67_105	MJ-1000-67-FOR	GCGTAATACGACTCACTATAGGGAGACAGCAGCGATTAAGGCAG	MJ-1000-67-REV	TTTTTTTTTTTTTTTTTTTTTTTTTATCTTGTGGTGTTCTAACTTCTTC		CAGCAGCGATTAAGGCAGAGGCGTTTGTATCTGCCATTATAAAGAAGTTTCCTCCAGCAACTCCTTTCTTAATTCCAAACTTAGCTTCAGTTATAAATTCCCCTCCCATGATTGGGATTTTATAAACTTTTCTTCCATATAATTCATCTTTCTTCTCATAACCGTCTCCGAAAAACTTCAACTTAAATCCAACCTTTAACTGCTCATCAGCCATGTCTCCCATAGCATCAAAAATAGCAGTTGTTGGACATGTTAAGACACACTGCCCCAATCTCTCTAACATTTGATGCTCTAACTCTGACTTTTTAGGGTGGCATATCTGTATTATAAATCCTGGTCTTCCATCTGGTGTTTTTGATGGAGGGACATATTTCTCAATTCCTGCTTCTGCTGGACACA…
F8	MJ-1000-68_164	MJ-1000-68-FOR	GCGTAATACGACTCACTATAGGGAGAACATCTGTATAAAAAACACTACAGGG	MJ-1000-68-REV	TTTTTTTTTTTTTTTTTTTTTTTTTAGAACATCCTTACTCATCACCA		ACATCTGTATAAAAAACACTACAGGGTGGTAACATGGTTCTATATAAAATTAGAAGATCAAAAAACGATCCCTGTCCATCAATACCTTCAGCGGTAATTATAGGATATTCTGTTGGATTAAAATTAATTACTGGACATGGAGCTCAGAGCTTAAGCAATATGGCTGGTTCTTATGCTGGAAAGGAATTGGGAATTTACGCAATGAATAATGGTTATGAATTTAAGGATATTAAAGATATTGAAAGATTTCTTAACCAGTTAGATTTTGCAAAGATAGAGATGAATGAGGAAGAGGATGAAATTATAGTAAAGATATCAAAATGCAATCTCTGCCCAAAGAGAATTTGTGGCTATGAATTTGAAGGAACAGCATGCCCTTGGGGAGGATTGTTAATTGGA…
F9	MJ-1000-69_108	MJ-1000-69-FOR	GCGTAATACGACTCACTATAGGGAGAACTATTGGAGAGAAAGATATCAGC	MJ-1000-69-REV	TTTTTTTTTTTTTTTTTTTTTTTTTAACGAGTATGAAGAGTTTTGCA		ACTATTGGAGAGAAAGATATCAGCCAGACCTATTTAGTAGCTCCACAGGCGCTAATAAAAGAGGCAGTATCATTAATTGGAAAGAGTGCTGTTGAGGGGATGATTAGAAGAAGTTCAAATAAATTATTCAAATAATCATAATAAAGTAATACTTATACTGAATATTCGAAATTATTATTTTGGAATTTTACAATATAGGTGATATTATGGCATTAAAATTCACCATTGAAGAGTTATCAAATCAAAAAAGAGATACATTAGGAAGAAATATTGACGTAACTGTTTTTAGATTAATAAGATTTATGGATTTGGAAAGATATTTAGGAAGAGGGGCTCATGGAGTTATTTACGAATGTGGAAGAGAGCTTGGACTGGCATTAAATCCAAAAACTGTTGAAG…
F10	MJ-1000-70_136	MJ-1000-70-FOR	GCGTAATACGACTCACTATAGGGAGAAATACCTTTACAAATGCTTTAACAA	MJ-1000-70-REV	TTTTTTTTTTTTTTTTTTTTTTTTTAACCCATCTTGTTTATAAACATCC		AATACCTTTACAAATGCTTTAACAAGAGGAAATTGTGTTTTTGCCAATTTAAGACCTAATTTAATAGTTAAACCATTAACCTTAGTTGTTCCAAGGCATAATATAGAGAGTGAGATACAGGATGAGCTATTTCAGGGAGTTATTCAGTATGCAGTTGCCAAGGCAGTTGCTGATTTAGATTTAGATGAAGATTTAAAGGTTGTTGTCTCTGTTAATGTCCCAGAGGTTCCAATAACCAATTTAAATAAAAGAAAACTCTTCCAATACTTCTATGCCTCAGCAAAGTTAGCTATAAACAGAGCTTTAAATGAATATCCTTCAAAAGAGAAGGTAAAGAAAGAGAAATATAGAGCTTTGCATCCATTAGTTGGATTTAGGGATGTTAGATTGGAGTATCCT…
F11	MJ-1000-71_175	MJ-1000-71-FOR	GCGTAATACGACTCACTATAGGGAGAGCTAACCGGTCCCAAAAT	MJ-1000-71-REV	TTTTTTTTTTTTTTTTTTTTTTTTTAAGCCCCACTTGGGTCTG		GCTAACCGGTCCCAAAATTGGGTTCCCGGTTAGCACTCACTACTACCTTCTATCTTAAGATACTTTCCAAATATTGACCTTCTCAATGAGATATTAACTTCATCAAGCCATTGATCTGCTATGGGGTCAATATAAACTTTAAATTCATTATCGTAAATTAATTTATCATTTTCGTTGGGGTGGGCGATAGCTATTCCAAACTTAGGACCTCCTCAAGCAAATCCTTCAAAGTATATAACTACTTTATCCTGATTAGCTTTCTTTAACTTATCTAAGATGAATTTCTTAGCTTCATCAGATATAACAACCTTCTTCATTCCATATCACCACTTTTATTATAATCCTATATCTCATATATATAATTTATGGTTATGTCAATACTTAACACAACCATATAAA…
F12	MJ-1000-72_213	MJ-1000-72-FOR	GCGTAATACGACTCACTATAGGGAGAAGATTAATAAGGTGAAAATTTGACA	MJ-1000-72-REV	TTTTTTTTTTTTTTTTTTTTTTTTTGACTTTGCAGTTTATGTTCCAT		AGATTAATAAGGTGAAAATTTGACAAAAAAGGTGGGAATTGTAGATACAACATTTGCAAGGGTGGATATGGCTTCCATAGCTATAAAAAAGTTAAAAGAACTTTCTCCAAATATTAAAATTATTAGAAAAACTGTTCCAGGAATAAAAGATTTACCTGTAGCATGTAAAAAGCTGTTAGAAGAGGAGGGCTGTGATATAGTTATGGCCTTAGGAATGCCTGGAAAGGCAGAGAAAGACAAAGTCTGCGCTCATGAGGCATCTCTTGGCTTAATGTTGGCTCAATTAATGACAAATAAGCATATAATTGAAGTATTTGTTCATGAGGATGAGGCAAAGGATGATAAAGAGTTAGATTGGTTAGCCAAAAGAAGAGCTGAAGAACATGCTGAAAATGTCTA…
G1	MJ-1000-73_118	MJ-1000-73-FOR	GCGTAATACGACTCACTATAGGGAGACCTTGCTTAACCTTAATCTTGC	MJ-1000-73-REV	TTTTTTTTTTTTTTTTTTTTTTTTTCTGAGCTAAGGTTTTTAATGGTC		CCTTGCTTAACCTTAATCTTGCCTTATTACAATATTTTTAGAAAAATAAAAAGTAAAAATAAAAGCAAATCCTTAATCTTTGGTGATATTGATGGAGAGGTATGAAATCCCTAAAGAGATTGGAGAAATAATGTTTGGCTTGTTGTCTCCAGATTACATAAGACAGATGTCAGTTGCTAAGATAGTTACACCAGACACTTATGATGAAGATGGTTATCCAATAGATGGAGGTTTAATGGACACAAGATTGGGAGTTATAGACCCAGGTTTAGTTTGCAAAACATGTGGAGGAAGGATTGGAGAGTGTCCAGGGCATTTTGGGCATATAGAGTTGGCTAAACCAGTAATTCATATAGGATTTGCCAAAACAATATACAAGATATTGAAGGCAGTTTGCCC…
G2	MJ-1000-74_124	MJ-1000-74-FOR	GCGTAATACGACTCACTATAGGGAGATTTCTCTTGACTTTTTCCATAACT	MJ-1000-74-REV	TTTTTTTTTTTTTTTTTTTTTTTTTTCAACAACTCCAGCTGGG		TTTCTCTTGACTTTTTCCATAACTTCCCTAATTGTTCTATAATTCYCTTTCAAAGAGTCCTTATCATAACCAAATACATAAACTCTAACTCTATTTCCTTTTGATTCTATTGTGCAATCAATGTCCATCCTTGATAATCTCTCACAAAGCTCCAAAAGCTCTTCATCACAACTCACTTTTGATGAAATAATCTTTCTCATAGTATCACCAAAATAATAAAGTAAATTTATAAATTACCATAGCTTATATAATAAAGTTTTGCATGAACAAAAATGTTGTGGTGATATATCATGGACGAATTTGAAATGATAAAGAGAAACACATCTGAAATTATCAGCGAGGAAGAGTTAAGAGAGGTTTTAAAAAAAGATGAAAAATCTGCTTACATAGGTTTTGAAC…
G3	MJ-1000-75_91	MJ-1000-75-FOR	GCGTAATACGACTCACTATAGGGAGAATCGGAAAGGGCTACGAT	MJ-1000-75-REV	TTTTTTTTTTTTTTTTTTTTTTTTTAAGTATTGGATGAGCATAGTTCC		ATCGGAAAGGGCTACGATATAATATTCTGCTCATATAATCCAGGTGGAAAAAATCCAAAGATTGCAGAGAAGGTTTATAATGCCTTAAATGAAGGAGGTTTATTTATAAATAAGCAATTCTTTCCAGATAAGGAAGAGGGTATTGAAGACTATATAAACAACATGGAATGGAACTTCTCTAAACCAGAAGGGCTTAAGAAGGGTAAAATAAGATACACATTTGAAGGAGATTTAAATCTCAATGATTATTTAAAATACTTAGAAGATTTAGGTTTTAAAATCTTGGAAGTTGTTGATATGTCAGAACTTTTAGGACTTGACGAAAACTCTTCGAGTTTTCGTAAGTCAGCGAATCCTTCGGATTCGCTTCGATTTAAAGATAATTCACCAGCAAAGATG…
G4	MJ-1000-76_295	MJ-1000-76-FOR	GCGTAATACGACTCACTATAGGGAGACCCAGAATCAATCCATAAATG	MJ-1000-76-REV	TTTTTTTTTTTTTTTTTTTTTTTTTTGTAGTTATTGAAATGCCGTTT		CCCAGAATCAATCCATAAATGGGTTGCTGATGAAACAATGAAGCAATATGCTTTATTAGCCATCTTCCCAAAACACATAGCTGATGCTCATATAAAAGGGGATATACACTTACACGATTTGGAATATGCAGCAACAAGACCTGTTTGTTTGCAACATGATTTAAGACCATTCTTTAAATATGGTTTAAAAGTTGATGGAACTGGATTGCATACTTCTGTTTCAAAACCTGCAAAGCATCCTGAAGTAGCTATACAGCATGCGGCTAAGGTTATGATGGCCGCCCAGACAAATATGAGTGGAGGACAAAGTATAGATGAGTTTAATGTTTGGTTAGCTCCTTATGTTAGAGGGCTTAGCTATGAAAAAATAAAGCAGTTAATGCAGATGTTTATTTATGA…
G5	MJ-1000-77_39	MJ-1000-77-FOR	GCGTAATACGACTCACTATAGGGAGATCATCTGTGTAGGTTTAAACTACATAG	MJ-1000-77-REV	TTTTTTTTTTTTTTTTTTTTTTTTTAGGGTCTGATAGGGCAACA		TCATCTGTGTAGGTTTAAACTACATAGACCACGCAAAAGAGCTTAATATGGAAATTCCAGAGTATCCAATAATATTCTTAAAGCCAACTTCAGCAATTATCTATAACGAAGATTACATAATAAGACCAAGAATATCTAAGAGAGTTGATTATGAGGTTGAATTAGCCATAGTTATTGGAAAAAAATGCAAAAATATCAAAAAAGATGAGGCAAATGACTATATAATGGGATATACAATTTTAAATGATGTAACAGCGAGAGATTTACAGCAGAAGGATGGACAATGGACAAGAGCTAAATCATTTGATACATTCTGCCCAATAGGACCGAGAATAGTTAAAGACATAGACCCAATGAACTTAAATATTGAGTGTAGGGTTAATGGAGAAATAAAGCAGA…
G6	MJ-1000-78_310	MJ-1000-78-FOR	GCGTAATACGACTCACTATAGGGAGATTTCAACAGATCATGGAACTAC	MJ-1000-78-REV	TTTTTTTTTTTTTTTTTTTTTTTTTTCCTCAACATCTGCAAAAGTT		TTTCAACAGATCATGGAACTACGGGAGAAATAAACATTTGGATAGAAAATGTAACATTTAAAAATGATGCAAAATCATATTCCTTTAATTTAACGAATCTTAATATATGGGCAGTAAATAAATCTGCTTATGAGTTGTATTGGAATCCATTTAACAAATCTATCTGGATAGATGGGAGTAATTACACTATAACTCCAAATATTGACATACCTCCAGGAGAAGTATGGAACTCTAAAACCTACAACTTCACATTTAGTGGAGTTCCAATCGTTTGGGCAAACTGCTCATTTACACTGTCAAAAAAAGATTATATCCTTTTAAATGAAGTAAGTCAAATAGGAAGTTCCTATGTTGTTGTTGAGGAGATTTATGTTGTGGGTAGTTATTTGATTAAGGTGA…
G7	MJ-2000-79_172	MJ-2000-79-FOR	GCGTAATACGACTCACTATAGGGAGAGCACGCCCTATTTAACTGG	MJ-2000-79-REV	TTTTTTTTTTTTTTTTTTTTTTTTTGCTGGAGGTAAAATGCTCTT		GCACGCCCTATTTAACTGGAAACCTTCCAAGATTCGGAGAGCATATAAGTTGGGCCGAAAGCTCAGCTGTGAGCTTTGCAAACTCTGTCTTAGGAGCTAAGACAAATAGAGAAGGTGGGCCATCAGCATTAGCAGCTGCAATTATTGGAAAAACACCATATTATGGATATCACTTAGATGAAAATAGAAAGACAACACATATCATTGAGTTAGATGGACAATTAATCTCTAACTTTAAATATGGAGAGAGTTTTTATGGAGCTTTAGGTTACTTAGTTGGGAAGATTGTTAAGAATGGCATTCCATATTTTGAAAATCTATATAAATTAAATCCAAATAACGATAATTTAAAATCCTTGGGAGCTGCAATGGCTGCAAGTGGTGGTATCGCCTTATATC…
G8	MJ-2000-80_255	MJ-2000-80-FOR	GCGTAATACGACTCACTATAGGGAGAACAATGACATAGCTACAGTTCAGAT	MJ-2000-80-REV	TTTTTTTTTTTTTTTTTTTTTTTTTCTCTGCTCCAGCCCTTTT		ACAATGACATAGCTACAGTTCAGATATTTAACTATGGTATTGAGAAGATGAAGGATGTTGTTGTTGAAACTCTTTTAGATTTAGGCATTGACAGCATATATGAAAAAAGTTCTGGAAGGAATAGAAAGAGAGCTGGATTACCAGAAGTAGAAGGAATATTGGCTGGAGAGAAAACAGAAACTATCATTCAAGAGGGAGAGGCAAAATTTAAAGTTACATTTGATGGGCAGAAAACTGGCTTTTTCTTAGACCAGAGAGAAAATAGGTTAGAGCTTGAGAAGTTTATAAAAGAGGGAGATAGGGTTTTGGATATATGTTGTTACACTGGTGGATTTTCAGTTCATGCAGCGATAAGAGGAGCTGAGGTTGTAGGAGTGGATTTATCAAAAAAGGCATTAA…
G9	MJ-2000-81_225	MJ-2000-81-FOR	GCGTAATACGACTCACTATAGGGAGATTCACCCTTATAAACCAAATATACA	MJ-2000-81-REV	TTTTTTTTTTTTTTTTTTTTTTTTTAACCATTTCTATAAAAAATAAAGAATTAG		TTCACCCTTATAAACCAAATATACAACCAACATCCCTCCCAATATATCCAAAACTGCTCCAATAGGAAGAGGGGAGGCGGGCCTATTTATTCCATAGAGGTAGTGGATTGGAAGATAGTATTTCAATGAAAGGATATGACATGAAACCATCAAAATAACTCCCAAAAACATTGTTGCTGGAACTAAGTATCTATGGTCAGAGGTTTTTATTAATGGTCTTGCTAAGTATGGAGCAATAATTCCAATAAACGCAATTAAACCTACATAAGGAATTATAGCTCCAGTTATAAACGAAGCGAAGAATAAAACTAACAGTCGTGTCTTTTTTATATCCAATCCAAAACTTTTCGCATACTGCTCTCCAAACAGTAGGGCGTTTAAAGATTTTATTAAAAACAT…
G10	MJ-2000-82_323	MJ-2000-82-FOR	GCGTAATACGACTCACTATAGGGAGACCTCCCAATTCTTTGGATAC	MJ-2000-82-REV	TTTTTTTTTTTTTTTTTTTTTTTTTACGCTAAAACAAAGGTTGTTG		CCTCCCAATTCTTTGGATACCCCATAGGATGAACTCCAACTGCTACTTTAACTTCAACACCAGCCATCTCTCCCCTCTTAACCTCTAAATTAATCAACCTATCCCAGTGGTCTAAATAAACCTCTGGAGTACTCATTTTATATGGGTCGTGAGCACAGGTTATAATTGTCTCAATTCCACTCAATGCCATTTTTTCCAAATCTTCAAAGCTCCTAACATCTAAGTGAGTGTGGGCATCTATCATCCTATCACCTTAATTTATTTTGTCTTTGAATAACTCTCCACTATAAACTTTGTTTATCGTTTTTATTAAAGTTACTATCCAAAAGAAGAACAACAACCAATATAACCCAAAGCCTATGTAATCAACTATCTCAAACCCAAAGATTTTATAAACCA…
G11	MJ-2000-83_379	MJ-2000-83-FOR	GCGTAATACGACTCACTATAGGGAGATTCACGTGCATTTCCAAA	MJ-2000-83-REV	TTTTTTTTTTTTTTTTTTTTTTTTTATGGCTGAATTTCTTTAGCTC		TTCACGTGCATTTCCAAACCACACTTCATTTTAACGTCATCGTTCATGTTTCCACCTTATTTTGGTCTTTTTAAAACTTAGCTTTTTGGTTTTAAGATTTTTGGTCCCCTTGCTAAGGCAGTTATTCCAGTTCTTGCCATTTCTTTAATTCCTAATGGTTTAACTAAGTCAATAAATGCGTTTATTTTATCTTCACTACCAGTTATCTCTACAATTAAAGATTCTGGACTTAAATCTACAACATTTCCTCTAAATATGCTTGTATATTGAATAACTTGTGATTTTGCACTCTCTGTTGGTGCATAAATCTTTATTAAACAGAGCTCTCTCTGAACGGATTTCTTTTCCTCTAACTCACTAACCTTTATAACATCAATTAATTTGTTGAGTTGTTTGATA…
G12	MJ-2000-84_2	MJ-2000-84-FOR	GCGTAATACGACTCACTATAGGGAGATAAACTCATCTGTTGGAATAAAGTG	MJ-2000-84-REV	TTTTTTTTTTTTTTTTTTTTTTTTTTTGGGAAACACCTAAATCCA		TAAACTCATCTGTTGGAATAAAGTGTAAGTCCAAAGCAACGTCTTTCGGGGACATTCCCATTGCAAGCCCAAGTAATTGGGAGTAGTGTATCACAGGAATATTATATTCCTCTCCAAACTTTTCCTTTATCTCTACTTGCCCTCTGTCAAATTGCAAGTGGCAGAATGGACAAACTTCGGTTATGCAATCGGCTTTTGCTTCTTTTATATTTTCCAATTTTGTTTTAGTCATTTTTAAGGCAACATCTAAATTTCTTGCTCTGACTCCTCCTCCAGCTCCACAACACATATTTTTATCTTTATAATTGACTGACACTGCTCCAAGTGCCTCTACAAGTTCATCAAAAGATCTCGGTCTTTCTGAACTTTCCAATTTTTTAATATCCGTTGGTTTTAAAT…
H1	MJ-2000-85_221	MJ-2000-85-FOR	GCGTAATACGACTCACTATAGGGAGATAGCCAATTCTTTACCCATATT	MJ-2000-85-REV	TTTTTTTTTTTTTTTTTTTTTTTTTATAGGATATTAGCTACTATAATAACAAAAA		TAGCCAATTCTTTACCCATATTGTAGCAGTTTGTTAATTCATCCTCTGTTGGGACATAGTAGAGTTCATATTGATTAATAACTTCAAATCCACATTTCGCCAAGTCTTCAGCAATCTTAGCAACTGCTCCACCTTCTCCCCCCATTGAACCAAAAGTAACCGCCAATCTCTTAAATCCTGTTCTGTTAAATTTCAATCCTCTCAAGTAGTATATGATATCTCCAATTGATGGATATGGCTCATCATAGATTGTTGGAATTCCAAAGAGAACTGCCTTAGCATCTAAGATGTCTTTAACAATCTCACTTCTCTCATCGTAGTGTAAGAAATACATTACAACATCAATTCCCTCACTCATTAAACCCTCTGCAAATGCATGAGCCATCTTTTGTGTTGAGT…
H2	MJ-2000-86_142	MJ-2000-86-FOR	GCGTAATACGACTCACTATAGGGAGATAGACCTCTTTCATTTTTAAAAAGC	MJ-2000-86-REV	TTTTTTTTTTTTTTTTTTTTTTTTTACACACATAGTCCTTCTCTTTATCTATA		TAGACCTCTTTCATTTTTAAAAAGCCCCTATCTGTTAAAATTTTTGCATCTCCTTCTATACAGGTTAATCCTCCCTCATCTGTTACAATAGCAGCTGCCTTTTTCATCGCTGGAACCATATCTGGTGTGGTCATCTCTGTTACTAATATATCCCCTTCTTTAACCTTGTCTATTTCACTAACATCGTGGATTATTTTAACAACACCTGTTGCAATGCCTGGAGATGCCCCAATACCTTTTAATAATATTTTTGCCTCGATATCCTCTTCTTTTGCCTTTTTCTCTTTTTTACCTTTCTTTAAGGTAGTTATCGGTCTTGCTTGAAGCATGTAAAACTTGCCTTTCTCATAAGCCCATTCAACATCCATCGGTTTTCCATAGTGTTTTTCTATATTCAAC…
H3	MJ-2000-87_227	MJ-2000-87-FOR	GCGTAATACGACTCACTATAGGGAGAGCTGAAAAACAGGAAGCTCA	MJ-2000-87-REV	TTTTTTTTTTTTTTTTTTTTTTTTTTACACAGTGATTTACTTTGTGCA		GCTGAAAAACAGGAAGCTCAAGAAGTTAATGAAACTAACGAATAAATTATTTTCAATCCCTCACTCTTTAAGATAAATCTGCTTTTGTTATAGGTGATAATTATGGATGTATCCGTTCAAAGAAGAATGGCGGCTGAGATATTAAAATGTGGAATAGAGAGGGTTTGGATTGACCCAACTCAATTAGATAGAGTCAAAATGGCAATGTCAAAAGATGATATAAGAGCTCTAATTAAAGAAGGAGTTATTAAGAAAAAGCAGAAGAAAGGAATTAGCAGTGCGAGAGTTAAAAAGTTGAAAGAGCAGAGAAAAAAGGGTAGAAGAAGAGGTCCAGGTTCAAGAAGAGGAGCTGCTGGTGCAAGAACTCCACCAAAAGAAAGATGGATGGCTACAATTAGA…
H4	MJ-2000-88_350	MJ-2000-88-FOR	GCGTAATACGACTCACTATAGGGAGAAAAGGCTTATTTTAACCAAATATAAA	MJ-2000-88-REV	TTTTTTTTTTTTTTTTTTTTTTTTTATCACCAAAAGAGGCGAA		AAAGGCTTATTTTAACCAAATATAAAAAAGGATGAATGTAAAATTAATGAATTAATAAATTTTCATTCCGAATTGATTTGATTTTAATATTTTGAAAAAATTTAACAAATAGAATTAAACAGTTTTGAAAGGCACATAAAATTAATTACTTAACCCTTATAGCATCCAAGTTCATTGGCACATAAGTTTGTTTTTTGAACAATCTTCTAACTGTATCTGCAAAATCTAAGCACTTACTCTCTTCTCCATGAACCATAATTATCTTCTCTGGTGAAGGCTTCAATCTTCTGATATACTTAATTAACTGCTTTCTATCACTATGTCCTGAAAATCCTTCAATTGTATAAACCTGTAGATTTATTGGAATTGATTTTGTCTTTCCATTTCTTGTAATGATTG…
H5	MJ-2000-89_265	MJ-2000-89-FOR	GCGTAATACGACTCACTATAGGGAGATCAAACCAACCCTAACCCT	MJ-2000-89-REV	TTTTTTTTTTTTTTTTTTTTTTTTTTTGAAATTAGGAGGTTGAGGTC		TCAAACCAACCCTAACCCTATCCTTCCCCATTGGAATAATCCATGTAAAAAATCTCTCTGAATATTTTCTATCCAAGAAAATATAAACAAAATCATCATCTACCTCAGCATTGACCATTTCAAATTGACAGCTTGATAAAATCTCTCTATTTTTGTTATTTACTAAGCCCAATTTTTTGCCAGTTATTGTTTTAGCTCCATCAGCACCAACAATAATTTTTGGATTTAGGGTTATTTTTTCTCCTAAGTGGGTTATTTCCACTTTATAACCATTTTTATCTTTCTCAATTTTTCCATAAGCTTTTAATAAAAAATCGCATTTTTTTGCCGCTCTAATGGCTATATCTTTATCCATAACCTTTCTCTCAAAAATGTAAGCTCTAATTCCCTCATTGCCTA…
H6	MJ-2000-90_332	MJ-2000-90-FOR	GCGTAATACGACTCACTATAGGGAGAAACCATAGGGCTTCGCCC	MJ-2000-90-REV	TTTTTTTTTTTTTTTTTTTTTTTTTAAGTGGTAAAAAACCTGCTTATT		AACCATAGGGCTTCGCCCTATTGGGATACCTGGATGCATTGCTTCTTTACAGAAGCAATGCCTCTTCTTTATAACTCCTTTGCAACTTCATATCCCTTACTAAATGCCAATAAGTTTTTCTCTTCAGTTCCCTTTGGAACACTATCTAAAATTGCCTTTTCCATACTTTCCTTTGAAACAATATTTGTTAATCTTGTTAAAGCTCCTAACATAACTATATTTGCAACAATTGGAAGTTTTATCTCCTCTGATGCAATCCTTGTAAATGGGATTTTATACATCGTTACATCAACTTCTGGCATTTTATCTGTTGAAACTAAATCCTCATCAACCAATACAACTCCTCCCTCTTTAATATCATCCTTATACTTATCATAAGCCTGCTGTGATAAACAAACC…
H7	MJ-2000-91_226	MJ-2000-91-FOR	GCGTAATACGACTCACTATAGGGAGAAAACATCCATAAACCACTTTTATC	MJ-2000-91-REV	TTTTTTTTTTTTTTTTTTTTTTTTTGATCACATAAATTCATCGTCTCA		AAACATCCATAAACCACTTTTATCAGATTGAGAAAATTTCCCCACATAATAAAAATTAAATAGCTTAACATTAAAATTATTATGTGGAGGTGAGAGGATGATAACATGGTATGGTCATGCATGCTTTAAAGTAGATAATGTGTTAATAGACCCATTTGTTCCAAATCCTTTATGTGATTTGCCTTATGATGAAATAATGGAAGGAGTTGAGGTAATAGCAGTAACTCATGGCCATGCAGACCACTTAGGAAATGCTGAAGAGTTAGCTAAAACCTACAATGTTCCAGTAGTAACGAACCATGAGATTAGTGTCTATTTATCAGAAAGAGGAGTTTGTGCAGAAGGAATGAACATTGGGGGGACTATAGAGATAAATGGAGCAAAATTAACAATGGTTAA…
H8	MJ-2000-92_276	MJ-2000-92-FOR	GCGTAATACGACTCACTATAGGGAGAATTGAAATTGAAAAAATAGAAGAAA	MJ-2000-92-REV	TTTTTTTTTTTTTTTTTTTTTTTTTATGAAAGATATAGCAGAGGAGGTT		ATTGAAATTGAAAAAATAGAAGAAAAAAGATTAAATACTTACATTGAGTTTCCAGAAGGTATTAGTAGATTGTCCTCTGATGATATATTGGAATTAAACAAAAAATTAGATGAAGGAGTTAAATACATAAAGCTAATATTTGCTGAATTAGAAGAGCATAAAAAAGTGTTATTGGAAATTAAGGATATGCATGTAAAAACAGTTGAAATATTAAGTGAGCATACAAGAATACTAAATGAAATTAAAGACACTCTAAAGGATATAAAAGATAAACTTTAAAAATATTCTTTAAAAATATTAACGCGATGATGAGTGCCGACTTCACTGAACTGTGATGAAACCTGGGACAGCTGAGCGTTACTATTTCTTTAGTTATTTTTATCAATTTTTATTGGTGGG…
H9	MJ-2000-93_108	MJ-2000-93-FOR	GCGTAATACGACTCACTATAGGGAGATAATTTACAGTTCAAACACAAAAAAG	MJ-2000-93-REV	TTTTTTTTTTTTTTTTTTTTTTTTTAACTGCATTTTTATTGGGAAC		TAATTTACAGTTCAAACACAAAAAAGGAGATGTGGTATTTTGAGGGTGGAAATTATTTTTTTGGGATGTGGTGGTGGAAGATGGGCAACAATAACACAAAAAAAGGCAACAGGAGGGTTTAGAATCCATACAAATGAGCTTAGAATGCATGTAGATCCTGGCCCGGGAGCGATAGTGAGATTAAACGAGCTAAAAATATCTCCATGGAGAACTAATGCCCTGTTTATATCTCACTGCCATCCAGACCACTACACTGATGGAGAAATTATTGTTGAAGCTATAACTCAAGGAATGACAAAAAAGCGAGGAGTTTTTTTAGGTAGCTTATCAGTTGTTGAAGGTTTTGGAGAATATGAGTATGTTGTATCAAAATACCATCAATCAAAGCTTGAAGAGGTT…
H10	MJ-2000-94_239	MJ-2000-94-FOR	GCGTAATACGACTCACTATAGGGAGATGGTGTTGTCCCAATAACAG	MJ-2000-94-REV	TTTTTTTTTTTTTTTTTTTTTTTTTCTGACCTCCTCTCCGAGC		TGGTGTTGTCCCAATAACAGGAATTTGTTTAGGTAATCAACTTTTATCCTTAGCATTTGGTGGAGAAACATACAAGATGAAGTTTGGGCATAGGGGAGGAAACCAGCCAGTTAAAGATTTAAAAACACAAAAAGTTTATATAACCTCCCAAAACCATGGATTTGCTGTTAGAAAGGAGAGCTTACCAGATGATGTAGAAGTTAGCTTTATAAATCTAAACGATATGACTGTTGAAGGTATTAGGCATAAGGATTTACCAATATTCTCAGTTCAATTCCACCCAGAGGCAAGACCAGGACCTCATGACACAATGTTTTTATTCGATGAGATGATTAAGCTGAAGGATAGGAAATAAACTTCTAAAAAATATTTTTATTTTATTGCCTTGAAGGTTAATTT…
H11	MJ-2000-95_97	MJ-2000-95-FOR	GCGTAATACGACTCACTATAGGGAGATAGTAATTTATATATCTCTGCTACCCTACT	MJ-2000-95-REV	TTTTTTTTTTTTTTTTTTTTTTTTTAAGAATGTTGAGGGATTTGTC		TAGTAATTTATATATCTCTGCTACCCTACTAATTTTTAAAATTAATTCTTTAAGGTGAAATGAATGTATGAAGTTAGGGACATAAACCTCTGGAAAGAAGGAGAGAGAAAAATACAATGGGCAAAACAACACATGCCTGTTTTAAATTTAATTAGAGAAAGATTTAAAGAAGAAAAGCCATTTAAAGGAATAACAATAGGAATGGCTCTACACTTAGAAGCAAAAACAGCTGTTTTAGCAGAGACATTGATGGAAGGAGGGGCAGAGATTGCTATAACTGGATGCAATCCTTTATCCACTCAGGATGATGTTGCCGCTGCTTGTGCTAAAAAAGGAATGCATGTTTATGCATGGAGAGGAGAGACAGTAGAGGAGTATTATGAAAACCTAAACAAGGTT…
H12	MJ-2000-96_153	MJ-2000-96-FOR	GCGTAATACGACTCACTATAGGGAGACTTGGTTCAACATTTCTAAGTTTC	MJ-2000-96-REV	TTTTTTTTTTTTTTTTTTTTTTTTTTGGTGGTAGTATGAATATCTATGTTT		CTTGGTTCAACATTTCTAAGTTTCAAGGTATCACCAACTTAGATAGTTATTTTAATGTTTTCACTATGTAATTGGATGTAGGGTGTATATAAAGGTTGTGGTTTGGTGAGAGAATGAGATACATGAAAATCATCATTCCAAAAAAATTCCTAAATACTGTTGAGGAAATTTTAAAAAAGAACAATGCCTACTCAATATCAATAATTGAACCATTAAAGACATCAATTGAAGATGGAATCATCATAACATGCAACGCAGATGCAAGAGATGCAGAAAAAATAGTTTTAGAATTAAAAAAATTAGGTTTAGGAGAGAAAGGTCATGGAAGTGTGACAATAATGCCAGCAAACATAACATTCTCATGTAGGGAGGAGGGAATAGCTTCAACAAGCTTGTCTC…
