# Supplementary material for: Extensive Gene-Specific Translational Reprogramming in a Model of B Cell Differentiation and Abl-Dependent Transformation
Source: PLoS One. 2012 May 31;7(5):e37108. doi: 10.1371/journal.pone.0037108 (PMC3365017; doi:10.1371/journal.pone.0037108)
Supplement: Table S6 — Pooling of fractions for gradient encoding. (XLS) [file pone.0037108.s009.xls]

## Sheet: Sheet1
Table S6. Doping controls added to each fraction, and subsequent volumes added to either pool A or pool B for each fraction (ie. pooling scheme).
Fraction:	1	2	3	4	5	6	7	8	9	10	11	12	13	14	15	total volume
Doping controls:	H1	G1	F1	E1	A1	B1	C1	D1	H2	G2	F2	E2	B2	C2	D2
	A3	B3	C3	D3	E3	F3	G3	H3	A4	B4	C4	D4	F4	G4	H4
	H5	G5	F5	E5	D5	C5	B5	A5	H6	G6	F6	E6	C6	B6	A6
	A7	B7	C7	D7	E7	F7	G7	H7	A8	B8	C8	D8	F8	G8	H8
	H9	G9	F9	E9	D9	C9	B9	A9	H10	G10	F10	E10	C10	B10	A10
	NA	NA	A11	B11	C11	D11	NA	NA	NA	E11	F11	A12	C12	D12	NA
	NA	NA	NA	NA	NA	NA	NA	NA	NA	NA	NA	H12	NA	NA	NA
uL of fraction into tube A	3	5	10	21	39	70	116	175	234	280	311	329	340	344	347	2624
uL of fraction into tube B	347	344	340	329	311	280	234	175	116	70	39	21	10	5	3	2624
Fractions were pooled into tubes A and B
RNA from tubes A and B was harvested and labeled with Cy5 and Cy3, respectively
100pg of each doping control (indicated by well position*) was added to each fraction
* See Table S5 for primers and sequence of IVT product for each well position
