# Supplementary material for: Extensive Gene-Specific Translational Reprogramming in a Model of B Cell Differentiation and Abl-Dependent Transformation
Source: PLoS One. 2012 May 31;7(5):e37108. doi: 10.1371/journal.pone.0037108 (PMC3365017; doi:10.1371/journal.pone.0037108)
Supplement: Table S7 — Ratios of Ambion doping controls used to normalize the mRNA abundance data. (XLS) [file pone.0037108.s010.xls]

## Sheet: Sheet1
Table S7. Ambion Doping Control Mixing Scheme
				sample	reference
Ambion Spike	ratio(sample/ref)	MEEBO ID	MEEBO probe name	C5 (pg)	Cy3 (pg)
1	0.125	mSQ037383	AmbionSpike1_222	22.2	177.8
1	0.125	mSQ037284	AmbionSpike1_EC2	22.2	177.8
2	0.25	mSQ036999	AmbionSpike2_EC12	40	160
2	0.25	mSQ037195	AmbionSpike2_516	40	160
3	0.5	mSQ036934	AmbionSpike3_EC3	66.6	133.4
3	0.5	mSQ036992	AmbionSpike3_146	66.6	133.4
4	1	mSQ037698	AmbionSpike4_918	100	100
4	1	mSQ037204	AmbionSpike4_EC15	100	100
5	1	mSQ037114	AmbionSpike5_EC17	100	100
5	1	mSQ036891	AmbionSpike5_931	100	100
6	1.5	mSQ036987	AmbionSpike6_688	120	80
6	1.5	mSQ036951	AmbionSpike6_EC13	120	80
7	4	mSQ036964	AmbionSpike7_1334	160	40
7	4	mSQ037036	AmbionSpike7_EC18	160	40
8	8	mSQ036869	AmbionSpike8_EC5	177.8	22.2
8	8	mSQ036926	AmbionSpike8_1800	177.8	22.2
