# Supplementary material for: Extensive Gene-Specific Translational Reprogramming in a Model of B Cell Differentiation and Abl-Dependent Transformation
Source: PLoS One. 2012 May 31;7(5):e37108. doi: 10.1371/journal.pone.0037108 (PMC3365017; doi:10.1371/journal.pone.0037108)
Supplement: Table S8 — Taqman probes used for qRT-PCR analysis. (XLS) [file pone.0037108.s011.xls]

## Sheet: Sheet1
Table S8. Taqman assays or custom made primers and probe set purchased from Ambion
Gene.name	Assay
Coro1a	Mm00486998_m1
Eif3c	Mm00469529_g1
HMGA1	Mm01302616_g1
hnRNPA1	Mm02528230_g1
Hsp90ab1	Mm00833431_g1
Irf4	Mm005516431
MEK1 (Map2k1)	Mm00435940_m1
Tcf12	Mm00441699_m1
Xrcc4	Mm01283067_m1
custom made doping control primer set:
IVT product:	For	Rev	Taq_Probe
AATACCTTTACAAATGCTTTAACAAGAGGAAATTGTGTTTTTGCCAATTTAAGACCTAATTTAATAGTTAAACCATTAACCTTAGTTGTTCCAAGGCATAATATAGAGAGTGAGATACAGGATGAGCTATTTCAGGGAGTTATTCAGTATGCAGTTGCCAAGGCAGTTGCTGATTTAGATTTAGATGAAGATTTAAAGGTTGTTGTCTCTGTTAATGTCCCAGAGGTTCCAATAACCAATTTAAATAAAAGAAAACTCTTCCAATACTTCTATGCCTCAGCAAAGTTAGCTATAAACAGAGCTTTAAATGAATATCCTTCAAAAGAGAAGGTAAAGAAAGAGAAATATAGAGCTTTGCATCCATTAGTTGGATTTAGGGATGTTAGATTGGAGTATCCT…	GGGTTGAGGTAAGATTGGCATT	TTTTGGTGCTACTCCACTTATTGC	AAGCAACAGCTAATGCA
